# Supplementary material for: Solvent coordination to palladium can invert the selectivity of oxidative addition
Source: Royal Society of Chemistry journal article supplement (doi:10.1039/d1sc05862b), 2021-12-22
Supplement: d1sc05862b2.pdf [file d1sc05862b2.pdf]

## **Supporting Information**

for

### **Solvent Coordination to Palladium Can Invert the Selectivity of Oxidative Addition**

*Emily K. Elias, Steven M. Rehbein, Sharon R. Neufeldt\**

*Department of Chemistry and Biochemistry, Montana State University  
Bozeman, MT 59717, USA*

*\*Correspondence: [sharon.neufeldt@montana.edu](mailto:sharon.neufeldt@montana.edu)*

## Table of Contents

|                                                                                          |     |
|------------------------------------------------------------------------------------------|-----|
| <b>I. Experimental Details</b>                                                           |     |
| <b>A. General Materials and Methods</b>                                                  | S4  |
| <b>B. Synthesis and Characterization of Substrates and Authentic Samples of Products</b> | S5  |
| <b>C. Catalytic Suzuki Couplings of <b>1</b></b>                                         |     |
| 1. Evaluation of Precatalyst and Water Effect on Selectivity                             | S9  |
| 2. Benzonitrile Additives (Table 1 and Figure 1)                                         | S11 |
| 3. Mixed THF/Benzonitrile Solvent                                                        | S14 |
| 4. Results with Fluoroacetonitrile, Sulfolane (Table 2), and Tetrahydrothiophene         | S16 |
| 5. Effect of Temperature (Table 4)                                                       | S17 |
| 6. Effect of Additives (Table 6)                                                         | S20 |
| 7. Recycling “Decomposed” Catalyst                                                       | S21 |
| <b>D. Reactions with <b>3a</b> and <b>3b</b></b>                                         |     |
| 1. Catalytic Suzuki Couplings                                                            | S24 |
| 2. Stoichiometric Oxidative Addition Studies (Table 3)                                   |     |
| a. <sup>19</sup> F NMR Calibrations                                                      | S25 |
| b. <sup>19</sup> F NMR Chemical Shifts                                                   | S25 |
| c. Oxidative Addition Reactions                                                          | S26 |
| <b>E. Reactions with <b>S15a</b> and <b>S15b</b></b>                                     |     |
| 1. Catalytic Suzuki Couplings                                                            | S32 |
| 2. Stoichiometric Oxidative Addition Studies                                             |     |
| a. <sup>19</sup> F NMR Calibrations                                                      | S33 |
| b. <sup>19</sup> F NMR Chemical Shifts                                                   | S33 |
| c. Oxidative Addition Reactions                                                          | S33 |
| <b>F. Stille Cross-Couplings</b>                                                         |     |
| 1. Reactions of <b>1</b> (Scheme 3)                                                      | S35 |
| 2. Reactions of <b>8</b> (Table 5)                                                       | S36 |
| 3. Independent Reactions of an Aryl Chloride and an Aryl Triflate                        | S37 |
| 4. Efforts to Reproduce Literature Results for the Base-Free Stille Coupling of <b>1</b> | S39 |
| <b>G. Evaluation of Alternative Hypotheses</b>                                           |     |
| 1. Alternative Hypothesis: Is Solvent Effect Related to KF Solubility?                   | S41 |
| 2. Alternative Hypothesis: Is Oxidative Addition Reversible (Curtin-Hammett)?            | S43 |
| 3. Alternative Hypothesis: "Greasy Tin Hypothesis"                                       | S45 |
| 4. Alternative Hypothesis: Effect of Bu <sub>3</sub> SnOTf                               | S46 |
| 5. Alternative Hypothesis: Autocatalysis in Stoichiometric Oxidative Addition?           | S47 |
| <b>H. Error Analysis</b>                                                                 | S49 |
| <b>II. Computational Details</b>                                                         |     |
| <b>A. General Methods</b>                                                                | S51 |
| <b>B. Reaction Free Energy Diagram Using DMF Calculated with B3LYP-D3(BJ)</b>            | S52 |
| <b>C. DFT Predictions at 100 °C</b>                                                      | S53 |
| <b>D. Discussion of DFT Shortcomings</b>                                                 | S53 |
| <b>E. Energies, Entropies, and Lowest Frequencies of Minimum Energy Structures</b>       | S56 |
| <b>III. References</b>                                                                   | S58 |

|                                                                                      |      |
|--------------------------------------------------------------------------------------|------|
| <b>IV. NMR Spectra</b>                                                               |      |
| <b>A. Compound Characterization</b>                                                  | S60  |
| <b>B. Stoichiometric Oxidative Addition Studies with <b>3a</b> and <b>3b</b></b>     |      |
| <b>1. Experiments from Table 3 and with Deuterated Solvents</b>                      | S89  |
| <b>2. Experiments in DMF at 100 and 0 °C</b>                                         | S120 |
| <b>3. Monitoring the Reaction in DMF over Time</b>                                   | S124 |
| <b>4. Reactions in the Presence of Additives</b>                                     | S136 |
| <b>C. Stoichiometric Oxidative Addition Studies with <b>S15a</b> and <b>S15b</b></b> | S144 |
| <b>D. Reaction with <b>S11</b> and NBu<sub>4</sub>OTf</b>                            | S154 |

## I. Experimental Details

### A. General Materials and Methods

NMR spectra were recorded at 298 K on Bruker DPX Avance I 300 MHz (300.130 MHz for  $^1\text{H}$ , 75.468 MHz for  $^{13}\text{C}$ , 282.404 MHz for  $^{19}\text{F}$ , 121.495 MHz for  $^{31}\text{P}$ ), Bruker Ascend 400 MHz (400.130 MHz for  $^1\text{H}$  NMR, 100.613 for  $^{13}\text{C}$ , 376.498 for  $^{19}\text{F}$ , 161.967 for  $^{31}\text{P}$ ), Bruker Ascend Avance III 500 MHz (500.130 for  $^1\text{H}$ , 125.758 MHz for  $^{13}\text{C}$ , 470.592 for  $^{19}\text{F}$ , 202.478 MHz for  $^{31}\text{P}$ ), or Bruker Avance III 600 MHz (600.130 MHz for  $^1\text{H}$ , 150.903 for  $^{13}\text{C}$ ) NMR spectrometers.  $^1\text{H}$  and  $^{13}\text{C}$  NMR chemical shifts are reported in parts per million (ppm) relative to TMS, with the residual solvent peak used as an internal reference [ $^1\text{H}$  NMR:  $\text{CHCl}_3$  (7.26 ppm);  $^{13}\text{C}$  NMR:  $\text{CDCl}_3$  (77.16 ppm).]  $^{19}\text{F}$  chemical shifts are reported in ppm relative to fluorobenzene (−113.15 ppm). Multiplicities are reported as follows: singlet (s), doublet (d), triplet (t), quartet (q), quartet of triplets (qt), triplet of triplets (tt), triplet of quintets (tqn), triplet of sextets of doublets (tsd), multiplet (m). GC data were collected using a Shimadzu GC-2010 Plus with a flame ionization detector equipped with a SH-Rxi-5ms capillary column (15 m x 0.25 mm ID x 0.25  $\mu\text{m}$  df). GCMS data were collected on a Shimadzu GCMS-QP2020 NX gas chromatograph mass spectrometer. HRMS data were collected on a Bruker MicroTOF II in acetonitrile with NaCl doping. Purifications via flash chromatography were performed using a Biotage Selekt Flash Purification System. "Room temperature" reactions described herein are generally between 23–25  $^\circ\text{C}$  as measured by a temperature probe on the reaction stir plates.

Unless otherwise noted, all commercially-obtained chemicals were used as received. Anisotrile, dioxane, *N,N*-dimethylformamide, *p*-cresol,  $\text{PdCl}_2$ , KF, sulfolane, 4-(dimethylamino)benzonitrile, 4-chlorophenol, and 4-chlorotoluene were obtained from Acros Organics. Propylene carbonate was obtained from Aldrich Chemical. Acetonitrile,  $\text{K}_2\text{CO}_3$ , tetrahydrothiophene,  $\text{P}^t\text{Bu}_3$ , and 4-methylbiphenyl were obtained from Alfa Aesar. Benzonitrile was obtained from Eastman Chemical. *p*-Xylene was obtained from Honeywell Fluka Research Chemicals. 4-Chloro-1,1'-biphenyl was obtained from Matrix Scientific. Biphenyl, methyl-4-cyanobenzoate, nitromethane, *o*-tolyl boronic acid, phenyl boronic acid, tetrabutylammonium bromide, tetrabutylammonium chloride, tetrabutylammonium fluoride hexahydrate, tetrabutylammonium trifluoromethanesulfonate, tetrabutylstannane, trifluoromethanesulfonic anhydride, 1-chloro-2-trifluoromethylbenzene, 1-naphthol, 18-crown-6, 2-bromobenzotrifluoride, 2-chlorobenzotrifluoride, 4-(trifluoromethyl)benzonitrile, 4-aminobenzonitrile, 4-ethoxybenzonitrile, 4-fluorobenzonitrile, 4-hydroxybenzonitrile, and 4-nitrobenzonitrile were obtained from Oakwood Chemical. The boronic acids were recrystallized from water prior to use. 1-Methylnaphthalene,  $^n\text{Bu}_3\text{SnOTf}$ ,  $\text{Me}_3\text{SnPh}$ , and  $\alpha, \alpha, \alpha$ -trifluorotoluene were obtained from Millipore Sigma. Bis(tri-*t*-butylphosphine)palladium(0), methanesulfonato(tri-*t*-butylphosphino)(2'-methylamino-1,1'-biphenyl-2-yl)palladium(II) (Buchwald's precatalyst  $\text{P}^t\text{Bu}_3\text{-Pd-G4}$ ), and  $\text{Me}_3\text{SnBr}$  were obtained from Strem Chemical. Fluoroacetonitrile, *N*-methyl-2-pyrrolidone, *p*-terphenyl, *p*-tolunitrile, 1-chloronaphthalene, 1,4-dimethylnaphthalene, 4-chlorobenzotrifluoride, 4-chloro-1-naphthol, 4-hydroxybenzotrifluoride, and 4-phenyl-1-bromonaphthalene were obtained from TCI America.  $\text{KPF}_6$  was obtained from Alfa Aesar, Oakwood Chemical, or Millipore Sigma.  $^n\text{Bu}_3\text{SnPh}$  was obtained from Alfa Aesar or Millipore Sigma. Tris(dibenzylideneacetone)dipalladium(0) ( $\text{Pd}_2\text{dba}_3$ ) was obtained from Millipore Sigma or Strem Chemical. Compounds **1**,<sup>1</sup> **2a**,<sup>1</sup> **2b**,<sup>1</sup> **3a**,<sup>1</sup> **3b**,<sup>1</sup> **4b**,<sup>2</sup>  $\text{Pd}(\text{COD})(\text{CH}_2\text{TMS})_2$ ,<sup>3</sup>  $[\text{Pd}(\text{P}^t\text{Bu}_3)(\text{o-CF}_3\text{Ph})(\text{Cl})]$  (**S10**),<sup>4</sup> and  $\text{P}^t\text{Bu}_3\cdot\text{HCl}$ <sup>5</sup> were synthesized according to literature procedures.

Acetone, acetonitrile, chloroform, dichloromethane, diethyl ether, dimethyl formamide (DMF), dimethylsulfoxide (DMSO), ethanol, ethyl acetate, fluorobenzene, hexanes, isopropanol, methanol, pentane, tetrahydrofuran (THF), and toluene were obtained from Fisher Chemical. Benzene was obtained from TCI America. Solvents were used as received except for those that were used inside the glovebox. In these cases, MeCN, MeOH, DMF, toluene, and fluorobenzene were degassed and dried with a JC Meyer solvent system prior to use. The dried DMF, MeCN, toluene, and methanol were stored over molecular sieves in the glovebox. Deuterated solvents ( $\text{CDCl}_3$ ,  $\text{C}_6\text{D}_6$ ) were obtained from Cambridge Isotopes and stored over molecular sieves.

## B. Synthesis and Characterization of Substrates and Authentic Samples of Products

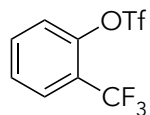

**2-(Trifluoromethyl)phenyl triflate (3b):** The title compound was prepared according to a modified literature procedure.<sup>6</sup> With cooling to 0 °C, a solution of trifluoromethanesulfonic anhydride (4.0 mL, 24.0 mmol, 1.2 equiv) in  $\text{CH}_2\text{Cl}_2$  (10 mL) was added dropwise to a solution of 2-hydroxybenzotrifluoride (3.24 g, 20.0 mmol) and pyridine (3.23 mL, 40.0 mmol, 2 equiv) in  $\text{CH}_2\text{Cl}_2$  (20 mL). The mixture was allowed to warm to room temperature and stirred for 1 h, after which the solution was diluted with  $\text{Et}_2\text{O}$  and acidified with aqueous 1 M HCl. The layers were separated, and the aqueous layer was washed with  $\text{Et}_2\text{O}$  (3 x 10 mL). The combined organic layers were washed with saturated  $\text{NaHCO}_3$  and brine (aqueous NaCl), dried over  $\text{MgSO}_4$ , filtered, and concentrated to give a yellow oil that was purified through a short silica plug (100% hexanes) to afford **3b** as a clear, colorless oil (4.40 g, 75 % yield). Spectral data are consistent with those previously reported.<sup>7</sup>

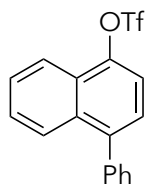

**4-Phenylnaphthalen-1-yl triflate (9a).** The title compound was prepared according to a modified literature procedure.<sup>8</sup>  $\text{Pd-P}^t\text{Bu}_3\text{-G4}$  (7.0 mg, 0.012 mmol, 3 mol %), phenyl boronic acid (49.3 mg, 0.404 mmol, 1.01 equiv), and KF (69.7 mg, 1.20 mmol, 3 equiv) were combined in a 1-dram vial equipped with a magnetic stir bar. In rapid succession, 4-chloronaphthalen-1-yl triflate (**8**, 79  $\mu\text{L}$ , 0.40 mmol), deionized water (7.2  $\mu\text{L}$ , 0.40 mmol, 1 equiv), and THF (1.0 mL) were added to the vial and the mixture was immediately sparged with nitrogen for ~2 min. The vial was sealed with a PTFE-lined cap and the reaction was stirred at room temperature for 24 h. The reaction mixture was extracted with ethyl acetate, and the organic extract was filtered over a plug of celite. The filtrate was concentrated and then purified by flash column chromatography (100% hexanes) to afford **9a** as a colorless oil (40 mg, 28% yield).  $^1\text{H}$  NMR (500 MHz,  $\text{CDCl}_3$ ,  $\delta$ ): 8.17 (d,  $J$  = 8.5 Hz, 1H), 7.95 (d,  $J$  = 8.5, 1H), 7.69 (t,  $J$  = 7.6 Hz, 1H), 7.51 (multiple overlapping signals, 8H).  $^{13}\text{C}\{^1\text{H}\}$  NMR (126 MHz,  $\text{CDCl}_3$ ,  $\delta$ ): 145.2, 141.3, 139.4, 133.3, 130.1, 128.6, 128.0, 127.8, 127.6, 126.8, 126.7, 126.2, 121.1, 118.9 (q,  $^1J_{\text{CF}}$  = 320 Hz), 117.4;  $^{19}\text{F}$  (471 MHz,  $\text{CDCl}_3$ ,  $\delta$ ): -73.3. HRMS (ESI/Q-TOF)  $m/z$ :  $[\text{M}+\text{Na}]^+$  Calcd for  $\text{C}_{17}\text{H}_{11}\text{F}_3\text{NaO}_3\text{S}^+$  375.0273. Found 375.0261.

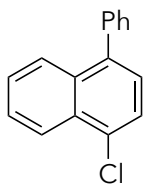

**1-Chloro-4-phenylnaphthalene (9b).** PdCl<sub>2</sub> (2.1 mg, 0.012 mmol, 3 mol %), phenyl boronic acid (48.8 mg, 0.40 mmol, 1 equiv), and KF (69.7 mg, 1.20 mmol, 3 equiv) were combined in a 1-dram vial equipped with a magnetic stir bar. In rapid succession, 4-chloronaphthalen-1-yl triflate (**8**, 79 μL, 0.40 mmol), deionized water (7.2 μL, 0.40 mmol, 1 equiv), and acetonitrile (750 μL) were added to the vial and the mixture was immediately sparged with nitrogen for ~2 min. The vial was sealed with a PTFE-lined cap and the reaction was stirred at room temperature for 22 h. The reaction mixture was extracted with ethyl acetate, and the organic extract was filtered over a plug of celite. The filtrate was concentrated and then purified by flash column chromatography (100% hexanes) to afford **9b** as a colorless oil (79 mg, 84% yield). Spectral data are consistent with those previously reported.<sup>9</sup>

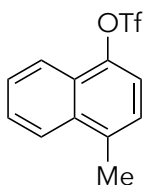

**4-Methylnaphthalen-1-yl triflate (9c):** In a nitrogen-filled glovebox, Pd<sub>2</sub>dba<sub>3</sub> (6.9 mg, 0.0075 mmol 1.5 mol %), Pd(P<sup>*t*</sup>Bu<sub>3</sub>)<sub>2</sub> (7.7 mg, 0.015 mmol, 3.0 mol %), and KPF<sub>6</sub> (276 mg, 1.50 mmol, 3 equiv) were combined in a 1-dram vial equipped with a magnetic stir bar. In rapid succession, 4-chloronaphthalen-1-yl triflate (**8**, 98 μL, 0.50 mmol), PhSnMe<sub>3</sub> (100 μL, 0.55 mmol, 1.1 equiv), and DMF (1.0 mL) were added. The vial was sealed with a PTFE-lined cap and the mixture was stirred at 100 °C for 24 h. The reaction mixture was extracted with ethyl acetate, and the organic extract was filtered over a plug of celite. The filtrate was concentrated and then purified by flash column chromatography (100% hexanes, dry-loaded on C18 silica gel) to afford **9c** as a white solid (52 mg, 36% yield). <sup>1</sup>H NMR (500 MHz, CDCl<sub>3</sub>, δ): 8.21-8.01 (two overlapping signals, 2H), 7.68-7.60 (two overlapping signals, 2H), 7.38-7.30 (two overlapping signals 2H), 2.71 (s, 3H); <sup>13</sup>C{<sup>1</sup>H} NMR (126 MHz, CDCl<sub>3</sub> δ): 144.4, 135.6, 133.9, 127.6, 127.3, 126.5, 125.7, 124.7, 122.7, 118.8 (q, <sup>1</sup>J<sub>CF</sub> = 320 Hz), 117.5, 19.4; <sup>19</sup>F (471 MHz, CDCl<sub>3</sub>, δ): -73.4. HRMS (ESI/Q-TOF) *m/z*: [M+Na]<sup>+</sup> Calcd for C<sub>12</sub>H<sub>9</sub>F<sub>3</sub>NaO<sub>3</sub>S<sup>+</sup> 313.0117. Found 313.0123.

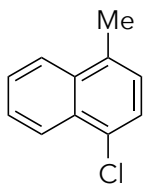

**1-Chloro-4-methylnaphthalene (9d):** In a nitrogen-filled glovebox, Pd<sub>2</sub>dba<sub>3</sub> (6.9 mg, 0.0075 mmol 1.5 mol %), Pd(P<sup>*t*</sup>Bu<sub>3</sub>)<sub>2</sub> (7.7 mg, 0.015 mmol, 3.0 mol %), and KPF<sub>6</sub> (276 mg, 1.50 mmol, 3 equiv) were combined in a 1-dram vial equipped with a magnetic stir bar. In rapid succession, 4-chloronaphthalen-1-yl triflate (**8**, 98 μL, 0.50 mmol), PhSnMe<sub>3</sub> (100 μL, 0.55 mmol, 1.1 equiv), and DMF (1.0 mL) were added. The vial was sealed with a PTFE-lined cap and the mixture was stirred at room temperature for 24 h. The reaction mixture was extracted with ethyl acetate, and the organic extract was filtered over a plug of celite. The filtrate was concentrated and then purified by flash column chromatography (100% hexanes, dry-loaded on C18 silica gel) to afford **9d** as a white solid (31 mg, 35% yield). Spectral data are consistent with those previously reported,<sup>10</sup> but higher resolution data are included here. <sup>1</sup>H NMR (400 MHz, CDCl<sub>3</sub>, δ): 8.30 (dd, *J* = 7.6 Hz, 1H), 8.0 (dd, 7.5 Hz, 1H), 7.70-7.57 (two overlapping signals, 2H), 7.46 (d, 7.7 Hz, 1H), 7.23 (d, 7.7 Hz, 1H, overlaps with solvent), 2.67 (s, 3H); <sup>13</sup>C{<sup>1</sup>H} NMR (101 MHz, CDCl<sub>3</sub> δ): 133.8, 133.7, 130.8, 130.2, 130.0, 128.5, 126.8 (d, *J* = 7.2 Hz), 126.5, 125.9, 124.1, 124.7, 19.4.

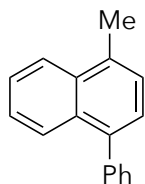

**1-Methyl-4-phenylnaphthalene (9f):** The title compound was prepared according to a modified literature procedure.<sup>8</sup> Pd-P<sup>t</sup>Bu<sub>3</sub>-G4 (7.0 mg, 0.012 mmol, 3 mol %), phenyl boronic acid (49.3 mg, 0.404 mmol, 1.01 equiv), and KF (69.7 mg, 1.20 mmol, 3 equiv) were combined in a 1-dram vial equipped with a magnetic stir bar. In rapid succession, 1-bromo-4-methylnaphthalene (63  $\mu$ L, 0.40 mmol), deionized water (7.2  $\mu$ L, 0.40 mmol, 1 equiv), and THF (1.0 mL) were added to the vial and the mixture was immediately sparged with nitrogen for ~ 2 min. The vial was sealed with a PTFE-lined cap and the reaction was stirred at room temperature for 24 h. The reaction mixture was extracted with ethyl acetate, and the organic extract was filtered over a plug of celite. The filtrate was concentrated and then purified by flash column chromatography (100% hexanes) to afford **9f** as a white solid (76 mg, 87% yield). Spectral data are consistent with those previously reported.<sup>11</sup>

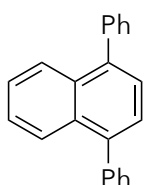

**1,4-Diphenylnaphthalene (9g):** The title compound was prepared according to a modified literature procedure.<sup>8</sup> Pd-P<sup>t</sup>Bu<sub>3</sub>-G4 (7.0 mg, 0.012 mmol, 3 mol %), phenyl boronic acid (49.3 mg, 0.404 mmol, 1.01 equiv), KF (69.7 mg, 1.20 mmol, 3 equiv), and 1-bromo-4-phenylnaphthalene (113.3 mg, 0.40 mmol) were combined in a 1-dram vial equipped with a magnetic stir bar. In rapid succession, deionized water (7.2  $\mu$ L, 0.40 mmol, 1 equiv) and THF (1.0 mL) were added to the vial and the mixture was immediately sparged with nitrogen for ~ 2 min. The vial was sealed with a PTFE-lined cap and the reaction was stirred at room temperature for 24 h. The reaction mixture was extracted with ethyl acetate, and the organic extract was filtered over a plug of celite. The filtrate was concentrated and then purified by flash column chromatography (100% hexanes) to afford **9g** as a white solid (45 mg, 40% yield). Spectral data are consistent with those previously reported.<sup>11</sup>

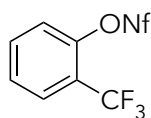

**2-(Trifluoromethyl)phenyl nonaflate (S11).** The title compound was prepared according to a modified literature procedure.<sup>12</sup> To an oven-dried 50 mL round bottom flask was added 2-(trifluoromethyl)phenol (0.68 g, 4.2 mmol, 1 equiv), K<sub>2</sub>CO<sub>3</sub> (0.87 g, 6.3 mmol, 1.5 equiv), and acetonitrile (8.3 mL, 0.5 M). The resulting slurry was stirred rapidly while perfluorobutanesulfonyl fluoride (1.26 g, 5.0 mmol, 1.2 equiv) was added via Pasteur pipette. The solution was allowed to stir at room temperature for 16 h, after which the slurry was filtered over a pad of silica gel and rinsed thoroughly with hexanes. The filtrate was concentrated under vacuum to yield **S11** as a clear, colorless oil (1.39 g, 75% yield). <sup>1</sup>H NMR (600 MHz, CDCl<sub>3</sub>,  $\delta$ ): 7.77 (d,  $J$  = 7.6 Hz, 1H), 7.67 (t,  $J$  = 8.2 Hz, 1H), 7.53 (d,  $J$  = 8.2 Hz, 1H), 7.50 (t,  $J$  = 7.6 Hz, 1H). <sup>13</sup>C{<sup>1</sup>H} NMR (151 MHz, CDCl<sub>3</sub>,  $\delta$ ): 146.4, 134.2, 128.4, 128.2 (q,  $J$  = 5.5 Hz), 123.6 (q,  $J$  = 33.1 Hz), 122.6, 122.2 (q,  $J$  = 272.7 Hz), 117.5, (qt,  $J$  = 295.6, 33.1 Hz), 114.7 (tt,  $J$  = 295.6, 33.1), 110.1 (tqn,  $J$  = 272.7, 31.8 Hz), 108.7 (tsd,  $J$  = 272.7, 31.8, 5.5 Hz). <sup>19</sup>F NMR (282 MHz, CDCl<sub>3</sub>,  $\delta$ ): -60.9, -80.7, -109.3, -120.9, -125.9. HRMS (EI/Q-TOF)  $m/z$ : [M]<sup>+</sup> Calcd for C<sub>11</sub>H<sub>4</sub>F<sub>12</sub>O<sub>3</sub>S<sup>+</sup> 443.9690. Found 443.9686.

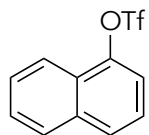

**Naphthalen-1-yl triflate (S12):** The title compound was prepared according to a modified literature procedure.<sup>6</sup> With cooling to 0 °C, trifluoromethanesulfonic anhydride (1.0 mL, 6.0 mmol, 1.2 equiv) was added dropwise to a solution of 1-naphthol (0.72 g, 5.0 mmol) and pyridine (0.81 mL, 10.0 mmol, 2 equiv) in CH<sub>2</sub>Cl<sub>2</sub> (10 mL). The mixture was allowed to warm to room temperature and stirred for 1 h, after which the solution was diluted with Et<sub>2</sub>O and acidified with aqueous 1 N HCl. The layers were separated, and the aqueous layer was washed with Et<sub>2</sub>O (3 x 5 mL). and the combined organics washed with saturated NaHCO<sub>3</sub> and NaCl brine. The combined organic layers were washed with saturated NaHCO<sub>3</sub> and brine (aqueous NaCl), dried over MgSO<sub>4</sub>, filtered, and concentrated to give a yellow oil that was purified through a short silica plug (100% hexanes) to afford **S12** as a clear, colorless oil (1.05 g, 76 % yield). Spectral data are consistent with those previously reported.<sup>7</sup>

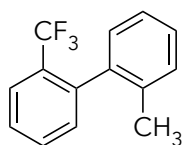

**2-Methyl-2'-(trifluoromethyl)biphenyl (S13).** The title compound was prepared according to a modified literature procedure.<sup>8</sup> Pd-P<sup>t</sup>Bu<sub>3</sub>-G4 (7.0 mg, 0.012 mmol, 3 mol %), *ortho*-tolylboronic acid (54.9 mg, 0.404 mmol, 1.01 equiv), and KF (69.7 mg, 1.20 mmol, 3 equiv) were combined in a 1-dram vial equipped with a magnetic stir bar. In rapid succession, deionized water (7.2 µL, 0.40 mmol, 1 equiv), 2-chlorobenzotrifluoride (54 µL, 0.40 mmol), and toluene (1.0 mL) were added to the vial and the mixture was immediately sparged with nitrogen for ~2 min. The vial was sealed with a PTFE-lined cap and the reaction was stirred at room temperature for 24 h. The reaction mixture was extracted with ethyl acetate, and the organic extract was filtered over a plug of celite. The filtrate was concentrated and then purified by flash column chromatography (100% hexanes) to afford **S13** as a colorless oil (45 mg, 48 % yield). <sup>1</sup>H NMR (500 MHz, CDCl<sub>3</sub>, δ): 7.79 (d, *J* = 7.8 Hz, 1H), 7.59 (dd, *J* = 7.7, 7.7 Hz, 1H), 7.52 (dd, *J* = 7.6, 7.6 Hz, 1H), 7.37-7.23 (multiple signals, 4H, overlaps with solvent), 7.16 (d, *J* = 7.5 Hz, 1H), 2.06 (s, 3H). <sup>13</sup>C{<sup>1</sup>H} NMR (126 MHz, CDCl<sub>3</sub> δ): 140.8, 139.0, 136.1, 131.7, 131.4, 129.7, 129.6, 128.9 (q, <sup>2</sup>*J*<sub>CF</sub> = 29 Hz), 128.0, 127.4, 126.1 (q, <sup>3</sup>*J*<sub>CF</sub> = 5 Hz), 125.0, 124.1 (q, <sup>1</sup>*J*<sub>CF</sub> = 276 Hz), 20.2. <sup>19</sup>F (471 MHz, CDCl<sub>3</sub>, δ): -59.2. HRMS (ESI/Q-TOF) *m/z*: [M+Na]<sup>+</sup> Calcd for C<sub>14</sub>H<sub>11</sub>F<sub>3</sub>Na<sup>+</sup> 259.0705. Found 259.0711.

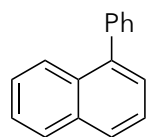

**1-Phenylnaphthalene (S14):** The title compound was prepared according to a modified literature procedure.<sup>8</sup> Pd-P<sup>t</sup>Bu<sub>3</sub>-G4 (7.0 mg, 0.012 mmol, 3 mol %), phenyl boronic acid (49.3 mg, 0.404 mmol, 1.01 equiv), and KF (69.7 mg, 1.20 mmol, 3 equiv) were combined in a 1-dram vial equipped with a magnetic stir bar. In rapid succession, deionized water (7.2 µL, 0.40 mmol, 1 equiv), 1-chloronaphthalene (55 µL, 0.40 mmol, 1 equiv), and THF (1.0 mL) were added to the vial and the mixture was immediately sparged with nitrogen for ~2 min.. The vial was sealed with a PTFE-lined cap and the reaction was stirred at room temperature for 24 h. The reaction mixture was extracted with ethyl acetate, and the organic extract was filtered over a plug of celite. The filtrate was concentrated and then purified by flash column chromatography (100% hexanes) to afford **S14** as a viscous, colorless oil (6 mg, 7% yield). Spectral data are consistent with those previously reported.<sup>13</sup>

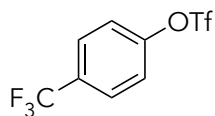

**4-(Trifluoromethyl)phenyl triflate (S15b):** The title compound was prepared according to a modified literature procedure.<sup>14</sup> With cooling to 0 °C, a solution of trifluoromethanesulfonic anhydride (4.0 mL, 24.0 mmol, 1.2 equiv) in CH<sub>2</sub>Cl<sub>2</sub> (10 mL) was added dropwise to a solution of 4-hydroxybenzotrifluoride (3.24 g, 20.0 mmol) and pyridine (3.25 mL, 40.3 mmol, 2 equiv) in CH<sub>2</sub>Cl<sub>2</sub> (20 mL). The mixture was allowed to warm to room temperature and stirred for 1 h, after which the solution was diluted with Et<sub>2</sub>O and acidified with aqueous 1 M HCl. The layers were separated, and the aqueous layer was washed with Et<sub>2</sub>O (3 x 10 mL). The combined organic layers were washed with saturated NaHCO<sub>3</sub> and brine (aqueous NaCl), dried over MgSO<sub>4</sub>, filtered, and concentrated to give a yellow oil that was purified through a short silica plug (100% hexanes) to afford **S15b** as a clear, colorless oil (4.53 g, 77% yield). Spectral data are consistent with those previously reported.<sup>15</sup>

### C. Catalytic Suzuki Couplings of 1

#### 1. Evaluation of Precatalyst and Water Effect on Selectivity

General Procedure with Precatalyst System A: Without exclusion of air or moisture, P<sup>t</sup>Bu<sub>3</sub>-Pd-G4 (1.5 mg, 0.0026 mmol, 3 mol %), *o*-tolyl boronic acid (11.0 mg, 0.081 mmol, 1.01 equiv), and KF (13.9 mg, 0.24 mmol, 3 equiv) were combined in a 1-dram vial equipped with a magnetic stir bar. In rapid succession, water (0–1.4 μL, 0–0.08 mmol, 0–1 equiv), 4-chlorophenyl triflate (14 μL, 0.08 mmol, 1 equiv), and solvent (150 μL) were added to the vial and the mixture was immediately sparged with nitrogen for two minutes. The sparging needle and septum was quickly replaced with a PTFE-lined cap and the reaction was stirred vigorously at room temperature for 24 h. Undecane (7.5 μL) was added to the reaction mixture as an internal standard, and the mixture was diluted with EtOAc. A small aliquot was removed and filtered through celite, and the celite was washed with additional EtOAc. The filtrate was analyzed by gas chromatography.

General Procedure for Precatalyst System B: In a nitrogen filled glovebox, Pd<sub>2</sub>dba<sub>3</sub> (0.5 mg, 0.0006 mmol, 0.75 mol %), Pd(P<sup>t</sup>Bu<sub>3</sub>)<sub>2</sub> (0.6 mg, 0.0012 mmol, 1.5 mol %), *o*-tolyl boronic acid (11.0 mg, 0.081 mmol, 1.01 equiv), and KF (13.9 mg, 0.24 mmol, 3 equiv) were combined in a 1-dram vial equipped with a magnetic stir bar. The vial was sealed with a PTFE-lined cap and removed from the glovebox. Outside of the glovebox, the cap was removed and, in rapid succession, water (0–1.4 μL, 0–0.08 mmol, 0–1 equiv), 4-chlorophenyl triflate (14 μL, 0.08 mmol, 1 equiv), and solvent (150 μL) were added to the vial and the mixture was immediately sparged with nitrogen for two minutes. The sparging needle and septum cap was quickly replaced with a PTFE-lined cap and the reaction was stirred vigorously at room temperature for 24 h. Undecane (7.5 μL) was added to the reaction mixture as an internal standard, and the mixture was diluted with EtOAc. A small aliquot was removed and filtered through celite, and the celite was washed with additional EtOAc. The filtrate was analyzed by gas chromatography.

**Table S1.** Effect of Precatalyst and Water on Selectivity<sup>a</sup>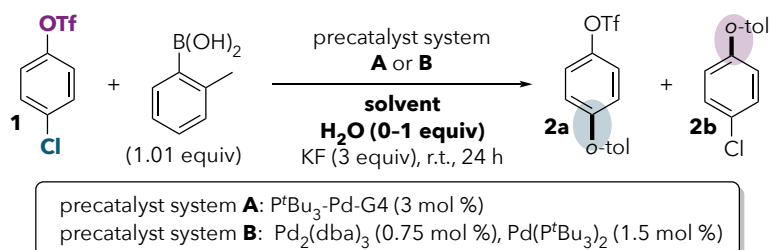

| entry | solvent             | precatalyst | H <sub>2</sub> O (equiv) | trial   | <b>1</b> (%) | <b>2a</b> (%) | <b>2b</b> (%) |
|-------|---------------------|-------------|--------------------------|---------|--------------|---------------|---------------|
| 1     | THF                 | <b>A</b>    | 0                        | 1       | 25           | 79            | 1             |
| 2     | THF                 | <b>A</b>    | 0                        | 2       | 21           | 79            | 1             |
| 3     | THF                 | <b>A</b>    | 0                        | Average | 23           | 79            | 1             |
| 4     | THF                 | <b>A</b>    | 1                        | 1       | 5            | 63            | <1            |
| 5     | THF                 | <b>A</b>    | 1                        | 2       | 23           | 72            | <1            |
| 6     | THF                 | <b>A</b>    | 1                        | 3       | 26           | 68            | 1             |
| 7     | THF                 | <b>A</b>    | 1                        | 4       | 25           | 71            | 1             |
| 8     | THF                 | <b>A</b>    | 1                        | 5       | 27           | 75            | 1             |
| 9     | THF                 | <b>A</b>    | 1                        | 6       | 24           | 79            | 1             |
| 10    | THF                 | <b>A</b>    | 1                        | 7       | 20           | 78            | 1             |
| 11    | THF                 | <b>A</b>    | 1                        | 8       | 18           | 79            | 1             |
| 12    | THF                 | <b>A</b>    | 1                        | Average | 20           | 74            | <1            |
| 13    | THF                 | <b>B</b>    | 1                        | 1       | 28           | 72            | 1             |
| 14    | THF                 | <b>B</b>    | 1                        | 2       | 19           | 75            | 1             |
| 15    | THF                 | <b>B</b>    | 1                        | Average | 24           | 74            | 1             |
| 16    | MeOH                | <b>A</b>    | 1                        | 1       | 0            | 68            | 3             |
| 17    | MeOH                | <b>A</b>    | 1                        | 2       | 0            | 65            | 2             |
| 18    | MeOH                | <b>A</b>    | 1                        | Average | 0            | 67            | 2             |
| 19    | MeOH                | <b>B</b>    | 1                        | 1       | 35           | 19            | 2             |
| 20    | MeOH                | <b>B</b>    | 1                        | 2       | 36           | 21            | 2             |
| 21    | MeOH                | <b>B</b>    | 1                        | Average | 35           | 19            | 2             |
| 22    | DMF                 | <b>A</b>    | 0                        | 1       | 65           | 6             | 30            |
| 23    | DMF                 | <b>A</b>    | 0                        | 2       | 63           | 7             | 31            |
| 24    | DMF                 | <b>A</b>    | 0                        | Average | 64           | 7             | 30            |
| 25    | DMF                 | <b>A</b>    | 1                        | 1       | 16           | 9             | 58            |
| 26    | DMF                 | <b>A</b>    | 1                        | 2       | 19           | 9             | 61            |
| 27    | DMF                 | <b>A</b>    | 1                        | 3       | 24           | 11            | 59            |
| 28    | DMF                 | <b>A</b>    | 1                        | 4       | 26           | 11            | 59            |
| 29    | DMF                 | <b>A</b>    | 1                        | 5       | 16           | 12            | 66            |
| 30    | DMF                 | <b>A</b>    | 1                        | 6       | 20           | 11            | 62            |
| 31    | DMF                 | <b>A</b>    | 1                        | 7       | 18           | 9             | 66            |
| 32    | DMF                 | <b>A</b>    | 1                        | 8       | 46           | 7             | 46            |
| 33    | DMF                 | <b>A</b>    | 1                        | Average | 23           | 10            | 60            |
| 34    | DMF                 | <b>B</b>    | 1                        | 1       | 49           | 7             | 42            |
| 35    | DMF                 | <b>B</b>    | 1                        | 2       | 23           | 10            | 62            |
| 36    | DMF                 | <b>B</b>    | 1                        | Average | 36           | 9             | 52            |
| 37    | MeCN                | <b>A</b>    | 1                        | 1       | 8            | 2             | 75            |
| 38    | MeCN                | <b>A</b>    | 1                        | 2       | 8            | 2             | 78            |
| 39    | MeCN                | <b>A</b>    | 1                        | Average | 8            | 2             | 77            |
| 40    | MeCN                | <b>B</b>    | 1                        | 1       | 16           | 4             | 72            |
| 41    | MeCN                | <b>B</b>    | 1                        | 2       | 19           | 4             | 71            |
| 42    | MeCN                | <b>B</b>    | 1                        | Average | 17           | 4             | 72            |
| 43    | propylene carbonate | <b>A</b>    | 1                        | 1       | 9            | 57            | 6             |

|    |                     |          |   |         |    |    |   |
|----|---------------------|----------|---|---------|----|----|---|
| 44 | propylene carbonate | <b>A</b> | 1 | 2       | 23 | 68 | 6 |
| 45 | propylene carbonate | <b>A</b> | 1 | 3       | 12 | 75 | 5 |
| 46 | propylene carbonate | <b>A</b> | 1 | 4       | 19 | 68 | 6 |
| 47 | propylene carbonate | <b>A</b> | 1 | Average | 16 | 67 | 6 |
| 48 | propylene carbonate | <b>B</b> | 1 | 1       | 22 | 52 | 6 |
| 49 | propylene carbonate | <b>B</b> | 1 | 2       | 20 | 55 | 5 |
| 50 | propylene carbonate | <b>B</b> | 1 | Average | 21 | 53 | 6 |

<sup>a</sup>GC yields calibrated against undecane as an internal standard. Diarylated product observed in ≤5% yield in all cases.

**Discussion:** The addition of 1 equiv water does not significantly impact selectivity (compare entries 3 vs 12, and 24 vs 33). Precatalyst systems **A** and **B** provide very similar selectivity in all solvents examined, although in some cases precatalyst **A** affords somewhat higher yields. Precatalyst **A** has the added advantage that it can be handled open to air.

## 2. Benzonitrile Additives (Table 1 and Figure 1)

**General Procedure:** Without exclusion of air or moisture, P<sup>t</sup>Bu<sub>3</sub>-Pd-G4 (1.5 mg, 0.0026 mmol, 3 mol %), *o*-tolyl boronic acid (11.0 mg, 0.081 mmol, 1.01 equiv), and KF (13.9 mg, 0.24 mmol, 3 equiv) were combined in a 1-dram vial equipped with a magnetic stir bar. In rapid succession, water (1.4 μL, 0.08 mmol, 1 equiv), 4-chlorophenyl triflate (14 μL, 0.08 mmol, 1 equiv), benzonitrile additive (0.04 mmol, 0.5 equiv, if applicable), and solvent (usually THF, 150 μL) were added to the vial and the mixture was immediately sparged with nitrogen for two minutes. The sparging needle and septum was quickly replaced with a PTFE-lined cap and the reaction was stirred vigorously at room temperature for 24 h. Undecane (7.5 μL) was added to the reaction mixture as an internal standard, and the mixture was diluted with EtOAc. A small aliquot was removed and filtered through celite, and the celite was washed with additional EtOAc. The filtrate was analyzed by gas chromatography.

**Table S2.** Effect of Benzonitrile Additives on Selectivity<sup>a</sup>

| entry          | X                | $\sigma_p$ | $\sigma_p^+$ | trial   | <b>1</b> (%) | <b>2a</b> (%) | <b>2b</b> (%) | log ( <b>2a/2b</b> ) | std. dev. <sup>b</sup> |
|----------------|------------------|------------|--------------|---------|--------------|---------------|---------------|----------------------|------------------------|
| 1 <sup>c</sup> | --               | --         | --           | 1       | 5            | 63            | <1            | >1.80                |                        |
| 2 <sup>c</sup> | --               | --         | --           | 2       | 23           | 72            | <1            | >1.86                |                        |
| 3 <sup>c</sup> | --               | --         | --           | 3       | 26           | 68            | 1             | 1.83                 |                        |
| 4 <sup>c</sup> | --               | --         | --           | 4       | 25           | 71            | 1             | 1.85                 |                        |
| 5 <sup>c</sup> | --               | --         | --           | 5       | 27           | 75            | 1             | 1.88                 |                        |
| 6 <sup>c</sup> | --               | --         | --           | 6       | 24           | 79            | 1             | 1.90                 |                        |
| 7 <sup>c</sup> | --               | --         | --           | 7       | 20           | 78            | 1             | 1.89                 |                        |
| 8 <sup>c</sup> | --               | --         | --           | 8       | 18           | 79            | 1             | 1.90                 |                        |
| 9 <sup>c</sup> | --               | --         | --           | Average | 20           | 74            | <1            | >1.87                | 0.03                   |
| 10             | NMe <sub>2</sub> | -0.83      | -1.70        | 1       | 46           | 28            | 15            | 0.27                 |                        |
| 11             | NMe <sub>2</sub> | -0.83      | -1.70        | 2       | 47           | 29            | 20            | 0.16                 |                        |
| 12             | NMe <sub>2</sub> | -0.83      | -1.70        | 3       | 37           | 36            | 21            | 0.23                 |                        |

|                 |       |       |       |         |    |    |    |       |      |
|-----------------|-------|-------|-------|---------|----|----|----|-------|------|
| 13              | NMe2  | -0.83 | -1.70 | Average | 44 | 31 | 18 | 0.24  | 0.06 |
| 14              | NH2   | -0.66 | -1.30 | 1       | 29 | 46 | 19 | 0.38  |      |
| 15              | NH2   | -0.66 | -1.30 | 2       | 29 | 45 | 20 | 0.35  |      |
| 16              | NH2   | -0.66 | -1.30 | 3       | 36 | 43 | 17 | 0.40  |      |
| 17              | NH2   | -0.66 | -1.30 | Average | 31 | 45 | 19 | 0.37  | 0.03 |
| 18              | OH    | -0.37 | -0.92 | 1       | 38 | 50 | 16 | 0.49  |      |
| 19              | OH    | -0.37 | -0.92 | 2       | 28 | 53 | 14 | 0.58  |      |
| 20              | OH    | -0.37 | -0.92 | 3       | 33 | 46 | 16 | 0.46  |      |
| 21              | OH    | -0.37 | -0.92 | Average | 33 | 50 | 15 | 0.52  | 0.06 |
| 22              | OEt   | -0.24 | -0.81 | 1       | 35 | 47 | 10 | 0.67  |      |
| 23              | OEt   | -0.24 | -0.81 | 2       | 41 | 45 | 8  | 0.75  |      |
| 24              | OEt   | -0.24 | -0.81 | 3       | 48 | 42 | 10 | 0.62  |      |
| 25              | OEt   | -0.24 | -0.81 | Average | 42 | 45 | 10 | 0.65  | 0.06 |
| 26              | OMe   | -0.27 | -0.73 | 1       | 72 | 26 | 3  | 0.94  |      |
| 27              | OMe   | -0.27 | -0.73 | 2       | 56 | 18 | 2  | 0.95  |      |
| 28              | OMe   | -0.27 | -0.73 | 3       | 62 | 32 | 4  | 0.90  |      |
| 29              | OMe   | -0.27 | -0.73 | Average | 63 | 26 | 3  | 0.94  | 0.03 |
| 30              | Me    | -0.17 | -0.31 | 1       | 65 | 35 | 2  | 1.24  |      |
| 31              | Me    | -0.17 | -0.31 | 2       | 66 | 25 | 2  | 1.10  |      |
| 32              | Me    | -0.17 | -0.31 | 3       | 69 | 28 | 2  | 1.15  |      |
| 33              | Me    | -0.17 | -0.31 | Average | 67 | 29 | 2  | 1.16  | 0.07 |
| 34              | F     | 0.06  | -0.07 | 1       | 40 | 51 | 5  | 1.01  |      |
| 35              | F     | 0.06  | -0.07 | 2       | 71 | 30 | 2  | 1.18  |      |
| 36              | F     | 0.06  | -0.07 | 3       | 46 | 50 | 5  | 1.00  |      |
| 37              | F     | 0.06  | -0.07 | Average | 52 | 44 | 4  | 1.04  | 0.10 |
| 38              | H     | 0     | 0     | 1       | 37 | 53 | 3  | 1.25  |      |
| 39              | H     | 0     | 0     | 2       | 43 | 53 | 6  | 0.95  |      |
| 40              | H     | 0     | 0     | 3       | 38 | 59 | 3  | 1.29  |      |
| 41              | H     | 0     | 0     | Average | 39 | 55 | 4  | 1.14  | 0.19 |
| 42              | COOMe | 0.45  | 0.49  | 1       | 56 | 41 | 3  | 1.14  |      |
| 43              | COOMe | 0.45  | 0.49  | 2       | 55 | 44 | 3  | 1.17  |      |
| 44              | COOMe | 0.45  | 0.49  | 3       | 55 | 41 | 3  | 1.14  |      |
| 45              | COOMe | 0.45  | 0.49  | Average | 55 | 42 | 3  | 1.15  | 0.02 |
| 46              | CF3   | 0.54  | 0.61  | 1       | 44 | 45 | 3  | 1.18  |      |
| 47              | CF3   | 0.54  | 0.61  | 2       | 46 | 49 | 3  | 1.21  |      |
| 48              | CF3   | 0.54  | 0.61  | 3       | 49 | 44 | 3  | 1.17  |      |
| 49              | CF3   | 0.54  | 0.61  | Average | 46 | 46 | 3  | 1.19  | 0.02 |
| 50              | NO2   | 0.78  | 0.79  | 1       | 63 | 32 | 8  | 0.60  |      |
| 51              | NO2   | 0.78  | 0.79  | 2       | 49 | 38 | 8  | 0.68  |      |
| 52              | NO2   | 0.78  | 0.79  | 3       | 59 | 35 | 6  | 0.77  |      |
| 53              | NO2   | 0.78  | 0.79  | Average | 57 | 35 | 7  | 0.70  | 0.08 |
| 54 <sup>d</sup> | --    | --    | --    | 1       | 27 | 7  | 54 | -0.89 |      |
| 55 <sup>d</sup> | --    | --    | --    | 2       | 26 | 7  | 53 | -0.88 |      |
| 56 <sup>d</sup> | --    | --    | --    | Average | 27 | 7  | 53 | -0.88 | 0.01 |

<sup>a</sup>GC yields calibrated against undecane as an internal standard. Diarylated product observed in  $\leq 5\%$  yield in all cases. Sigma values from reference 16. <sup>b</sup>Standard deviation of the log(**2a/2b**) values. <sup>c</sup>No benzonitrile derivatives were added. <sup>d</sup>PhCN was used as the reaction solvent (no additional benzonitrile derivatives were added).

**Discussion:** Table S2 entries 10-49 were used to create Figure 1 in the manuscript, which shows a good correlation between  $\sigma_p^+$  and log(**2a/2b**), with an  $R^2$  value of 0.8639. The correlation to  $\sigma_p$  is not quite as strong (Figure S1). Unusual results were observed with 4-nitrobenzonitrile (entry 53). With this additive, the **2a/2b** ratio was much smaller than expected based on the trend with all of the other substituted benzonitriles (Figure S2). This particularly electron-poor nitrile is expected to coordinate to Pd(o) as a  $\pi$ -acceptor, and we speculate that the increased reaction

at OTf may be due to this coordination mode. There is no evidence that nitro groups in isolation promote reaction at triflate. For example, high selectivity for reaction at chloride is observed in the catalytic Suzuki coupling using 3-nitrophenylboronic acid in MeOH and THF,<sup>8</sup> and running the reaction shown in Table S2 with PhNO<sub>2</sub> as the solvent leads exclusively to product **2a** from reaction at chloride.

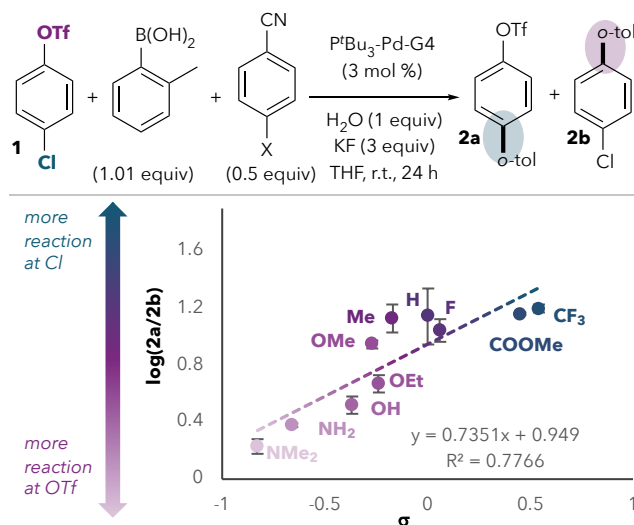

**Figure S1.** Hammett-type plot using  $\sigma$  shows slightly worse correlation than the plot using  $\sigma^+$ .

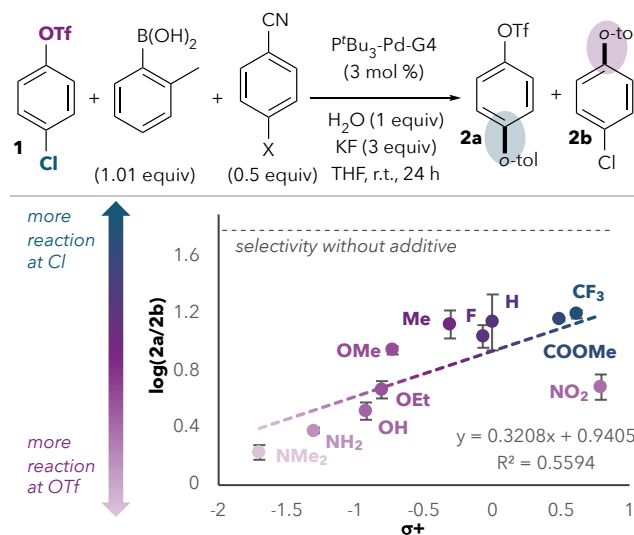

**Figure S2.** NO<sub>2</sub> is an outlier in the Hammett-type plot correlating benzonitrile donor ability and increased reaction at triflate.

### 3. Mixed THF/Benzonitrile Solvent

**General Procedure:** Without exclusion of air or moisture,  $\text{P}^t\text{Bu}_3\text{-Pd-G4}$  (1.5 mg, 0.0026 mmol, 3 mol %), *o*-tolyl boronic acid (11.0 mg, 0.081 mmol, 1.01 equiv), and KF (13.9 mg, 0.24 mmol, 3 equiv) were combined in a 1-dram vial equipped with a magnetic stir bar. In rapid succession, water (1.4  $\mu\text{L}$ , 0.08 mmol, 1 equiv), 4-chlorophenyl triflate (14  $\mu\text{L}$ , 0.08 mmol, 1 equiv), and solvent(s) (total of 150  $\mu\text{L}$ ) were added to the vial and the mixture was immediately sparged with nitrogen for two minutes. The sparging needle and septum was quickly replaced with a PTFE-lined cap and the reaction was stirred vigorously at room temperature for 24 h. Undecane (7.5  $\mu\text{L}$ ) was added to the reaction mixture as an internal standard, and the mixture was diluted with EtOAc. A small aliquot was removed and filtered through celite, and the celite was washed with additional EtOAc. The filtrate was analyzed by gas chromatography.

**Table S3.** Effect of Mixed PhCN/THF Solvent on Selectivity<sup>a</sup>

| PhCN (% of total solvent volume) | THF (% of total solvent volume) | trial   | <b>1</b> (%) | <b>2a</b> (%) | <b>2b</b> (%) | total yield<br><b>2a + 2b</b> | ratio <b>2a : 2b</b> |
|----------------------------------|---------------------------------|---------|--------------|---------------|---------------|-------------------------------|----------------------|
| 0                                | 100                             | 1       | 5            | 63            | <1            | 63                            | >63 : 1              |
| 0                                | 100                             | 2       | 23           | 72            | <1            | 72                            | >72 : 1              |
| 0                                | 100                             | 3       | 26           | 68            | 1             | 69                            | 68 : 1               |
| 0                                | 100                             | 4       | 25           | 71            | 1             | 72                            | 71 : 1               |
| 0                                | 100                             | 5       | 27           | 75            | 1             | 76                            | 75 : 1               |
| 0                                | 100                             | 6       | 24           | 79            | 1             | 80                            | 79 : 1               |
| 0                                | 100                             | 7       | 20           | 78            | 1             | 79                            | 78 : 1               |
| 0                                | 100                             | 8       | 18           | 79            | 1             | 80                            | 79 : 1               |
| 0                                | 100                             | average | 21           | 74            | 1             | 75                            | 74 : 1               |
| 1                                | 99                              | 1       | 33           | 56            | 2             | 58                            | 28 : 1               |
| 1                                | 99                              | 2       | 19           | 74            | 2             | 76                            | 37 : 1               |
| 1                                | 99                              | average | 26           | 65            | 2             | 67                            | 33 : 1               |
| 5                                | 95                              | 1       | 58           | 30            | 6             | 36                            | 5 : 1                |
| 5                                | 95                              | 2       | 45           | 41            | 9             | 50                            | 5 : 1                |
| 5                                | 95                              | average | 51           | 35            | 7             | 43                            | 5 : 1                |
| 10                               | 90                              | 1       | 39           | 33            | 17            | 50                            | 2 : 1                |
| 10                               | 90                              | 2       | 38           | 36            | 19            | 55                            | 2 : 1                |
| 10                               | 90                              | average | 39           | 35            | 18            | 53                            | 2 : 1                |
| 25                               | 75                              | 1       | 26           | 25            | 38            | 63                            | 1 : 2                |
| 25                               | 75                              | 2       | 21           | 26            | 38            | 64                            | 1 : 2                |
| 25                               | 75                              | average | 24           | 25            | 38            | 63                            | 1 : 2                |
| 50                               | 50                              | 1       | 13           | 15            | 48            | 63                            | 1 : 3                |
| 50                               | 50                              | 2       | 17           | 13            | 52            | 65                            | 1 : 4                |
| 50                               | 50                              | average | 15           | 14            | 50            | 64                            | 1 : 4                |
| 75                               | 25                              | 1       | 18           | 12            | 56            | 68                            | 1 : 5                |
| 75                               | 25                              | 2       | 27           | 10            | 44            | 54                            | 1 : 4                |
| 75                               | 25                              | average | 22           | 11            | 50            | 61                            | 1 : 5                |
| 100                              | 0                               | 1       | 27           | 7             | 54            | 61                            | 1 : 8                |
| 100                              | 0                               | 2       | 26           | 7             | 53            | 60                            | 1 : 8                |
| 100                              | 0                               | average | 27           | 7             | 53            | 60                            | 1 : 8                |

<sup>a</sup>GC yields calibrated against undecane as an internal standard.

**Discussion:** The data in Table S3 show that selectivity inverts between 10-25% PhCN, as illustrated in Figure S3. Interestingly, small amounts of PhCN (5% and 10% of total volume) lead to lower conversion than observed in neat THF or with larger amounts of PhCN ( $\geq 25\%$  of total volume). This phenomenon is illustrated in Figure S4. The unusual shape of the curve in Figure S4 may relate to solvent polarity. Small quantities of PhCN begin to suppress reaction at chloride because Pd is more likely to be bisligated. Reaction at triflate increases with small quantities of PhCN, but it increases even more with larger quantities of PhCN because of increased polarity of the reaction medium. Aryl triflates are known to undergo faster oxidative addition at bisligated palladium in more polar media.<sup>17</sup>

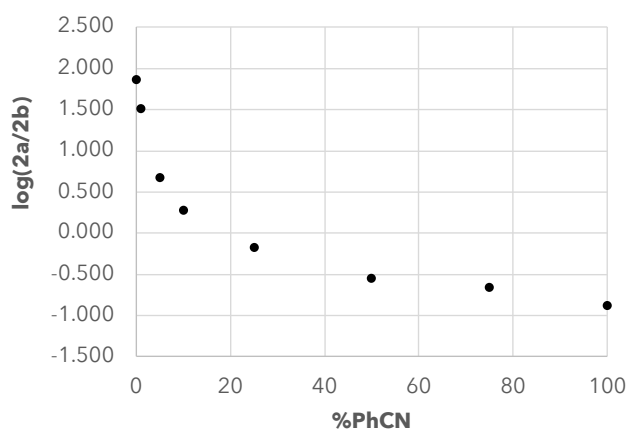

**Figure S3.** Effect of PhCN/THF ratio on product ratio.

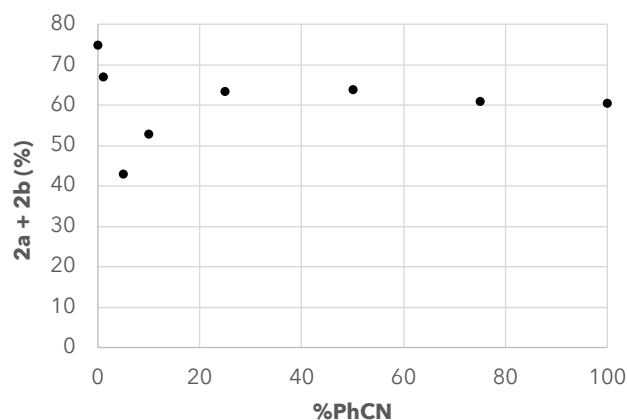

**Figure S4.** Effect of PhCN/THF ratio on the total yield of **2a** + **2b**.

#### 4. Results with Fluoroacetonitrile, Sulfolane (Table 2), and Tetrahydrothiophene

**General Procedure:** Without exclusion of air or moisture,  $\text{P}^t\text{Bu}_3\text{-Pd-G4}$  (1.5 mg, 0.0026 mmol, 3 mol %), *o*-tolyl boronic acid (11.0 mg, 0.081 mmol, 1.01 equiv), and KF (13.9 mg, 0.24 mmol, 3 equiv) were combined in a 1-dram vial equipped with a magnetic stir bar. In rapid succession, water (1.4  $\mu\text{L}$ , 0.08 mmol, 1 equiv), 4-chlorophenyl triflate (14  $\mu\text{L}$ , 0.08 mmol, 1 equiv), and solvent (150  $\mu\text{L}$ ) were added to the vial and the mixture was immediately sparged with nitrogen for two minutes. The sparging needle and septum was quickly replaced with a PTFE-lined cap and the reaction was stirred vigorously at room temperature for 24 h. Undecane (7.5  $\mu\text{L}$ ) was added to the reaction mixture as an internal standard, and the mixture was diluted with EtOAc. A small aliquot was removed and filtered through celite, and the celite was washed with additional EtOAc. The filtrate was analyzed by gas chromatography.

**Table S4.** Modifying the Coordinating Ability of Common Solvents Leads to Changes in Selectivity<sup>a</sup>

| entry | solvent             | $\epsilon^b$ | trial   | <b>1</b> (%) | <b>2a</b> (%) | <b>2b</b> (%) |
|-------|---------------------|--------------|---------|--------------|---------------|---------------|
| 1     | CH <sub>3</sub> CN  | 36.6         | 1       | 8            | 2             | 75            |
| 2     | CH <sub>3</sub> CN  | 36.6         | 2       | 8            | 2             | 78            |
| 3     | CH <sub>3</sub> CN  | 36.6         | Average | 8            | 2             | 77            |
| 4     | CH <sub>2</sub> FCN | ~36          | 1       | 85           | 4             | 10            |
| 5     | CH <sub>2</sub> FCN | ~36          | 2       | 88           | 3             | 9             |
| 6     | CH <sub>2</sub> FCN | ~36          | Average | 86           | 4             | 10            |
| 7     | DMSO                | 47.2         | 1       | 61           | 1             | 26            |
| 8     | DMSO                | 47.2         | 2       | 25           | 1             | 64            |
| 9     | DMSO                | 47.2         | Average | 43           | 1             | 45            |
| 10    | sulfolane           | 42.2         | 1       | 41           | 44            | 12            |
| 11    | sulfolane           | 42.2         | 2       | 41           | 43            | 10            |
| 12    | sulfolane           | 42.2         | Average | 41           | 44            | 11            |
| 13    | THF                 | 7.5          | 1       | 5            | 63            | <1            |
| 14    | THF                 | 7.5          | 2       | 23           | 72            | <1            |
| 15    | THF                 | 7.5          | 3       | 26           | 68            | 1             |
| 16    | THF                 | 7.5          | 4       | 25           | 71            | 1             |
| 17    | THF                 | 7.5          | 5       | 27           | 75            | 1             |
| 18    | THF                 | 7.5          | 6       | 24           | 79            | 1             |
| 19    | THF                 | 7.5          | 7       | 20           | 78            | 1             |
| 20    | THF                 | 7.5          | 8       | 18           | 79            | 1             |
| 21    | THF                 | 7.5          | Average | 20           | 74            | <1            |
| 22    | tetrahydrothiophene | 8.6          | 1       | 92           | 0             | 2             |
| 23    | tetrahydrothiophene | 8.6          | 2       | 105          | 0             | 1             |
| 24    | tetrahydrothiophene | 8.6          | Average | 99           | 0             | 2             |

<sup>a</sup>GC yields calibrated against undecane as an internal standard. Results are the average of at least two trials. Diarylated product observed in  $\leq 3\%$  yield in all cases. <sup>b</sup>Dielectric constants from references 18 and 19.

**Discussion:** Although reaction in THF provides **2a** as the major product (Table S4, entry 21), the only product observed in tetrahydrothiophene (THT) is **2b** (entry 24). This is consistent with THT acting as a coordinating ligand during oxidative addition. However the yield is so low that selectivity cannot be reliably interpreted. The low yield is likely due to the strong coordinating ability of sulfides to palladium, effectively poisoning it as a catalyst. For a discussion of entries 1-12, see the manuscript.

### 5. Effect of Temperature (Table 4)

**General Procedure with Precatalyst System A:** Without exclusion of air or moisture,  $\text{P}^t\text{Bu}_3\text{-Pd-G4}$  (1.5 mg, 0.0026 mmol, 3 mol %), *o*-tolyl boronic acid (11.0 mg, 0.081 mmol, 1.01 equiv), and KF (13.9 mg, 0.24 mmol, 3 equiv) were combined in a 1-dram vial equipped with a magnetic stir bar. In rapid succession, water (1.4  $\mu\text{L}$ , 0.08 mmol, 1 equiv), 4-chlorophenyl triflate (14  $\mu\text{L}$ , 0.08 mmol, 1 equiv), and solvent (150  $\mu\text{L}$ ) were added to the vial and the mixture was immediately sparged with nitrogen for two minutes. The sparging needle and septum was quickly replaced with a PTFE-lined cap and the reaction was stirred vigorously at the indicated temperature for 24 h. Undecane (7.5  $\mu\text{L}$ ) was added to the reaction mixture as an internal standard, and the mixture was diluted with EtOAc. A small aliquot was removed and filtered through celite, and the celite was washed with additional EtOAc. The filtrate was analyzed by gas chromatography.

**General Procedure for Precatalyst Systems B-E:** In a nitrogen filled glovebox, the following reagents were combined with *o*-tolyl boronic acid (11.0 mg, 0.081 mmol, 1.01 equiv) and KF (13.9 mg, 0.24 mmol, 3 equiv) in a 1-dram vial equipped with a magnetic stir bar:

Precatalyst System B:  $\text{Pd}_2\text{dba}_3$  (0.5 mg, 0.0006 mmol, 0.75 mol %),  $\text{Pd}(\text{P}^t\text{Bu}_3)_2$  (0.6 mg, 0.0012 mmol, 1.5 mol %)

Precatalyst System C:  $\text{Pd}_2\text{dba}_3$  (1.1 mg, 0.0012 mmol, 1.5 mol %),  $\text{P}^t\text{Bu}_3$  (0.5 mg, 0.0024 mmol, 3.0 mol %)

Precatalyst System D:  $\text{Pd}(\text{OAc})_2$  (0.7 mg, 0.0024 mmol, 3.0 mol %),  $\text{P}^t\text{Bu}_3$  (0.5 mg, 0.0024 mmol, 3.0 mol %)

Precatalyst System E:  $\text{Pd}(\text{COD})(\text{CH}_2\text{TMS})_2$  (0.9 mg, 0.0024 mmol, 3.0 mol %),  $\text{P}^t\text{Bu}_3$  (0.5 mg, 0.0024 mmol, 3.0 mol %)

The vial was sealed with a PTFE-lined cap and removed from the glovebox. Outside of the glovebox, the cap was removed and, in rapid succession, water (1.4  $\mu\text{L}$ , 0.08 mmol, 1 equiv), 4-chlorophenyl triflate (14  $\mu\text{L}$ , 0.08 mmol, 1 equiv), and solvent (150  $\mu\text{L}$ ) were added to the vial and the mixture was immediately sparged with nitrogen for two minutes. The sparging needle and septum was quickly replaced with a PTFE-lined cap and the reaction was stirred vigorously at the indicated temperature for 24 h. Undecane (7.5  $\mu\text{L}$ ) was added to the reaction mixture as an internal standard, and the mixture was diluted with EtOAc. A small aliquot was removed and filtered through celite, and the celite was washed with additional EtOAc. The filtrate was analyzed by gas chromatography.

**Table S5.** Effect of Reaction Temperature of Suzuki Selectivity<sup>a</sup>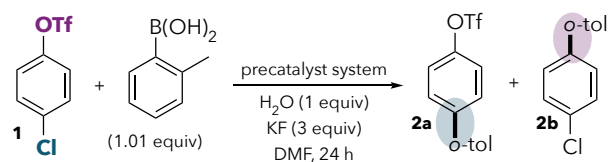

precatalyst system **A**:  $\text{P}^t\text{Bu}_3\text{-Pd-G4}$  (3 mol %)  
 precatalyst system **B**:  $\text{Pd}_2(\text{dba})_3$  (0.75 mol %),  $\text{Pd}(\text{P}^t\text{Bu}_3)_2$  (1.5 mol %)  
 precatalyst system **C**:  $\text{Pd}_2(\text{dba})_3$  (1.5 mol %),  $\text{P}^t\text{Bu}_3$  (3 mol %)  
 precatalyst system **D**:  $\text{Pd}(\text{OAc})_2$  (3 mol %),  $\text{P}^t\text{Bu}_3$  (3 mol %)  
 precatalyst system **E**:  $\text{Pd}(\text{COD})(\text{CH}_2\text{TMS})_2$  (3 mol %),  $\text{P}^t\text{Bu}_3$  (3 mol %)

| entry | solvent | precatalyst | temperature | trial   | <b>1</b> (%) | <b>2a</b> (%) | <b>2b</b> (%) | $\Delta\Delta G^\ddagger$ |
|-------|---------|-------------|-------------|---------|--------------|---------------|---------------|---------------------------|
| 1     | THF     | <b>A</b>    | r.t.        | 1       | 5            | 63            | <1            | >2.4                      |
| 2     | THF     | <b>A</b>    | r.t.        | 2       | 23           | 72            | <1            | >2.5                      |
| 3     | THF     | <b>A</b>    | r.t.        | 3       | 26           | 68            | 1             | 2.5                       |
| 4     | THF     | <b>A</b>    | r.t.        | 4       | 25           | 71            | 1             | 2.5                       |
| 5     | THF     | <b>A</b>    | r.t.        | 5       | 27           | 75            | 1             | 2.6                       |
| 6     | THF     | <b>A</b>    | r.t.        | 6       | 24           | 79            | 1             | 2.6                       |
| 7     | THF     | <b>A</b>    | r.t.        | 7       | 20           | 78            | 1             | 2.6                       |
| 8     | THF     | <b>A</b>    | r.t.        | 8       | 18           | 79            | 1             | 2.6                       |
| 9     | THF     | <b>A</b>    | r.t.        | Average | 20           | 74            | <1            | >2.5                      |
| 10    | THF     | <b>A</b>    | 100 °C      | 1       | 9            | 77            | 0             | >2.6                      |
| 11    | THF     | <b>A</b>    | 100 °C      | 2       | 10           | 87            | 1             | 2.6                       |
| 12    | THF     | <b>A</b>    | 100 °C      | Average | 10           | 82            | <1            | >2.6                      |
| 13    | THF     | <b>B</b>    | r.t.        | 1       | 17           | 79            | 1             | 2.6                       |
| 14    | THF     | <b>B</b>    | r.t.        | 2       | 16           | 78            | 0             | 2.6                       |
| 15    | THF     | <b>B</b>    | r.t.        | Average | 17           | 79            | 1             | 2.6                       |
| 16    | THF     | <b>B</b>    | 100 °C      | 1       | 7            | 75            | <1            | >2.6                      |
| 17    | THF     | <b>B</b>    | 100 °C      | 2       | 5            | 72            | <1            | >2.5                      |
| 18    | THF     | <b>B</b>    | 100 °C      | Average | 6            | 73            | <1            | >2.5                      |
| 19    | DMF     | <b>A</b>    | r.t.        | 1       | 16           | 9             | 58            | -1.1                      |
| 20    | DMF     | <b>A</b>    | r.t.        | 2       | 19           | 9             | 61            | -1.1                      |
| 21    | DMF     | <b>A</b>    | r.t.        | 3       | 24           | 11            | 59            | -1.0                      |
| 22    | DMF     | <b>A</b>    | r.t.        | 4       | 26           | 11            | 59            | -1.0                      |
| 23    | DMF     | <b>A</b>    | r.t.        | 5       | 16           | 12            | 66            | -1.0                      |
| 24    | DMF     | <b>A</b>    | r.t.        | 6       | 20           | 11            | 62            | -1.0                      |
| 25    | DMF     | <b>A</b>    | r.t.        | 7       | 18           | 9             | 66            | -1.2                      |
| 26    | DMF     | <b>A</b>    | r.t.        | 8       | 46           | 7             | 46            | -1.1                      |
| 27    | DMF     | <b>A</b>    | r.t.        | Average | 23           | 10            | 60            | -1.1                      |
| 28    | DMF     | <b>A</b>    | 100 °C      | 1       | 2            | 24            | 29            | -0.1                      |
| 29    | DMF     | <b>A</b>    | 100 °C      | 2       | 3            | 19            | 31            | -0.3                      |
| 30    | DMF     | <b>A</b>    | 100 °C      | Average | 2            | 21            | 30            | -0.2                      |
| 31    | DMF     | <b>B</b>    | r.t.        | 1       | 17           | 11            | 67            | -1.1                      |
| 32    | DMF     | <b>B</b>    | r.t.        | 2       | 17           | 11            | 67            | -1.1                      |
| 33    | DMF     | <b>B</b>    | r.t.        | Average | 17           | 11            | 67            | -1.1                      |
| 34    | DMF     | <b>B</b>    | 100 °C      | 1       | 6            | 33            | 24            | 0.2                       |
| 35    | DMF     | <b>B</b>    | 100 °C      | 2       | 9            | 34            | 22            | 0.3                       |
| 36    | DMF     | <b>B</b>    | 100 °C      | Average | 7            | 33            | 23            | 0.2                       |
| 37    | DMF     | <b>C</b>    | r.t.        | 1       | 101          | 0             | 1             | --                        |
| 38    | DMF     | <b>C</b>    | r.t.        | 2       | 75           | 3             | 23            | -1.2                      |

|    |     |          |        |         |    |    |    |      |
|----|-----|----------|--------|---------|----|----|----|------|
| 39 | DMF | <b>C</b> | r.t.   | Average | 88 | 2  | 12 | -1.1 |
| 40 | DMF | <b>C</b> | 100 °C | 1       | 10 | 38 | 19 | 0.4  |
| 41 | DMF | <b>C</b> | 100 °C | 2       | 42 | 30 | 19 | 0.3  |
| 42 | DMF | <b>C</b> | 100 °C | Average | 26 | 34 | 19 | 0.3  |
| 43 | DMF | <b>D</b> | r.t.   | 1       | 48 | 1  | 42 | -2.2 |
| 44 | DMF | <b>D</b> | r.t.   | 2       | 39 | 7  | 44 | -1.1 |
| 45 | DMF | <b>D</b> | r.t.   | Average | 44 | 4  | 43 | -1.4 |
| 46 | DMF | <b>D</b> | 100 °C | 1       | 12 | 20 | 18 | 0.1  |
| 47 | DMF | <b>D</b> | 100 °C | 2       | 11 | 8  | 14 | -0.3 |
| 48 | DMF | <b>D</b> | 100 °C | Average | 11 | 14 | 16 | -0.1 |
| 49 | DMF | <b>E</b> | r.t.   | 1       | 60 | 4  | 33 | -1.2 |
| 50 | DMF | <b>E</b> | r.t.   | 2       | 39 | 6  | 47 | -1.2 |
| 51 | DMF | <b>E</b> | r.t.   | Average | 50 | 5  | 40 | -1.2 |
| 52 | DMF | <b>E</b> | 100 °C | 1       | 9  | 26 | 20 | 0.2  |
| 53 | DMF | <b>E</b> | 100 °C | 2       | 9  | 38 | 20 | 0.4  |
| 54 | DMF | <b>E</b> | 100 °C | Average | 9  | 32 | 20 | 0.3  |

<sup>a</sup>GC yields calibrated against undecane as an internal standard. <sup>b</sup>Calculated difference in activation barriers to forming products (**2b** – **2a**) based on  $\Delta\Delta G^\ddagger = RT\ln(\mathbf{2a}/\mathbf{2b})$ .

**Discussion:** In DMF, more reaction at chloride is observed at 100 °C compared to room temperature. However, the 100 °C product ratios vary somewhat depending on precatalyst source. This difference is most prominent for precatalyst system **A** compared to the other precatalyst systems. As shown in Table S6, the change in  $\Delta\Delta G^\ddagger$  when going from room temperature to 100 °C is smaller for this system than for the other systems.

**Table S6.** Effect of Reaction Temperature of Suzuki Selectivity<sup>a</sup>

| precatalyst | $\Delta\Delta G_{(\mathbf{2b}-\mathbf{2a})}^\ddagger$ at r.t. | $\Delta\Delta G_{(\mathbf{2b}-\mathbf{2a})}^\ddagger$ at 100 °C | change in $\Delta\Delta G^\ddagger$ from r.t. to 100 °C |
|-------------|---------------------------------------------------------------|-----------------------------------------------------------------|---------------------------------------------------------|
| A           | -1.1                                                          | -0.2                                                            | 0.9                                                     |
| B           | -1.1                                                          | +0.2                                                            | 1.3                                                     |
| C           | -1.1                                                          | +0.3                                                            | 1.4                                                     |
| D           | -1.4                                                          | -0.1                                                            | 1.3                                                     |
| E           | -1.2                                                          | +0.3                                                            | 1.5                                                     |

<sup>a</sup>Data are taken from Table S5.

The difference in selectivity between different precatalyst systems at 100 °C is inconsistent with hypotheses that (a) the temperature effect is solely due to entropy (where higher temperature disfavors a bisligated oxidative addition transition state) or (b) that oxidative addition is reversible at this temperature and selectivity is based on thermodynamics or on the rate of a subsequent step of the catalytic cycle. Instead, these observations are consistent with catalyst decomposition at 100 °C leading to a species that favors chloride activation. Different precatalysts may decompose at different rates. However, further study is needed to generate higher quality data to support or refute this hypothesis. In THF, no significant temperature effect is observed with either precatalyst system, and the reaction is selective for chloride at both temperatures.

## 6. Effect of Additives (Table 6)

**General Procedure:** Without exclusion of air or moisture,  $\text{P}^t\text{Bu}_3\text{-Pd-G4}$  (1.5 mg, 0.0026 mmol, 3 mol %), *o*-tolyl boronic acid (11.0 mg, 0.081 mmol, 1.01 equiv), KF (13.9 mg, 0.24 mmol, 3 equiv), and other additives (0–3 equiv) were combined in a 1-dram vial equipped with a magnetic stir bar. In rapid succession, water (1.4  $\mu\text{L}$ , 0.08 mmol, 1 equiv), 4-chlorophenyl triflate (14  $\mu\text{L}$ , 0.08 mmol, 1 equiv), and solvent (150  $\mu\text{L}$ ) were added to the vial and the mixture was immediately sparged with nitrogen for two minutes. The sparging needle and septum was quickly replaced with a PTFE-lined cap and the reaction was stirred vigorously at room temperature for 24 h. Undecane (7.5  $\mu\text{L}$ ) was added to the reaction mixture as an internal standard, and the mixture was diluted with EtOAc. A small aliquot was removed and filtered through celite, and the celite was washed with additional EtOAc. The filtrate was analyzed by gas chromatography.

**Table S7.** Additive Effects<sup>a</sup>

| entry           | solvent       | additive (equiv)         | trial   | <b>1</b> (%) | <b>2a</b> (%) | <b>2b</b> (%) |
|-----------------|---------------|--------------------------|---------|--------------|---------------|---------------|
| 1               | THF           | --                       | 1       | 5            | 63            | <1            |
| 2               | THF           | --                       | 2       | 23           | 72            | <1            |
| 3               | THF           | --                       | 3       | 26           | 68            | 1             |
| 4               | THF           | --                       | 4       | 25           | 71            | 1             |
| 5               | THF           | --                       | 5       | 27           | 75            | 1             |
| 6               | THF           | --                       | 6       | 24           | 79            | 1             |
| 7               | THF           | --                       | 7       | 20           | 78            | 1             |
| 8               | THF           | --                       | 8       | 18           | 79            | 1             |
| 9               | THF           | --                       | Average | 20           | 74            | <1            |
| 10              | THF           | 18-crown-6 (3)           | 1       | 0            | 2             | 77            |
| 11              | THF           | 18-crown-6 (3)           | 2       | 0            | 1             | 76            |
| 12              | THF           | 18-crown-6 (3)           | Average | 0            | 1             | 76            |
| 13 <sup>b</sup> | THF           | NBu <sub>4</sub> F (3)   | 1       | <1           | <1            | 17            |
| 14 <sup>b</sup> | THF           | NBu <sub>4</sub> F (3)   | 2       | <1           | <1            | 9             |
| 15 <sup>b</sup> | THF           | NBu <sub>4</sub> F (3)   | Average | <1           | <1            | 13            |
| 16              | THF           | NBu <sub>4</sub> Cl (1)  | 1       | 20           | 4             | 70            |
| 17              | THF           | NBu <sub>4</sub> Cl (1)  | 2       | 21           | 4             | 69            |
| 18              | THF           | NBu <sub>4</sub> Cl (1)  | Average | 20           | 4             | 69            |
| 19              | THF           | NBu <sub>4</sub> Br (1)  | 1       | 1            | 4             | 90            |
| 20              | THF           | NBu <sub>4</sub> Br (1)  | 2       | 5            | 1             | 91            |
| 21              | THF           | NBu <sub>4</sub> Br (1)  | Average | 3            | 2             | 91            |
| 22              | THF           | NBu <sub>4</sub> OTf (1) | 1       | 27           | 72            | 3             |
| 23              | THF           | NBu <sub>4</sub> OTf (1) | 2       | 26           | 67            | 3             |
| 24              | THF           | NBu <sub>4</sub> OTf (1) | Average | 26           | 70            | 3             |
| 25              | <i>i</i> PrOH | --                       | 1       | 4            | 79            | 1             |
| 26              | <i>i</i> PrOH | --                       | 2       | 1            | 95            | 1             |
| 27              | <i>i</i> PrOH | --                       | Average | 2            | 87            | 1             |
| 28              | <i>i</i> PrOH | 18-crown-6 (3)           | 1       | 0            | 0             | 5             |
| 29              | <i>i</i> PrOH | 18-crown-6 (3)           | 2       | 0            | 0             | 1             |
| 30              | <i>i</i> PrOH | 18-crown-6 (3)           | Average | 0            | 0             | 3             |

|    |     |                |         |    |    |    |
|----|-----|----------------|---------|----|----|----|
| 31 | PC  | --             | 1       | 12 | 75 | 5  |
| 32 | PC  | --             | 2       | 19 | 68 | 6  |
| 33 | PC  | --             | Average | 15 | 71 | 5  |
| 34 | PC  | 18-crown-6 (3) | 1       | 5  | 2  | 14 |
| 35 | PC  | 18-crown-6 (3) | 2       | 5  | 1  | 8  |
| 36 | PC  | 18-crown-6 (3) | Average | 5  | 1  | 11 |
| 37 | DMF | --             | 1       | 16 | 9  | 58 |
| 38 | DMF | --             | 2       | 19 | 9  | 61 |
| 39 | DMF | --             | 3       | 24 | 11 | 59 |
| 40 | DMF | --             | 4       | 26 | 11 | 59 |
| 41 | DMF | --             | 5       | 16 | 12 | 66 |
| 42 | DMF | --             | 6       | 20 | 11 | 62 |
| 43 | DMF | --             | 7       | 18 | 9  | 66 |
| 44 | DMF | --             | 8       | 46 | 7  | 46 |
| 45 | DMF | --             | Average | 23 | 10 | 60 |
| 46 | DMF | 18-crown-6 (3) | 1       | 0  | 0  | 45 |
| 47 | DMF | 18-crown-6 (3) | 2       | 0  | 0  | 50 |
| 48 | DMF | 18-crown-6 (3) | Average | 0  | 0  | 47 |

<sup>a</sup>GC yields calibrated against undecane as an internal standard. Diarylated product observed in  $\leq 4\%$  yield in all cases except entry 12 (8%). <sup>b</sup>KF was omitted from the reaction mixture.

## 7. Recycling “Decomposed” Catalyst

**Hypothesis:** The results in Tables 3-5 of the manuscript show that heating either the Stille or Suzuki coupling in DMF leads to increased reaction at chloride. One hypothesis is that, upon heating, the catalyst decomposes to a new catalytically active species that preferentially reacts at chloride. If this is the case, then we would expect that the 'decomposed' catalyst would continue to demonstrate chloride-selectivity when it is recycled. To test this hypothesis, we conducted a Suzuki coupling of **1** at 100 °C for 4 h, then added a second substrate (**8**) and a second boronic acid and stirred for an additional 100 °C at either room temperature or 100 °C (Table S9). In order to interpret the results, it was necessary to establish the baseline selectivity of the Suzuki cross-coupling of **8** at both room temperature and 100 °C (Table S8).

**General Procedure for Table S8:** In a nitrogen filled glovebox, Pd<sub>2</sub>dba<sub>3</sub> (0.5 mg, 0.0006 mmol, 0.75 mol %), Pd(Pt-Bu<sub>3</sub>)<sub>2</sub> (0.6 mg, 0.0012 mmol, 1.5 mol %) , and KF (13.9 mg, 0.24 mmol, 3 equiv) were combined in a 1-dram vial equipped with a magnetic stir bar. The vial was sealed with a PTFE-lined cap and removed from the glovebox. Outside of the glovebox, the cap was removed and, in rapid succession, water (1.4  $\mu$ L, 0.08 mmol, 1 equiv), 4-chlorophenyl triflate (14  $\mu$ L, 0.08 mmol, 1 equiv), phenylboronic acid (9.9 mg, 0.081 mmol, 1.01 equiv), and DMF (150  $\mu$ L) were added to the vial and the mixture was immediately sparged with nitrogen for two minutes, then resealed with a PTFE-lined cap. The reaction was stirred vigorously at the indicated temperature for 24 h. Undecane (7.5  $\mu$ L) was added to the reaction mixture as an internal standard, and the mixture was diluted with EtOAc. A small aliquot was removed and filtered through celite, and the celite was washed with additional EtOAc. The filtrate was analyzed by gas chromatography.

**General Procedure for Table S9:** In a nitrogen filled glovebox, Pd<sub>2</sub>dba<sub>3</sub> (0.5 mg, 0.0006 mmol, 0.75 mol %), Pd(Pt-Bu<sub>3</sub>)<sub>2</sub> (0.6 mg, 0.0012 mmol, 1.5 mol %) , *o*-tolyl boronic acid (11.0 mg, 0.081 mmol, 1.01 equiv), and KF (13.9 mg, 0.24 mmol, 3 equiv) were combined in a 1-dram vial equipped with a magnetic stir bar. The vial was sealed with a PTFE-lined cap and removed from the glovebox. Outside of the glovebox, the cap was removed and, in rapid succession, water (1.4  $\mu$ L, 0.08 mmol, 1 equiv), 4-chlorophenyl triflate (14  $\mu$ L, 0.08 mmol, 1 equiv), and DMF (150  $\mu$ L) were added to the vial and the mixture was immediately sparged with nitrogen for two minutes, then resealed with a PTFE-lined cap and the reaction stirred vigorously at 100 °C for 4 h. The reaction was allowed to cool to room temperature, then briefly uncapped (~10 seconds) and phenylboronic acid (9.9 mg, 0.081 mmol, 1.01 equiv) and 4-chloronaphthyl triflate (16  $\mu$ L, 0.08 mmol) were quickly added. The reaction mixture was immediately sparged with nitrogen for two minutes through a septum cap. The sparging needle and septum cap were quickly replaced with a PTFE-lined cap and the reaction was stirred vigorously at the indicated temperature for an additional 24 h. Undecane (7.5  $\mu$ L) and dodecane (8.0  $\mu$ L) were added to the reaction mixture as internal standards, and the mixture was diluted with EtOAc. A small aliquot was removed and filtered through celite, and the celite was washed with additional EtOAc. The filtrate was analyzed by gas chromatography.

**Table S8.** Effect of Temperature on Selectivity of Suzuki Coupling of Substrate **8**<sup>a</sup>

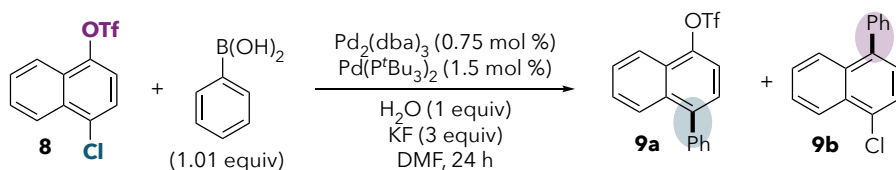

| entry | temperature | trial   | <b>8</b> (%) | <b>9a</b> (%) | <b>9b</b> (%) |
|-------|-------------|---------|--------------|---------------|---------------|
| 1     | r.t.        | 1       | 7            | 3             | 52            |
| 2     | r.t.        | 2       | 16           | 4             | 43            |
| 3     | r.t.        | Average | 11           | 4             | 47            |
| 4     | 100 °C      | 1       | 0            | 1             | 31            |
| 5     | 100 °C      | 2       | 0            | 2             | 30            |
| 6     | 100 °C      | Average | 0            | 1             | 30            |

<sup>a</sup>GC yields calibrated against undecane as an internal standard.

**Table S9.** Recycling Thermally Decomposed Catalyst<sup>a</sup>

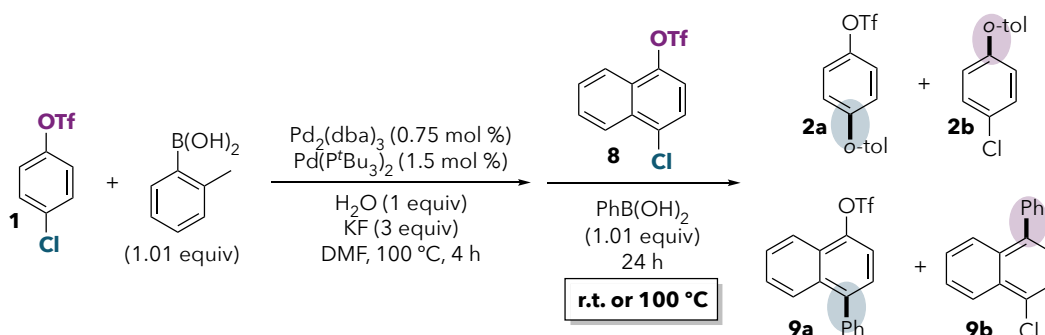

| entry | temperature | trial   | <b>1</b> (%) | <b>2a</b> (%) | <b>2b</b> (%) | <b>8</b> (%) | <b>9a</b> (%) | <b>9b</b> (%) |
|-------|-------------|---------|--------------|---------------|---------------|--------------|---------------|---------------|
| 1     | r.t.        | 1       | 19           | 44            | 22            | 87           | 1             | 7             |
| 2     | r.t.        | 2       | 25           | 40            | 21            | 89           | 1             | 4             |
| 3     | r.t.        | Average | 22           | 42            | 21            | 88           | 1             | 5             |
| 4     | 100 °C      | 1       | 17           | 29            | 17            | 24           | 22            | 13            |
| 5     | 100 °C      | 2       | 17           | 40            | 20            | 25           | 29            | 20            |
| 6     | 100 °C      | Average | 17           | 35            | 18            | 25           | 26            | 17            |

<sup>a</sup>GC yields calibrated against undecane as an internal standard.

**Discussion:** As shown in Table S8, substrate **8** does *not* exhibit the same switch in selectivity at 100 °C as seen for substrate **1** in Table 4 of the manuscript. The major product of Suzuki coupling of **8** is **9b**, from reaction at triflate, at both room temperature and at 100 °C. This observation may be rationalized by the higher reactivity of substrate **8**. If Suzuki coupling is fast, then it can outcompete slower decomposition of catalyst. Notably, the mass balance is poor at both temperatures, suggesting that this substrate is prone to decomposition (e.g., by hydrolysis of the triflate).

When the catalyst is recycled, very poor conversion of **8** is observed at room temperature (Table S9, entry 3). Under these conditions, the major product remains the one resulting from triflate activation (**9b**), albeit in only 5% yield. On the other hand, the use of recycled catalyst at 100 °C leads to preferential reaction at chloride, giving **9a** as the major product in 26% yield (entry 6). Critically, this chloride selectivity is different from the triflate-selectivity observed in the high-temperature Suzuki reaction of **8** using fresh catalyst (Table S8, entry 6). A comparison of Table S8, entry 6 and Table S9, entry 6 demonstrates that high temperature alone is *not* sufficient to cause chloride-selective cross-coupling of **8**. Instead, prior heat treatment of the catalyst (hypothesized to cause decomposition) is necessary before chloride-selectivity can be observed.

These results are consistent with the following scenario: Using fresh catalyst, the Suzuki reaction of **8** is fast enough at 100 °C to outcompete catalyst decomposition. Thus, Suzuki coupling of **8** using fresh catalyst favors triflate activation at both room temperature and 100 °C (Table S8). The active catalytic species is expected to be [Pd(P<sup>t</sup>Bu<sub>3</sub>)(DMF)] prior to decomposition. Heating to 100 °C for 4 h in the presence of Suzuki coupling reagents (including **1**) leads to decomposition of most of the catalyst to an unidentified species that exhibits chloride selectivity. When this decomposed catalyst is recycled at room-temperature for the reaction of **8**, poor yield is observed because the decomposed catalyst is not active at low temperature (i.e., the barrier to one or more steps of the catalytic cycle with this catalytic species is too high to be overcome at room temperature). Instead, the small amount of cross-coupling that does occur at room temperature is catalyzed by residual [Pd(P<sup>t</sup>Bu<sub>3</sub>)(DMF)]. However, the decomposed catalyst is active at 100 °C, and leads primarily to chloride activation (Table S9, entry 2).

## D. Reactions with **3a** and **3b**

### 1. Catalytic Suzuki Couplings

**General Procedure:** Without exclusion of air or moisture,  $\text{P}^t\text{Bu}_3\text{-Pd-G4}$  (1.5 mg, 0.0026 mmol, 3 mol %), *o*-tolyl boronic acid (11.0 mg, 0.081 mmol, 1.01 equiv), and KF (13.9 mg, 0.24 mmol, 3 equiv) were combined in a 1-dram vial equipped with a magnetic stir bar. In rapid succession, water (1.4  $\mu\text{L}$ , 0.08 mmol, 1 equiv), 1-chloro-2-trifluoromethylbenzene (6.5  $\mu\text{L}$ , 0.08 mmol, 1 equiv), 2-trifluoromethylphenyl triflate (14.8  $\mu\text{L}$ , 0.08 mmol, 1 equiv), and a 5:1 mixture of solvent:benzene (150  $\mu\text{L}$ ) were added to the vial and the mixture was immediately sparged with nitrogen for two minutes. The sparging needle and septum was quickly replaced with a PTFE-lined cap and the reaction was stirred vigorously at room temperature for 24 h. Undecane (7.5  $\mu\text{L}$ ) was added to the reaction mixture as an internal standard, and the mixture was diluted with EtOAc. A small aliquot was removed and filtered through celite, and the celite was washed with additional EtOAc. The filtrate was analyzed by gas chromatography.

**Table S10.** Intermolecular Competition Between **3a** and **3b** in the Catalytic Suzuki Coupling<sup>a</sup>

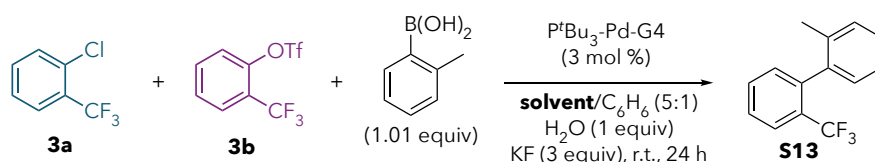

| entry | solvent   | trial   | <b>3a</b> (%) | <b>3b</b> (%) | <b>S13</b> (%) |
|-------|-----------|---------|---------------|---------------|----------------|
| 1     | toluene   | 1       | 11            | 88            | 91             |
| 2     | toluene   | 2       | 13            | 92            | 90             |
| 3     | toluene   | Average | 12            | 90            | 91             |
| 4     | THF       | 1       | 20            | 90            | 86             |
| 5     | THF       | 2       | 20            | 90            | 84             |
| 6     | THF       | Average | 20            | 90            | 85             |
| 7     | acetone   | 1       | 22            | 82            | 84             |
| 8     | acetone   | 2       | 13            | 78            | 92             |
| 9     | acetone   | Average | 17            | 80            | 88             |
| 10    | MeOH      | 1       | 3             | 52            | 94             |
| 11    | MeOH      | 2       | 2             | 43            | 88             |
| 12    | MeOH      | Average | 3             | 48            | 91             |
| 13    | MeCN      | 1       | 92            | 18            | 67             |
| 14    | MeCN      | 2       | 93            | 17            | 66             |
| 15    | MeCN      | Average | 92            | 18            | 66             |
| 16    | DMF       | 1       | 77            | 11            | 88             |
| 17    | DMF       | 2       | 79            | 15            | 81             |
| 18    | DMF       | Average | 78            | 13            | 84             |
| 19    | sulfolane | 1       | 55            | 61            | 50             |
| 20    | sulfolane | 2       | 64            | 58            | 37             |
| 21    | sulfolane | Average | 59            | 60            | 43             |
| 22    | PC        | 1       | 30            | 80            | 75             |
| 23    | PC        | 2       | 26            | 77            | 84             |
| 24    | PC        | Average | 28            | 78            | 79             |

<sup>a</sup>GC yield calibrated against undecane as an internal standard.

**Discussion:** The catalytic cross-coupling selectivity shown in Table S10 qualitatively matches the selectivity observed in the stoichiometric oxidative addition studies (Table 3). However, the mass balance is poor in polar solvents. For example, 91% yield of **S13** is observed in MeOH, but 149% of the starting material is consumed (97% of **3a** and 52% of **3b**). The poor mass balance in polar solvents is likely due to hydrolysis of the electron-deficient aryl triflate **3b**.

## 2. Stoichiometric Oxidative Addition Studies (Table 3)

### a. <sup>19</sup>F NMR Calibrations

**Representative Procedure:** Inside a nitrogen-filled glovebox, P<sup>t</sup>Bu<sub>3</sub> (5.5 mg, 0.027 mmol, 1 equiv) was measured into a 1-dram scintillation vial. In a separate vial, a solution was prepared of **3a** (3.6 μL, 0.027 mmol, 1 equiv), **3b** (5.0 μL, 0.027 mmol, 1 equiv), and C<sub>6</sub>H<sub>5</sub>F (7.6 μL, 0.081 mmol, 3 equiv) in C<sub>6</sub>D<sub>6</sub> (100 μL). 500 μL of the indicated solvent was added to the vial containing P<sup>t</sup>Bu<sub>3</sub>, followed by the entire volume of the substrate solution. The vial was capped and shaken briefly, and then the solution was transferred via Pasteur pipette into an NMR tube. The tube was capped tightly, removed from the glovebox, and the sample was immediately analyzed by <sup>19</sup>F NMR. The observed ratio of substrate to C<sub>6</sub>H<sub>5</sub>F signals at this "time=0" was used to define the expected ratios for 100% calibrated yield of recovered substrates in the subsequent intermolecular competition reactions run for 6 h. For **3b**, yields were calculated separately based on each of its two fluorine signals and then averaged together.

### b. <sup>19</sup>F NMR Chemical Shifts

Peaks corresponding to **3a**, **3b**, and 'free' triflate were assigned by comparison to the spectra of authentic samples of **3a**, **3b**, and NBu<sub>4</sub>OTf in 600 μL of a mixture of solvent:C<sub>6</sub>D<sub>6</sub> (5:1 v/v). Chemical shifts were referenced to fluorobenzene (set to -113.15 ppm regardless of solvent). The <sup>19</sup>F NMR signals corresponding to **S10** were assigned by comparison to the spectra of an authentic sample prepared by a literature procedure and/or by analogy to the published spectral data for this compound and the spectra in other solvents.<sup>4</sup> Relevant chemical shifts in the different solvent mixtures are assigned as follows:

**Table S11.** <sup>19</sup>F Chemical Shifts of Relevant Species by Solvent: *ortho*-CF<sub>3</sub> Substrates

|                   | 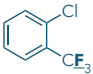 | 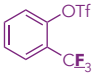 | 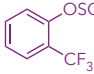 | OTf <sup>-</sup> anion<br>(NBu <sub>4</sub> OTf) | 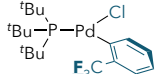 |
|-------------------|-------------------------------------------------------------------------------------|-------------------------------------------------------------------------------------|-------------------------------------------------------------------------------------|--------------------------------------------------|---------------------------------------------------------------------------------------|
|                   | <b>3a</b>                                                                           | <b>3b</b>                                                                           | <b>3b</b>                                                                           |                                                  | <b>S10</b>                                                                            |
| toluene           | -62.9                                                                               | -61.2                                                                               | -74.7                                                                               | -78.4                                            | -55.3 <sup>b</sup>                                                                    |
| THF               | -62.2                                                                               | -60.3                                                                               | -74.0                                                                               | -78.1                                            | -54.7 <sup>c</sup>                                                                    |
| acetone           | -61.6                                                                               | -59.7                                                                               | -73.5                                                                               | -77.4                                            | -54.1 <sup>c</sup>                                                                    |
| MeOH <sup>a</sup> | -61.9                                                                               | -60.0                                                                               | -73.6                                                                               | -78.0                                            | -54.3 <sup>b</sup>                                                                    |
| MeCN              | -61.5                                                                               | -59.5                                                                               | -73.1                                                                               | -77.5                                            | -54.1 <sup>b</sup>                                                                    |
| DMF               | -61.1                                                                               | -59.4                                                                               | -73.3                                                                               | -77.4                                            | -53.9 <sup>b</sup>                                                                    |
| sulfolane         | -59.8                                                                               | -61.7                                                                               | -73.5                                                                               | -80.0                                            | <i>n.d.</i> <sup>d</sup>                                                              |
| PC                | -59.5                                                                               | -61.1                                                                               | -73.1                                                                               | -77.7                                            | -54.1 <sup>c</sup>                                                                    |

<sup>a</sup>In a control reaction in this solvent in the absence of palladium, a small amount of decomposition of **3b** to form 2-CF<sub>3</sub>C<sub>6</sub>H<sub>4</sub>OH and free OTf was observed. <sup>b</sup>Chemical shift was identified by analysis of the authentic material, prepared by a literature

procedure,<sup>4</sup> in the indicated solvent. <sup>c</sup>Chemical shift was identified in the oxidative addition reactions by analogy to the chemical shift observed of this compound in other solvents. <sup>d</sup>n.d. = not determined.

### c. Oxidative Addition Reactions

**Representative Procedure:** Inside a nitrogen-filled glovebox, P<sup>t</sup>Bu<sub>3</sub> (5.5 mg, 0.027 mmol, 1 equiv) and Pd(COD)(CH<sub>2</sub>TMS)<sub>2</sub> (10.5 mg, 0.027 mmol, 1 equiv) were combined in a 1-dram vial equipped with a stir bar. In a separate vial, a solution was prepared of **3a** (3.6 μL, 0.027 mmol, 1 equiv), **3b** (5.0 μL, 0.027 mmol, 1 equiv), and C<sub>6</sub>H<sub>5</sub>F (7.6 μL, 0.081 mmol, 3 equiv) in C<sub>6</sub>D<sub>6</sub> (100 μL). 500 μL of the indicated solvent was added to the vial containing P<sup>t</sup>Bu<sub>3</sub> and Pd(COD)(CH<sub>2</sub>TMS)<sub>2</sub>, followed by the entire volume of the substrate solution. The vial was sealed with a PTFE-lined cap and the reaction was allowed to stir for 6 h at room temperature. The reaction mixture was transferred via Pasteur pipette into an NMR tube. The tube was capped tightly, removed from the glovebox, and immediately analyzed by <sup>19</sup>F NMR.

**Table S12.** Stoichiometric oxidative addition reactions of **3a** and **3b**.

| 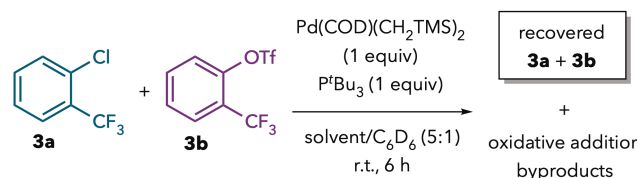 |         |         |                                         |           |                           |
|------------------------------------------------------------------------------------|---------|---------|-----------------------------------------|-----------|---------------------------|
| entry                                                                              | solvent | trial   | recovered (%) <sup>a</sup><br><b>3a</b> | <b>3b</b> | reacted<br><b>3a : 3b</b> |
| 1                                                                                  | toluene | 1       | 90                                      | ≥99       | ≥ 10 : 1                  |
| 2                                                                                  | toluene | 2       | 89                                      | ≥99       | ≥ 11 : 1                  |
| 3                                                                                  | toluene | Average | 89                                      | ≥99       | ≥ 11 : 1                  |
| 4 <sup>b</sup>                                                                     | toluene | 1       | 64                                      | ≥99       | ≥ 36 : 1                  |
| 5 <sup>b</sup>                                                                     | toluene | 2       | 40                                      | 91        | 7 : 1                     |
| 6 <sup>b</sup>                                                                     | toluene | Average | 52                                      | 98        | 24 : 1                    |
| 7                                                                                  | THF     | 1       | 61                                      | ≥99       | ≥39 : 1                   |
| 8                                                                                  | THF     | 2       | 52                                      | ≥99       | ≥48 : 1                   |
| 9                                                                                  | THF     | 3       | 51                                      | 92        | 6 : 1                     |
| 10                                                                                 | THF     | Average | 55                                      | 97        | 15 : 1                    |
| 11                                                                                 | acetone | 1       | 69                                      | 91        | 3 : 1                     |
| 12                                                                                 | acetone | 2       | 73                                      | ≥99       | ≥27 : 1                   |
| 13                                                                                 | acetone | Average | 71                                      | 98        | 15 : 1                    |
| 14                                                                                 | MeOH    | 1       | 66                                      | ≥99       | ≥36 : 1                   |
| 15                                                                                 | MeOH    | 2       | 74                                      | ≥99       | ≥26 : 1                   |
| 16                                                                                 | MeOH    | Average | 70                                      | ≥99       | ≥30 : 1                   |
| 17                                                                                 | MeCN    | 1       | 94                                      | 0         | 1 : 16                    |
| 18                                                                                 | MeCN    | 2       | 96                                      | 3         | 1 : 24                    |
| 19                                                                                 | MeCN    | 3       | ≥99                                     | 0         | ≤1 : 100                  |
| 20                                                                                 | MeCN    | 4       | ≥99                                     | 0         | ≤1 : 100                  |
| 21                                                                                 | MeCN    | Average | 97                                      | 1         | 1 : 33                    |
| 22                                                                                 | DMF     | 1       | 88                                      | 57        | 1 : 4                     |
| 23                                                                                 | DMF     | 2       | 87                                      | 57        | 1 : 3                     |
| 24                                                                                 | DMF     | 3       | 76                                      | 33        | 1 : 3                     |
| 25                                                                                 | DMF     | 4       | 63                                      | 29        | 1 : 2                     |
| 26                                                                                 | DMF     | Average | 78                                      | 44        | 1 : 3                     |

|                 |                                |         |      |     |         |
|-----------------|--------------------------------|---------|------|-----|---------|
| 27              | sulfolane                      | 1       | 82   | 93  | 3 : 1   |
| 28              | sulfolane                      | 2       | 90   | 98  | 5 : 1   |
| 29              | sulfolane                      | Average | 86   | 95  | 3 : 1   |
| 30              | PC <sup>c</sup>                | 1       | 74   | 93  | 4 : 1   |
| 31              | PC <sup>c</sup>                | 2       | 79   | 95  | 4 : 1   |
| 32              | PC <sup>c</sup>                | 3       | 98   | 97  | 1 : 2   |
| 33              | PC <sup>c</sup>                | 4       | 80   | 92  | 3 : 1   |
| 34              | PC <sup>c</sup>                | Average | 83   | 94  | 3 : 1   |
| 35 <sup>d</sup> | MeCN                           | 1       | >99  | ≥99 | --      |
| 36 <sup>d</sup> | DMF                            | 1       | >99  | ≥99 | --      |
| 37 <sup>e</sup> | MeCN                           | 1       | n.a. | 5   | --      |
| 38 <sup>e</sup> | MeCN                           | 2       | n.a. | 3   | --      |
| 39 <sup>e</sup> | MeCN                           | 3       | n.a. | 0   | --      |
| 40 <sup>e</sup> | MeCN                           | Average | n.a. | 3   | --      |
| 41 <sup>e</sup> | DMF                            | 1       | n.a. | 23  | --      |
| 42 <sup>e</sup> | DMF                            | 2       | n.a. | 25  | --      |
| 43 <sup>e</sup> | DMF                            | 3       | n.a. | 36  | --      |
| 44 <sup>e</sup> | DMF                            | Average | n.a. | 28  | --      |
| 45              | Toluene- <i>d</i> <sub>8</sub> | 1       | 74   | 97  | 9 : 1   |
| 46              | Toluene- <i>d</i> <sub>8</sub> | 2       | 85   | ≥99 | ≥15 : 1 |
| 47              | Toluene- <i>d</i> <sub>8</sub> | Average | 79   | 98  | 11 : 1  |
| 48              | MeCN- <i>d</i> <sub>3</sub>    | 1       | 87   | 0   | 1 : 8   |
| 49              | MeCN- <i>d</i> <sub>3</sub>    | 2       | 87   | 1   | 1 : 8   |
| 50              | MeCN- <i>d</i> <sub>3</sub>    | Average | 87   | 1   | 1 : 8   |
| 51              | DMF- <i>d</i> <sub>7</sub>     | 1       | 91   | 40  | 1 : 7   |
| 52              | DMF- <i>d</i> <sub>7</sub>     | 2       | 93   | 52  | 1 : 7   |
| 53              | DMF- <i>d</i> <sub>7</sub>     | Average | 92   | 46  | 1 : 7   |
| 54 <sup>f</sup> | DMF                            | 1       | 36   | 34  | 1 : 1   |
| 55 <sup>f</sup> | DMF                            | 2       | 47   | 45  | 1 : 1   |
| 56 <sup>f</sup> | DMF                            | Average | 42   | 39  | 1 : 1   |
| 57 <sup>g</sup> | DMF                            | 1       | 94   | 86  | 1 : 2   |
| 58 <sup>g</sup> | DMF                            | 2       | 98   | 83  | 1 : 8   |
| 59 <sup>g</sup> | DMF                            | Average | 96   | 83  | 1 : 4   |

<sup>a</sup> <sup>19</sup>F NMR yields calibrated against C<sub>6</sub>H<sub>5</sub>F as an internal standard. <sup>b</sup>Heated to 80 °C for 2 h. <sup>c</sup>PC = propylene carbonate. <sup>d</sup>Pd(COD)(CH<sub>2</sub>TMS)<sub>2</sub> was omitted from the reaction mixture. <sup>e</sup>**3a** was omitted from the reaction mixture (n.a. = not applicable).

<sup>f</sup> Heated at 100 °C. <sup>g</sup>Cooled to 0 °C.

**Table S13.** Stoichiometric oxidative addition reactions of **3a** and **3b** in DMF tracked over time.<sup>a</sup>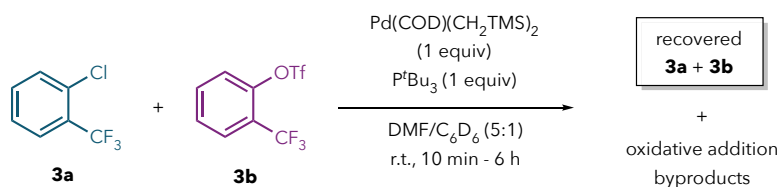

| entry | time   | recovered (%) <sup>b</sup> |           | reacted<br><b>3a</b> : <b>3b</b> |
|-------|--------|----------------------------|-----------|----------------------------------|
|       |        | <b>3a</b>                  | <b>3b</b> |                                  |
| 1     | 10 min | 99                         | 94        | 1 : 3                            |
| 2     | 20 min | ≥99                        | 95        | <1 : 5                           |
| 3     | 30 min | 99                         | 93        | 1 : 7                            |
| 4     | 1 h    | 98                         | 88        | 1 : 6                            |
| 5     | 3 h    | 98                         | 82        | 1 : 9                            |
| 6     | 6 h    | 97                         | 74        | 1 : 9                            |

<sup>a</sup>The reaction setup differed from the Representative Procedure in that the reaction was run in an NMR tube (without stirring) instead of in a vial with a stir bar. <sup>b</sup><sup>19</sup>F NMR yields calibrated against C<sub>6</sub>H<sub>5</sub>F as an internal standard.

#### Analysis of Variable Temperature and Time Studies for the Reaction in DMF

Three main signals are observed in the <sup>31</sup>P NMR spectrum of the DMF reaction after 6 h at room temperature: 85 ppm [assigned to Pd(P<sup>t</sup>Bu<sub>3</sub>)<sub>2</sub>], ~75 ppm, and 53 ppm (assigned to cationic HP<sup>t</sup>Bu<sub>3</sub>). At 0 °C, the phosphonium signal is absent, but there is an additional signal at ~64 ppm. Finally, at 100 °C there are around a dozen signals. One small signal corresponds to Pd(P<sup>t</sup>Bu<sub>3</sub>)<sub>2</sub>, but none of the other signals match those seen at r.t. or 0 °C. Figure S5 illustrates the <sup>31</sup>P NMR spectra of these reactions, which correspond to entries 26, 56, and 59 in Table S12. The signals at ~74 and ~64 are tentatively assigned as products resulting from oxidative addition of aryl triflate **3b**. The following observations are worth noting:

- The signal at 64 ppm is observable within 10 minutes at room temperature (Table S13 and Figure S6), but is slowly replaced by the signal at 74 ppm. By 3 h reaction time, the 64 ppm signal is gone but the 74 ppm signal remains at 6 h.
- The signal at 64 ppm is detected even at 6 h when the reaction is run at cold temperature (0 °C).
- The signal at 74 ppm is detected even in the absence of **3a**, so it is not derived from **3a**.

Two signals in the <sup>19</sup>F NMR spectra for the time studies in DMF display a pattern of growth and disappearance that matches those of the signals in the <sup>31</sup>P NMR spectra. These are labeled in Figure S7 with the same labels used in Figure S6.

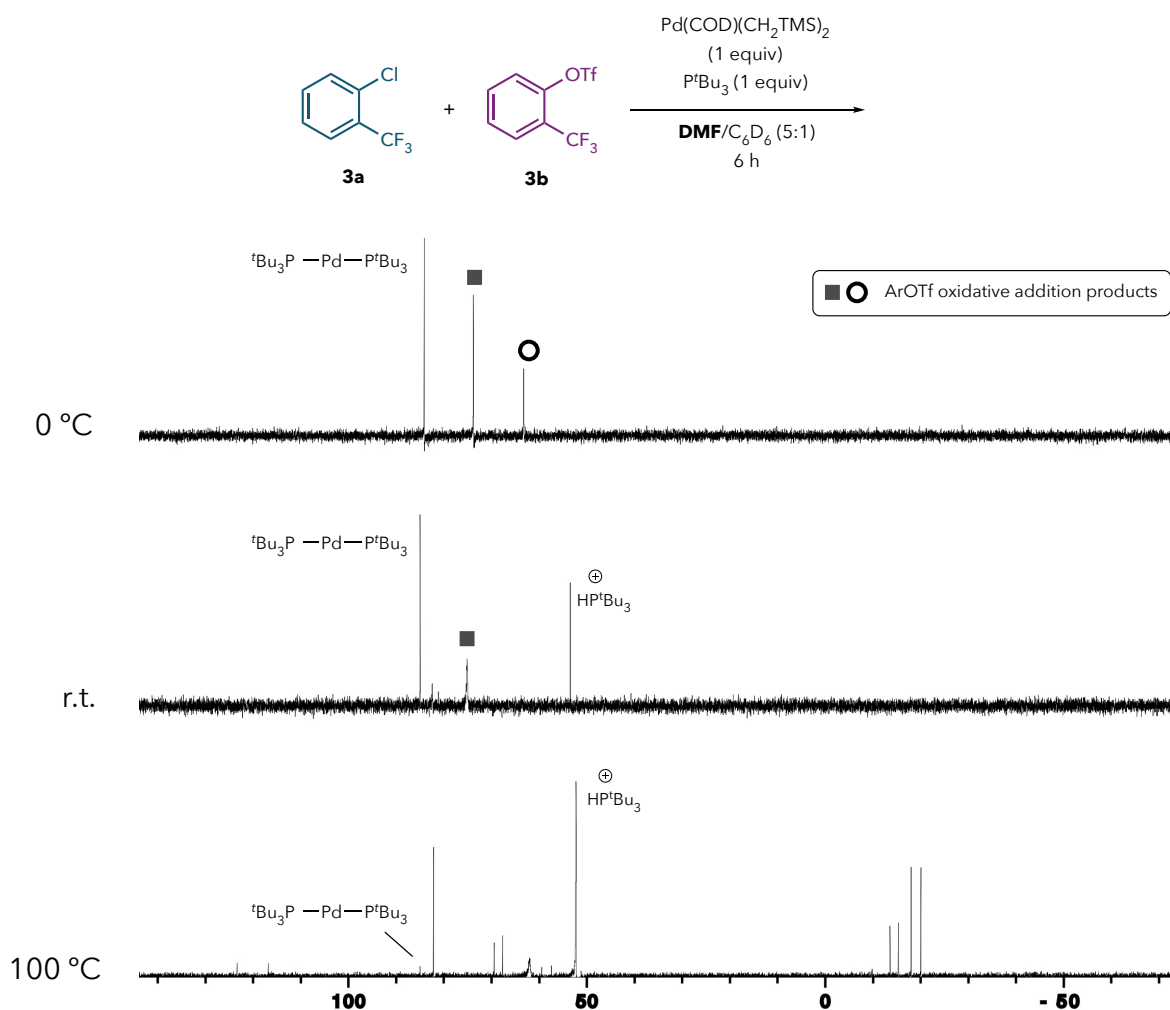

**Figure S5.** Stacked  $^{31}\text{P}$  NMR spectra for the reaction of **3a** and **3b** in DMF at three temperatures.

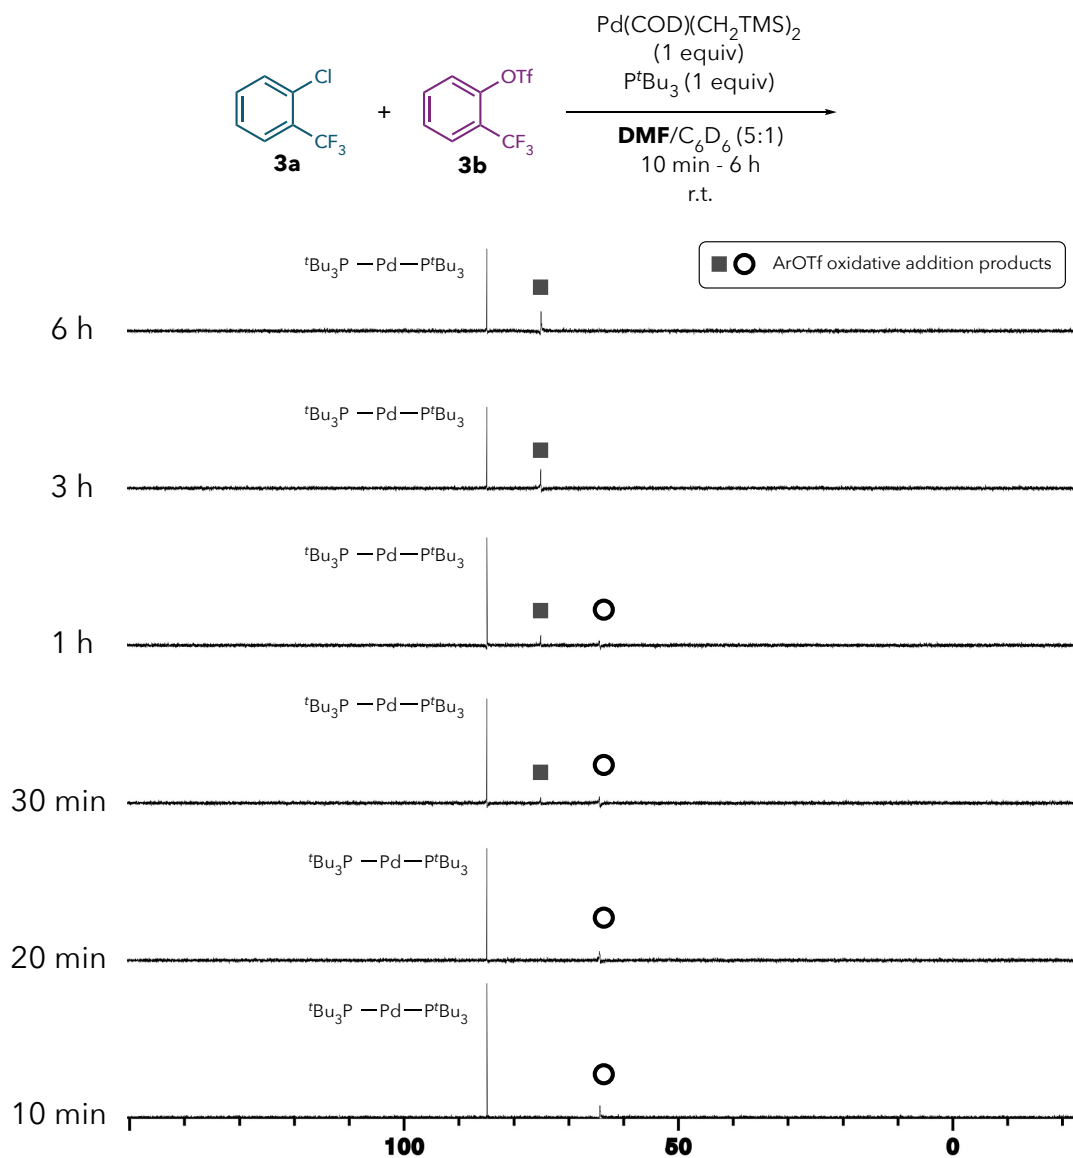

**Figure S6.** Stacked  $^{31}\text{P}$  NMR spectra for the reaction of **3a** and **3b** tracked over time.

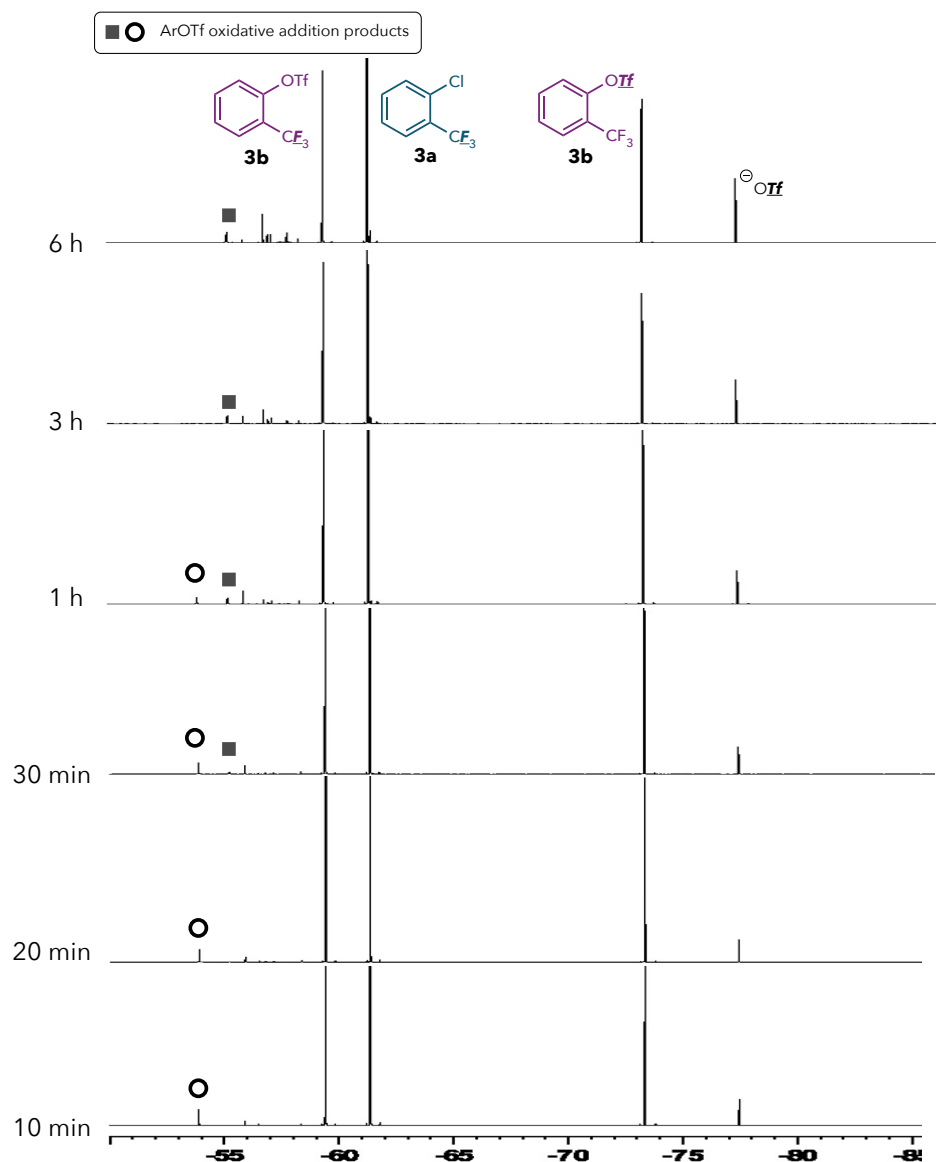

**Figure S7.** Stacked  $^{19}\text{F}$  NMR spectra for the reaction of **3a** and **3b** tracked over time.

See pages S91-S135 for additional representative NMR spectra corresponding to the stoichiometric experiments with **3a** and **3b** (spectra are provided for a single replicate of each experiment, although most experiments were repeated multiple times).

#### Analysis of Decomposition Products of Oxidative Addition Adducts

The stoichiometric reaction of **3a** and **3b** was repeated in deuterated toluene, acetonitrile, and DMF (i.e., repeats of entries 3, 21, and 26 of Table S12 using deuterio instead of protio solvents). The results were analyzed by  $^1\text{H}$  NMR as well as by GCMS. The primary compounds detected by GCMS have  $m/z = 252$ , which is consistent with Heck coupling products resulting from reaction of  $\text{Pd}(\text{Ar})$  oxidative addition adducts with COD. Indeed,  $^1\text{H}$  NMR reveals the presence of alkene signals that do not correspond to COD itself (see S92, S102, and S107).

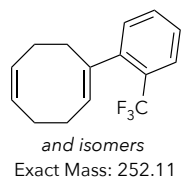

GCMS was also used to analyze the reactions of the stoichiometric oxidative additions performed in THF and propylene carbonate (PC). Heck products were detected in THF but not in PC.

## E. Reactions with **S15a** and **S15b**

### 1. Catalytic Suzuki Couplings

**General Procedure:** Without exclusion of air or moisture,  $\text{P}^t\text{Bu}_3\text{-Pd-G4}$  (1.5 mg, 0.0026 mmol, 3 mol %), *o*-tolyl boronic acid (11.0 mg, 0.081 mmol, 1.01 equiv), and KF (13.9 mg, 0.24 mmol, 3 equiv) were combined in a 1-dram vial equipped with a magnetic stir bar. In rapid succession, water (1.4  $\mu\text{L}$ , 0.08 mmol, 1 equiv), 1-chloro-4-trifluoromethylbenzene (10.8  $\mu\text{L}$ , 0.08 mmol, 1 equiv), 4-trifluoromethylphenyl triflate (14.8  $\mu\text{L}$ , 0.08 mmol, 1 equiv), and a 5:1 mixture of solvent:benzene (150  $\mu\text{L}$ ) were added to the vial and the mixture was immediately sparged with nitrogen for two minutes. The sparging needle and septum was quickly replaced with a PTFE-lined cap and the reaction was stirred vigorously at room temperature for 24 h. Undecane (7.5  $\mu\text{L}$ ) was added to the reaction mixture as an internal standard, and the mixture was diluted with EtOAc. A small aliquot was removed and filtered through celite, and the celite was washed with additional EtOAc. The filtrate was analyzed by gas chromatography.

**Table S14.** Intermolecular Competition Between **S15a** and **S15b** in the Catalytic Suzuki Coupling<sup>a</sup>

| entry | trial   | solvent | recovered<br><b>S15a</b> (%) | recovered<br><b>S15b</b> (%) | total conversion<br><b>S15a + S15b</b> (%) | reacted<br><b>S15a : S15b</b> |
|-------|---------|---------|------------------------------|------------------------------|--------------------------------------------|-------------------------------|
| 1     | 1       | THF     | 18                           | 89                           | 92                                         | 7.7 : 1                       |
| 2     | 2       | THF     | 2                            | 88                           | 110                                        | 8.3 : 1                       |
| 3     | average | THF     | 10                           | 89                           | 101                                        | 8.0 : 1                       |
| 4     | 1       | MeCN    | 68                           | 1                            | 131                                        | 1 : 3.1                       |
| 5     | 2       | MeCN    | 53                           | 1                            | 147                                        | 1 : 2.1                       |
| 6     | average | MeCN    | 60                           | 1                            | 139                                        | 1 : 2.5                       |
| 7     | 1       | DMF     | 60                           | 48                           | 92                                         | 1 : 1.3                       |
| 8     | 2       | DMF     | 58                           | 52                           | 90                                         | 1 : 1.2                       |
| 9     | average | DMF     | 59                           | 50                           | 91                                         | 1 : 1.2                       |
| 10    | 1       | PC      | 4                            | 61                           | 135                                        | 2.4 : 1                       |
| 11    | 2       | PC      | 7                            | 64                           | 129                                        | 2.6 : 1                       |
| 12    | average | PC      | 6                            | 62                           | 132                                        | 2.5 : 1                       |

<sup>a</sup>GC yield calibrated against undecane as an internal standard.

**Discussion:** The catalytic cross-coupling selectivities shown in Table S14 qualitatively match the selectivity observed in the stoichiometric oxidative additions and catalytic couplings of **3a/3b** and **1**. However, it is clear that one or both of the substrates is decomposing in a non-productive pathway based on the >100% conversion observed in some cases. Hydrolysis of the electron-deficient aryl triflate **S15b** is likely taking place.

## 2. Stoichiometric Oxidative Addition Studies

### a. <sup>19</sup>F NMR Calibrations

**Representative Procedure:** Inside a nitrogen-filled glovebox, P<sup>t</sup>Bu<sub>3</sub> (5.5 mg, 0.027 mmol, 1 equiv) was measured into a 1-dram scintillation vial. In a separate vial, a solution was prepared of **S15a** (3.6 μL, 0.027 mmol, 1 equiv), **S15b** (5.0 μL, 0.027 mmol, 1 equiv), and C<sub>6</sub>H<sub>5</sub>F (7.6 μL, 0.081 mmol, 3 equiv) in C<sub>6</sub>D<sub>6</sub> (100 μL). 500 μL of the indicated solvent was added to the vial containing P<sup>t</sup>Bu<sub>3</sub>, followed by the entire volume of the substrate solution. The vial was capped and shaken briefly, and then the solution was transferred via Pasteur pipette into an NMR tube. The tube was capped tightly, removed from the glovebox, and the sample was immediately analyzed by <sup>19</sup>F NMR. The observed ratio of substrate to C<sub>6</sub>H<sub>5</sub>F signals at this "time=0" was used to define the expected ratios for 100% calibrated yield of recovered substrates in the subsequent intermolecular competition reactions run for 6 h. For **S15b**, yields were calculated separately based on each of its two fluorine signals and then averaged together.

### b. <sup>19</sup>F NMR Chemical Shifts

Peaks corresponding to **S15a**, **S15b**, and unbound triflate were assigned by comparison to the spectra of authentic samples of **S15a**, **S15b**, and NBu<sub>4</sub>OTf in 600 μL of a mixture of solvent:C<sub>6</sub>D<sub>6</sub> (5:1 v/v). Chemical shifts were referenced to fluorobenzene (set to -113.15 ppm regardless of solvent). The <sup>19</sup>F NMR signals corresponding to the putative complex **S16** were assigned by comparison to the spectra obtained by reacting **S15a** in the absence of **S15b** in THF. Relevant chemical shifts in the different solvent mixtures are assigned as follows:

**Table S15.** <sup>19</sup>F Chemical Shifts of Relevant Species by Solvent: *para*-CF<sub>3</sub> Substrates <sup>a</sup>

|      | 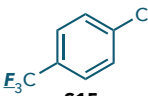<br><b>S15a</b> | 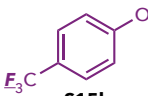<br><b>S15b</b> | 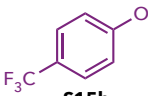<br><b>S15b</b> | OTf <sup>-</sup> anion<br>(NBu <sub>4</sub> OTf) | 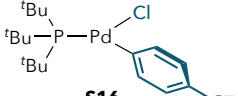<br><b>S16</b> |
|------|----------------------------------------------------------------------------------------------------|----------------------------------------------------------------------------------------------------|----------------------------------------------------------------------------------------------------|--------------------------------------------------|-----------------------------------------------------------------------------------------------------|
| THF  | -62.3                                                                                              | -62.3                                                                                              | -73.2                                                                                              | -78.2                                            | -62.8 <sup>b</sup>                                                                                  |
| MeCN | -61.5                                                                                              | -61.6                                                                                              | -72.2                                                                                              | -77.6                                            | -60.9 <sup>b</sup>                                                                                  |
| DMF  | -61.4                                                                                              | -61.4                                                                                              | -72.6                                                                                              | -77.4                                            | n.d.                                                                                                |
| PC   | -61.4                                                                                              | -61.5                                                                                              | -72.3                                                                                              | -77.7                                            | -60.7 <sup>b</sup>                                                                                  |

<sup>a</sup>The chemical shifts of the Ar-CF<sub>3</sub> groups of **S15a** and **S15b** are very close. In each of the 4 solvents examined, the <sup>19</sup>F signal for **S15a** is slightly further downfield than **S15b**. n.d. = not determined. <sup>b</sup>Tentative assignment; the chemical shift of **S16** was assigned by analogy to **S10** and by corroboration with <sup>31</sup>P NMR.

### c. Oxidative Addition Reactions

**Representative Procedure:** Inside a nitrogen-filled glovebox, P<sup>t</sup>Bu<sub>3</sub> (5.5 mg, 0.027 mmol, 1 equiv) and Pd(COD)(CH<sub>2</sub>TMS)<sub>2</sub> (10.5 mg, 0.027 mmol, 1 equiv) were combined in a 1-dram vial equipped with a stir bar. In a

separate vial, a solution was prepared of **S15a** (3.6  $\mu$ L, 0.027 mmol, 1 equiv), **S15b** (5.0  $\mu$ L, 0.027 mmol, 1 equiv), and C<sub>6</sub>H<sub>5</sub>F (7.6  $\mu$ L, 0.081 mmol, 3 equiv) in C<sub>6</sub>D<sub>6</sub> (100  $\mu$ L). 500  $\mu$ L of the indicated solvent was added to the vial containing P<sup>t</sup>Bu<sub>3</sub> and Pd(COD)(CH<sub>2</sub>TMS)<sub>2</sub>, followed by the entire volume of the substrate solution. The vial was sealed with a PTFE-lined cap and the reaction was allowed to stir for 6 h at room temperature. The reaction mixture was transferred via Pasteur pipette into an NMR tube. The tube was capped tightly, removed from the glovebox, and immediately analyzed by <sup>19</sup>F NMR.

**Table S16.** Solvent effect on selective of stoichiometric oxidative addition

| <div style="display: flex; align-items: center; justify-content: center;"> <div style="text-align: center;"> 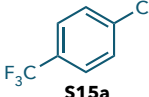 <p><b>S15a</b></p> </div> <div style="text-align: center; margin: 0 20px;"> 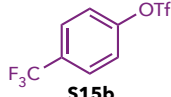 <p><b>S15b</b></p> </div> <div style="text-align: center;"> <p>Pd(COD)(CH<sub>2</sub>TMS)<sub>2</sub><br/>(1 equiv)<br/>P<sup>t</sup>Bu<sub>3</sub> (1 equiv)</p> <p>solvent/C<sub>6</sub>D<sub>6</sub> (5:1)<br/>r.t., 6 h</p> </div> <div style="text-align: center;"> <div style="border: 1px solid black; padding: 2px; display: inline-block;">recovered<br/><b>S15a + S15b</b></div> <p>+<br/>oxidative addition<br/>byproducts</p> </div> </div> |         |                 |                            |     |                                            |                               |
|----------------------------------------------------------------------------------------------------------------------------------------------------------------------------------------------------------------------------------------------------------------------------------------------------------------------------------------------------------------------------------------------------------------------------------------------------------------------------------------------------------------------------------------------------------------------------------------------------------------------------------------------------------------------------------------------------------------------------------------------------------------------------------------------------------------------|---------|-----------------|----------------------------|-----|--------------------------------------------|-------------------------------|
| entry                                                                                                                                                                                                                                                                                                                                                                                                                                                                                                                                                                                                                                                                                                                                                                                                                | trial   | solvent         | recovered (%) <sup>a</sup> |     | total conversion<br><b>S15a + S15b</b> (%) | reacted<br><b>S15a : S15b</b> |
| 1                                                                                                                                                                                                                                                                                                                                                                                                                                                                                                                                                                                                                                                                                                                                                                                                                    | 1       | THF             | 50                         | >99 | 50                                         | > 50 : 1                      |
| 2                                                                                                                                                                                                                                                                                                                                                                                                                                                                                                                                                                                                                                                                                                                                                                                                                    | 2       | THF             | 28                         | 99  | 72                                         | >72 : 1                       |
| 3                                                                                                                                                                                                                                                                                                                                                                                                                                                                                                                                                                                                                                                                                                                                                                                                                    | Average | THF             | 39                         | >99 | 61                                         | >61 : 1                       |
| 4                                                                                                                                                                                                                                                                                                                                                                                                                                                                                                                                                                                                                                                                                                                                                                                                                    | 1       | MeCN            | 71                         | 7   | 122                                        | 1 : 3                         |
| 5                                                                                                                                                                                                                                                                                                                                                                                                                                                                                                                                                                                                                                                                                                                                                                                                                    | 2       | MeCN            | 51                         | 9   | 140                                        | 1 : 2                         |
| 6                                                                                                                                                                                                                                                                                                                                                                                                                                                                                                                                                                                                                                                                                                                                                                                                                    | Average | MeCN            | 61                         | 8   | 131                                        | 1 : 2                         |
| 7                                                                                                                                                                                                                                                                                                                                                                                                                                                                                                                                                                                                                                                                                                                                                                                                                    | 1       | DMF             | 62                         | 14  | 124                                        | 1 : 2                         |
| 8                                                                                                                                                                                                                                                                                                                                                                                                                                                                                                                                                                                                                                                                                                                                                                                                                    | 2       | DMF             | 50                         | 11  | 139                                        | 1 : 2                         |
| 9                                                                                                                                                                                                                                                                                                                                                                                                                                                                                                                                                                                                                                                                                                                                                                                                                    | Average | DMF             | 56                         | 13  | 131                                        | 1 : 2                         |
| 10                                                                                                                                                                                                                                                                                                                                                                                                                                                                                                                                                                                                                                                                                                                                                                                                                   | 1       | PC <sup>b</sup> | 52                         | 98  | 50                                         | 24 : 1                        |
| 11                                                                                                                                                                                                                                                                                                                                                                                                                                                                                                                                                                                                                                                                                                                                                                                                                   | 2       | PC <sup>b</sup> | 51                         | 91  | 60                                         | 6 : 1                         |
| 12                                                                                                                                                                                                                                                                                                                                                                                                                                                                                                                                                                                                                                                                                                                                                                                                                   | Average | PC <sup>b</sup> | 51                         | 95  | 54                                         | 10 : 1                        |
| 13 <sup>c</sup>                                                                                                                                                                                                                                                                                                                                                                                                                                                                                                                                                                                                                                                                                                                                                                                                      | 1       | DMF             | >99                        | >99 | <1                                         | --                            |
| 14 <sup>c</sup>                                                                                                                                                                                                                                                                                                                                                                                                                                                                                                                                                                                                                                                                                                                                                                                                      | 1       | MeCN            | 89                         | >99 | 11                                         | >11 : 1                       |
| 15 <sup>c</sup>                                                                                                                                                                                                                                                                                                                                                                                                                                                                                                                                                                                                                                                                                                                                                                                                      | 2       | MeCN            | 93                         | 95  | 12                                         | 1 : 1                         |
| 16 <sup>c</sup>                                                                                                                                                                                                                                                                                                                                                                                                                                                                                                                                                                                                                                                                                                                                                                                                      | Average | MeCN            | 91                         | >99 | 9                                          | > 9 : 1                       |
| 17 <sup>c,d</sup>                                                                                                                                                                                                                                                                                                                                                                                                                                                                                                                                                                                                                                                                                                                                                                                                    | 1       | MeCN            | 97                         | 96  | 7                                          | 1 : 1                         |
| 18 <sup>c,d</sup>                                                                                                                                                                                                                                                                                                                                                                                                                                                                                                                                                                                                                                                                                                                                                                                                    | 2       | MeCN            | 85                         | 97  | 18                                         | 5 : 1                         |
| 19 <sup>c,d</sup>                                                                                                                                                                                                                                                                                                                                                                                                                                                                                                                                                                                                                                                                                                                                                                                                    | Average | MeCN            | 91                         | 97  | 12                                         | 3 : 1                         |
| 20 <sup>d</sup>                                                                                                                                                                                                                                                                                                                                                                                                                                                                                                                                                                                                                                                                                                                                                                                                      | 1       | MeCN            | 89                         | 35  | 76                                         | 1 : 6                         |
| 21 <sup>d</sup>                                                                                                                                                                                                                                                                                                                                                                                                                                                                                                                                                                                                                                                                                                                                                                                                      | 2       | MeCN            | 87                         | 18  | 95                                         | 1 : 6                         |
| 22 <sup>d</sup>                                                                                                                                                                                                                                                                                                                                                                                                                                                                                                                                                                                                                                                                                                                                                                                                      | Average | MeCN            | 88                         | 27  | 85                                         | 1 : 6                         |

<sup>a</sup> <sup>19</sup>F NMR yields calibrated against C<sub>6</sub>H<sub>5</sub>F as an internal standard. <sup>b</sup>PC = propylene carbonate. <sup>c</sup>Pd(COD)(CH<sub>2</sub>TMS)<sub>2</sub> was omitted from the reaction mixture. <sup>d</sup>Reaction time = 1 h.

**Discussion:** The selectivities shown in Table S16 qualitatively match the selectivity observed in the stoichiometric oxidative additions of **3a/3b** and **1**. However, more reaction of chloride (**S15a**) is observed in MeCN (entry 6) than expected based on the results with **3a/3b** (i.e., the selectivity in MeCN appears much worse for the *p*-CF<sub>3</sub> substrates compared to the *o*-CF<sub>3</sub> substrates). The selectivity is better at shorter reaction time (1 h, entry 22). On closer examination it appears that the substrates, especially **S15a**, undergo a background reaction in the absence of

palladium (see entries 14-19). The  $^{31}\text{P}$  NMR spectra reveals at least 2 new signals (Figure S8), suggesting that the substrate(s) can react with  $\text{P}^t\text{Bu}_3$ , a process that is apparently hindered by *ortho* substituents in **3a** and **3b** (comparable signals are never detected in the reactions of **3a** and **3b**).

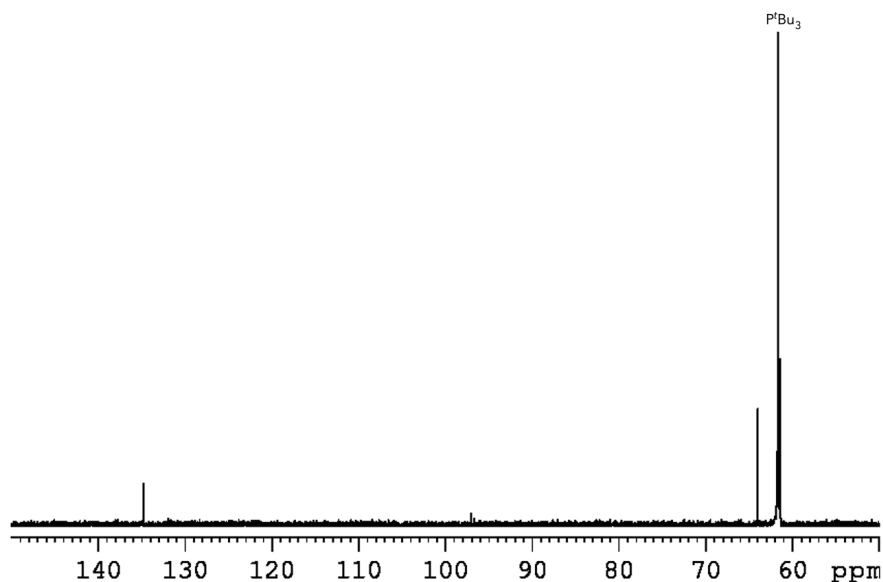

**Figure S8.**  $^{31}\text{P}$  NMR spectrum of Pd-free control reaction of **S15a** + **S15b** with  $\text{P}^t\text{Bu}_3$  in MeCN.

See pages S144-S153 for the NMR spectra corresponding to the experiments in Table S16.

## F. Stille Cross-Couplings

### 1. Reactions of **1** (Scheme 3)

In a nitrogen filled glovebox,  $\text{Pd}_2\text{dba}_3$  (0.5 mg, 0.0006 mmol, 0.75 mol %),  $\text{Pd}(\text{P}^t\text{Bu}_3)_2$  (0.6 mg, 0.0012 mmol, 1.5 mol %), and  $\text{KPF}_6$  (44.2 mg, 0.24 mmol, 3 equiv) were combined in a 1-dram vial equipped with a magnetic stir bar. Trialkylphenyl stannane (0.088 mmol, 1.1 equiv), **1** (14  $\mu\text{L}$ , 0.08 mmol, 1 equiv), and DMF (150  $\mu\text{L}$ ) were added. The vial was immediately sealed with a PTFE-lined cap and removed from the glovebox, and the reaction was stirred at the indicated temperature for 24 h. Dodecane (8.0  $\mu\text{L}$ ) was added to the reaction mixture as an internal standard, and the mixture was diluted with EtOAc. A small aliquot was removed and filtered through celite, and the celite was washed with additional EtOAc. The filtrate was analyzed by gas chromatography. (**Safety Note:** Organostannanes and their byproducts are toxic and should be handled in a fumehood or glovebox. For reactions utilizing fluoride bases, quenching crude reaction mixtures via acidification<sup>20</sup> prior to disposal is undesirable due to the additional hazard of generating hydrogen fluoride.)

**Table S17.** Base-Free Stille Coupling of **1**<sup>a</sup>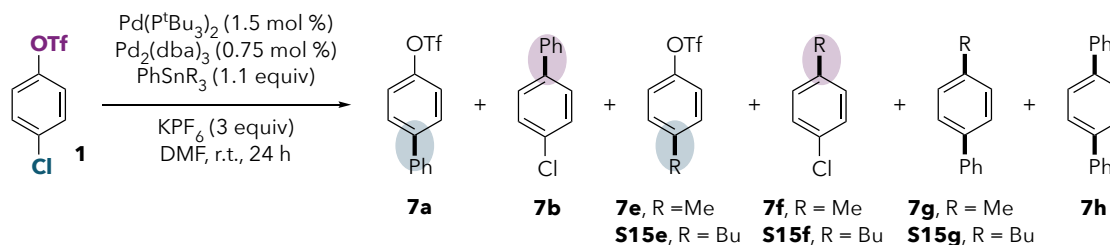

**S15g** was identified based on MS but has not been isolated. **S15e** and **S15f** are hypothetical and were not detected.

| entry | Trial   | R            | temperature | <b>1</b> (%) | <b>7a</b> (%) | <b>7b</b> (%) | <b>e</b> (%) | <b>f</b> (%) | <b>g</b> (%) | <b>7h</b> (%) |
|-------|---------|--------------|-------------|--------------|---------------|---------------|--------------|--------------|--------------|---------------|
| 1     | 1       | <i>n</i> -Bu | r.t.        | 86           | 5             | 4             | n.d.         | n.d.         | trace        | 0             |
| 2     | 2       | <i>n</i> -Bu | r.t.        | 80           | 4             | 4             | n.d.         | n.d.         | trace        | 0             |
| 3     | Average | <i>n</i> -Bu | r.t.        | 83           | 5             | 4             | n.d.         | n.d.         | trace        | 0             |
| 4     | 1       | <i>n</i> -Bu | 100 °C      | 71           | 14            | 2             | n.d.         | n.d.         | trace        | 0             |
| 5     | 2       | <i>n</i> -Bu | 100 °C      | 76           | 14            | 2             | n.d.         | n.d.         | trace        | 0             |
| 6     | Average | <i>n</i> -Bu | 100 °C      | 74           | 14            | 2             | n.d.         | n.d.         | trace        | 0             |
| 7     | 1       | Me           | r.t.        | 87           | 2             | 4             | 2            | 2            | 2            | 0             |
| 8     | 2       | Me           | r.t.        | 80           | 3             | 4             | 2            | 3            | 2            | 0             |
| 9     | Average | Me           | r.t.        | 83           | 2             | 4             | 2            | 3            | 2            | 0             |
| 10    | 1       | Me           | 100 °C      | 7            | 42            | 5             | 20           | 4            | 4            | 5             |
| 11    | 2       | Me           | 100 °C      | 1            | 36            | 4             | 21           | 4            | 6            | 7             |
| 12    | Average | Me           | 100 °C      | 4            | 39            | 3             | 20           | 4            | 5            | 6             |

<sup>a</sup>GC yields calibrated against dodecane as an internal standard. Trace = a minor signal with the expected mass for this compound was detected by GCMS, although no authentic material was available for calibration. n.d. = not detected by GCMS.

## 2. Reactions of **8** (Table 5)

**General Procedure:** In a nitrogen filled glovebox,  $\text{Pd}_2\text{dba}_3$  (1.1 mg, 0.0012 mmol, 1.5 mol %),  $\text{Pd}(\text{P}^t\text{Bu}_3)_2$  (1.2 mg, 0.0024 mmol, 3.0 mol %), and  $\text{KPF}_6$  (44.2 mg, 0.24 mmol, 3 equiv) were combined in a 1-dram vial equipped with a magnetic stir bar. Trialkylphenyl stannane (0.088 mmol, 1.1 equiv), **8** (16  $\mu\text{L}$ , 0.08 mmol, 1 equiv), and DMF (150  $\mu\text{L}$ ) were added. The vial was immediately sealed with a PTFE-lined cap and removed from the glovebox, and the reaction was stirred at the indicated temperature for 24 h. Undecane (7.5  $\mu\text{L}$ ) was added to the reaction mixture as an internal standard, and the mixture was diluted with EtOAc. A small aliquot was removed and filtered through celite, and the celite was washed with additional EtOAc. The filtrate was analyzed by gas chromatography.

**Table S18.** Base-Free Stille Coupling of **8**<sup>a</sup>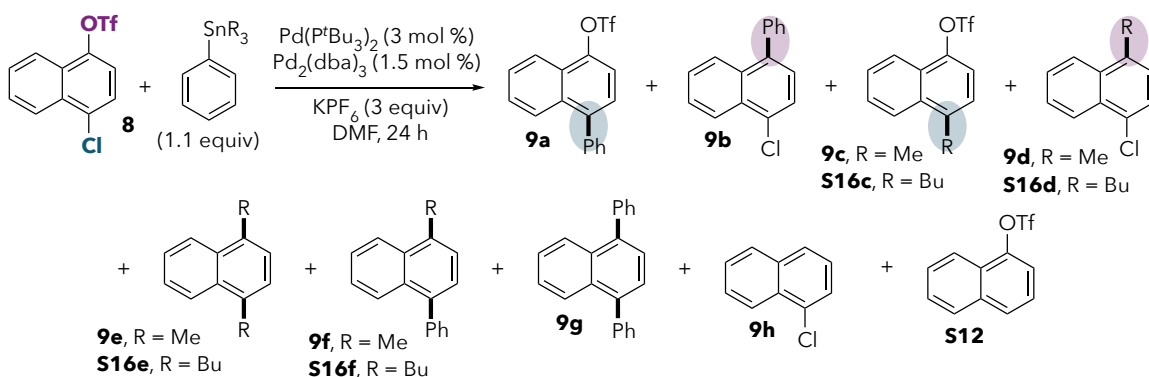

**S16c** and **S16f** were identified based on MS but have not been isolated. **S16d** and **S16e** are hypothetical and were not detected.

| entry           | trial   | R            | temperature | <b>8</b><br>(%) | <b>9a</b><br>(%) | <b>9b</b><br>(%) | <b>c</b><br>(%) | <b>d</b><br>(%) | <b>e</b><br>(%) | <b>f</b> (%) | <b>9g</b><br>(%) | <b>9h</b><br>(%) | <b>S12</b><br>(%) |
|-----------------|---------|--------------|-------------|-----------------|------------------|------------------|-----------------|-----------------|-----------------|--------------|------------------|------------------|-------------------|
| 1               | 1       | <i>n</i> -Bu | r.t.        | 79              | 4                | 5                | trace           | n.d.            | n.d.            | trace        | 1                | 1                | <1                |
| 2               | 2       | <i>n</i> -Bu | r.t.        | 80              | 4                | 5                | trace           | n.d.            | n.d.            | trace        | 1                | 1                | <1                |
| 3               | Average | <i>n</i> -Bu | r.t.        | 80              | 4                | 5                | trace           | n.d.            | n.d.            | trace        | 1                | 1                | <1                |
| 4               | 1       | <i>n</i> -Bu | 100 °C      | 15              | 19               | 11               | trace           | n.d.            | n.d.            | trace        | 10               | 1                | <1                |
| 5               | 2       | <i>n</i> -Bu | 100 °C      | 39              | 30               | 8                | trace           | n.d.            | n.d.            | trace        | 4                | 1                | <1                |
| 6               | Average | <i>n</i> -Bu | 100 °C      | 27              | 25               | 10               | trace           | n.d.            | n.d.            | trace        | 7                | 1                | <1                |
| 7               | 1       | Me           | r.t.        | 24              | 1                | 10               | 3               | 39              | 1               | 1            | 1                | 1                | <1                |
| 8               | 2       | Me           | r.t.        | 24              | 1                | 9                | 3               | 37              | 1               | 1            | 1                | 1                | <1                |
| 9               | Average | Me           | r.t.        | 24              | 1                | 9                | 3               | 42              | 1               | 1            | 1                | 1                | <1                |
| 10              | 1       | Me           | 100 °C      | 2               | 14               | 5                | 31              | 12              | 2               | 8            | 8                | 1                | <1                |
| 11              | 2       | Me           | 100 °C      | 1               | 13               | 4                | 35              | 12              | 1               | 9            | 9                | 1                | <1                |
| 12              | Average | Me           | 100 °C      | 1               | 13               | 4                | 33              | 12              | 1               | 8            | 9                | 1                | <1                |
| 13 <sup>b</sup> | 1       | Me           | r.t.        | 11              | 1                | 12               | 4               | 54              | 12              | 1            | 1                | 8                | <1                |
| 14 <sup>b</sup> | 2       | Me           | r.t.        | 11              | 2                | 12               | 4               | 50              | 13              | 1            | 1                | 4                | <1                |
| 15 <sup>b</sup> | Average | Me           | r.t.        | 11              | 1                | 12               | 4               | 52              | 12              | 1            | 1                | 6                | <1                |

<sup>a</sup>GC yields calibrated against undecane as an internal standard. Average of two runs. Trace = a minor signal with the expected mass for this compound was detected by GCMS, although no authentic material was available for calibration. n.d. = not detected by GCMS. <sup>b</sup>KPF<sub>6</sub> was omitted from the reaction mixture.

### 3. Independent Reactions of an Aryl Chloride and an Aryl Triflate

**General Procedure:** In a nitrogen filled glovebox,  $\text{Pd}_2(\text{dba})_3$  (0.5 mg, 0.0006 mmol, 0.75 mol %),  $\text{Pd}(\text{P}^t\text{Bu}_3)_2$  (0.6 mg, 0.0012 mmol, 1.5 mol %), and  $\text{KPF}_6$  (44.2 mg, 0.24 mmol, 3 equiv) were combined in a 1-dram vial equipped with a magnetic stir bar. Trimethylphenyl stannane (16  $\mu\text{L}$ , 0.088 mmol, 1.1 equiv), 1-substituted naphthalene substrate (0.08 mmol, 1 equiv), and DMF (150  $\mu\text{L}$ ) were added. The vial was immediately sealed with a PTFE-lined cap and removed from the glovebox, and the reaction was stirred at the indicated temperature for 24 h. Undecane (7.5  $\mu\text{L}$ ) was added to the reaction mixture as an internal standard, and the mixture was diluted with EtOAc. A small aliquot was removed and filtered through celite, and the celite was washed with additional EtOAc. The filtrate was analyzed by gas chromatography.

**Table S19.** Stille Cross-Couplings of 1-Chloronaphthalene and **S12** Tracked Over Time<sup>a</sup>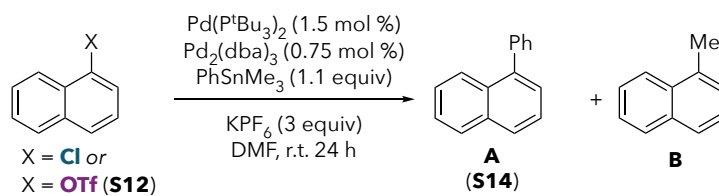

| entry | X   | temp (°C) | time (h) | A (%) | B (%) | ratio A/B | total product (A+B) |
|-------|-----|-----------|----------|-------|-------|-----------|---------------------|
| 1     | Cl  | r.t.      | 2        | 2     | 0     | --        | 2                   |
| 2     | Cl  | r.t.      | 4        | 2     | 0     | --        | 2                   |
| 3     | Cl  | r.t.      | 8        | 2     | 1     | 2.0       | 3                   |
| 4     | Cl  | r.t.      | 16       | 3     | 2     | 1.5       | 5                   |
| 5     | Cl  | r.t.      | 24       | 3     | 3     | 1.0       | 6                   |
| 6     | Cl  | 100       | 2        | 35    | 31    | 1.1       | 66                  |
| 7     | Cl  | 100       | 4        | 42    | 34    | 1.2       | 76                  |
| 8     | Cl  | 100       | 8        | 36    | 35    | 1.0       | 71                  |
| 9     | Cl  | 100       | 16       | 42    | 31    | 1.4       | 73                  |
| 10    | Cl  | 100       | 24       | 45    | 37    | 1.2       | 82                  |
| 11    | OTf | r.t.      | 2        | 3     | 2     | 1.5       | 5                   |
| 12    | OTf | r.t.      | 4        | 3     | 3     | 1.0       | 6                   |
| 13    | OTf | r.t.      | 8        | 5     | 6     | 0.8       | 11                  |
| 14    | OTf | r.t.      | 16       | 9     | 11    | 0.8       | 20                  |
| 15    | OTf | r.t.      | 24       | 10    | 11    | 0.9       | 21                  |
| 16    | OTf | 100       | 2        | 44    | 38    | 1.2       | 82                  |
| 17    | OTf | 100       | 4        | 44    | 37    | 1.2       | 81                  |
| 18    | OTf | 100       | 8        | 51    | 40    | 1.3       | 91                  |
| 19    | OTf | 100       | 16       | 50    | 39    | 1.3       | 89                  |
| 20    | OTf | 100       | 24       | 47    | 42    | 1.1       | 89                  |

<sup>a</sup>GC yields calibrated against undecane as an internal standard. Results of a single trial.

**Discussion:** The results suggest that an aryl triflate reacts with faster initial rate than an aryl chloride at both room temperature and at 100 °C in the base-free Stille cross-coupling in DMF. There is no clear trend in the ratio of phenylation versus methylation.

#### 4. *Efforts to Reproduce Literature<sup>21</sup> Results for the Base-Free Stille Coupling of 1*

For the room-temperature base-free coupling of **1** with PhSnBu<sub>3</sub> catalyzed by Pd<sub>2</sub>(dba)<sub>3</sub>/P<sup>t</sup>Bu<sub>3</sub>, the literature reports a **1**:**7a**:**7b** ratio of 45:47:8. We have been unable to reproduce this ratio. In an effort to control for possible variables, we evaluated different sources of most reagents (Table S20). Additionally, six different chemists across three different labs, including our own, set up the reaction using the exact conditions reported (e.g., same scale, same Pd and ligand source, same reaction time; Table S21). As shown below, none of these efforts enabled us to reproduce the literature report.

Procedure for Table S20: In a nitrogen filled glovebox, Pd<sub>2</sub>dba<sub>3</sub> (0.5 mg, 0.0006 mmol, 0.75 mol %), Pd(P<sup>t</sup>Bu<sub>3</sub>)<sub>2</sub> (0.6 mg, 0.0012 mmol, 1.5 mol %), and KPF<sub>6</sub> (44.2 mg, 0.24 mmol, 3 equiv) were combined in a 1-dram vial equipped with a magnetic stir bar. Tributylphenyl stannane (28 μL, 0.088 mmol, 1.1 equiv), **1** (14 μL, 0.08 mmol), and DMF (150 μL) were added. The vial was immediately sealed with a PTFE-lined cap and removed from the glovebox, and the reaction was stirred at room temperature for 24 h. Dodecane (8.0 μL) was added to the reaction mixture as an internal standard, and the mixture was diluted with EtOAc. A small aliquot was removed and filtered through celite, and the celite was washed with additional EtOAc. The filtrate was analyzed by gas chromatography.

Procedure for Table S21: Six chemists in three organometallic chemistry research groups were recruited to attempt to reproduce the literature results of the base-free Stille coupling of **1** by following the procedure described in Table 3, entry 1 of reference 21, on the same scale described in the literature (0.65 mmol of **1**). The only alterations to the reported procedure are as follows: (1) an aqueous workup was not performed for entries 1 and 4-8 in Table S14 below, and (2) dodecane was used as the internal standard for calibrated GC yields instead of mesitylene, the standard reported in the literature. Dodecane was added to the reaction mixture after the 38-hour reaction time. For the table entries without an aqueous workup, the mixture was diluted with EtOAc. A small aliquot was removed and filtered through celite, and the celite was washed with additional EtOAc. The filtrate was analyzed by gas chromatography. The preparation method for **1** is noted below. The chemists outside of our own laboratory ordered new bottles of all commercial reagents for use in these studies.

**Table S20.** Varying Material Sources in Stille Cross-Coupling of **1**<sup>a</sup>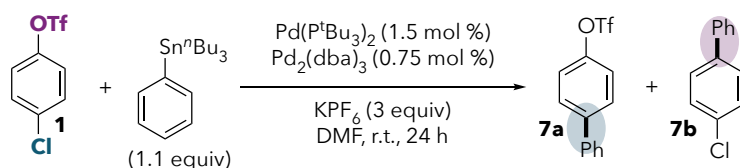

| entry | $\text{Pd}_2\text{dba}_3$<br>source | $\text{Pd}_2\text{dba}_3$<br>purity <sup>b</sup> | $\text{KPF}_6$<br>source | $\text{Bu}_3\text{SnPh}$<br>source | literature<br>procedure<br>used<br>to prepare <b>1</b> | DMF<br>source            | trial   | <b>1</b> | <b>7a</b> | <b>7b</b> |
|-------|-------------------------------------|--------------------------------------------------|--------------------------|------------------------------------|--------------------------------------------------------|--------------------------|---------|----------|-----------|-----------|
| 1     | Aldrich                             | 31%                                              | Oakwood                  | Aldrich                            | ref. 6                                                 | solvent system           | 1       | 84       | 4         | 3         |
| 2     | Aldrich                             | 31%                                              | Oakwood                  | Aldrich                            | ref. 6                                                 | solvent system           | 2       | 88       | 3         | 3         |
| 3     | Aldrich                             | 31%                                              | Oakwood                  | Aldrich                            | ref. 6                                                 | solvent system           | Average | 86       | 4         | 3         |
| 4     | Aldrich                             | 30%                                              | Oakwood                  | Aldrich                            | ref. 6                                                 | solvent system           | 1       | 88       | 4         | 3         |
| 5     | Aldrich                             | 30%                                              | Oakwood                  | Aldrich                            | ref. 6                                                 | solvent system           | 2       | 88       | 4         | 4         |
| 6     | Aldrich                             | 30%                                              | Oakwood                  | Aldrich                            | ref. 6                                                 | solvent system           | Average | 88       | 4         | 3         |
| 7     | Aldrich                             | 30 %                                             | Oakwood                  | Alfa Aesar                         | ref. 6                                                 | solvent system           | 1       | 88       | 3         | 3         |
| 8     | Aldrich                             | 30 %                                             | Oakwood                  | Alfa Aesar                         | ref. 6                                                 | solvent system           | 2       | 88       | 4         | 3         |
| 9     | Aldrich                             | 30 %                                             | Oakwood                  | Alfa Aesar                         | ref. 6                                                 | solvent system           | Average | 88       | 3         | 3         |
| 10    | Aldrich                             | 69%                                              | Oakwood                  | Alfa Aesar                         | ref. 6                                                 | solvent system           | 1       | 87       | 4         | 3         |
| 11    | Aldrich                             | 69%                                              | Oakwood                  | Alfa Aesar                         | ref. 6                                                 | solvent system           | 2       | 89       | 3         | 3         |
| 12    | Aldrich                             | 69%                                              | Oakwood                  | Alfa Aesar                         | ref. 6                                                 | solvent system           | Average | 89       | 4         | 3         |
| 13    | Strem                               | 63%                                              | Oakwood                  | Alfa Aesar                         | ref. 6                                                 | solvent system           | 1       | 88       | 3         | 3         |
| 14    | Strem                               | 63%                                              | Oakwood                  | Alfa Aesar                         | ref. 6                                                 | solvent system           | 2       | 88       | 3         | 3         |
| 15    | Strem                               | 63%                                              | Oakwood                  | Alfa Aesar                         | ref. 6                                                 | solvent system           | Average | 88       | 3         | 3         |
| 16    | prepared in-house<br>(ref. 22)      | 27%                                              | Oakwood                  | Alfa Aesar                         | ref. 6                                                 | solvent system           | 1       | 88       | 3         | 3         |
| 17    | prepared in-house<br>(ref.22)       | 27%                                              | Oakwood                  | Alfa Aesar                         | ref. 6                                                 | solvent system           | 2       | 88       | 4         | 3         |
| 18    | prepared in-house<br>(ref.22)       | 27%                                              | Oakwood                  | Alfa Aesar                         | ref. 6                                                 | solvent system           | Average | 88       | 3         | 3         |
| 19    | Aldrich                             | 30%                                              | Aldrich <sup>c</sup>     | Alfa Aesar                         | ref. 6                                                 | solvent system           | 1       | 92       | 3         | 3         |
| 20    | Aldrich                             | 30%                                              | Aldrich <sup>c</sup>     | Alfa Aesar                         | ref. 6                                                 | solvent system           | 2       | 88       | 3         | 3         |
| 21    | Aldrich                             | 30%                                              | Aldrich <sup>c</sup>     | Alfa Aesar                         | ref. 6                                                 | solvent system           | Average | 90       | 3         | 3         |
| 22    | Aldrich                             | 30%                                              | Alfa Aesar               | Alfa Aesar                         | ref. 6                                                 | solvent system           | 1       | 92       | 3         | 3         |
| 23    | Aldrich                             | 30%                                              | Alfa Aesar               | Alfa Aesar                         | ref. 6                                                 | solvent system           | 2       | 89       | 3         | 3         |
| 24    | Aldrich                             | 30%                                              | Alfa Aesar               | Alfa Aesar                         | ref. 6                                                 | solvent system           | Average | 90       | 3         | 3         |
| 25    | Aldrich                             | 30%                                              | Oakwood                  | Alfa Aesar                         | ref. 6                                                 | new, sealed <sup>d</sup> | 1       | 89       | 4         | 4         |
| 26    | Aldrich                             | 30%                                              | Oakwood                  | Alfa Aesar                         | ref. 6                                                 | new, sealed <sup>d</sup> | 2       | 89       | 4         | 4         |
| 27    | Aldrich                             | 30%                                              | Oakwood                  | Alfa Aesar                         | ref. 6                                                 | new, sealed <sup>d</sup> | Average | 89       | 4         | 4         |
| 28    | Aldrich                             | 30%                                              | Oakwood                  | Alfa Aesar                         | ref. 21                                                | solvent system           | 1       | 89       | 1         | 2         |
| 29    | Aldrich                             | 30%                                              | Oakwood                  | Alfa Aesar                         | ref. 21                                                | solvent system           | 2       | 90       | 2         | 2         |
| 30    | Aldrich                             | 30%                                              | Oakwood                  | Alfa Aesar                         | ref. 21                                                | solvent system           | Average | 89       | 1         | 2         |

<sup>a</sup> GC yields calibrated against undecane as an internal standard. Average of two runs. <sup>b</sup> Purity was determined by <sup>1</sup>H NMR in  $\text{CDCl}_3$  by the method in reference 23. <sup>c</sup> 99.5 % trace metals basis  $\text{KPF}_6$ . <sup>d</sup> Newly-opened bottle of DMF in an AcroSeal bottle from Acros Organics was used.

**Table S21.** Impact of Chemist and Workup Procedure in Stille Cross-Coupling of **1**<sup>a</sup>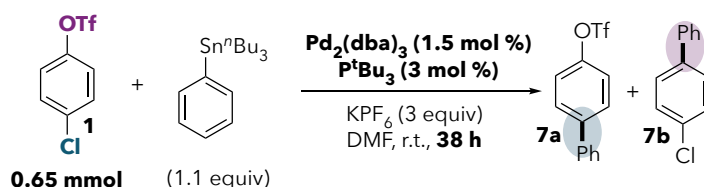

| entry | chemist | literature procedure used to prepare <b>1</b> | workup chemist | aqueous workup? <sup>b</sup> | extra additive?                   | <b>1</b> | <b>7a</b> | <b>7b</b> |
|-------|---------|-----------------------------------------------|----------------|------------------------------|-----------------------------------|----------|-----------|-----------|
| 1     | A       | ref. 21                                       | A              | no                           | no                                | 89       | 2         | 2         |
| 2     | A       | ref. 21                                       | A              | yes                          | no                                | 76       | 3         | 2         |
| 3     | A       | ref. 21                                       | A              | yes                          | mesitylene (1 equiv) <sup>c</sup> | 84       | 3         | 2         |
| 4     | B       | ref. 6                                        | B              | no                           | no                                | 85       | 6         | 3         |
| 5     | C       | ref. 6                                        | C              | no                           | no                                | 94       | 2         | 2         |
| 6     | D       | ref. 21                                       | D              | no                           | no                                | 86       | 6         | 3         |
| 7     | E       | ref. 21                                       | A              | no                           | no                                | 77       | 10        | 6         |
| 8     | F       | ref. 21                                       | A              | no                           | no                                | 89       | 3         | 3         |

<sup>a</sup>GC yields calibrated against dodecane as an internal standard. Results of a single run. <sup>b</sup>When indicated, the aqueous workup was performed after adding internal standard (dodecane) and followed the procedure described in reference 21. <sup>c</sup>Mesitylene, which is the internal GCMS standard used in reference 21, was added with the other liquid reagents prior to the start of the reaction.

**Discussion:** As shown in Table S20, the Pd source and its purity, the KPF<sub>6</sub> source, the Bu<sub>3</sub>SnPh source, the DMF source, and the preparation method for **1** did not have a significant effect on the reaction yields in our hands. Furthermore, there was little variation among the different chemists (Table S21). The total yield of products **7a** + **7b** ranged from 4–16% yield, and the remaining starting material ranged from 77–94% based on calibrated GC.

## G. Evaluation of Alternative Hypotheses

### 1. Alternative Hypothesis: Is Solvent Effect Related to KF Solubility?

**Hypothesis:** We evaluated an alternative hypothesis for the observed solvent effect wherein better solubility of KF promotes formation of anionic bisligated [Pd(P<sup>t</sup>Bu<sub>3</sub>)(F)]<sup>-</sup>, which in turn favors reaction at triflate.

**General Procedure:** Without exclusion of air or moisture, P<sup>t</sup>Bu<sub>3</sub>-Pd-G4 (1.5 mg, 0.0026 mmol, 3 mol %), *o*-tolyl boronic acid (11.0 mg, 0.081 mmol, 1.01 equiv), and KF (13.9 mg, 0.24 mmol, 3 equiv) were combined in a 1-dram vial equipped with a magnetic stir bar. In rapid succession, water (1.4 μL, 0.08 mmol, 1 equiv), 4-chlorophenyl triflate (14 μL, 0.08 mmol, 1 equiv), and solvent (150 μL) were added to the vial and the mixture was immediately sparged with nitrogen for two minutes. The sparging needle and septum was quickly replaced with a PTFE-lined cap and the reaction was stirred vigorously at the indicated temperature for 24 h. Undecane (7.5 μL) was added to the reaction mixture as an internal standard, and the mixture was diluted with EtOAc. A small aliquot was removed and filtered through celite, and the celite was washed with additional EtOAc. The filtrate was analyzed by gas chromatography.

**Table S22.** Comparing Selectivity to KF Solubility.<sup>a</sup>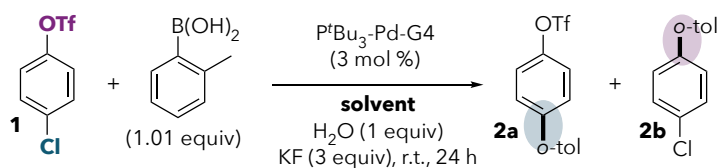

| entry | solvent                  | KF solubility<br>(g KF/100 g solvent,<br>20-25 °C) <sup>b</sup> | reference for<br>solubility data | trial   | <b>1</b> (%) | <b>2a</b> (%) | <b>2b</b> (%) |
|-------|--------------------------|-----------------------------------------------------------------|----------------------------------|---------|--------------|---------------|---------------|
| 1     | H <sub>2</sub> O         | 102                                                             | 24                               | 1       | 22           | 55            | 0             |
| 2     | H <sub>2</sub> O         | 102                                                             | 24                               | 2       | 35           | 64            | 0             |
| 3     | H <sub>2</sub> O         | 102                                                             | 24                               | Average | 28           | 59            | 0             |
| 4     | THF                      | 0.85                                                            | 25                               | 1       | 5            | 63            | <1            |
| 5     | THF                      | 0.85                                                            | 25                               | 2       | 23           | 72            | <1            |
| 6     | THF                      | 0.85                                                            | 25                               | 3       | 26           | 68            | 1             |
| 7     | THF                      | 0.85                                                            | 25                               | 4       | 25           | 71            | 1             |
| 8     | THF                      | 0.85                                                            | 25                               | 5       | 27           | 75            | 1             |
| 9     | THF                      | 0.85                                                            | 25                               | 6       | 24           | 79            | 1             |
| 10    | THF                      | 0.85                                                            | 25                               | 7       | 20           | 78            | 1             |
| 11    | THF                      | 0.85                                                            | 25                               | 8       | 18           | 79            | 1             |
| 12    | THF                      | 0.85                                                            | 25                               | Average | 20           | 74            | <1            |
| 13    | DMF                      | 7.0 x 10 <sup>-3</sup>                                          | 24                               | 1       | 16           | 9             | 58            |
| 14    | DMF                      | 7.0 x 10 <sup>-3</sup>                                          | 24                               | 2       | 19           | 9             | 61            |
| 15    | DMF                      | 7.0 x 10 <sup>-3</sup>                                          | 24                               | 3       | 24           | 11            | 59            |
| 16    | DMF                      | 7.0 x 10 <sup>-3</sup>                                          | 24                               | 4       | 26           | 11            | 59            |
| 17    | DMF                      | 7.0 x 10 <sup>-3</sup>                                          | 24                               | 5       | 16           | 12            | 66            |
| 18    | DMF                      | 7.0 x 10 <sup>-3</sup>                                          | 24                               | 6       | 20           | 11            | 62            |
| 19    | DMF                      | 7.0 x 10 <sup>-3</sup>                                          | 24                               | Average | 23           | 10            | 60            |
| 20    | MeCN                     | 3.6 x 10 <sup>-3</sup>                                          | 24                               | 1       | 8            | 2             | 75            |
| 21    | MeCN                     | 3.6 x 10 <sup>-3</sup>                                          | 24                               | 2       | 8            | 2             | 78            |
| 22    | MeCN                     | 3.6 x 10 <sup>-3</sup>                                          | 24                               | Average | 8            | 2             | 77            |
| 23    | acetone                  | 2.2 x 10 <sup>-5</sup>                                          | 24                               | 1       | 16           | 72            | 3             |
| 24    | acetone                  | 2.2 x 10 <sup>-5</sup>                                          | 24                               | 2       | 26           | 63            | 4             |
| 25    | acetone                  | 2.2 x 10 <sup>-5</sup>                                          | 24                               | Average | 21           | 68            | 4             |
| 26    | propylene carbonate (PC) | 2.0 x 10 <sup>-7</sup>                                          | 26                               | 1       | 9            | 57            | 6             |
| 27    | propylene carbonate (PC) | 2.0 x 10 <sup>-7</sup>                                          | 26                               | 2       | 23           | 68            | 6             |
| 28    | propylene carbonate (PC) | 2.0 x 10 <sup>-7</sup>                                          | 26                               | 3       | 12           | 75            | 5             |
| 29    | propylene carbonate (PC) | 2.0 x 10 <sup>-7</sup>                                          | 26                               | 4       | 19           | 68            | 6             |
| 30    | propylene carbonate (PC) | 2.0 x 10 <sup>-7</sup>                                          | 26                               | Average | 16           | 67            | 6             |

<sup>a</sup>GC yields calibrated against undecane as an internal standard. Diarylated product observed in ≤4% yield in all cases.

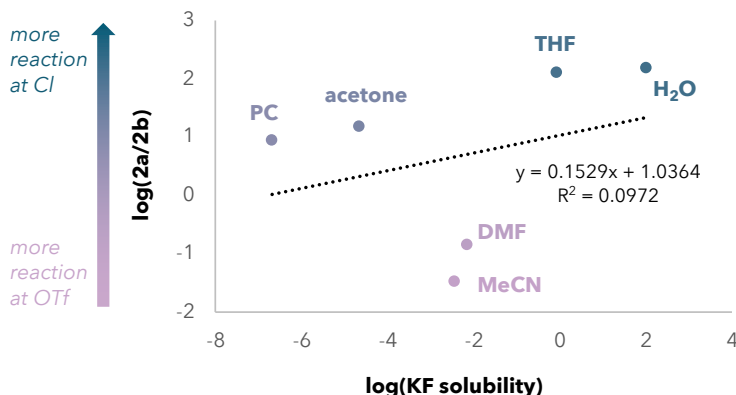

**Figure S9.** No correlation between KF solubility and selectivity is observed in six representative solvents.

**Discussion:** Solubility data and selectivity were plotted on a linear free energy relationship diagram (Table S22 and Figure S9). For six representative solvents, in which KF solubility is known, there is no trend between solubility and selectivity. As such, it does not appear that fluoride availability is responsible for the observed solvent effects.

## 2. Alternative Hypothesis: Is Oxidative Addition Reversible (Curtin-Hammett)?

**Hypothesis:** We considered a scenario in which the previously reported difference between the Suzuki and Stille selectivities<sup>21</sup> relates to reversible oxidative addition. If transmetalation with organostannane reagents is sufficiently slow, and oxidative addition is reversible, then the Stille reaction kinetics would fall into a Curtin-Hammett regime wherein transmetalation would actually be the selectivity-determining step. For this scenario to serve as an explanation for why chloride-selectivity was reported in the base-free Stille coupling in DMF, despite the observation that stoichiometric oxidative addition occurs preferentially at C—OTf in this solvent, oxidative addition of triflate must be reversible and transmetalation at  $P^tBu_3Pd(Ar)Cl$  must be faster than at a putative  $P^tBu_3Pd(Ar)OTf$  intermediate. To evaluate this hypothesis, we conducted an experiment using an aryl nonaflate in the presence of triflate anion designed to look for reversible oxidative addition of fluorinated sulfonates. Successful oxidative addition of **S11**, followed by exchange of  $-ONf$  for  $-OTf$  at palladium and C—O bond-forming reductive elimination would result in product **3b**. We hypothesized that this process could be tracked by  $^{19}F$  NMR, since  $NBu_4OTf$  (-77.4 ppm) would be consumed and peaks corresponding to product **3b** (diagnostic signal at -73.3 ppm) would appear.

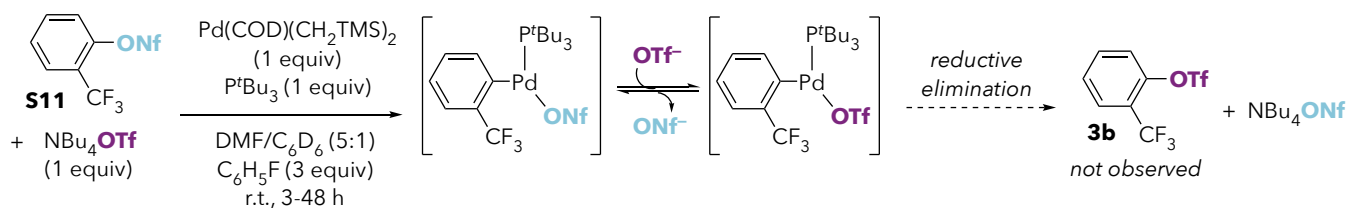

**Procedure:** Inside a nitrogen-filled glovebox,  $\text{P}^t\text{Bu}_3$  (5.5 mg, 0.027 mmol, 1 equiv),  $\text{Pd}(\text{COD})(\text{CH}_2\text{TMS})_2$  (10.5 mg, 0.027 mmol, 1 equiv), and  $\text{NBu}_4\text{OTf}$  (10.6 mg, 0.027 mmol, 1 equiv) were combined in a 1-dram vial equipped with a stir bar. In a separate vial, a solution was prepared of **S11** (0.027 mmol, 1 equiv),  $\text{C}_6\text{H}_5\text{F}$  (7.6  $\mu\text{L}$ , 0.081 mmol, 3 equiv) in  $\text{C}_6\text{D}_6$  (100  $\mu\text{L}$ ).  $\text{DMF}$  (500  $\mu\text{L}$ ) was added to the vial containing Pd, followed by the entire volume of the substrate solution. The vial was sealed with a PTFE-lined cap and the reaction was allowed to stir for 3-48 h at room temperature. The reaction mixture was transferred via Pasteur pipette into an NMR tube. The tube was capped tightly, removed from the glovebox, and immediately analyzed by  $^{19}\text{F}$  NMR.

**Results and Discussion:** The NMR spectra from these experiments show evidence of oxidative addition of **S11** based on decrease in the signals corresponding to this compound, but **3b** is not detected after 3 hours, nor after extended reaction time (up to 48 h). We conclude from these results that reductive elimination of  $\text{C}-\text{OTf}$  is unlikely to occur in polar coordinating solvent at room temperature. As such, a Curtin-Hammett scenario involving rapid equilibrium between oxidative addition adducts  $[\text{Pd}(\text{P}^t\text{Bu}_3)(\text{Ar})(\text{Cl})]$  and  $[\text{Pd}(\text{P}^t\text{Bu}_3)(\text{Ar})(\text{OTf})]$  is not feasible. This conclusion is consistent with the dearth of literature examples of  $\text{C}_{(\text{sp}^2)}-\text{O}$  reductive elimination from  $\text{Pd}(\text{II})$ . Furthermore, DFT calculations suggest that oxidative addition of both  $\text{C}-\text{OTf}$  and  $\text{C}-\text{Cl}$  at  $[\text{Pd}(\text{P}^t\text{Bu}_3)]$  is highly exergonic and unlikely to be reversible based on the calculated free energy barriers for the reverse reaction (see Figure 2 of the manuscript).

See pages S154-S155 for the  $^{19}\text{F}$  NMR spectra corresponding to these experiments.

### 3. Alternative Hypothesis: "Greasy Tin Hypothesis"

**Hypothesis:** We considered an alternative hypothesis to explain the previously-reported anomalous solvent effects in the Stille coupling. In this hypothesis, we envisioned that the greasy organostannane reagents could modulate the polarity of the reaction medium (for example, oxidative addition could take place within nonpolar micelles rather than within the bulk reaction medium). To test this hypothesis, stoichiometric oxidative addition studies were conducted in DMF at room temperature in the presence of  $\text{SnBu}_4$  (a reagent that is structurally similar to  $\text{Bu}_3\text{SnPh}$  but is unlikely to undergo transmetallation).

**Procedure:** Inside a nitrogen-filled glovebox,  $\text{P}^t\text{Bu}_3$  (5.5 mg, 0.027 mmol, 1 equiv) and  $\text{Pd}(\text{COD})(\text{CH}_2\text{TMS})_2$  (10.5 mg, 0.027 mmol, 1 equiv) were combined in a 1-dram vial equipped with a stir bar. In a separate vial, a solution was prepared of **3a** (3.6  $\mu\text{L}$ , 0.027 mmol, 1 equiv), **3b** (5.0  $\mu\text{L}$ , 0.027 mmol, 1 equiv),  $\text{C}_6\text{H}_5\text{F}$  (7.6  $\mu\text{L}$ , 0.081 mmol, 3 equiv), and  $\text{SnBu}_4$  (8.9  $\mu\text{L}$  – 88.9  $\mu\text{L}$ , 0.027 – 0.27 mmol, 1-10 equiv) in  $\text{C}_6\text{D}_6$  (100  $\mu\text{L}$ ). DMF (500  $\mu\text{L}$ ) was added to the vial containing Pd, followed by the entire volume of the substrate solution. The vial was sealed with a PTFE-lined cap and the reaction was allowed to stir for 6 h at room temperature. The reaction mixture was transferred via Pasteur pipette into an NMR tube. The tube was capped tightly, removed from the glovebox, and immediately analyzed by  $^{19}\text{F}$  NMR.

#### Results:

**Table S23.** Effect of  $\text{SnBu}_4$  on Stoichiometric Selectivity<sup>a</sup>

| 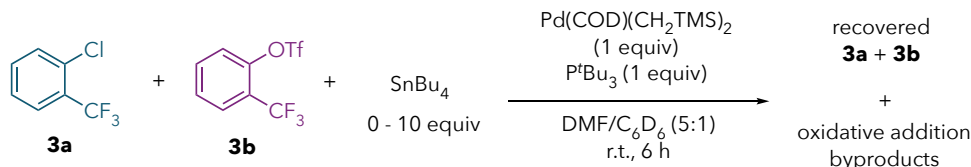 |                            |               |           |                           |
|--------------------------------------------------------------------------------------|----------------------------|---------------|-----------|---------------------------|
| entry                                                                                | additive (equiv)           | recovered (%) |           | reacted<br><b>3a : 3b</b> |
|                                                                                      |                            | <b>3a</b>     | <b>3b</b> |                           |
| 1                                                                                    | (none)                     | 87            | 57        | 1 : 3                     |
| 2                                                                                    | $\text{SnBu}_4$ (1 equiv)  | 86            | 26        | 1 : 5                     |
| 3                                                                                    | $\text{SnBu}_4$ (2 equiv)  | 73            | 16        | 1 : 3                     |
| 4                                                                                    | $\text{SnBu}_4$ (10 equiv) | 76            | 23        | 1 : 3                     |

**Discussion:**  $\text{SnBu}_4$  did not have a significant effect on the selectivity of oxidative addition, even when used in large excess. C—OTf oxidative addition continues to occur preferentially.

See pages S136-S138 for the  $^{19}\text{F}$  NMR spectra corresponding to these experiments.

#### 4. Alternative Hypothesis: Effect of *n*-Bu<sub>3</sub>SnOTf

**Hypothesis:** We speculated that the byproduct of transmetalation with organotin reagents might influence the selectivity of oxidative addition in subsequent catalyst turnovers. In a coordinating solvent like DMF, which favors oxidative addition at triflate, the formal byproduct of transmetalation with PhSnR<sub>3</sub> would be R<sub>3</sub>SnOTf (R = *n*Bu or Me). In this compound, tin has Lewis acidic character, and we envisioned that the Lewis acidic tin might activate an Ar—Cl bond toward oxidative addition through interaction with lone pairs on Cl. We evaluated this hypothesis through stoichiometric oxidative addition studies in DMF in the presence of added Bu<sub>3</sub>SnOTf.

**Procedure:** Inside a nitrogen-filled glovebox, P<sup>t</sup>Bu<sub>3</sub> (5.5 mg, 0.027 mmol, 1 equiv) and Pd(COD)(CH<sub>2</sub>TMS)<sub>2</sub> (10.5 mg, 0.027 mmol, 1 equiv) were combined in a 1-dram vial equipped with a stir bar. In a separate vial, a solution was prepared of **3a** (3.6 μL, 0.027 mmol, 1 equiv), **3b** (5.0 μL, 0.027 mmol, 1 equiv), C<sub>6</sub>H<sub>5</sub>F (7.6 μL, 0.081 mmol, 3 equiv), and *n*-Bu<sub>3</sub>SnOTf (0.027–0.054 mmol, 1-2 equiv) in C<sub>6</sub>D<sub>6</sub> (100 μL). DMF (500 μL) was added to the vial containing Pd, followed by the entire volume of the substrate solution. The vial was sealed with a PTFE-lined cap and the reaction was allowed to stir for 2-6 h at room temperature. The reaction mixture was transferred via Pasteur pipette into an NMR tube. The tube was capped tightly, removed from the glovebox, and immediately analyzed by <sup>19</sup>F NMR.

#### Results:

**Table S24.** Effect of *n*-Bu<sub>3</sub>SnOTf on Stoichiometric Selectivity<sup>a</sup>

| 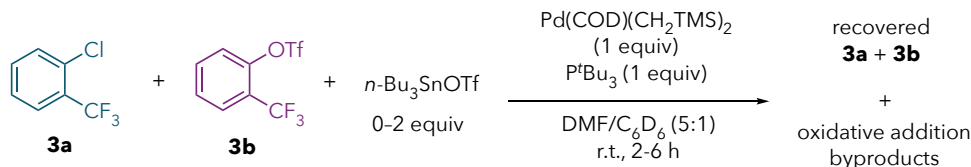 |                               |                            |                            |                           |
|--------------------------------------------------------------------------------------|-------------------------------|----------------------------|----------------------------|---------------------------|
| entry                                                                                | Bu <sub>3</sub> SnOTf (equiv) | recovered (%)<br><b>3a</b> | recovered (%)<br><b>3b</b> | reacted<br><b>3a : 3b</b> |
| 1                                                                                    | 0                             | 87                         | 57                         | 1 : 3                     |
| 2                                                                                    | 1                             | 88                         | 64                         | 1 : 3                     |
| 3                                                                                    | 2                             | 86                         | 65                         | 1 : 3                     |

<sup>a</sup> <sup>19</sup>F NMR yields calibrated against C<sub>6</sub>H<sub>5</sub>F as an internal standard.

**Discussion:** The addition of *n*-Bu<sub>3</sub>SnOTf does not influence the observed selectivity. Thus the previously reported difference between Stille and Suzuki selectivity in DMF should not be attributed to the formation of the byproduct *n*-Bu<sub>3</sub>SnOTf.

See pages S139-S140 for the <sup>19</sup>F NMR spectra corresponding to these experiments.

### 5. Alternative Hypothesis: Autocatalysis in Stoichiometric Oxidative Addition?

**Hypothesis:** Hartwig has previously observed autocatalytic oxidative addition of PhBr to  $\text{Pd}(\text{P}^t\text{Bu}_3)_2$  through the proposed mechanism illustrated below in Figure S10.<sup>27</sup> In this mechanism, a side product of the initial reaction is  $(\text{P}^t\text{Bu}_3)_2\text{Pd}(\text{H})(\text{Br})$  (the proton is derived from C–H activation of a phosphine ligand). This complex undergoes reductive elimination to form  $[\text{H}^-\text{P}^t\text{Bu}_3][\text{Pd}(\text{P}^t\text{Bu}_3)(\text{Br})]$ , which contains anionic Pd(o). The anionic Pd(o) is believed to undergo much more rapid oxidative addition into PhBr than the original neutral  $\text{Pd}(\text{P}^t\text{Bu}_3)_n$  species.

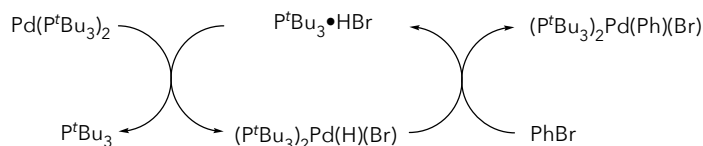

**Figure S10.** Previously reported autocatalytic oxidative addition of PhBr mediated by phosphonium salt.<sup>27</sup>

We considered the possibility that, in our stoichiometric oxidative addition reactions between  $[\text{Pd}(\text{P}^t\text{Bu}_3)]$  and **3a/3b**, an analogous process could occur that would generate highly reactive  $[\text{Pd}(\text{P}^t\text{Bu}_3)(\text{Cl})]^-$ . This anionic bisligated Pd(o) species would be expected to preferentially react at C–OTf, as proposed by Proutiere and Schoenebeck.<sup>21</sup> Because the envisioned autocatalytic cycle would be mediated by  $\text{P}^t\text{Bu}_3\cdot\text{HCl}$ , by analogy to Figure S4, we evaluated this hypothesis by using  $\text{P}^t\text{Bu}_3\cdot\text{HCl}$  as an additive in our stoichiometric studies. If this species promotes a catalytic cycle involving anionic bisligated  $[\text{Pd}(\text{P}^t\text{Bu}_3)(\text{Cl})]^-$ , we would expect to see a change in selectivity toward increased reaction at triflate.

**Procedure:** Inside a nitrogen-filled glovebox,  $\text{P}^t\text{Bu}_3$  (5.5 mg, 0.027 mmol, 1 equiv),  $\text{Pd}(\text{COD})(\text{CH}_2\text{TMS})_2$  (10.5 mg, 0.027 mmol, 1 equiv), and  $\text{P}^t\text{Bu}_3\cdot\text{HCl}$  (0.7 mg, 0.0027 mmol, 0.1 equiv) were combined in a 1-dram vial equipped with a stir bar. In a separate vial, a solution was prepared of **3a** (3.6  $\mu\text{L}$ , 0.027 mmol, 1 equiv), **3b** (5.0  $\mu\text{L}$ , 0.027 mmol, 1 equiv), and  $\text{C}_6\text{H}_5\text{F}$  (7.6  $\mu\text{L}$ , 0.081 mmol, 3 equiv) in  $\text{C}_6\text{D}_6$  (100  $\mu\text{L}$ ). 500  $\mu\text{L}$  of the indicated solvent was added to the vial containing Pd, followed by the entire volume of the substrate solution. The vial was sealed with a PTFE-lined cap and the reaction was allowed to stir for 6 h at room temperature. The reaction mixture was transferred via Pasteur pipette into an NMR tube. The tube was capped tightly, removed from the glovebox, and immediately analyzed by  $^{19}\text{F}$  NMR.

**Table S25.** Effect of Phosphonium Chloride on Stoichiometric Selectivity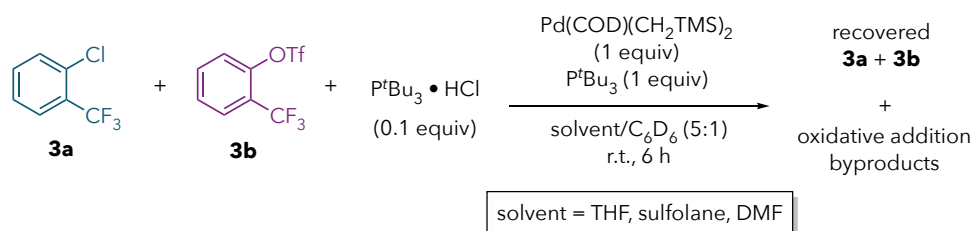

| entry | solvent   | $\text{P}^t\text{Bu}_3\cdot\text{HCl}$<br>(equiv) | trial   | recovered (%) <sup>a</sup> |           | reacted<br><b>3a : 3b</b> |
|-------|-----------|---------------------------------------------------|---------|----------------------------|-----------|---------------------------|
|       |           |                                                   |         | <b>3a</b>                  | <b>3b</b> |                           |
| 1     | THF       | 0                                                 | 1       | 61                         | ≥99       | ≥39 : 1                   |
| 2     | THF       | 0                                                 | 2       | 52                         | ≥99       | ≥48 : 1                   |
| 3     | THF       | 0                                                 | 3       | 51                         | 92        | 6 : 1                     |
| 4     | THF       | 0                                                 | Average | 55                         | 97        | 15 : 1                    |
| 5     | THF       | 0.1                                               | 1       | 60                         | 94        | 7 : 1                     |
| 6     | THF       | 0.1                                               | 2       | 62                         | 96        | 10 : 1                    |
| 7     | THF       | 0.1                                               | Average | 61                         | 95        | 8 : 1                     |
| 8     | sulfolane | 0                                                 | 1       | 82                         | 93        | 3 : 1                     |
| 9     | sulfolane | 0                                                 | 2       | 90                         | 98        | 5 : 1                     |
| 10    | sulfolane | 0                                                 | Average | 86                         | 95        | 3 : 1                     |
| 11    | sulfolane | 0.1                                               | 1       | 91                         | 96        | 2 : 1                     |
| 12    | sulfolane | 0.1                                               | 2       | 90                         | 94        | 2 : 1                     |
| 13    | sulfolane | 0.1                                               | Average | 90                         | 95        | 2 : 1                     |
| 14    | DMF       | 0                                                 | 1       | 88                         | 57        | 1 : 4                     |
| 15    | DMF       | 0                                                 | 2       | 87                         | 57        | 1 : 3                     |
| 16    | DMF       | 0                                                 | 3       | 76                         | 33        | 1 : 3                     |
| 17    | DMF       | 0                                                 | 4       | 63                         | 29        | 1 : 2                     |
| 18    | DMF       | 0                                                 | Average | 78                         | 44        | 1 : 3                     |
| 19    | DMF       | 0.1                                               | 1       | 76                         | 31        | 1 : 3                     |
| 20    | DMF       | 0.1                                               | 2       | 81                         | 44        | 1 : 3                     |
| 21    | DMF       | 0.1                                               | Average | 79                         | 37        | 1 : 3                     |

<sup>a</sup> <sup>19</sup>F NMR yields calibrated against  $\text{C}_6\text{H}_5\text{F}$  as an internal standard.

**Discussion:** The addition of 10 mol % of  $\text{P}^t\text{Bu}_3\cdot\text{HCl}$  led to some selectivity deterioration in THF and sulfolane. However, addition of this quantity of phosphonium salt was insufficient to result in an inversion of selectivity in these solvents. There was no change to the observed selectivity in DMF. These results suggest that, under the standard stoichiometric conditions in the absence of added  $\text{P}^t\text{Bu}_3\cdot\text{HCl}$ , it is unlikely that bisligated anionic  $[\text{Pd}(\text{P}^t\text{Bu}_3)(\text{Cl})]^-$  is primarily responsible for the preferential triflate selectivity that is observed in coordinating solvents.

Additionally, there are other observations that contradict the hypothesis that triflate selectivity in DMF/MeCN is due to the involvement of  $[\text{Pd}(\text{P}^t\text{Bu}_3)(\text{Cl})]^-$  under the stoichiometric conditions. (1) While it makes sense to consider that this anionic species would be better stabilized in polar solvents, preferential reaction at triflate is *not* observed in polar noncoordinating solvents like sulfolane and propylene carbonate (see Table 3 of the manuscript, entries 8-9). (2) Hartwig observed autocatalysis in the oxidative addition of PhBr in the nonpolar solvents toluene and THF, in addition to the polar non-coordinating solvent 2-butanone. If a similar mechanism occurred in our stoichiometric

studies, we would expect to see preferential reaction at triflate (via  $[\text{Pd}(\text{P}^t\text{Bu}_3)(\text{Cl})]^-$ ) in toluene, THF, and acetone, but instead we see preferential selectivity for reaction of chloride in these solvents (Table 3, entries 1-4). (3) Control studies show that the presence of a **3a** as a chloride source is not necessary to observe reaction of **3b** in MeCN and DMF (Table 3, entries 12-13).

See pages S141-S143 for the  $^{19}\text{F}$  NMR spectra corresponding to these experiments.

## H. Error Analysis

Possible sources of error in GC yields include measurements of reagents and internal standard (typically undecane) and instrument error. To analyze measurement error, substrate **1** and undecane were measured out by volume in the same manner used for reaction set up, and the masses of the measured volumes were weighed by injecting the volume into an empty tared vial. In particular, 7.5  $\mu\text{L}$  of undecane was measured with a 10  $\mu\text{L}$  syringe (marked with 0.2  $\mu\text{L}$  gradations), and 14  $\mu\text{L}$  of **1** was measured with a 25  $\mu\text{L}$  syringe (marked with 0.5  $\mu\text{L}$  gradations). This process was repeated 5x for each compound. The results are summarized in Tables S26 and S27 below. To analyze error in GC analysis, the same reaction sample was analyzed by GC 5x (Table S28).

**Table S26.** Undecane measurement error.

| trial                 | mass        |
|-----------------------|-------------|
| 1                     | 5.8 mg      |
| 2                     | 5.7 mg      |
| 3                     | 5.5 mg      |
| 4                     | 5.6 mg      |
| 5                     | 5.7 mg      |
| Average               | 5.66 mg     |
| Std. dev.             | 0.11 mg     |
| Std. dev. as % of avg | $\pm 1.9\%$ |

**Table S27.** Substrate **1** measurement error.

| trial                 | mass        |
|-----------------------|-------------|
| 1                     | 21.8 mg     |
| 2                     | 21.9 mg     |
| 3                     | 21.6 mg     |
| 4                     | 21.9 mg     |
| 5                     | 21.7 mg     |
| Average               | 21.78 mg    |
| Std. dev.             | 0.13 mg     |
| Std. dev. as % of avg | $\pm 0.6\%$ |

**Table S28.** Instrument error: GC yields based on 5 GC runs of the same sample.

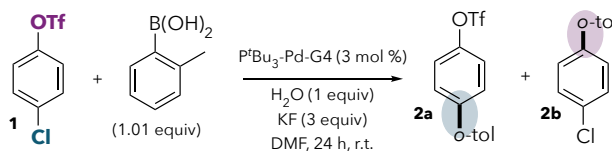

| trial         | <b>1</b> (%) | <b>2a</b> (%) | <b>2b</b> (%) |
|---------------|--------------|---------------|---------------|
| 1             | 21.018       | 9.039         | 60.442        |
| 2             | 21.151       | 9.168         | 60.546        |
| 3             | 21.225       | 9.399         | 60.106        |
| 4             | 20.917       | 9.390         | 60.323        |
| 5             | 21.449       | 9.655         | 60.716        |
| Average (%)   | 21.152       | 9.330         | 60.427        |
| Std. dev. (%) | 0.204        | 0.237         | 0.230         |

Discussion:

The standard deviation of the measured quantity of undecane is  $\pm 1.9\%$  of the average. The standard deviation of the measured quantity of substrate is  $\pm 0.6\%$  of the average. The standard deviation of the yields of **2a** and **2b** determined by GC analysis is  $\pm 0.2\%$  of the average. As such, measurement error of both substrate and (especially) standard are expected to contribute to the most error in calculated yields. Instrument variation is associated with only a small amount of error. Overall, the estimated error in the total mass balance throughout the manuscript is about  $\pm 3\%$  based on the standard deviations of the measurements in this error analysis. Importantly, this error is expected to influence the yields of the two products in the same direction (e.g., under-measuring undecane would increase the yield of both **2a** and **2b**, leading to a relatively minor effect on calculated ratio). Additional variation in yields can be attributed to factors including other measurement errors (e.g., of precatalyst), minor variations in room temperature, heterogeneity of particle size of solid reagents, and variations in the amount of residual O<sub>2</sub> in the reaction vessel.

## II. Computational Details

### A. General Methods

Calculations were performed with Gaussian 16.<sup>28</sup> An ultrafine integration grid and the keyword 5d were used for all calculations. Geometry optimizations of stationary points were carried out in implicit solvent using the CPCM continuum solvation model<sup>29</sup> with the indicated functional (B3LYP or MN15L<sup>30</sup>) and basis sets (either LANL2DZ<sup>31</sup> or SDD for Pd and 6-31+G(d) for all other atoms). Frequency analyses were carried out at the same level to evaluate the zero-point vibrational energy and thermal corrections at 298.15 K. Unless otherwise indicated, Gibbs free energy values are reported after applying Cramer and Truhlar's quasi-harmonic approximation to vibrational entropy<sup>32</sup> and Head-Gordon's quasi-harmonic approximation to vibrational enthalpy<sup>33</sup> to frequencies that are less than 100 cm<sup>-1</sup>. All thermodynamic quantities were computed with the GoodVibes code.<sup>34</sup> The nature of the stationary points was determined in each case according to the appropriate number of negative eigenvalues of the Hessian matrix. Forward and reverse intrinsic reaction coordinate (IRC) calculations were carried out on the optimized transition structures to ensure that the TSs indeed connect the appropriate reactants and products.<sup>35</sup> Multiple conformations were considered for all structures, and the lowest energy conformations are reported. It is worth noting that the lowest-energy  $\pi$ -complexes are not necessarily directly connected to the oxidative addition transition structures on the potential energy surfaces (i.e., in some cases the IRC calculations lead to different higher-energy  $\pi$  complexes than the lowest-energy structures reported). This factor is unimportant to the overall energetics, assuming that the barrier to interconverting  $\pi$ -complexes is low (e.g., by palladium ring-walking or by rotation of the triflate group). 3D images of optimized structures were generated with CYLview.<sup>36</sup> Where indicated, Grimme's D3(BJ) empirical dispersion correction with Becke-Johnson damping was added to the B3LYP energies using the empiricaldispersion=GD3BJ keyword.<sup>37</sup>

## B. Reaction Free Energy Diagram Using DMF Calculated with B3LYP-D3(BJ)

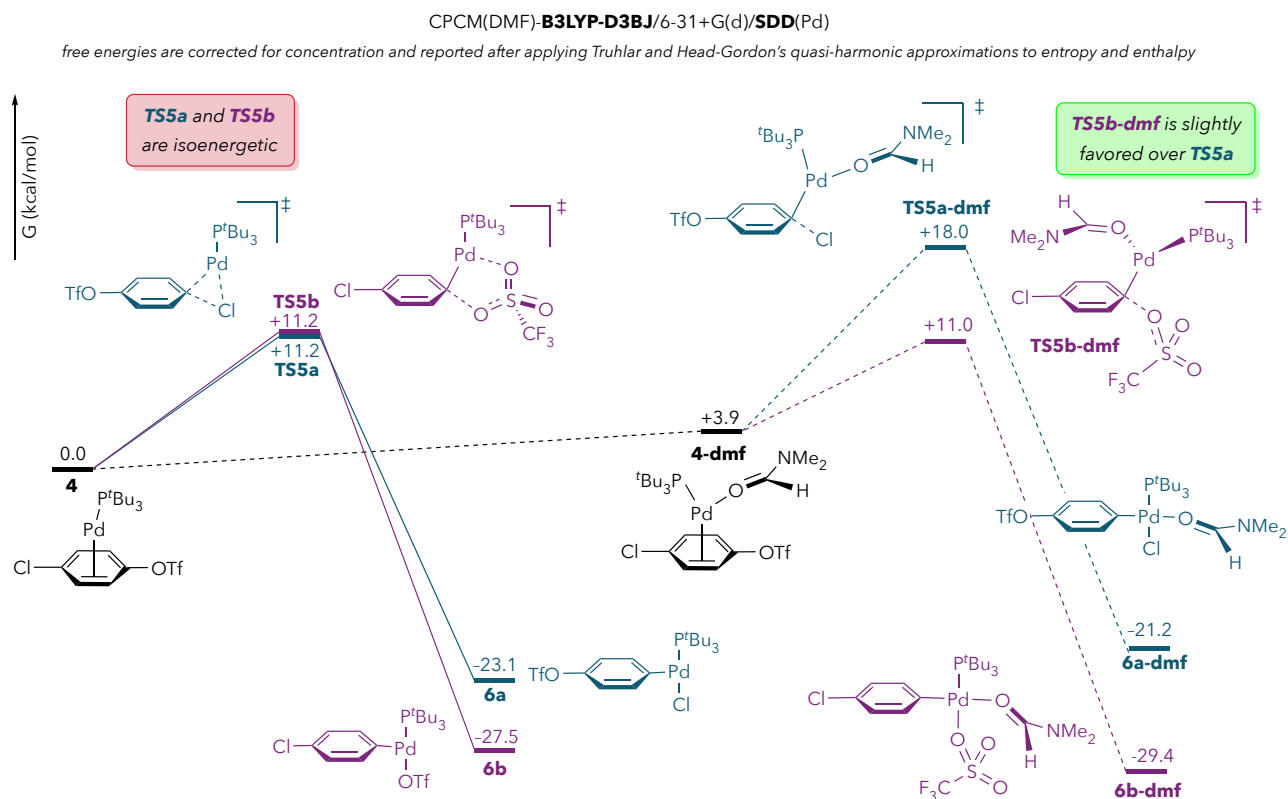

**Figure S11.** Reaction free energy diagrams in DMF calculated with B3LYP-D3(BJ).

**Discussion:** Although the functional B3LYP does not consider London dispersion forces, dispersion corrections can be added. Here we applied Grimme's D3(BJ) empirical dispersion correction with Becke-Johnson damping to the DFT energies using the empiricaldispersion=GD3BJ keyword.<sup>38</sup> The results are similar to those obtained using MN15L in that **TS5b-dmf** becomes much more favorable than it appears without dispersion. However, this level of theory also predicts that **TS5b** and **TS5a** should be isoenergetic, which contradicts the well-established preference for monoligated Pd to react at chloride.<sup>1,39,40,41</sup> As such, MN15L appears to perform better than B3LYP-D3BJ for these calculations. This observation is consistent with prior benchmarking studies with transition metals.<sup>42</sup>

### C. DFT Predictions at 100 °C

Applying thermal corrections at 373.15 K to the calculations performed at the CPCM(DMF)-MN15L/6-31+G(d)/SDD(Pd) level of theory predicts lower selectivity for triflate, (Figure S12). This is expected because **TS5b-dmf** is less entropically favorable than **TS5a**.

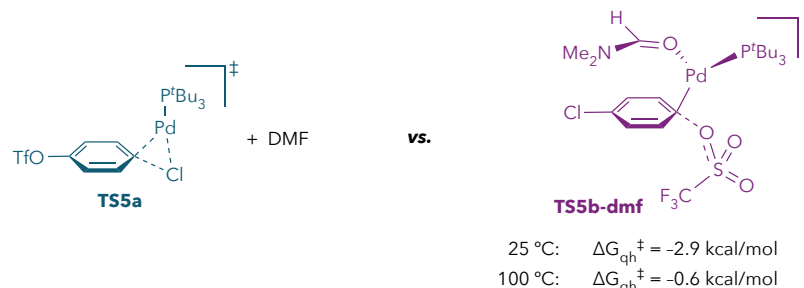

**Figure S12.** DFT predictions at 100 °C using CPCM(DMF)-MN15L/6-31+G(d)/SDD(Pd).

### D. Discussion of DFT Shortcomings

Our DFT calculations, at minimum, suggest that solvent coordination should not be ruled out on the basis of dispersion-free DFT calculations. In particular, they show that the energy of **TS5b-dmf** is similar in energy to **TS5a**. However, even when dispersion is included, the DFT methods used in this work fall short of being able to reproduce the expected coordinating ability trends of different solvents to palladium. For example, the expected order of solvent coordinating ability is MeCN > DMF > THF > benzene, but DFT predicts different trends that vary with method. These results are summarized in Tables S29-S31.

**Table S29.** Differences in energy between **TS5b-dmf** and **TS5a** calculated in implicit DMF<sup>a</sup>

| Method                                       | <b>TS5b-dmf – TS5a</b> |                 |                   |                 |
|----------------------------------------------|------------------------|-----------------|-------------------|-----------------|
|                                              | $\Delta E$             | $\Delta H_{qh}$ | $\Delta G$        | $\Delta G_{qh}$ |
| CPCM(DMF)-B3LYP/6-31+G(d)/LANL2DZ(Pd)        | +6.3                   | +6.3            | +16.2             | +16.4           |
| CPCM(DMF)-B3LYP-D3(BJ)/6-31+G(d)/LANL2DZ(Pd) | -9.3                   | -8.2            | +0.9              | +0.7            |
| CPCM(DMF)-B3LYP-D3(BJ)/6-31+G(d)/SDD(Pd)     | -10.6                  | -10.3           | -0.1              | -0.1            |
| CPCM(DMF)-MN15L/6-31+G(d)/LANL2DZ(Pd)        | -13.0                  | -12.7           | -1.7              | -2.4            |
| CPCM(DMF)-MN15L/6-31+G(d)/SDD(Pd)            | -13.7                  | -12.7           | -2.0 <sup>c</sup> | -2.9            |

<sup>a</sup>Thermal corrections at 298.15 K. All energies reported in kcal/mol. Free energies are corrected for concentration (ratio of DMF: Pd = 765:1). Enthalpy ( $\Delta H_{qh}$ ) is reported after applying Head-Gordon's quasi-harmonic approximation to vibrational enthalpy. The free energy value labeled with  $\Delta G_{qh}$  is reported after applying Cramer and Truhlar's and Head-Gordon's quasi-harmonic approximations to vibrational entropy and enthalpy, while the value labeled as  $\Delta G$  does not include the quasi-harmonic approximations.

**Table S30.** Differences in energy between **TS5b-MeCN** and **TS5a** calculated in implicit MeCN<sup>a</sup>
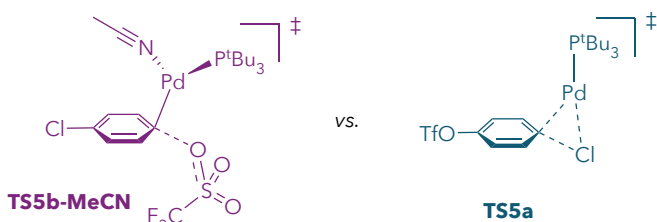

| Method                                 | TS5b-dmf – TS5a |            |            |                               |
|----------------------------------------|-----------------|------------|------------|-------------------------------|
|                                        | $\Delta E$      | $\Delta H$ | $\Delta G$ | $\Delta G_{\text{corrected}}$ |
| CPCM(MeCN)-MN15L/6-31+G(d)/LANL2DZ(Pd) | -7.2            | -7.3       | +0.3       | +0.1                          |
| CPCM(MeCN)-MN15L/6-31+G(d)/SDD(Pd)     | -7.4            | -7.4       | +0.3       | 0.0                           |

<sup>a</sup>Thermal corrections at 298.15 K. All energies reported in kcal/mol. Free energies are corrected for concentration (ratio of DMF:Pd = 1,118:1). Enthalpy ( $\Delta H_{\text{qh}}$ ) is reported after applying Head-Gordon's quasi-harmonic approximation to vibrational enthalpy. The free energy value labeled with  $\Delta G_{\text{qh}}$  is reported after applying Cramer and Truhlar's and Head-Gordon's quasi-harmonic approximations to vibrational entropy and enthalpy, while the value labeled as  $\Delta G$  does not include the quasi-harmonic approximations.

**Table S31.** Differences in energy between **TS5b-thf** and **TS5a** calculated in implicit THF<sup>a</sup>
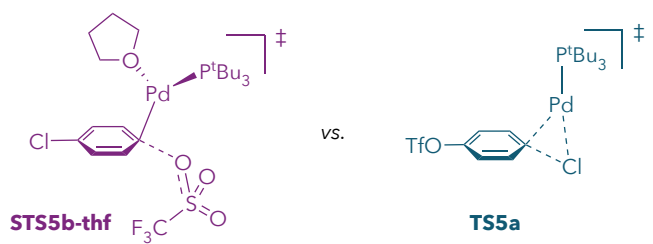

| Method                                       | TS5b-dmf – TS5a |            |            |                               |
|----------------------------------------------|-----------------|------------|------------|-------------------------------|
|                                              | $\Delta E$      | $\Delta H$ | $\Delta G$ | $\Delta G_{\text{corrected}}$ |
| CPCM(THF)-B3LYP-D3(BJ)/6-31+G(d)/LANL2DZ(Pd) | -9.1            | -8.8       | +0.8       | +1.4                          |
| CPCM(MeCN)-MN15L/6-31+G(d)/SDD(Pd)           | -11.2           | -10.9      | 0.0        | -1.0                          |

<sup>a</sup>Thermal corrections at 298.15 K. All energies reported in kcal/mol. Free energies are corrected for concentration (ratio of DMF:Pd = 718:1). Enthalpy ( $\Delta H_{\text{qh}}$ ) is reported after applying Head-Gordon's quasi-harmonic approximation to vibrational enthalpy. The free energy value labeled with  $\Delta G_{\text{qh}}$  is reported after applying Cramer and Truhlar's and Head-Gordon's quasi-harmonic approximations to vibrational entropy and enthalpy, while the value labeled as  $\Delta G$  does not include the quasi-harmonic approximations.

Using CPCM(solvent)-MN15L/6-31+G(d)/LANL2DZ(Pd), we also attempted to evaluate coordinating strength of several different solvents at both Pd(o) and Pd(II) by calculating the energies of the species depicted in Schemes S1 and S2. The free energy values in these schemes are reported after applying a standard state concentration assuming that Pd is 0.017 M in solvent, and with quasi-harmonic approximations to vibrational enthalpy and entropy. However, as shown, DFT at this level of theory suggests that the order of coordinating ability to 12  $e^-$  Pd(o) should be benzene > MeCN > DMF > THF, which does not match the expected order of MeCN > DMF > THF > benzene. When considering coordination to 14  $e^-$  Pd(II), the calculations indicate that solvent coordination is unfavorable in all cases, and the energetics suggest the following order of coordinating ability to Pd(II): benzene > DMF  $\approx$  MeCN > THF. Moreover, in the optimized structures of the solvato complexes with THF and benzene, the solvent molecule is very far away from Pd ( $\geq 3.65$  Å). The failure of DFT to discriminate between coordinating ability of these solvents indicates that this level of theory is not adequate for describing the strength of weak dative bonds. It is possible that

more useful information may be gleaned using different functionals or larger basis sets; alternatively, molecular dynamics simulations may contribute to a more accurate representation of solvent coordination.

**Scheme S1.** Calculating favorability of solvent coordination to 12  $e^-$  Pd(o).

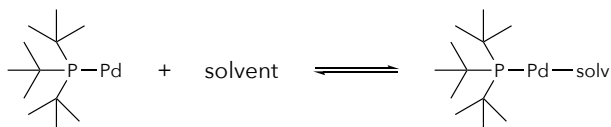

MeCN ( $\sigma$ -type): -9.2 kcal/mol  
 MeCN ( $\pi$ -type): -9.0 kcal/mol  
 DMF: -6.9 kcal/mol  
 THF: -6.2 kcal/mol  
 benzene: -13.1 kcal/mol

**Scheme S2.** Calculating favorability of solvent coordination to 14  $e^-$  Pd(II).

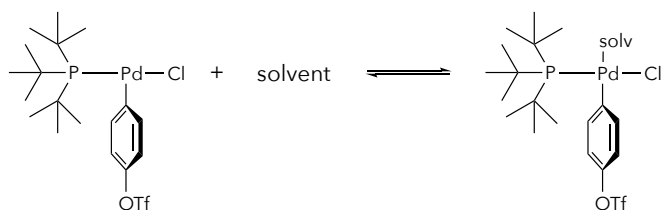

MeCN ( $\sigma$ -type): +3.9 kcal/mol  
 DMF: +4.0 kcal/mol  
 THF: +3.4 kcal/mol  
 benzene: +0.9 kcal/mol

## E. Energies, Entropies, and Lowest Frequencies of Minimum Energy Structures

**Table S32.** Calculations at the CPCM(DMF)-B3LYP/6-31+G(d)/LANL2DZ(Pd) level of theory.<sup>a</sup>

| Structure                     | E <sub>elec</sub><br>(Hartree) | ZPE<br>(Hartree) | H <sub>qh</sub> (Hartree) <sup>c</sup> | G <sup>d</sup><br>(Hartree) | G <sub>qh</sub> <sup>e</sup><br>(Hartree) | Imaginary Freq <sup>f</sup> |
|-------------------------------|--------------------------------|------------------|----------------------------------------|-----------------------------|-------------------------------------------|-----------------------------|
| <b>4</b>                      | -2594.348615                   | 0.479968         | -2593.838126                           | -2593.939812                | -2593.935128                              |                             |
| <b>TS5a</b>                   | -2594.33273                    | 0.478858         | -2593.823409                           | -2593.925542                | -2593.920232                              | -206.2301                   |
| <b>TS5b</b>                   | -2594.325045                   | 0.47793          | -2593.816619                           | -2593.916959                | -2593.913175                              | -259.9956                   |
| <b>6a</b>                     | -2594.380785                   | 0.481617         | -2593.868329                           | -2593.967968                | -2593.965253                              |                             |
| <b>6b</b>                     | -2594.388147                   | 0.481944         | -2593.875515                           | -2593.97488                 | -2593.97189                               |                             |
| <b>(4-dmf)<sup>b</sup></b>    | -2842.870244                   | 0.583401         | -2842.251221                           | -2842.367065                | -2842.362175                              | -14.5954                    |
| <b>(TS5a-dmf)<sup>b</sup></b> | -2842.851507                   | 0.583269         | -2842.232268                           | -2842.350003                | -2842.34438                               | -179.6848                   |
| <b>TS5b-dmf</b>               | -2842.853054                   | 0.582742         | -2842.234138                           | -2842.351143                | -2842.345837                              | -260.8251                   |
| <b>6a-dmf</b>                 | -2842.911073                   | 0.586476         | -2842.28799                            | -2842.404586                | -2842.39992                               |                             |
| <b>6b-dmf</b>                 | -2842.919852                   | 0.586244         | -2842.297336                           | -2842.41364                 | -2842.409048                              |                             |
| <b>DMF</b>                    | -248.530317                    | 0.102799         | -248.420798                            | -248.45138                  | -248.451688                               |                             |

<sup>a</sup>1 Hartree = 627.51 kcal mol<sup>-1</sup>. Thermal corrections at 298.15 K, with concentration = 13 M for DMF and 0.017 M for all other species. <sup>b</sup>Optimized with a constrained Pd—O distance; so these are unlikely to represent a true minimum-energy structure at this level of theory. <sup>c</sup>Enthalpy reported after application of Head-Gordon's quasi-harmonic approximation to vibrational enthalpy. <sup>d</sup>Solvent-corrected free energy given by  $G = E_{\text{elec}} + G_{\text{corr}}$ , where  $G_{\text{corr}}$  is the thermal correction to Gibbs free energy. <sup>e</sup>Solvent-corrected free energy given by  $G_{\text{qh}} = E_{\text{elec}} + G_{\text{corr}}^*$ , where  $G_{\text{corr}}^*$  is the thermal correction to Gibbs free energy obtained after applying Cramer and Truhlar's and Head-Gordon's quasi-harmonic approximations. <sup>f</sup>The single imaginary frequency is reported for the structures that have one (i.e., the transition structures; and **4-dmf** (optimized with constrained Pd-O distance) also has one imaginary frequency).

**Table S33.** Calculations at the CPCM(DMF)-MN15L/6-31+G(d)/SDD(Pd) level of theory. <sup>a</sup>

| Structure       | E <sub>elec</sub><br>(Hartree) | ZPE<br>(Hartree) | H <sub>qh</sub> (Hartree) <sup>b</sup> | G <sup>c</sup><br>(Hartree) | G <sub>qh</sub> <sup>d</sup><br>(Hartree) | Imaginary Freq <sup>e</sup> |
|-----------------|--------------------------------|------------------|----------------------------------------|-----------------------------|-------------------------------------------|-----------------------------|
| <b>4</b>        | -2593.644346                   | 0.481345         | -2593.133222                           | -2593.228452                | -2593.227671                              |                             |
| <b>TS5a</b>     | -2593.625463                   | 0.480954         | -2593.114724                           | -2593.210282                | -2593.2083                                | -171.5502                   |
| <b>TS5b</b>     | -2593.616729                   | 0.478692         | -2593.108203                           | -2593.205818                | -2593.202853                              | -228.3686                   |
| <b>6a</b>       | -2593.675812                   | 0.483879         | -2593.161958                           | -2593.257676                | -2593.255789                              |                             |
| <b>6b</b>       | -2593.685169                   | 0.483386         | -2593.17171                            | -2593.266324                | -2593.265437                              |                             |
| <b>4-dmf</b>    | -2841.934404                   | 0.586643         | -2841.312338                           | -2841.419651                | -2841.419805                              |                             |
| <b>TS5a-dmf</b> | -2841.902557                   | 0.585601         | -2841.281456                           | -2841.391212                | -2841.389741                              | -137.2208                   |
| <b>TS5b-dmf</b> | -2841.914925                   | 0.585201         | -2841.294157                           | -2841.402029                | -2841.401882                              | -246.0247                   |
| <b>6a-dmf</b>   | -2841.959897                   | 0.588859         | -2841.33526                            | -2841.446021                | -2841.443004                              |                             |
| <b>6b-dmf</b>   | -2841.974739                   | 0.588358         | -2841.350582                           | -2841.459279                | -2841.45836                               |                             |
| <b>DMF</b>      | -248.26759                     | 0.10276          | -248.158125                            | -248.188622                 | -248.188946                               |                             |

<sup>a</sup>1 Hartree = 627.51 kcal mol<sup>-1</sup>. Thermal corrections at 298.15 K, with concentration = 13 M for DMF and 0.017 M for all other species. <sup>b</sup>Enthalpy reported after application of Head-Gordon's quasi-harmonic approximation to vibrational enthalpy. <sup>c</sup>Solvent-corrected free energy given by  $G = E_{\text{elec}} + G_{\text{corr}}$ , where  $G_{\text{corr}}$  is the thermal correction to Gibbs free energy. <sup>d</sup>Solvent-corrected free energy given by  $G_{\text{qh}} = E_{\text{elec}} + G_{\text{corr}}^*$ , where  $G_{\text{corr}}^*$  is the thermal correction to Gibbs free energy obtained after applying Cramer and Truhlar's and Head-Gordon's quasi-harmonic approximations. <sup>e</sup>The single imaginary frequency is reported for the structures that have one (i.e., the transition structures).

**Table S34.** Calculations at the CPCM(DMF)-B3LYP-D3BJ/6-31+G(d)/SDD(Pd) level of theory.<sup>a</sup>

| Structure       | E <sub>elec</sub><br>(Hartree) | ZPE<br>(Hartree) | H <sub>qh</sub> (Hartree) <sup>b</sup> | G <sup>c</sup><br>(Hartree) | G <sub>qh</sub> <sup>d</sup><br>(Hartree) | Imaginary Freq <sup>e</sup> |
|-----------------|--------------------------------|------------------|----------------------------------------|-----------------------------|-------------------------------------------|-----------------------------|
| <b>4</b>        | -2595.688612                   | 0.481727         | -2595.176572                           | -2595.276064                | -2595.272339                              |                             |
| <b>TS5a</b>     | -2595.670641                   | 0.481266         | -2595.159196                           | -2595.257293                | -2595.254542                              | -143.4386                   |
| <b>TS5b</b>     | -2595.66856                    | 0.479359         | -2595.158894                           | -2595.258514                | -2595.254518                              | -291.4703                   |
| <b>6a</b>       | -2595.728252                   | 0.48407          | -2595.213709                           | -2595.311295                | -2595.309183                              |                             |
| <b>6b</b>       | -2595.735645                   | 0.484165         | -2595.221073                           | -2595.318547                | -2595.316219                              |                             |
| <b>4-dmf</b>    | -2844.243619                   | 0.586633         | -2843.621117                           | -2843.734454                | -2843.731391                              |                             |
| <b>TS5a-dmf</b> | -2844.220638                   | 0.586291         | -2843.598437                           | -2843.71181                 | -2843.708974                              | -101.0273                   |
| <b>TS5b-dmf</b> | -2844.231449                   | 0.585406         | -2843.610018                           | -2843.722351                | -2843.720012                              | -320.8933                   |
| <b>6a-dmf</b>   | -2844.286863                   | 0.589193         | -2843.661374                           | -2843.775281                | -2843.771396                              |                             |
| <b>6b-dmf</b>   | -2844.298688                   | 0.588445         | -2843.674178                           | -2843.788233                | -2843.784421                              |                             |
| <b>DMF</b>      | -248.543978                    | 0.10288          | -248.434389                            | -248.464973                 | -248.46527                                |                             |

<sup>a</sup>1 Hartree = 627.51 kcal mol<sup>-1</sup>. Thermal corrections at 298.15 K, with concentration = 13 M for DMF and 0.017 M for all other species. <sup>b</sup>Enthalpy reported after application of Head-Gordon's quasi-harmonic approximation to vibrational enthalpy. <sup>c</sup>Solvent-corrected free energy given by  $G = E_{\text{elec}} + G_{\text{corr}}$ , where  $G_{\text{corr}}$  is the thermal correction to Gibbs free energy. <sup>d</sup>Solvent-corrected free energy given by  $G_{\text{qh}} = E_{\text{elec}} + G_{\text{corr}}^*$ , where  $G_{\text{corr}}^*$  is the thermal correction to Gibbs free energy obtained after applying Cramer and Truhlar's and Head-Gordon's quasi-harmonic approximations. <sup>e</sup>The single imaginary frequency is reported for the structures that have one (i.e., the transition structures).

### III. References

1. Reeves, E. K.; Humke, J. N.; Neufeldt, S. R. *J. Org. Chem.* **2019**, *84*, 11789-11812.
2. Gill, D.; Hester, A. J.; Lloyd-Jones, G. C. *Org. Biomol. Chem.* **2004**, *2*, 2547-2548.
3. Andersen, T. L.; Kramer, S.; Overgaard, J.; Skrydstrup, T. *Organometallics* **2017**, *36*, 2058-2066.
4. Barrios-Landeros, F.; Carrow, B. P.; Hartwig, J. F. *J. Am. Chem. Soc.* **2009**, *131*, 8141-8154.
5. Morozova, V.; Mayer, P.; Berionni, G. *Angew. Chem. Int. Ed.* **2015**, *54*, 14508-14512.
6. Gooßen, L.J.; Rodríguez, N.; Linder, C. *J. Am. Chem. Soc.* **2008**, *130*, 15248-15249.
7. Onodera, S.; Kochi, T.; Kakiuchi, F. *J. Org. Chem.* **2019**, *84*, 6508-6515.
8. Reeves, E.K.; Bauman, O.R.; Mitchem, G.B.; Neufeldt, S.R. *Isr. J. Chem.* **2020**, *60*, 406-409.
9. Entz, E. D.; Russell, J. E. A.; Hooker, L. V. *J. Am. Chem. Soc.* **2020**, *142*, 15454-15463.
10. Bartoli, G.; Bosco, M. *Synthesis* **1980**, *8*, 616-617.
11. Viswanathan, G.S.; Wang, M.; Li, C.J. *Angew. Chem. Int. Ed.* **2002**, *41*, 2138-2141.
12. Shekhar, S.; Dunn, T. B.; Kotecki, B. J.; Montavon, D. K.; Cullen, S. C. *J. Org. Chem.* **2011**, *76*, 4552-4563.
13. Zhang, Z.; Wang, Z. *J. Am. Chem. Soc.* **2006**, *71*, 7485-7487.
14. Gooßen, L.J.; Rodríguez, N.; Linder, C. *J. Am. Chem. Soc.* **2008**, *130*, 15248-15249.
15. Gill, D.; Hester, A.J.; Lloyd-Jones, G.C. *Org. & Biomol. Chem.* **2004**, *2*, 2547-2548.
16. Hansch, C.; Leo, A.; Taft, R.W. *Chem. Rev.* **1991**, *91*, 165-195.
17. Roy, A. H.; Hartwig, J. F. *Organometallics* **2004**, *23*, 194-202.
18. Wohlfarth, C. "Permittivity (Dielectric Constant) of Liquids" in CRC Handbook of Chemistry and Physics, Rumble, Jr., J. R.; Lide, D. R.; Bruno, T. J., eds. CRC Press, Boca Raton, FL, 2020.
19. Suzuki, K.; Shin-ya, M.; Ono, Y.; Matsumoto, T.; Nanbu, N.; Takehara, M.; Ue, M.; Sasaki, Y. *Electrochemistry* **2007**, *75*, 611-614.
20. Salmon, C. J.; Danelon, G. O.; Mascaretti, O. A. *J. Org. Chem.* **2000**, *65*, 9220-9222.
21. Proutiere, F.; Schoenebeck, F. *Angew. Chem. Int. Ed.* **2011**, *50*, 8192-9195.
22. Fairlamb, I.J.S.; Kapdi, A.R.; Lee, A.F. *J. Am. Chem. Soc.* **2004**, *6*, 4435-4438.
23. Zalesskiy, S.S.; Ananikov, V.P. *Organometallics* **2012**, *13*, 2302-2309.
24. National Institute of Health PubChem. Potassium fluoride.  
<https://pubchem.ncbi.nlm.nih.gov/compound/522689> (accessed Sep 30, 2020).
25. Wynn, D. A.; Roth, M. M.; Pollard, B. D. *Talanta* **1984**, *31*, 1036-1040.
26. Peruzzi, N.; Lo Nostro, P.; Ninham, B. W.; Baglioni, P. *J. Solution Chem.* **2015**, *44*, 1224-1239.
27. Barrios-Landeros, F.; Carrow, B. P.; Hartwig, J. F. *J. Am. Chem. Soc.* **2008**, *130*, 5842-5843.
28. Gaussian 16, Revision C.01, Frisch, M. J.; Trucks, G. W.; Schlegel, H. B.; Scuseria, G. E.; Robb, M. A.; Cheeseman, J. R.; Scalmani, G.; Barone, V.; Petersson, G. A.; Nakatsuji, H.; Li, X.; Caricato, M.; Marenich, A. V.; Bloino, J.; Janesko, B. G.; Gomperts, R.; Mennucci, B.; Hratchian, H. P.; Ortiz, J. V.; Izmaylov, A. F.; Sonnenberg, J. L.; Williams-Young, D.; Ding, F.; Lipparini, F.; Egidi, F.; Goings, J.; Peng, B.; Petrone, A.; Henderson, T.; Ranasinghe, D.; Zakrzewski, V. G.; Gao, J.; Rega, N.; Zheng, G.; Liang, W.; Hada, M.; Ehara, M.; Toyota, K.; Fukuda, R.; Hasegawa, J.; Ishida, M.; Nakajima, T.; Honda, Y.; Kitao, O.; Nakai, H.; Vreven, T.; Throssell, K.; Montgomery, J. A., Jr.; Peralta, J. E.; Ogliaro, F.; Bearpark, M. J.; Heyd, J. J.; Brothers, E. N.; Kudin, K. N.; Staroverov, V. N.; Keith, T. A.; Kobayashi, R.; Normand, J.; Raghavachari, K.; Rendell, A. P.; Burant, J. C.; Iyengar, S. S.; Tomasi, J.; Cossi, M.; Millam, J. M.; Klene, M.; Adamo, C.; Cammi, R.;

- 
- Ochterski, J. W.; Martin, R. L.; Morokuma, K.; Farkas, O.; Foresman, J. B.; Fox, D. J. Gaussian, Inc., Wallingford CT, 2016
29. Cossi, M.; Rega, N.; Scalmani, G.; Barone, V. *J. Comput. Chem.* **2003**, *24*, 669.
30. Yu, H. S.; He, X.; Truhlar, D. G. *J. Chem. Theory Comput.* **2016**, *12*, 1280.
31. Hay, P. J.; Wadt, W. R. *J. Chem. Phys.* **1985**, *82*, 299.
32. Ribeiro, R.F.; Marenich, A.V.; Cramer, C.J.; Truhlar, D.G. *J. Phys. Chem. B.* **2011**, *115*, 14556.
33. Li, Y.-P.; Gomes, J.; Sharada, S. M.; Bell, A.T.; Head-Gordon, M. *J. Phys. Chem. C* **2015**, *119*, 1840
34. Luchini, G.; Alegre-Requena, J. V.; Funes-Ardoiz, I.; Paton, R. S. GoodVibes: Automated Thermochemistry for Heterogeneous Computational Chemistry Data. *FI1000Research*, **2020**, *9*, 291.
35. (a) Gonzalez, C.; Schlegel, H. B. *J. Chem. Phys.* **1989**, *90*, 2154; (b) Gonzalez, C.; Schlegel, H.B. *J. Phys. Chem.* **1990**, *94*, 5523; (c) Fukui, K. *Acc. Chem. Res.* **1981**, *14*, 363.
36. CYLview, 1.ob; Legault CY, Université de Sherbrooke, 2009 (<http://www.cylview.org>)
37. (a) Grimme, S.; Antony, J.; Ehrlich, S.; Krieg, H. *J. Chem. Phys.* **2010**, *132*, 154104-154119. (b) Grimme, S.; Ehrlich, S.; Goerigk, L. *J. Comput. Chem.* **2011**, *32*, 1456-1465.
38. (a) Grimme, S.; Antony, J.; Ehrlich, S.; Krieg, H. *J. Chem. Phys.* **2010**, *132*, 154104-154119. (b) Grimme, S.; Ehrlich, S.; Goerigk, L. *J. Comput. Chem.* **2011**, *32*, 1456-1465.
39. Schoenebeck, F.; Houk, K. N. *J. Am. Chem. Soc.* **2010**, *132*, 2496.
40. Niemeyer, Z. L.; Milo, A.; Hickey, D. P.; Sigman, M. S. *Nat. Chem.* **2016**, *8*, 610.
41. So, C. M.; Yuen, O. Y.; Ng, S. S.; Chen, Z. *ACS Catal.* **2021**, *11*, 7820/
42. Moltved, K. A.; Kepp, K. P. *J. Chem. Theory Comput.* **2018**, *14*, 3479.

## IV. NMR Spectra

### A. Compound Characterization

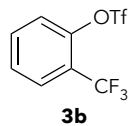

7.68  
7.67  
7.60  
7.59  
7.58  
7.56  
7.56  
7.44  
7.43  
7.42  
7.41  
7.40  
7.16

— 1.43

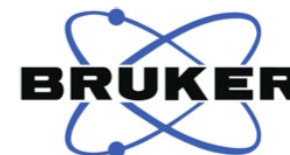

Current Data Parameters  
NAME 5-SMR-74  
EXPNO 20  
PROCNO 1

F2 - Acquisition Parameter  
Date\_ 20211009  
Time 12.37 h  
INSTRUM spect  
PROBHD zg30  
PULPROG zg30  
TD 65536  
SOLVENT CDC13  
NS 64  
DS 2  
SWH 10000.000 Hz  
FIDRES 0.305176 Hz  
AQ 3.2767999 sec  
RG 151.18  
DW 50.000 usec  
DE 16.00 usec  
TE 298.0 K  
D1 2.00000000 sec  
TD0 1  
SF01 500.2330889 MHz  
NUC1 1H  
P0 4.00 usec  
P1 12.00 usec  
PLW1 11.44699955 W

F2 - Processing parameters  
SI 65536  
SF 500.2300620 MHz  
WDW EM  
SSB 0  
LB 0.30 Hz  
GB 0  
PC 1.00

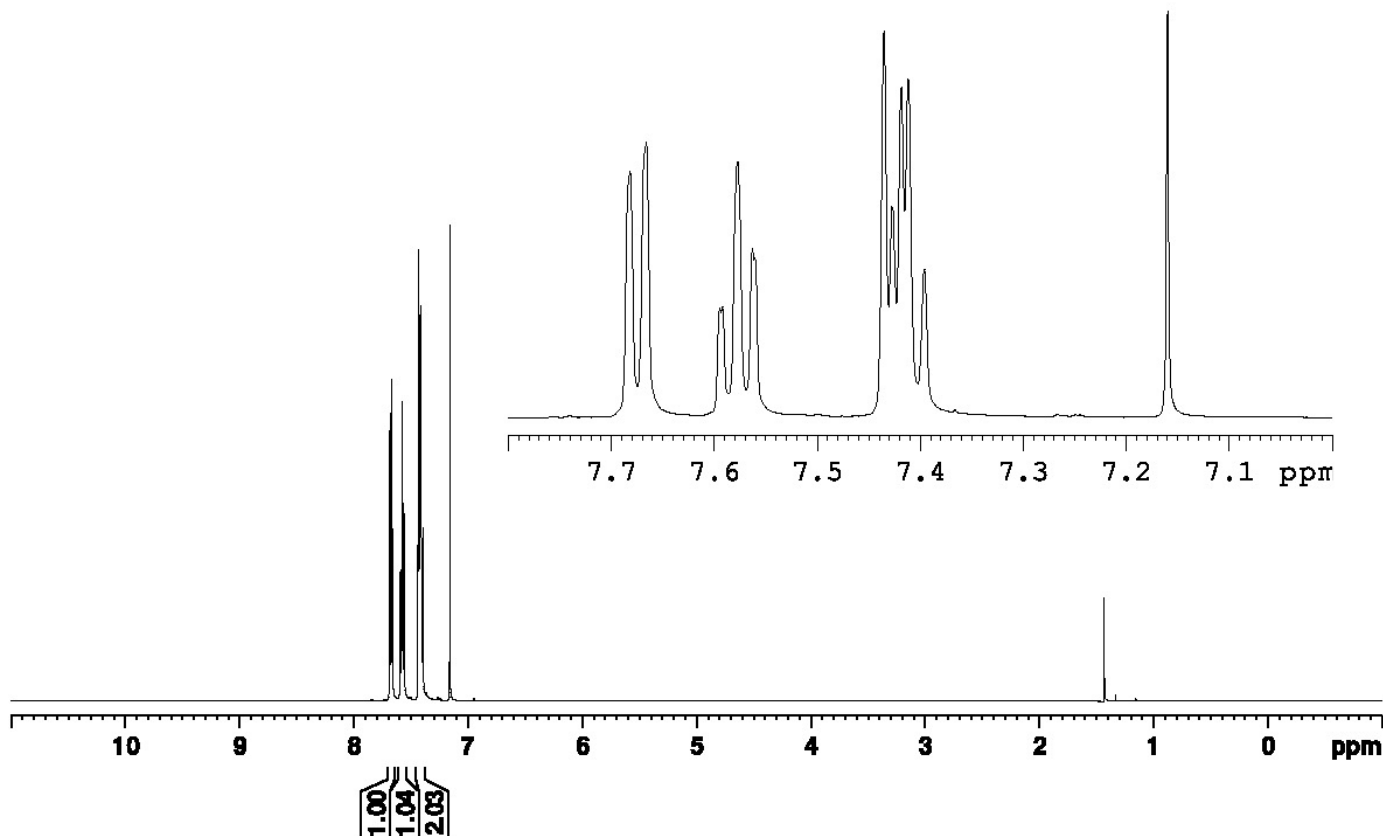

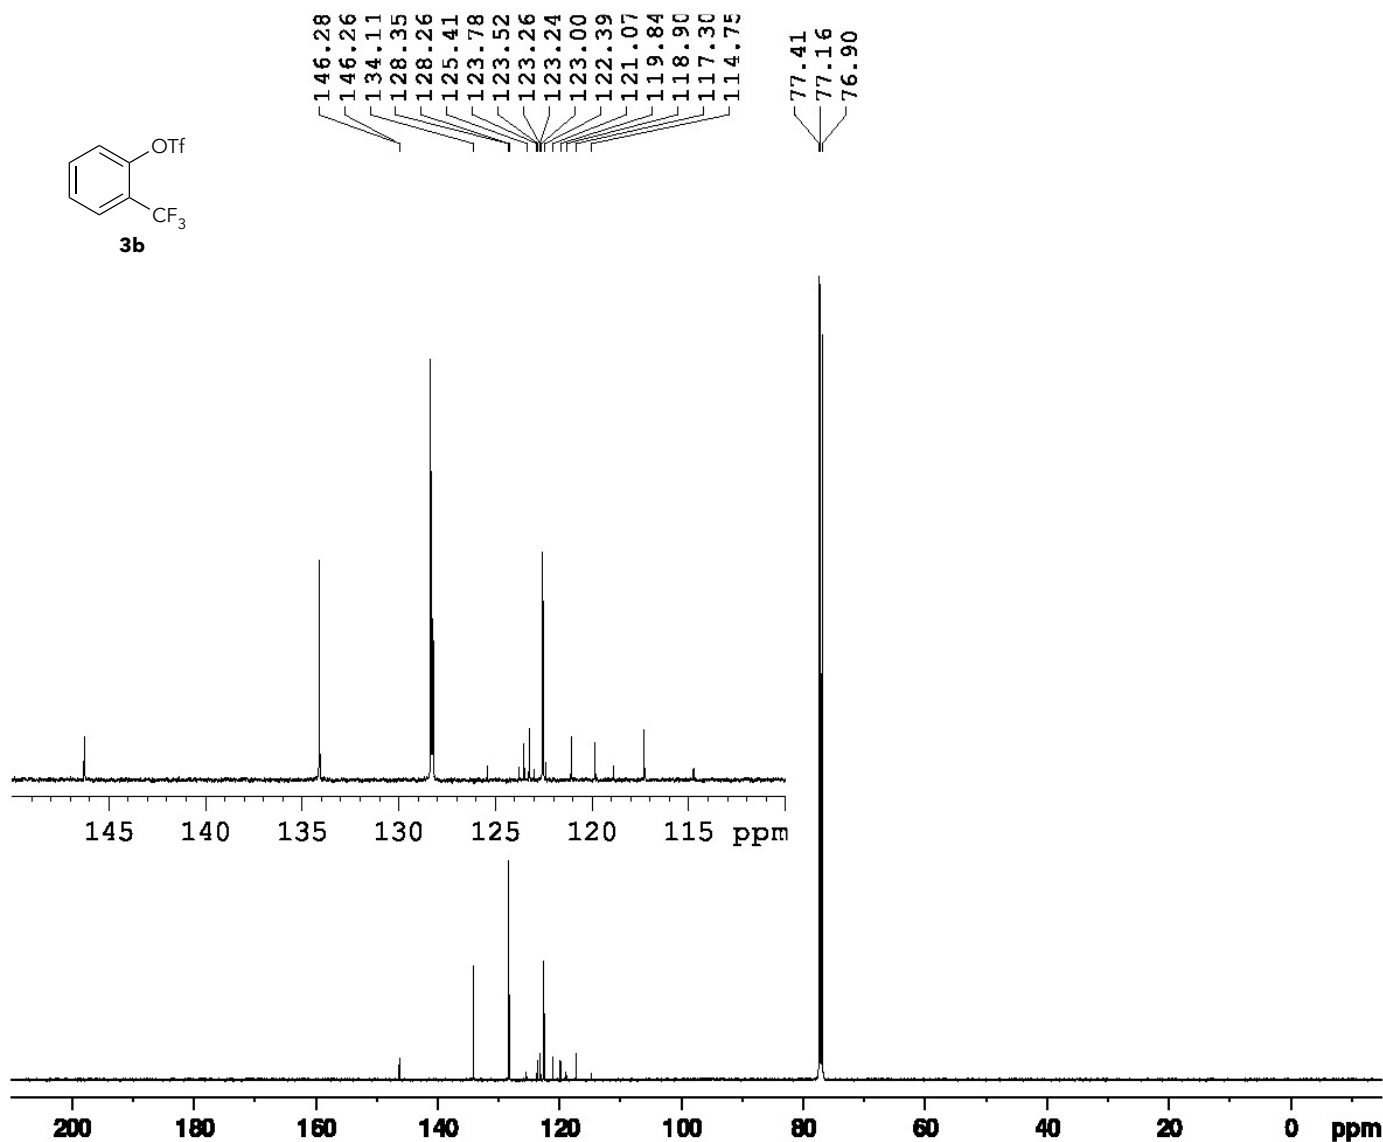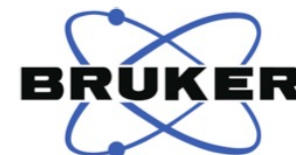

Current Data Parameters  
 NAME 5-SMR-74  
 EXPNO 22  
 PROCNO 1

F2 - Acquisition Parameter  
 Date\_ 20211009  
 Time 13.35 h  
 INSTRUM spect  
 PROBHD Z125869\_0055 (  
 PULPROG zgpg30  
 TD 65536  
 SOLVENT CDCl3  
 NS 1024  
 DS 4  
 SWH 29761.904 Hz  
 FIDRES 0.908261 Hz  
 AQ 1.1010048 sec  
 RG 190.44  
 DW 16.800 usec  
 DE 18.00 usec  
 TE 298.0 K  
 D1 2.00000000 sec  
 D11 0.03000000 sec  
 TD0 1  
 SFO1 125.7955118 MHz  
 NUC1 13C  
 P0 3.33 usec  
 P1 10.00 usec  
 PLW1 56.90299988 W  
 SFO2 500.2320009 MHz  
 NUC2 1H  
 CPDPRG[2] waltz16  
 PCPD2 80.00 usec  
 PLW2 11.44699955 W  
 PLW12 0.25756001 W  
 PLW13 0.12955000 W

F2 - Processing parameters  
 SI 32768  
 SF 125.7829153 MHz  
 WDW EM  
 SSB 0  
 LB 1.00 Hz  
 GB 0  
 PC 1.40

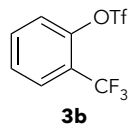

— -60.84  
 < -73.58  
 < -73.58

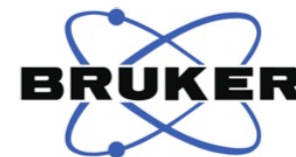

Current Data Parameters  
 NAME 5-SMR-74  
 EXPNO 21  
 PROCNO 2

F2 - Acquisition Parameter  
 Date\_ 20211009  
 Time 12.39 h  
 INSTRUM spect  
 PROBHD Z125869\_0055 (   
 PULPROG zgfglqn  
 TD 130892  
 SOLVENT CDCl3  
 NS 16  
 DS 4  
 SWH 113636.367 Hz  
 FIDRES 1.736338 Hz  
 AQ 0.5759248 sec  
 RG 15.61  
 DW 4.400 usec  
 DE 18.00 usec  
 TE 298.0 K  
 D1 1.00000000 sec  
 TD0 1  
 SFO1 470.6394024 MHz  
 NUC1 19F  
 P1 15.00 usec  
 PLW1 11.70800018 W

F2 - Processing parameters  
 SI 65536  
 SF 470.6864712 MHz  
 WDW EM  
 SSB 0  
 LB 0.30 Hz  
 GB 0  
 PC 1.00

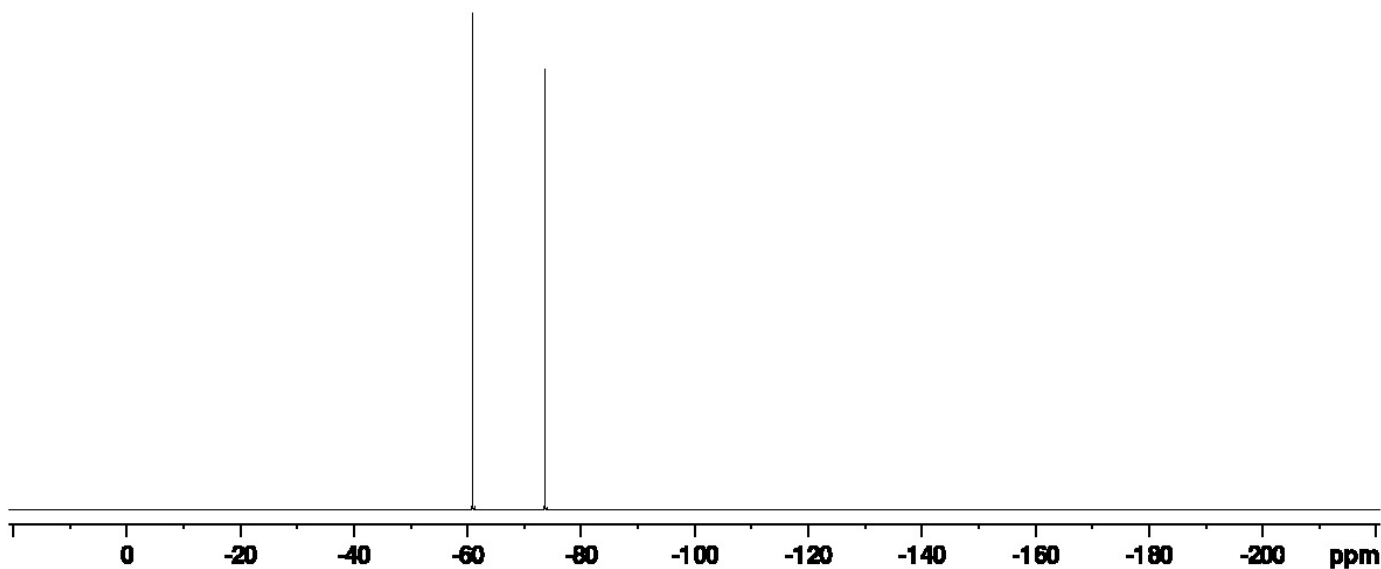

8.14  
7.93  
7.92  
7.68  
7.68  
7.67  
7.66  
7.65  
7.65  
7.56  
7.56  
7.55  
7.55  
7.54  
7.53  
7.53  
7.52  
7.52  
7.51  
7.51  
7.50  
7.49  
7.48  
7.47  
7.46  
7.46  
7.45  
7.43  
7.42

1.53  
1.26  
1.26

0.08

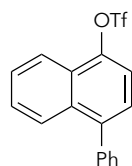

9a

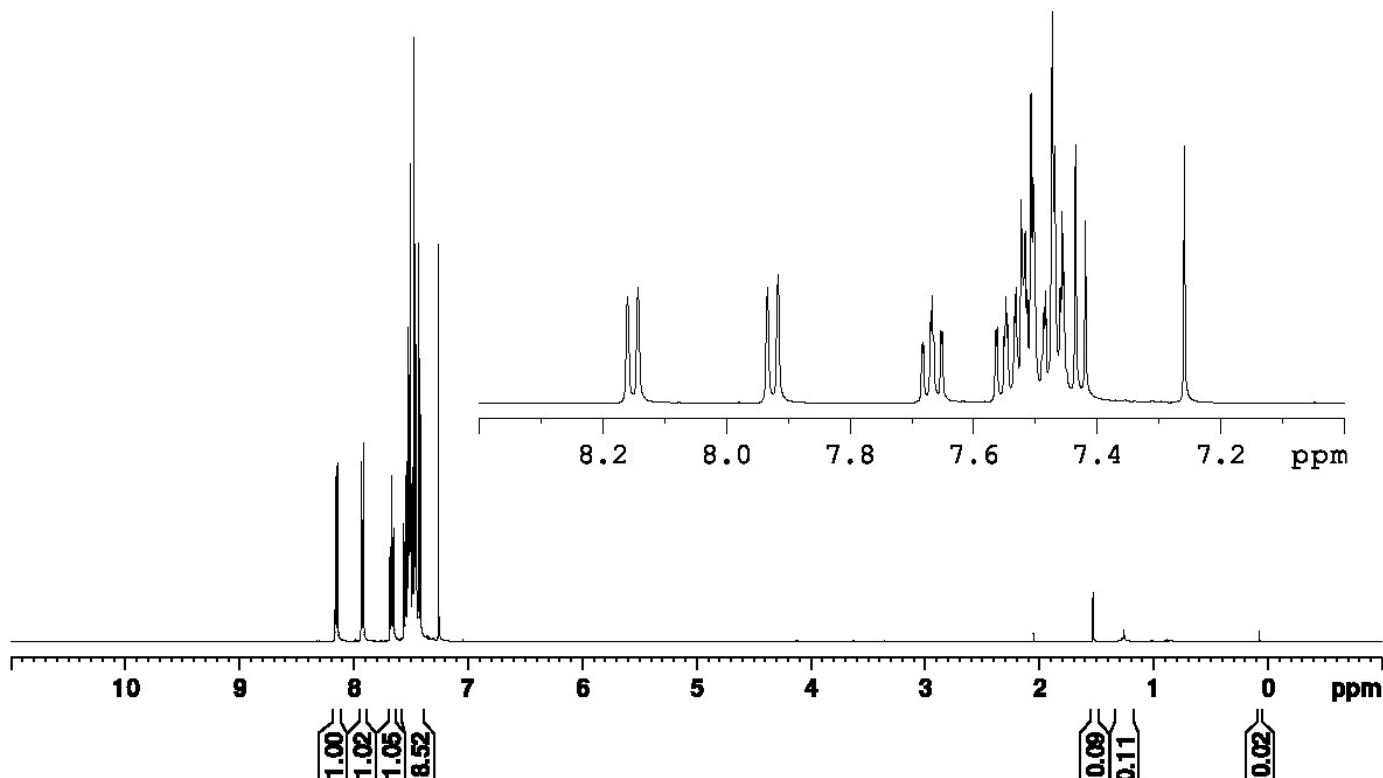

Current Data Parameters  
NAME EKB-1-188  
EXPNO 20  
PROCNO 1

F2 - Acquisition Parameter  
Date\_ 20211006  
Time 15.56 h  
INSTRUM spect  
PROBHD Z125869\_0055 (   
PULPROG zg30  
TD 65536  
SOLVENT CDCl3  
NS 64  
DS 2  
SWH 10000.000 Hz  
FIDRES 0.305176 Hz  
AQ 3.2767999 sec  
RG 151.18  
DW 50.000 usec  
DE 16.00 usec  
TE 298.0 K  
D1 2.00000000 sec  
TD0 1  
SF01 500.2330889 MHz  
NUC1 1H  
P0 4.00 usec  
P1 12.00 usec  
PLW1 11.44699955 W

F2 - Processing parameters  
SI 65536  
SF 500.2300126 MHz  
WDW EM  
SSB 0  
LB 0.30 Hz  
GB 0  
PC 1.00

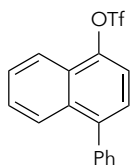

9a

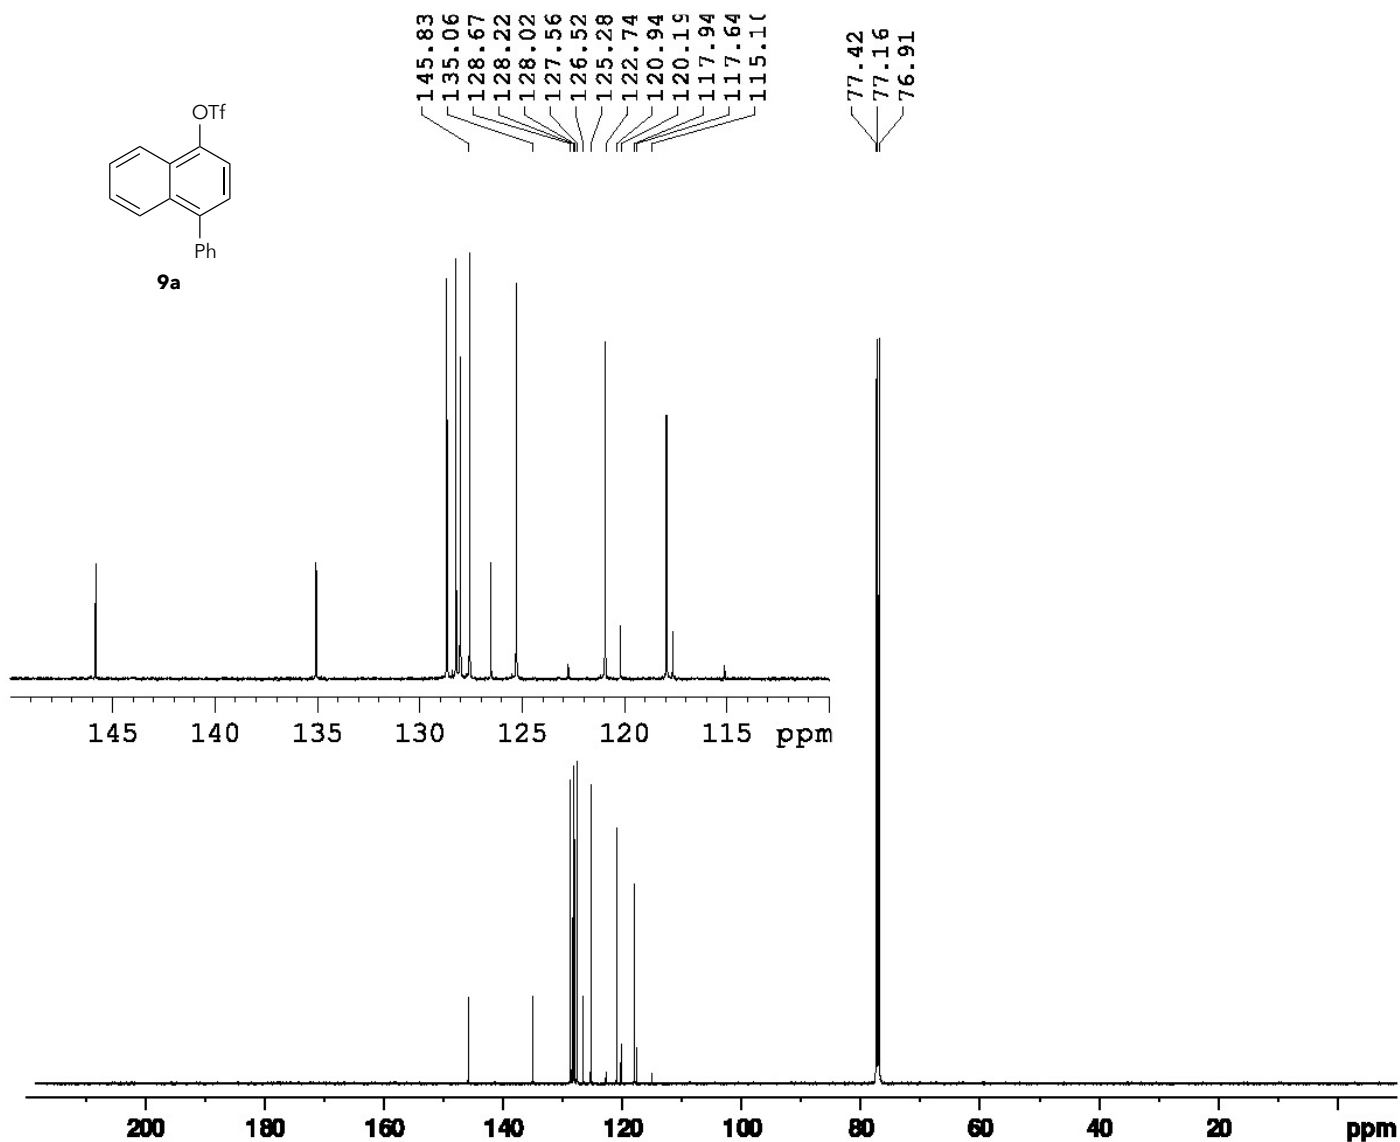

Current Data Parameters  
NAME EKB-1-184  
EXPNO 22  
PROCNO 1

F2 - Acquisition Parameter  
Date\_ 20211007  
Time 12.53 h  
INSTRUM spect  
PROBHD z125869\_0055 (   
PULPROG zgpg30  
TD 65536  
SOLVENT CDCl3  
NS 1024  
DS 4  
SWH 29761.904 Hz  
FIDRES 0.908261 Hz  
AQ 1.1010048 sec  
RG 190.44  
DW 16.800 usec  
DE 18.00 usec  
TE 298.0 K  
D1 2.00000000 sec  
D11 0.03000000 sec  
TD0 1  
SFO1 125.7955118 MHz  
NUC1 13C  
P0 3.33 usec  
P1 10.00 usec  
PLW1 56.90299988 W  
SFO2 500.2320009 MHz  
NUC2 1H  
CPDPRG[2] waltz16  
PCPD2 80.00 usec  
PLW2 11.44699955 W  
PLW12 0.25756001 W  
PLW13 0.12955000 W

F2 - Processing parameters  
SI 32768  
SF 125.7829156 MHz  
WDW EM  
SSB 0  
LB 1.00 Hz  
GB 0  
PC 1.40



**9a**

— -73.30



Current Data Parameters  
 NAME EKB-1-188  
 EXPNO 21  
 PROCNO 2

F2 - Acquisition Parameter  
 Date\_ 20211006  
 Time 15.59 h  
 INSTRUM spect  
 PROBHD Z125869\_0055 (   
 PULPROG zgfglqn  
 TD 130892  
 SOLVENT CDCl3  
 NS 16  
 DS 4  
 SWH 113636.367 Hz  
 FIDRES 1.736338 Hz  
 AQ 0.5759248 sec  
 RG 15.61  
 DW 4.400 usec  
 DE 18.00 usec  
 TE 298.0 K  
 D1 1.00000000 sec  
 TD0 1  
 SFO1 470.6394024 MHz  
 NUC1 19F  
 P1 15.00 usec  
 PLW1 11.70800018 W

F2 - Processing parameters  
 SI 65536  
 SF 470.6864712 MHz  
 WDW EM  
 SSB 0  
 LB 0.30 Hz  
 GB 0  
 PC 1.00

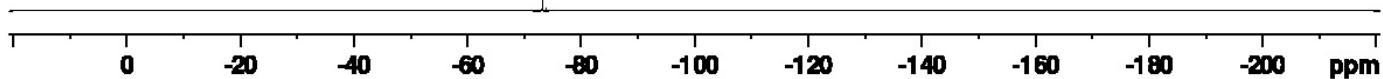

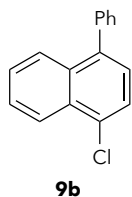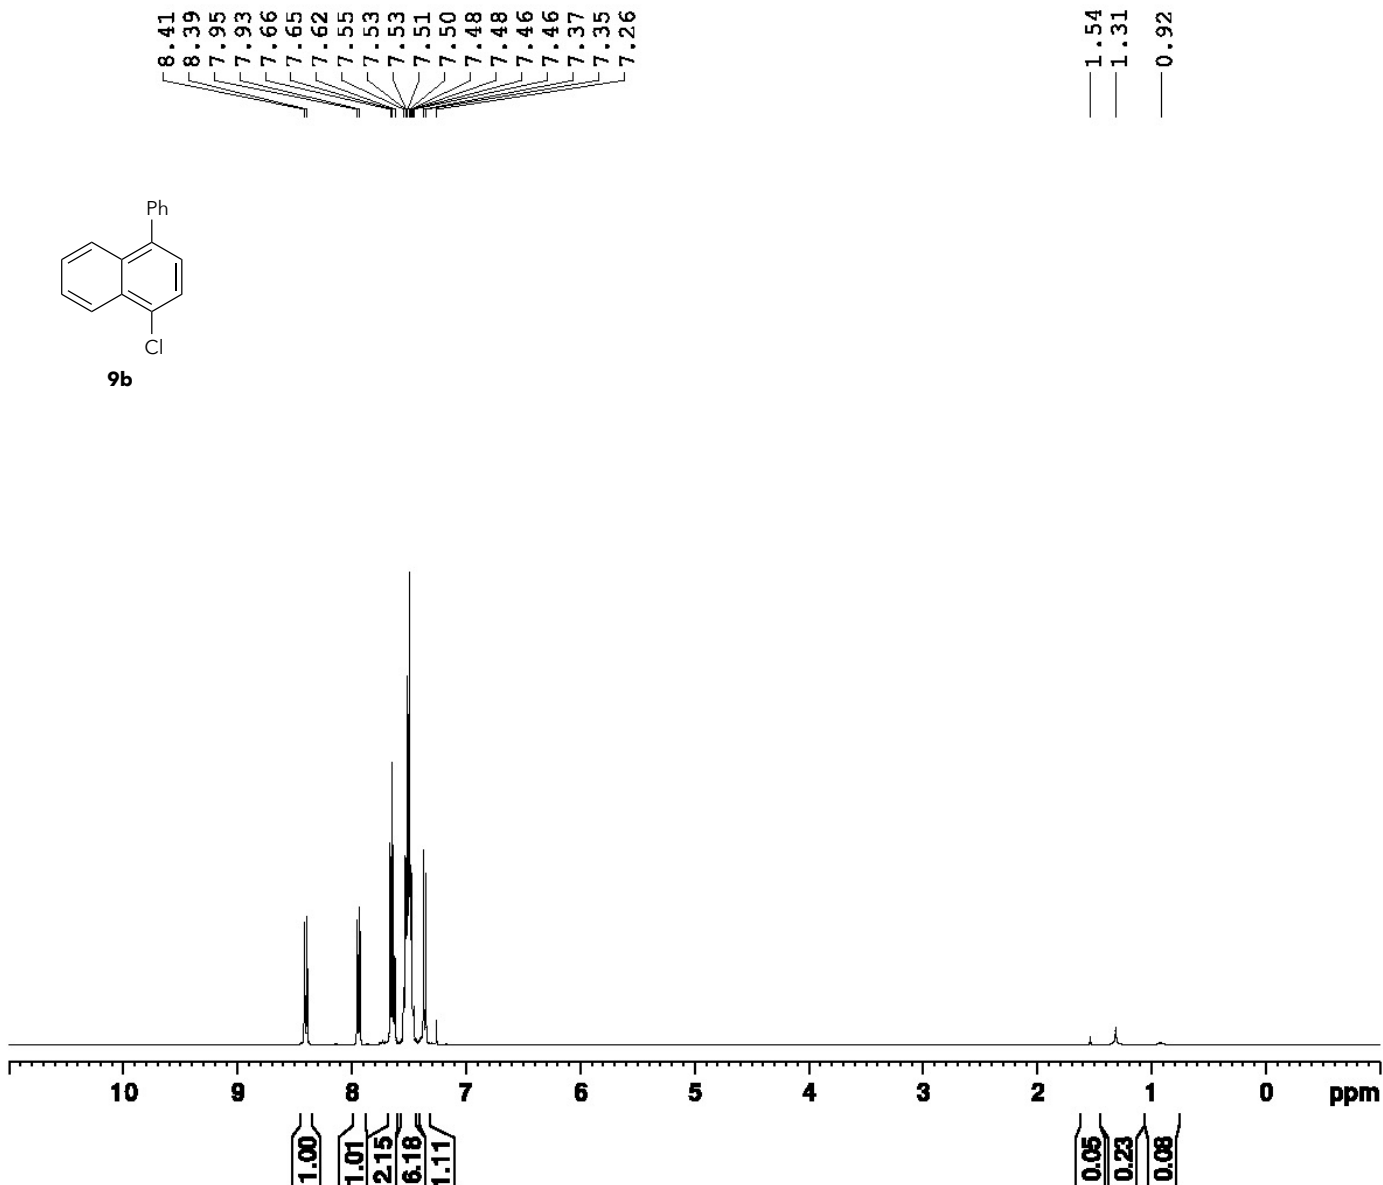

— 1.54  
— 1.31  
— 0.92

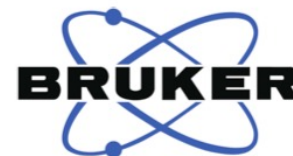

Current Data Parameters  
NAME 5-SMR-147-final  
EXPNO 10  
PROCNO 1

F2 - Acquisition Parameter  
Date\_ 20210902  
Time 16.06 h  
INSTRUM Avance Neo  
PROBHD Z152088\_0031 (  
PULPROG zg30  
TD 65536  
SOLVENT CDCl3  
NS 16  
DS 2  
SWH 8196.722 Hz  
FIDRES 0.250144 Hz  
AQ 3.9976959 sec  
RG 79.9054  
DW 61.000 usec  
DE 13.89 usec  
TE 298.2 K  
D1 1.00000000 sec  
TD0 1  
SFO1 400.1324708 MHz  
NUC1 1H  
P0 2.67 usec  
P1 8.00 usec  
PLW1 24.03499985 W

F2 - Processing parameters  
SI 65536  
SF 400.1300097 MHz  
WDW EM  
SSB 0  
LB 0.30 Hz  
GB 0  
PC 1.00

8.10  
8.10  
8.09  
8.08  
8.05  
8.04  
8.03  
8.03  
7.68  
7.67  
7.66  
7.66  
7.65  
7.64  
7.64  
7.64  
7.63  
7.62  
7.37  
7.35  
7.33  
7.33  
7.31  
7.31  
7.26

2.71  
2.71

1.54  
1.26  
0.88

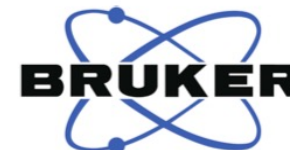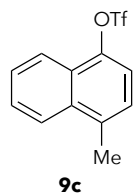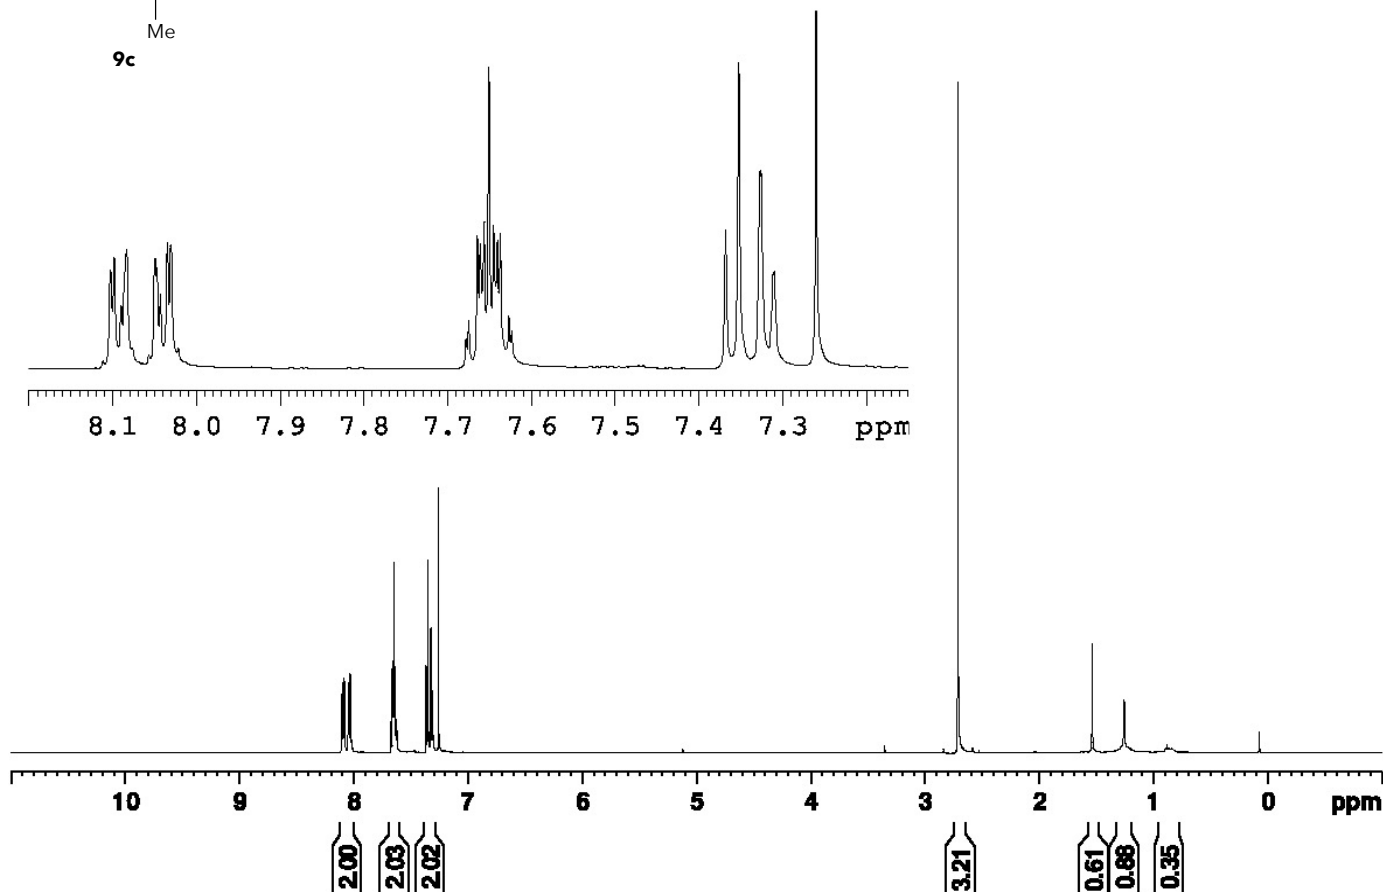

Current Data Parameters  
NAME 5-SMR-181  
EXPNO 20  
PROCNO 1

F2 - Acquisition Parameter  
Date\_ 20211007  
Time 18.30 h  
INSTRUM spect  
PROBHD Z125869\_0055 (   
PULPROG zg30  
TD 65536  
SOLVENT CDCl3  
NS 64  
DS 2  
SWH 10000.000 Hz  
FIDRES 0.305176 Hz  
AQ 3.2767999 sec  
RG 151.18  
DW 50.000 usec  
DE 16.00 usec  
TE 298.0 K  
D1 2.00000000 sec  
TD0 1  
SFO1 500.2330889 MHz  
NUC1 1H  
P0 4.00 usec  
P1 12.00 usec  
PLW1 11.44699955 W

F2 - Processing parameters  
SI 65536  
SF 500.2300124 MHz  
WDW EM  
SSB 0  
LB 0.30 Hz  
GB 0  
PC 1.00

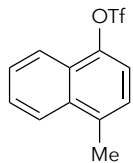

9c

144.44  
135.60  
133.90  
127.58  
127.34  
126.47  
125.71  
124.77  
122.73  
121.44  
120.18  
117.64  
117.48  
115.09

77.41  
77.16  
76.90

19.44

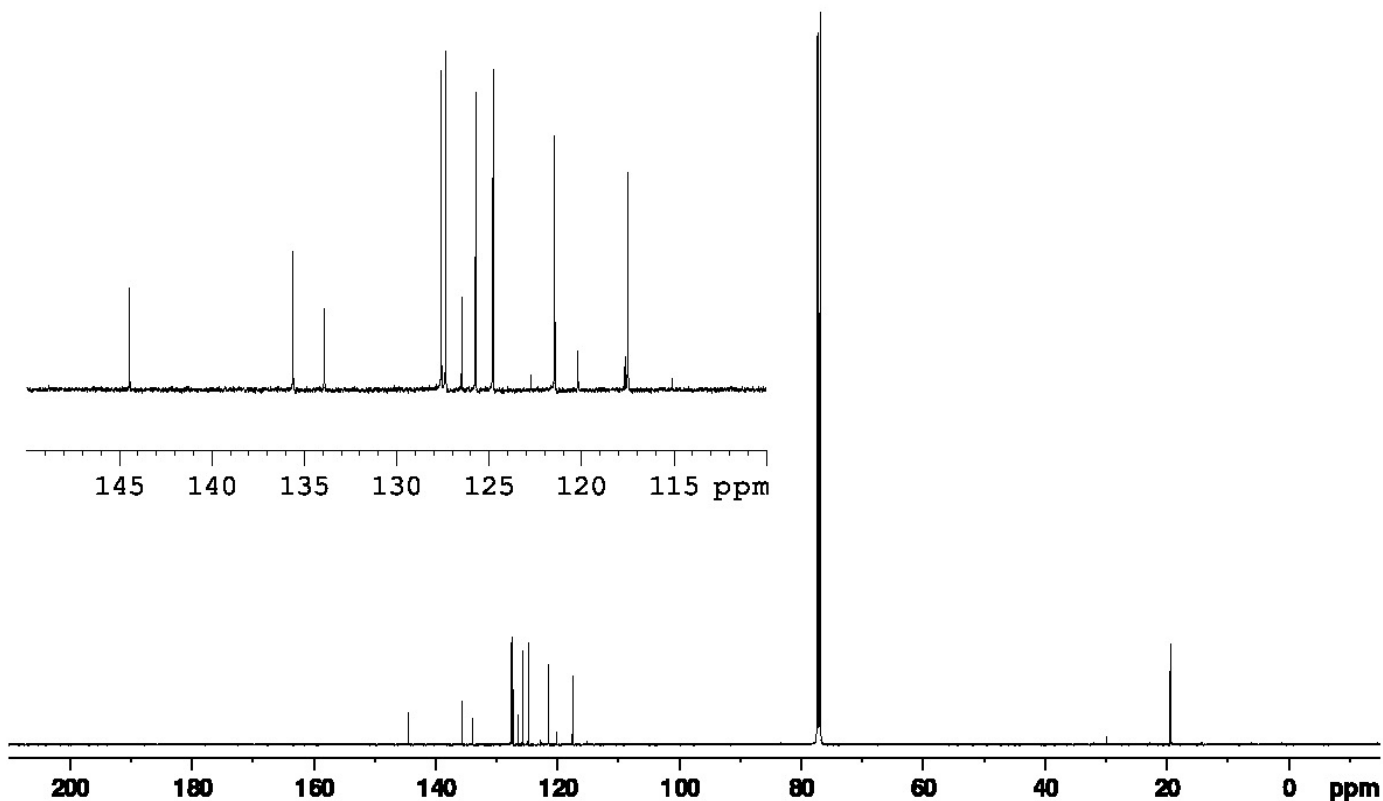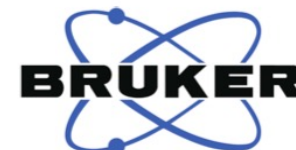

Current Data Parameters  
NAME 5-SMR-181  
EXPNO 21  
PROCNO 1

F2 - Acquisition Parameter  
Date\_ 20211007  
Time 20.21 h  
INSTRUM spect  
PROBHD Z125869\_0055 (  
PULPROG zgpg30  
TD 65536  
SOLVENT CDCl3  
NS 2048  
DS 4  
SWH 29761.904 Hz  
FIDRES 0.908261 Hz  
AQ 1.1010048 sec  
RG 190.44  
DW 16.800 usec  
DE 18.00 usec  
TE 298.0 K  
D1 2.00000000 sec  
D11 0.03000000 sec  
TD0 1  
SFO1 125.7955118 MHz  
NUC1 13C  
P0 3.33 usec  
P1 10.00 usec  
PLW1 56.90299988 W  
SFO2 500.2320009 MHz  
NUC2 1H  
CPDPRG[2] waltz16  
PCPD2 80.00 usec  
PLW2 11.44699955 W  
PLW12 0.25756001 W  
PLW13 0.12955000 W

F2 - Processing parameters  
SI 32768  
SF 125.7829158 MHz  
WDW EM  
SSB 0  
LB 1.00 Hz  
GB 0  
PC 1.40

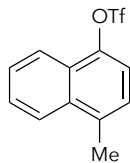

**9c**

— -73.37

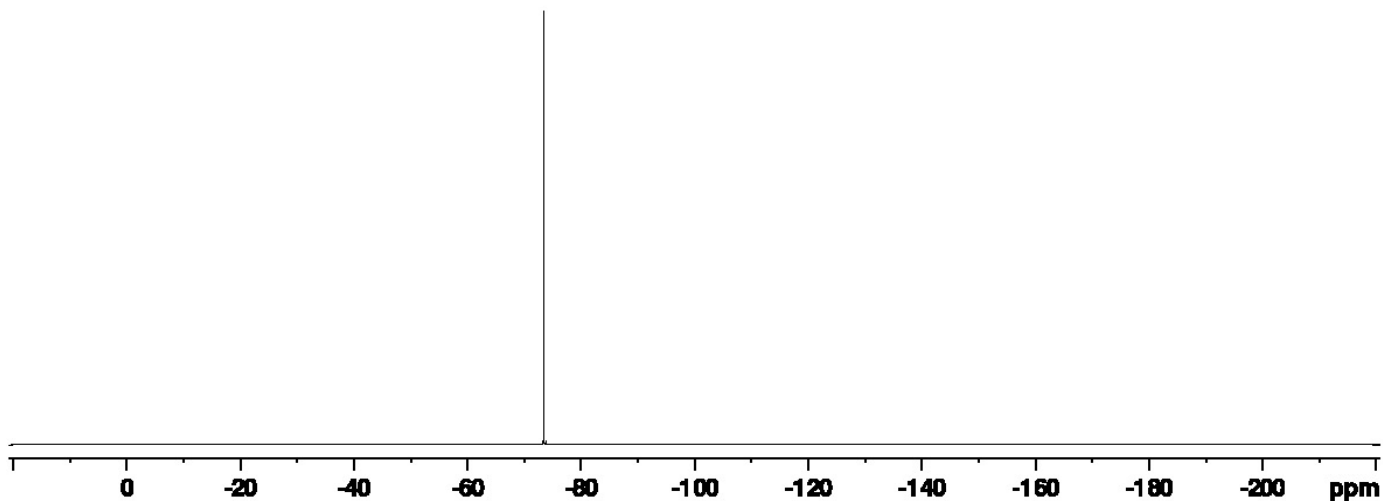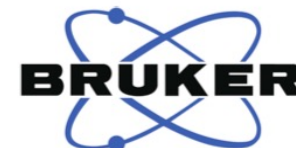

Current Data Parameters  
 NAME 5-SMR-181  
 EXPNO 22  
 PROCNO 2

F2 - Acquisition Parameter  
 Date\_ 20211007  
 Time 20.23 h  
 INSTRUM spect  
 PROBHD Z125869\_0055 (  
 PULPROG zgflqn  
 TD 130892  
 SOLVENT CDCl3  
 NS 16  
 DS 4  
 SWH 113636.367 Hz  
 FIDRES 1.736338 Hz  
 AQ 0.5759248 sec  
 RG 15.61  
 DW 4.400 usec  
 DE 18.00 usec  
 TE 298.0 K  
 D1 1.00000000 sec  
 TD0 1  
 SFO1 470.6394024 MHz  
 NUC1 19F  
 P1 15.00 usec  
 PLW1 11.70800018 W

F2 - Processing parameters  
 SI 65536  
 SF 470.6864712 MHz  
 WDW EM  
 SSB 0  
 LB 0.30 Hz  
 GB 0  
 PC 1.00

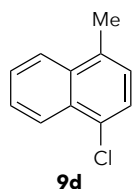

8.35  
 8.34  
 8.33  
 8.05  
 8.03  
 8.02  
 7.66  
 7.66  
 7.65  
 7.64  
 7.63  
 7.63  
 7.62  
 7.61  
 7.61  
 7.60  
 7.59  
 7.51  
 7.49  
 7.29  
 7.27  
 7.25

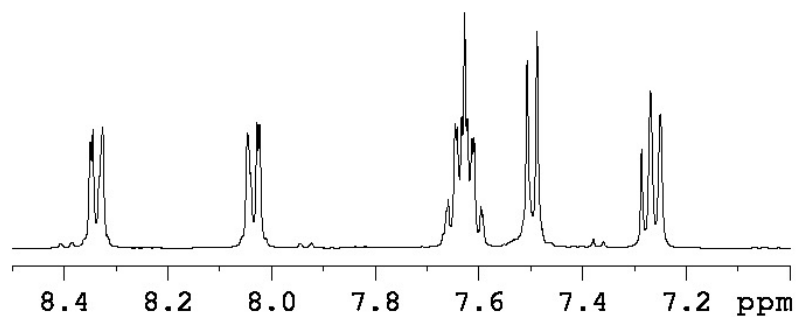

— 2.70

— 1.56  
— 1.29

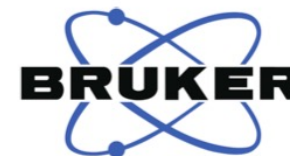

Current Data Parameters  
 NAME 5-SMR-156-final  
 EXPNO 10  
 PROCNO 1

F2 - Acquisition Parameter  
 Date\_ 20210902  
 Time 17.12 h  
 INSTRUM Avance Neo  
 PROBHD Z152088\_0031 (   
 PULPROG zg30  
 TD 65536  
 SOLVENT CDCl3  
 NS 16  
 DS 2  
 SWH 8196.722 Hz  
 FIDRES 0.250144 Hz  
 AQ 3.9976959 sec  
 RG 101  
 DW 61.000 usec  
 DE 13.89 usec  
 TE 298.2 K  
 D1 1.00000000 sec  
 TD0 1  
 SFO1 400.1324708 MHz  
 NUC1 1H  
 P0 2.67 usec  
 P1 8.00 usec  
 PLW1 24.03499985 W

F2 - Processing parameters  
 SI 65536  
 SF 400.1299991 MHz  
 WDW EM  
 SSB 0  
 LB 0.30 Hz  
 GB 0  
 PC 1.00

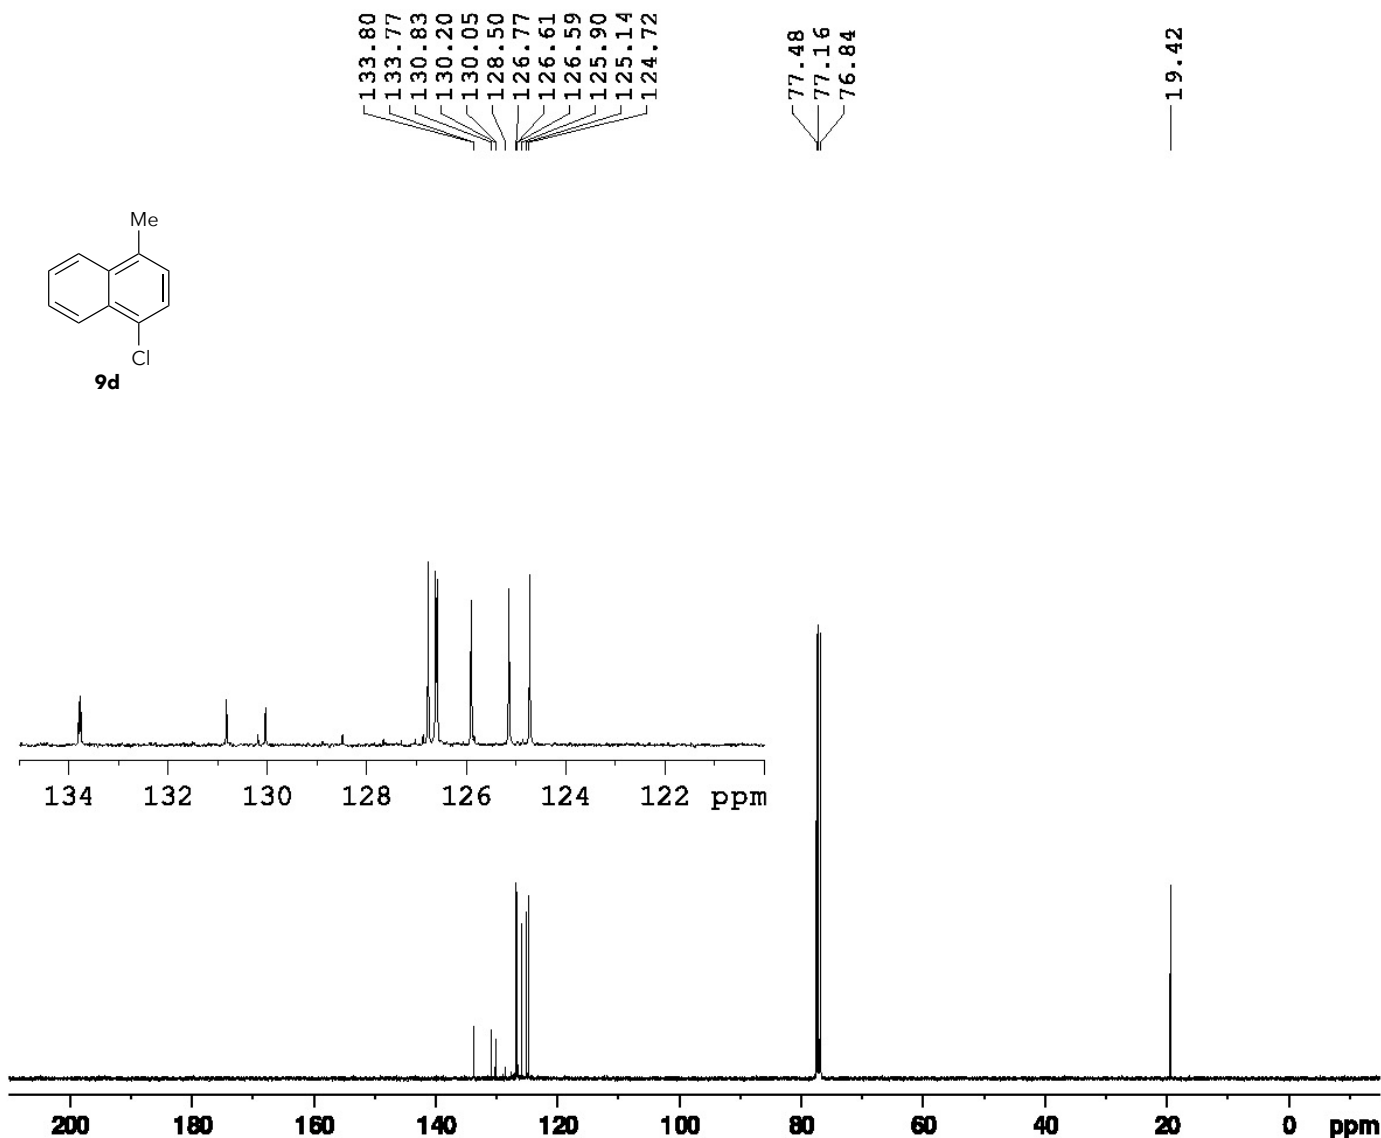

Current Data Parameters  
 NAME 5-SMR-156-final  
 EXPNO 11  
 PROCNO 1

F2 - Acquisition Parameter  
 Date\_ 20210902  
 Time 18.12 h  
 INSTRUM Avance Neo  
 PROBHD Z152088\_0031 (  
 PULPROG zgpg30  
 TD 65536  
 SOLVENT CDCl3  
 NS 1024  
 DS 4  
 SWH 23809.523 Hz  
 FIDRES 0.726609 Hz  
 AQ 1.3762560 sec  
 RG 8.125  
 DW 21.000 usec  
 DE 6.50 usec  
 TE 298.2 K  
 D1 2.00000000 sec  
 D11 0.03000000 sec  
 TD0 1  
 SFO1 100.6228298 MHz  
 NUC1 13C  
 P0 2.67 usec  
 P1 8.00 usec  
 PLW1 86.55400085 W  
 SFO2 400.1316005 MHz  
 NUC2 1H  
 CPDPRG[2] waltz65  
 PCPD2 90.00 usec  
 PLW2 24.03499985 W  
 PLW12 0.18990999 W  
 PLW13 0.09552100 W

F2 - Processing parameters  
 SI 32768  
 SF 100.6127555 MHz  
 WDW EM  
 SSB 0  
 LB 1.00 Hz  
 GB 0  
 PC 1.40

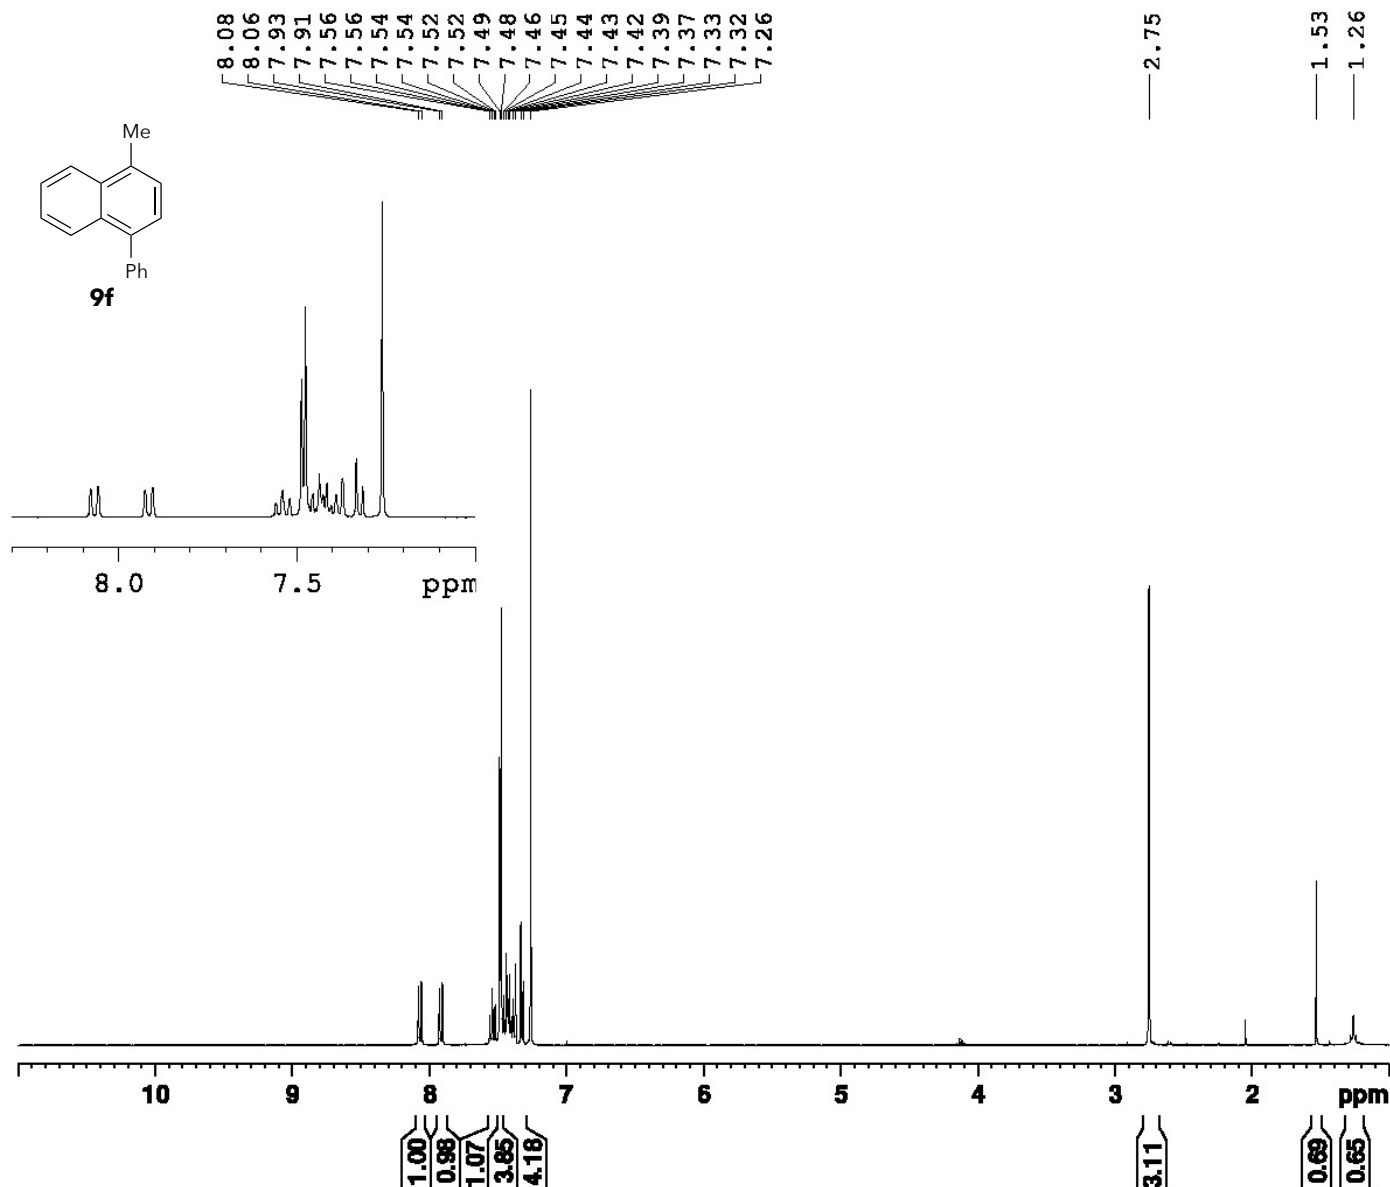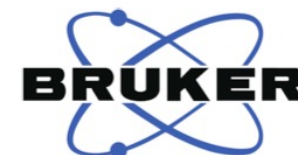

Current Data Parameters  
NAME 5-SMR-149  
EXPNO 10  
PROCNO 1

F2 - Acquisition Parameter  
Date\_ 20210803  
Time 14.52 h  
INSTRUM Avance Neo  
PROBHD Z152088\_0031 (  
PULPROG zg30  
TD 65536  
SOLVENT CDCl3  
NS 16  
DS 2  
SWH 8196.722 Hz  
FIDRES 0.250144 Hz  
AQ 3.9976959 sec  
RG 101  
DW 61.000 usec  
DE 13.89 usec  
TE 298.1 K  
D1 1.00000000 sec  
TD0 1  
SFO1 400.1324708 MHz  
NUC1 1H  
P0 2.67 usec  
P1 8.00 usec  
PLW1 24.03499985 W

F2 - Processing parameters  
SI 65536  
SF 400.1300093 MHz  
WDW EM  
SSB 0  
LB 0.30 Hz  
GB 0  
PC 1.00

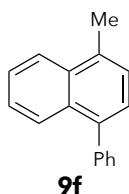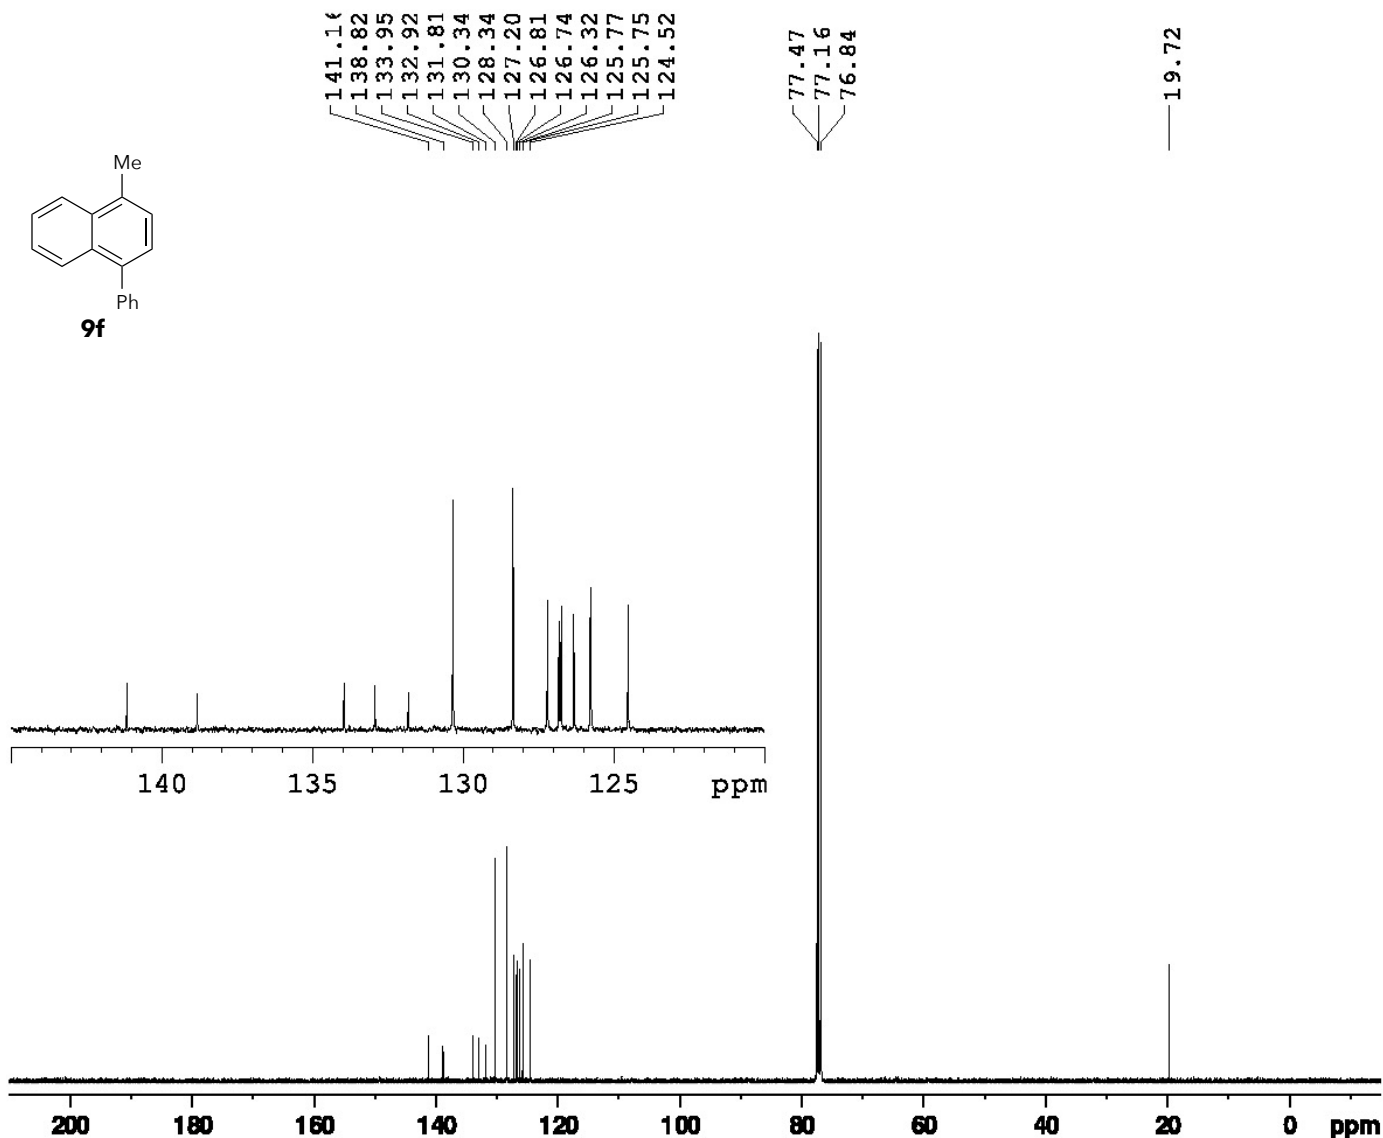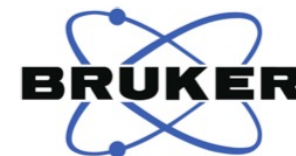

Current Data Parameters  
 NAME 5-SMR-149  
 EXPNO 12  
 PROCNO 1

F2 - Acquisition Parameter  
 Date\_ 20210906  
 Time 14.20 h  
 INSTRUM Avance Neo  
 PROBHD Z152088\_0031 (  
 PULPROG zgpg30  
 TD 65536  
 SOLVENT CDCl3  
 NS 1024  
 DS 4  
 SWH 23809.523 Hz  
 FIDRES 0.726609 Hz  
 AQ 1.3762560 sec  
 RG 8.125  
 DW 21.000 usec  
 DE 6.50 usec  
 TE 298.2 K  
 D1 2.00000000 sec  
 D11 0.03000000 sec  
 TD0 1  
 SFO1 100.6228298 MHz  
 NUC1 13C  
 P0 2.67 usec  
 P1 8.00 usec  
 PLW1 86.55400085 W  
 SFO2 400.1316005 MHz  
 NUC2 1H  
 CPDPRG[2] waltz65  
 PCPD2 90.00 usec  
 PLW2 24.03499985 W  
 PLW12 0.18990999 W  
 PLW13 0.09552100 W

F2 - Processing parameters  
 SI 32768  
 SF 100.6127551 MHz  
 WDW EM  
 SSB 0  
 LB 1.00 Hz  
 GB 0  
 PC 1.40

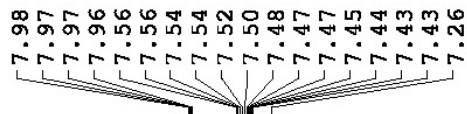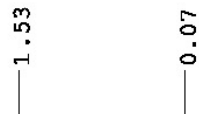

```

F2 - Acquisition Parameter
Date_      20210906
Time       14.26 h
INSTRUM    Avance Neo
PROBHD     Z152088_0031 (
PULPROG    zg30
TD          65536
SOLVENT     CDCl3
NS          16
DS          2
SWH         8196.722 Hz
FIDRES     0.250144 Hz
AQ          3.9976959 sec
RG          101
DW          61.000 usec
DE          13.89 usec
TE          298.2 K
D1          1.00000000 sec
TD0         1
SFO1       400.1324708 MHz
NUC1        1H
P0          2.67 usec
P1          8.00 usec
PLW1       24.03499985 W

```

```

F2 - Processing parameters
SI                65536
SF                400.1300095 MHz
WDW               EM
SSB               0
LB                0.30 Hz
GB               0
PC                1.00

```

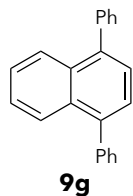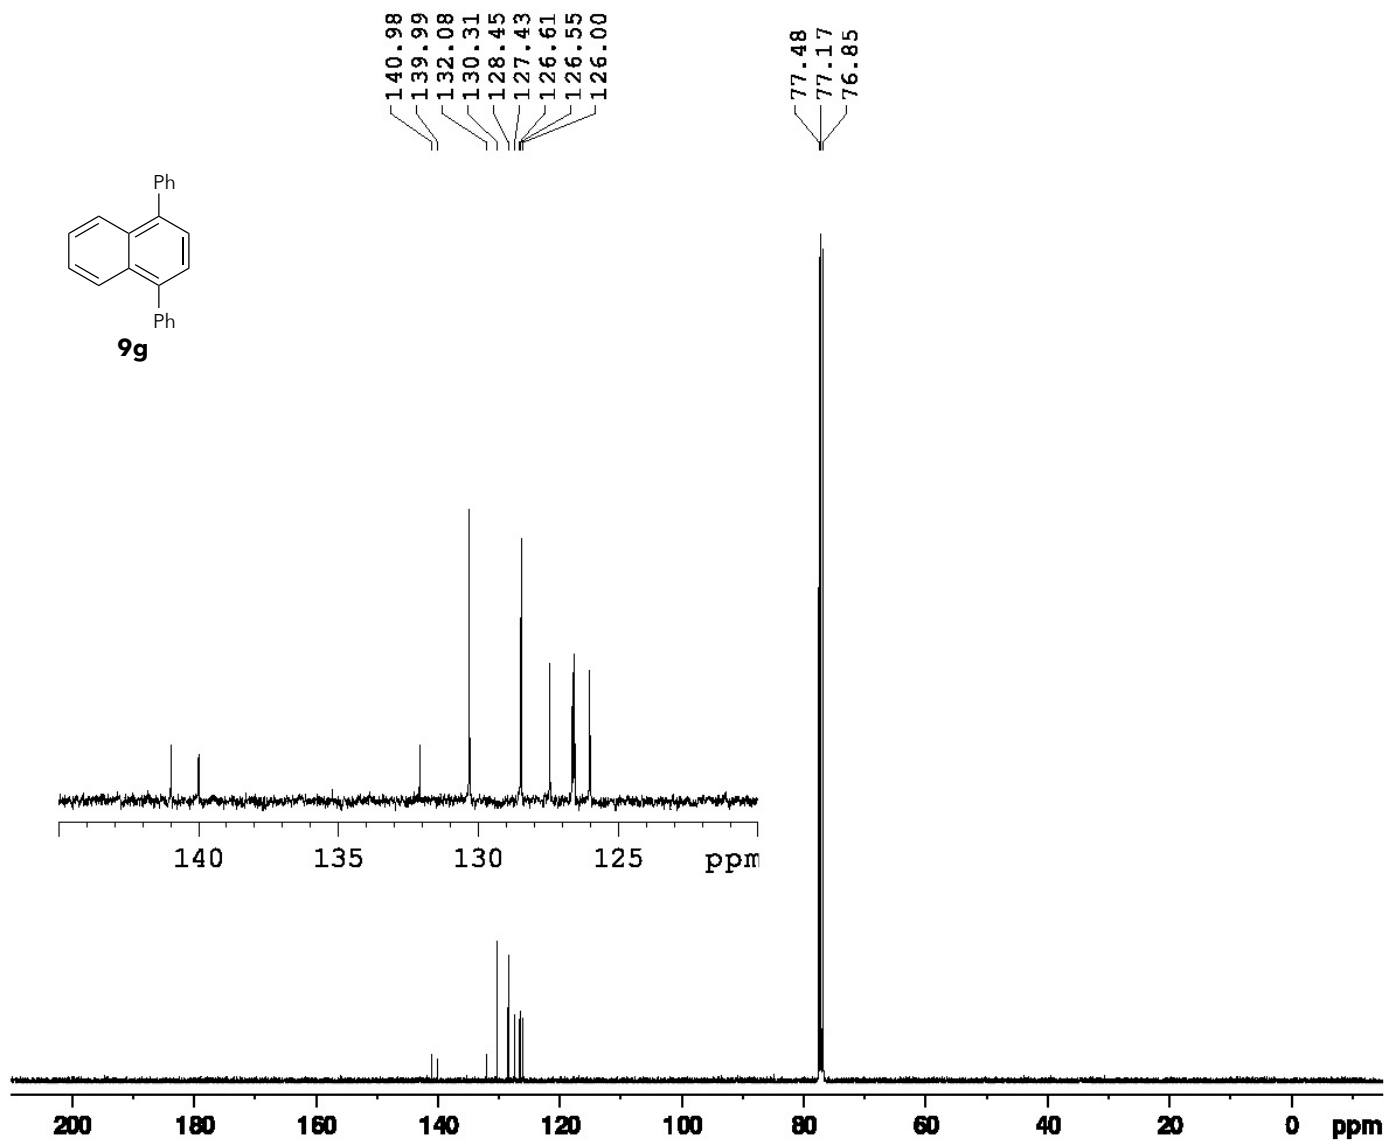

Current Data Parameters  
NAME 5-SMR-163-full  
EXPNO 12  
PROCNO 1

F2 - Acquisition Parameter  
Date\_ 20210906  
Time 15.27 h  
INSTRUM Avance Neo  
PROBHD Z152088\_0031 (  
PULPROG zgpg30  
TD 65536  
SOLVENT CDCl3  
NS 1024  
DS 4  
SWH 23809.523 Hz  
FIDRES 0.726609 Hz  
AQ 1.3762560 sec  
RG 8.125  
DW 21.000 usec  
DE 6.50 usec  
TE 298.2 K  
D1 2.00000000 sec  
D11 0.03000000 sec  
TD0 1  
SFO1 100.6228298 MHz  
NUC1 13C  
P0 2.67 usec  
P1 8.00 usec  
PLW1 86.55400085 W  
SFO2 400.1316005 MHz  
NUC2 1H  
CPDPRG[2] waltz65  
PCPD2 90.00 usec  
PLW2 24.03499985 W  
PLW12 0.18990999 W  
PLW13 0.09552100 W

F2 - Processing parameters  
SI 32768  
SF 100.6127534 MHz  
WDW EM  
SSB 0  
LB 1.00 Hz  
GB 0  
PC 1.40

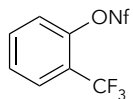

S11

7.77  
7.76  
7.68  
7.68  
7.66  
7.65  
7.54  
7.52  
7.51  
7.50  
7.48  
7.26

1.53  
1.28



Current Data Parameters  
NAME ER-6-CF3PhONf  
EXPNO 10  
PROCNO 1

F2 - Acquisition Parameter  
Date\_ 20200709  
Time 15.43 h  
INSTRUM spect  
PROBHD zg30  
PULPROG zg30  
TD 65536  
SOLVENT CDC13  
NS 64  
DS 2  
SWH 12019.230 Hz  
FIDRES 0.366798 Hz  
AQ 2.7262976 sec  
RG 4.41  
DW 41.600 usec  
DE 10.00 usec  
TE 300.0 K  
D1 1.00000000 sec  
TD0 1  
SFO1 600.1337060 MHz  
NUC1 1H  
P0 2.67 usec  
P1 8.00 usec  
PLW1 5.59999990 W

F2 - Processing parameters  
SI 65536  
SF 600.1300162 MHz  
WDW EM  
SSB 0  
LB 0.30 Hz  
GB 0  
PC 1.00

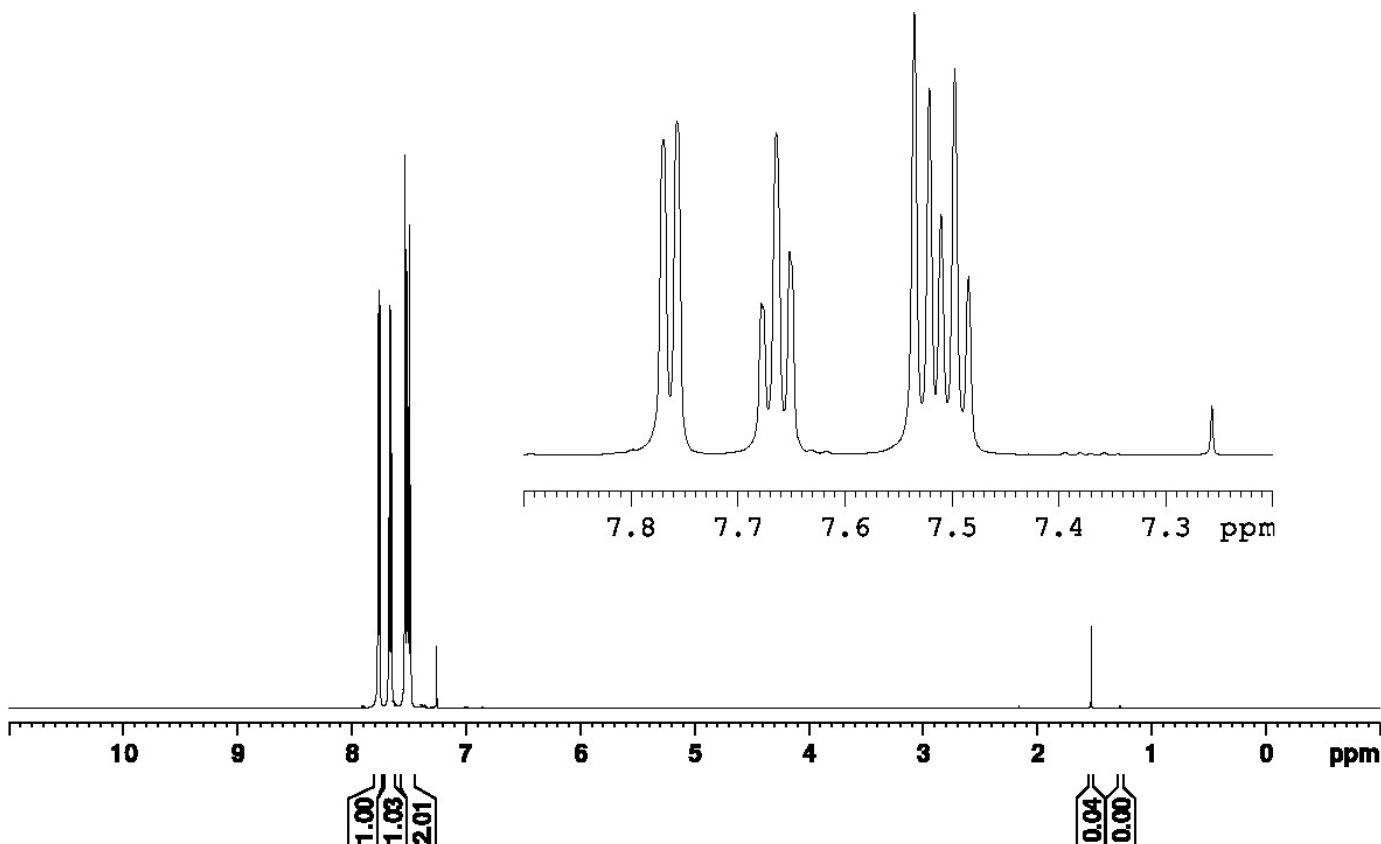

146.44  
146.43  
134.17  
128.41  
128.29  
128.25  
128.22  
128.19  
124.96  
123.69  
123.47  
123.15  
122.61  
121.34  
120.37  
120.15  
119.93  
119.54  
118.46  
118.24  
118.02  
116.91  
116.67  
116.55  
116.43  
116.33  
116.11  
114.91  
114.67  
114.42  
112.90  
112.66  
112.42  
112.12  
111.92  
111.71  
110.60  
110.53  
110.33  
110.12  
109.91  
109.70  
109.02  
108.81  
108.76  
108.59  
108.54  
108.32  
108.28  
108.11  
77.37  
77.16  
76.95

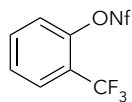

S11

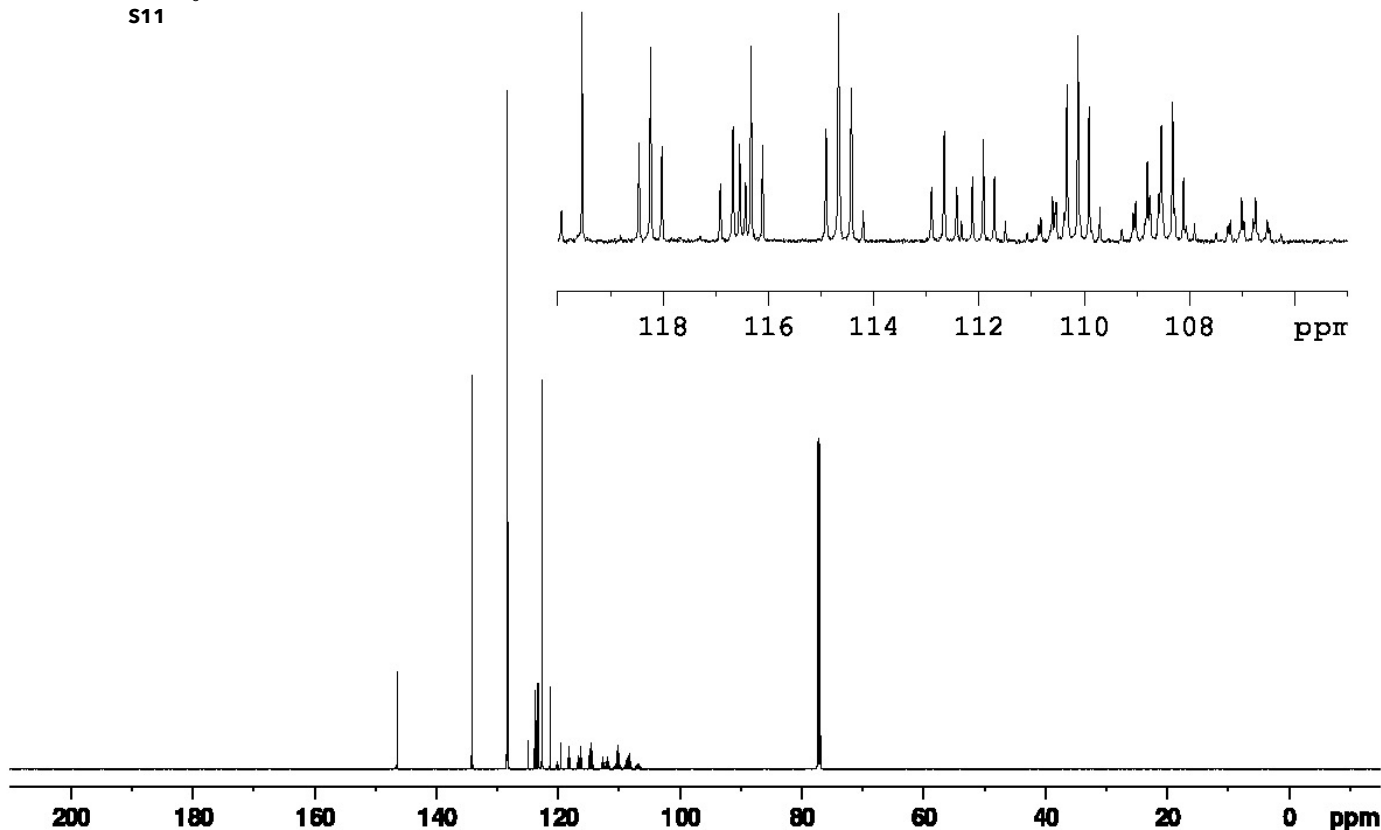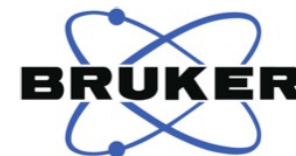

Current Data Parameters  
NAME ER-6-CF3PhONf  
EXPNO 11  
PROCNO 1

F2 - Acquisition Parameter  
Date\_ 20200709  
Time 16.35 h  
INSTRUM spect  
PROBHD z127277\_0002 (  
PULPROG zgpg30  
TD 65536  
SOLVENT CDCl3  
NS 1024  
DS 4  
SWH 36057.691 Hz  
FIDRES 1.100393 Hz  
AQ 0.9087659 sec  
RG 184.4  
DW 13.867 usec  
DE 18.00 usec  
TE 300.0 K  
D1 2.00000000 sec  
D11 0.03000000 sec  
TD0 1  
SFO1 150.9178981 MHz  
NUC1 13C  
P0 4.00 usec  
P1 12.00 usec  
PLW1 91.00000000 W  
SFO2 600.1324005 MHz  
NUC2 1H  
CPDPRG[2] waltz16  
PCPD2 70.00 usec  
PLW2 5.59999990 W  
PLW12 0.07314300 W  
PLW13 0.03679000 W

F2 - Processing parameters  
SI 32768  
SF 150.9027731 MHz  
WDW EM  
SSB 0  
LB 1.00 Hz  
GB 0  
PC 1.40



**S11**

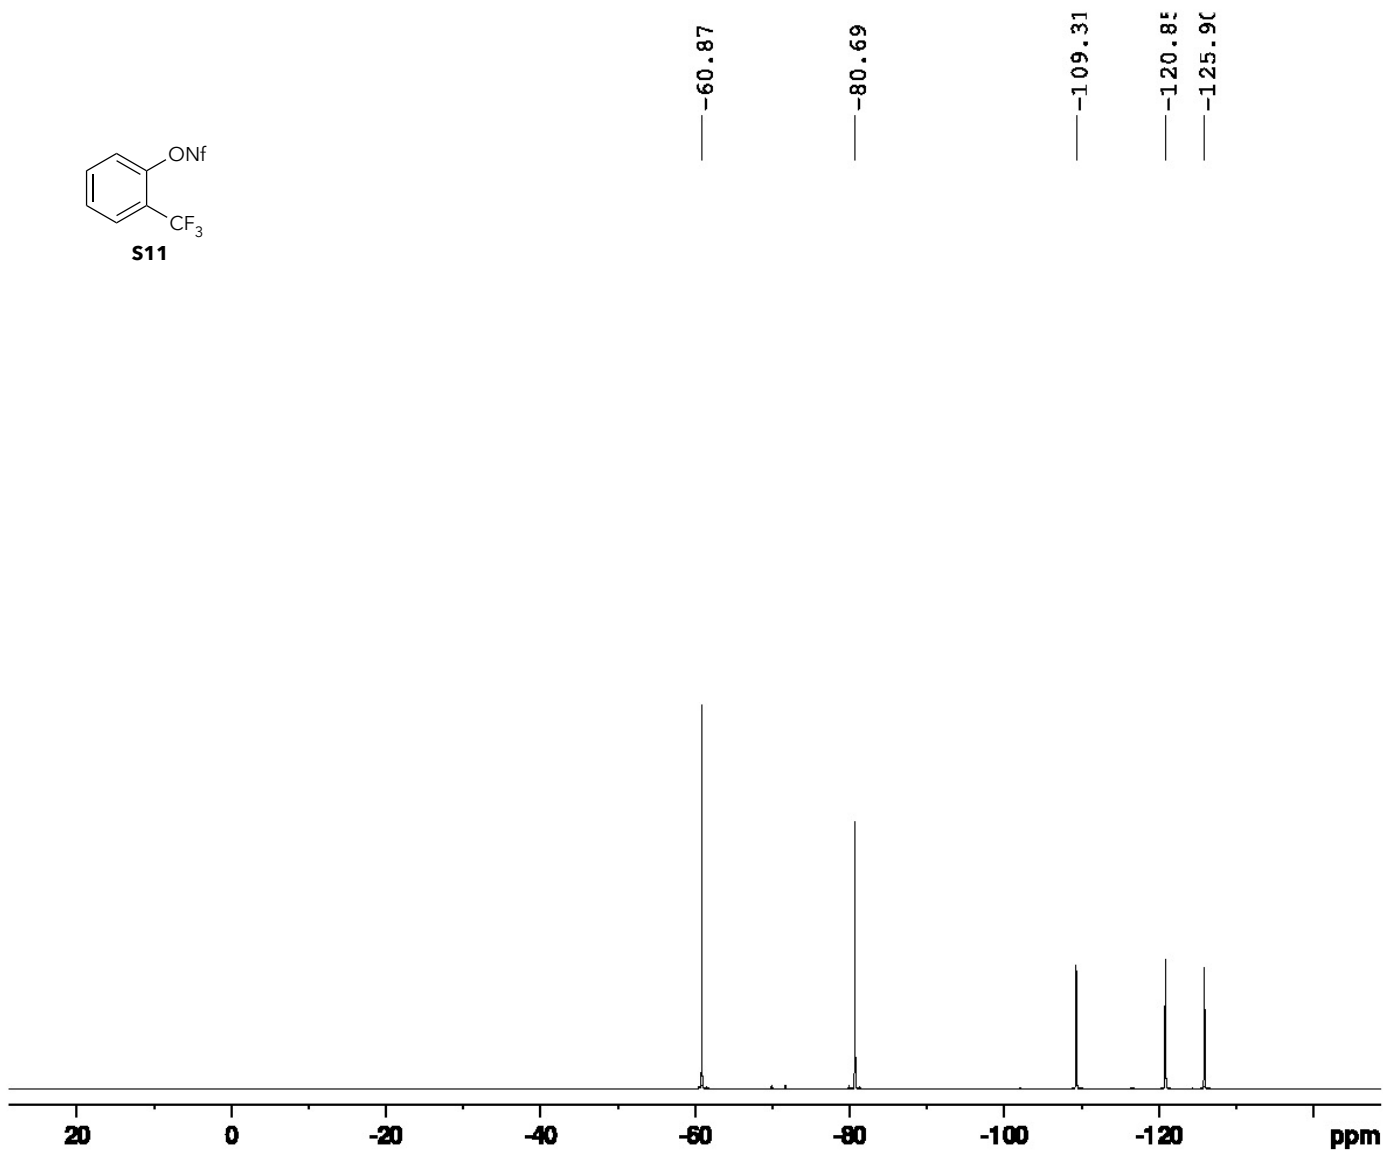

Current Data Parameters  
 NAME ER-6-CF3PhONf  
 EXPNO 4  
 PROCNO 1

F2 - Acquisition Parameter  
 Date\_ 20201005  
 Time 7.13  
 INSTRUM spect  
 PROBHD 5 mm QNP 1H/13  
 PULPROG zgpg30  
 TD 32768  
 SOLVENT C6D6  
 NS 64  
 DS 0  
 SWH 50125.312 Hz  
 FIDRES 1.529703 Hz  
 AQ 0.3268608 sec  
 RG 645.1  
 DW 9.975 usec  
 DE 6.00 usec  
 TE 683.2 K  
 D1 1.50000000 sec  
 TD0 1

===== CHANNEL f1 =====  
 NUC1 19F  
 P1 9.00 usec  
 PL1 0 dB  
 SFO1 282.4250465 MHz

F2 - Processing parameters  
 SI 65536  
 SF 282.4419930 MHz  
 WDW EM  
 SSB 0  
 LB 0.30 Hz  
 GB 0  
 PC 1.00

8.12  
8.10  
7.96  
7.94  
7.92  
7.90  
7.90  
7.70  
7.70  
7.69  
7.68  
7.67  
7.66  
7.65  
7.65  
7.63  
7.63  
7.62  
7.61  
7.54  
7.52  
7.50  
7.50  
7.49  
7.48  
7.28

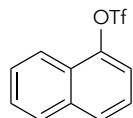

S12

1.56

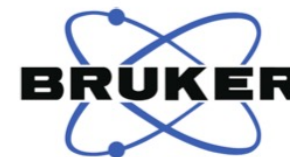

Current Data Parameters  
NAME EKB-1-184  
EXPNO 10  
PROCNO 1

F2 - Acquisition Parameter  
Date\_ 20210702  
Time 12.05 h  
INSTRUM Avance Neo  
PROBHD Z152088\_0031 (   
PULPROG zg30  
TD 65536  
SOLVENT CDCl3  
NS 16  
DS 2  
SWH 8196.722 Hz  
FIDRES 0.250144 Hz  
AQ 3.9976959 sec  
RG 101  
DW 61.000 usec  
DE 13.89 usec  
TE 298.0 K  
D1 1.00000000 sec  
TD0 1  
SFO1 400.1324708 MHz  
NUC1 1H  
P0 2.67 usec  
P1 8.00 usec  
PLW1 24.03499985 W

F2 - Processing parameters  
SI 65536  
SF 400.1300000 MHz  
WDW EM  
SSB 0  
LB 0.30 Hz  
GB 0  
PC 1.00

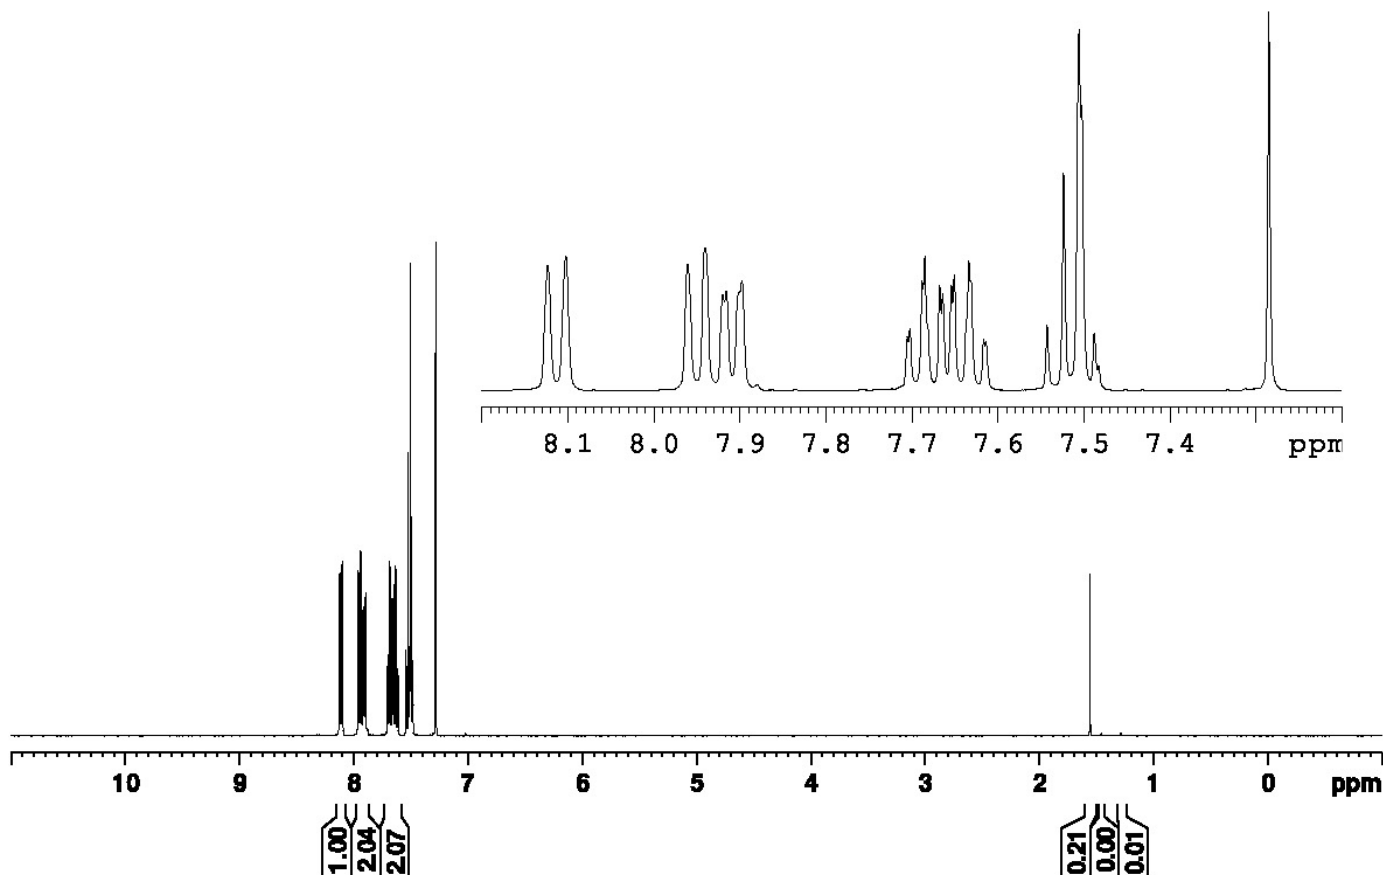



S12

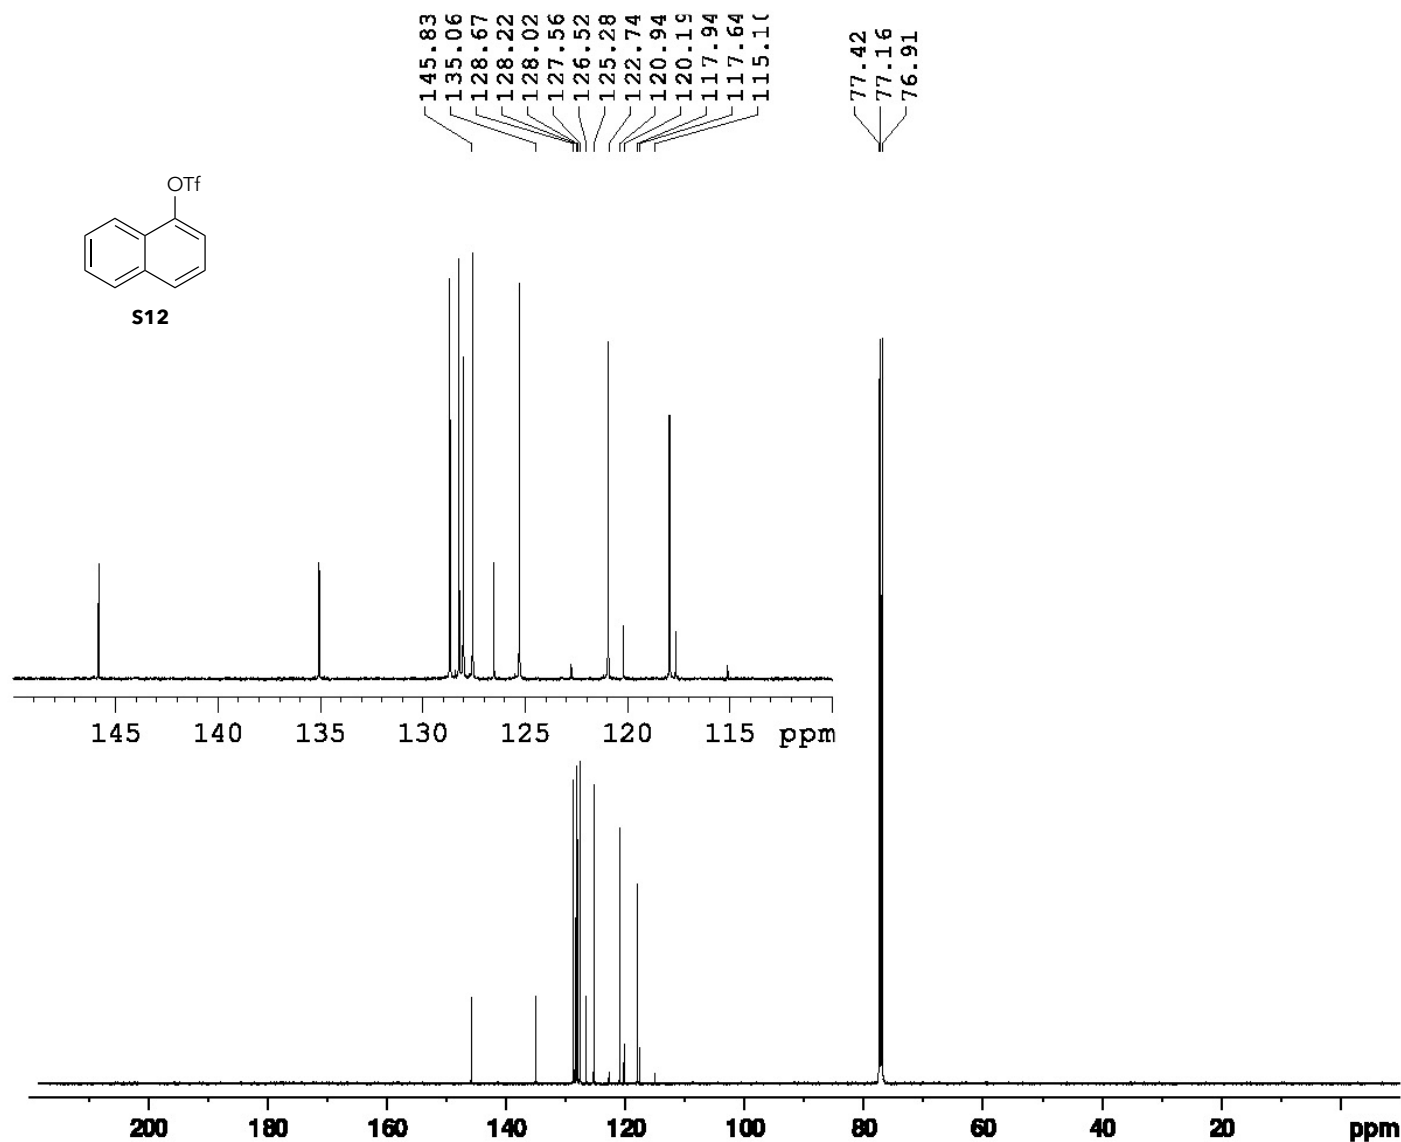

Current Data Parameters  
NAME EKB-1-184  
EXPNO 22  
PROCNO 1

F2 - Acquisition Parameters  
Date\_ 20211007  
Time 12.53 h  
INSTRUM spect  
PROBHD z125869\_0055 (   
PULPROG zgpg30  
TD 65536  
SOLVENT CDCl3  
NS 1024  
DS 4  
SWH 29761.904 Hz  
FIDRES 0.908261 Hz  
AQ 1.1010048 sec  
RG 190.44  
DW 16.800 usec  
DE 18.00 usec  
TE 298.0 K  
D1 2.00000000 sec  
D11 0.03000000 sec  
TD0 1  
SFO1 125.7955118 MHz  
NUC1 13C  
P0 3.33 usec  
P1 10.00 usec  
PLW1 56.90299988 W  
SFO2 500.2320009 MHz  
NUC2 1H  
CPDPRG[2] waltz16  
PCPD2 80.00 usec  
PLW2 11.44699955 W  
PLW12 0.25756001 W  
PLW13 0.12955000 W

F2 - Processing parameters  
SI 32768  
SF 125.7829156 MHz  
WDW EM  
SSB 0  
LB 1.00 Hz  
GB 0  
PC 1.40

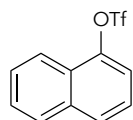

**S12**

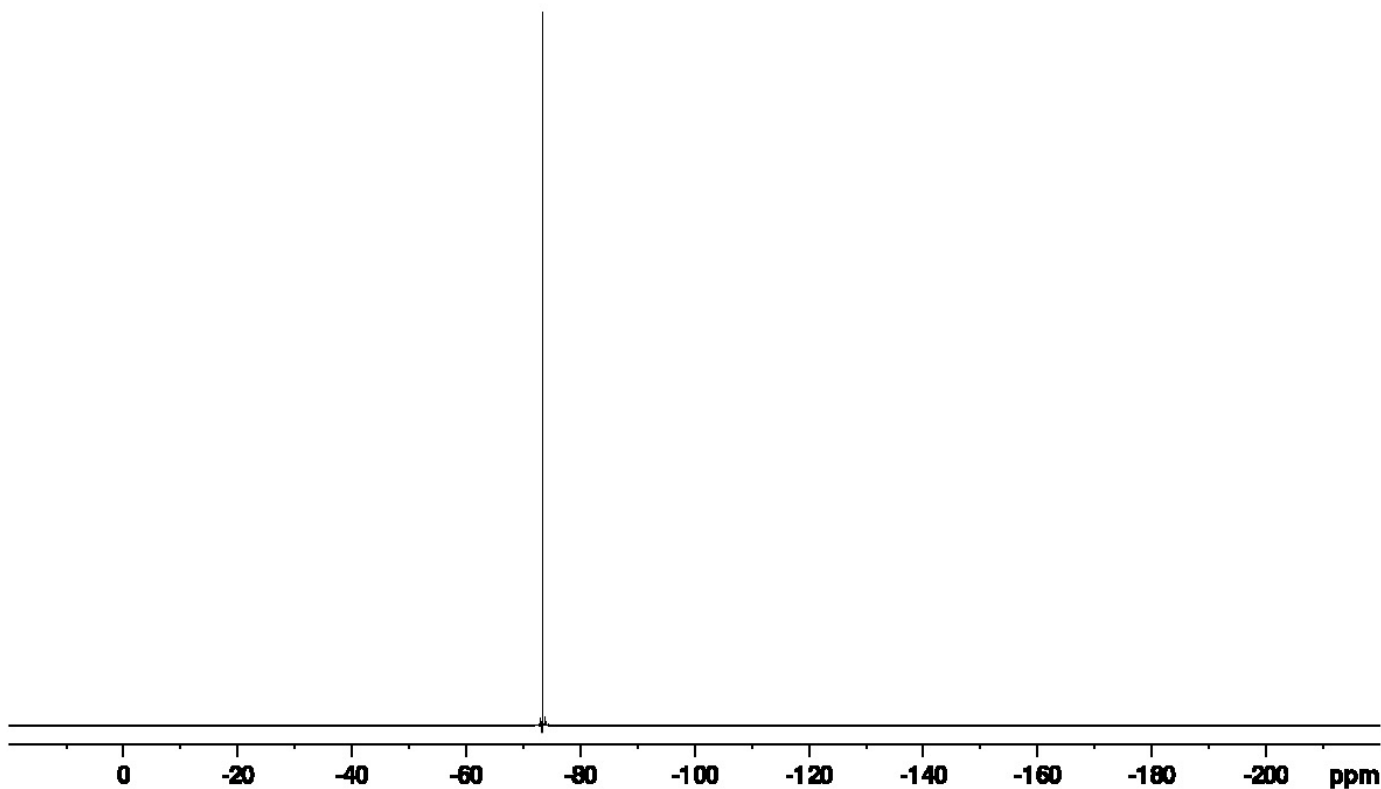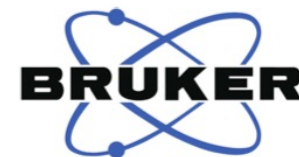

Current Data Parameters  
 NAME EKB-1-184  
 EXPNO 11  
 PROCNO 2

F2 - Acquisition Parameter  
 Date\_ 20210702  
 Time 12.13 h  
 INSTRUM Avance Neo  
 PROBHD z152088\_0031 (  
 PULPROG zgig  
 TD 130892  
 SOLVENT CDCl3  
 NS 16  
 DS 4  
 SWH 90909.094 Hz  
 FIDRES 1.389070 Hz  
 AQ 0.7199060 sec  
 RG 101  
 DW 5.500 usec  
 DE 6.50 usec  
 TE 298.1 K  
 D1 1.00000000 sec  
 D11 0.03000000 sec  
 TD0 1  
 SFO1 376.4607164 MHz  
 NUC1 19F  
 P1 12.00 usec  
 PLW1 31.08900070 W  
 SFO2 400.1316005 MHz  
 NUC2 1H  
 CPDPRG[2] waltz16  
 PCPD2 90.00 usec  
 PLW2 24.03499985 W  
 PLW12 0.18990999 W

F2 - Processing parameters  
 SI 65536  
 SF 376.4983662 MHz  
 WDW EM  
 SSB 0  
 LB 0.30 Hz  
 GB 0  
 PC 1.00

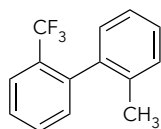

S13

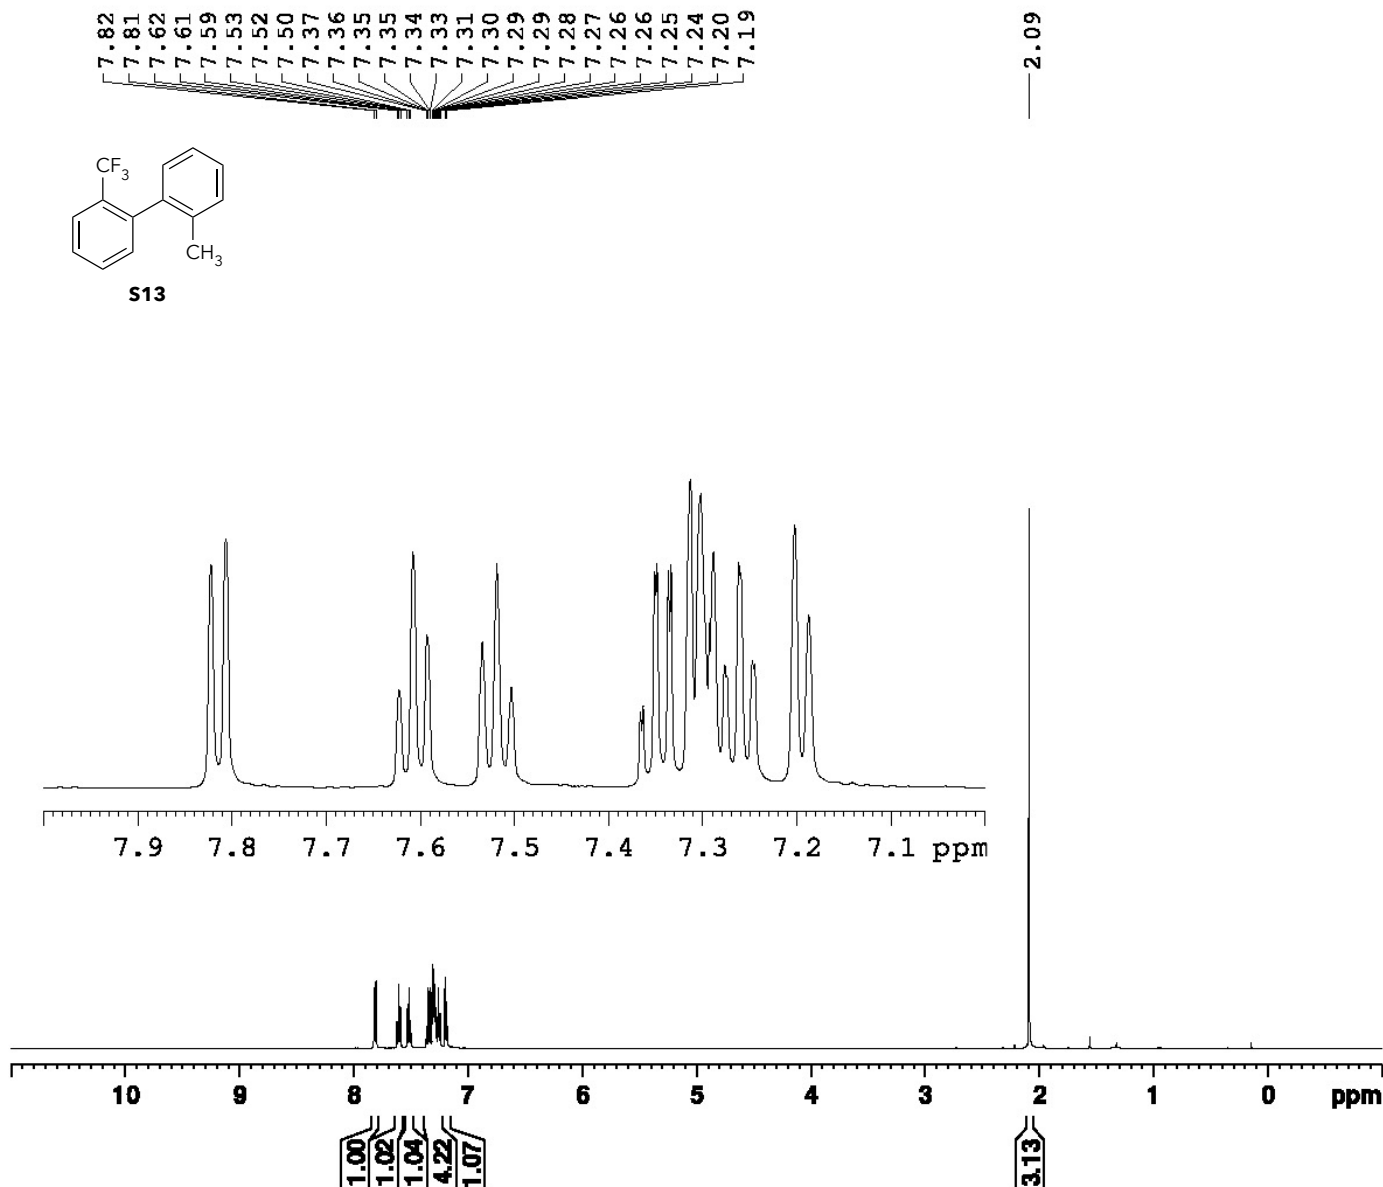

Current Data Parameters  
NAME 6-SMR-4  
EXPNO 30  
PROCNO 1

F2 - Acquisition Parameter  
Date\_ 20211008  
Time 15.37 h  
INSTRUM spect  
PROBHD Z125869\_0055 (   
PULPROG zg30  
TD 65536  
SOLVENT CDCl3  
NS 64  
DS 2  
SWH 10000.000 Hz  
FIDRES 0.305176 Hz  
AQ 3.2767999 sec  
RG 37.93  
DW 50.000 usec  
DE 16.00 usec  
TE 298.0 K  
D1 2.00000000 sec  
TD0 1  
SFO1 500.2330889 MHz  
NUC1 1H  
P0 4.00 usec  
P1 12.00 usec  
PLW1 11.44699955 W

F2 - Processing parameters  
SI 65536  
SF 500.2299955 MHz  
WDW EM  
SSB 0  
LB 0.30 Hz  
GB 0  
PC 1.00



S13

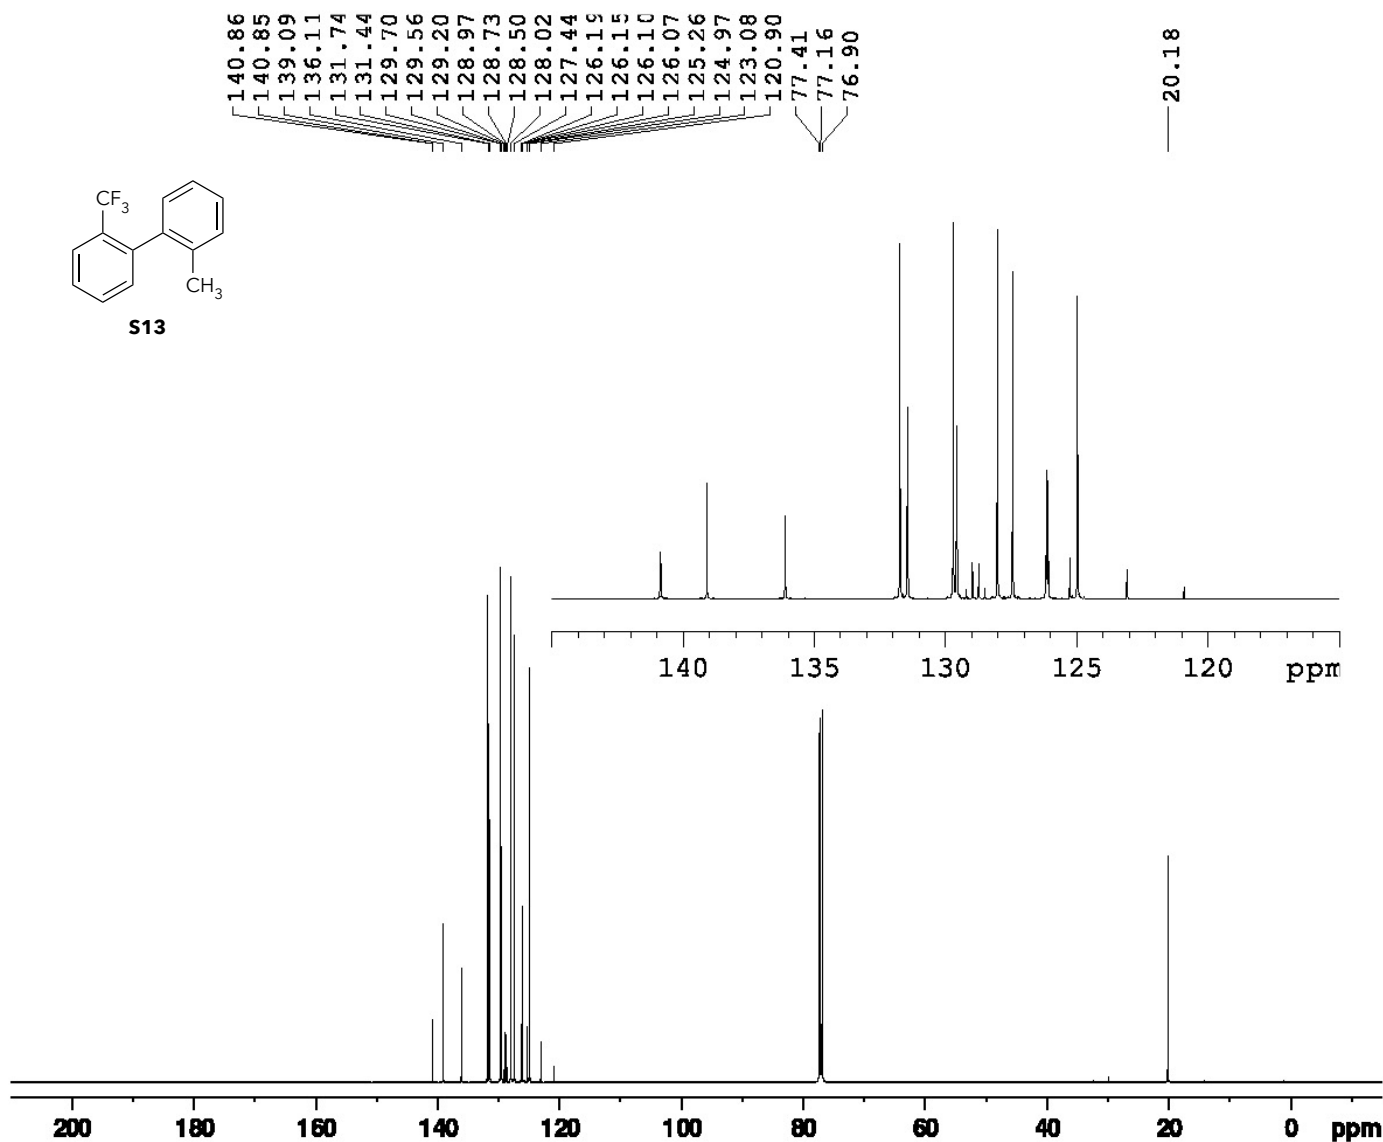

Current Data Parameters  
NAME 6-SMR-4  
EXPNO 32  
PROCNO 1

F2 - Acquisition Parameter  
Date\_ 20211008  
Time 17.31 h  
INSTRUM spect  
PROBHD z125869\_0055 (  
PULPROG zgpg30  
TD 65536  
SOLVENT CDCl3  
NS 2048  
DS 4  
SWH 29761.904 Hz  
FIDRES 0.908261 Hz  
AQ 1.1010048 sec  
RG 190.44  
DW 16.800 usec  
DE 18.00 usec  
TE 298.0 K  
D1 2.00000000 sec  
D11 0.03000000 sec  
TD0 1  
SFO1 125.7955118 MHz  
NUC1 13C  
P0 3.33 usec  
P1 10.00 usec  
PLW1 56.90299988 W  
SFO2 500.2320009 MHz  
NUC2 1H  
CPDPRG[2] waltz16  
PCPD2 80.00 usec  
PLW2 11.44699955 W  
PLW12 0.25756001 W  
PLW13 0.12955000 W

F2 - Processing parameters  
SI 32768  
SF 125.7829185 MHz  
WDW EM  
SSB 0  
LB 1.00 Hz  
GB 0  
PC 1.40



**S13**

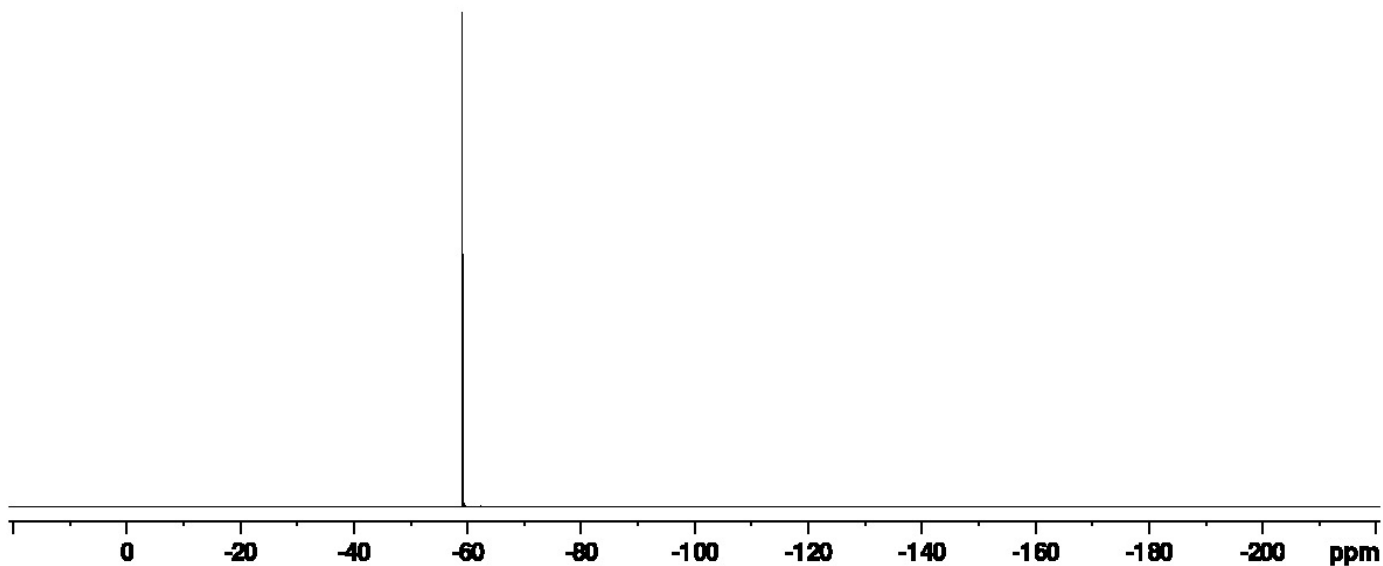

Current Data Parameters  
 NAME 6-SMR-4  
 EXPNO 31  
 PROCNO 2

F2 - Acquisition Parameter  
 Date\_ 20211008  
 Time 15.39 h  
 INSTRUM spect  
 PROBHD Z125869\_0055 (   
 PULPROG zgfglqn  
 TD 130892  
 SOLVENT CDCl3  
 NS 16  
 DS 4  
 SWH 113636.367 Hz  
 FIDRES 1.736338 Hz  
 AQ 0.5759248 sec  
 RG 17.98  
 DW 4.400 usec  
 DE 18.00 usec  
 TE 298.0 K  
 D1 1.00000000 sec  
 TD0 1  
 SFO1 470.6394024 MHz  
 NUC1 19F  
 P1 15.00 usec  
 PLW1 11.70800018 W

F2 - Processing parameters  
 SI 65536  
 SF 470.6864712 MHz  
 WDW EM  
 SSB 0  
 LB 0.30 Hz  
 GB 0  
 PC 1.00

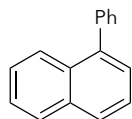

S14

7.94  
7.91  
7.89  
7.87  
7.56  
7.54  
7.52  
7.51  
7.49  
7.46  
7.45  
7.44  
7.44  
7.25

1.52  
1.28



Current Data Parameters  
NAME 5-SMR-153  
EXPNO 11  
PROCNO 1

F2 - Acquisition Parameter  
Date\_ 20210802  
Time 12.33 h  
INSTRUM Avance Neo  
PROBHD Z152088\_0031 (   
PULPROG zg30  
TD 65536  
SOLVENT CDCl3  
NS 16  
DS 2  
SWH 8196.722 Hz  
FIDRES 0.250144 Hz  
AQ 3.9976959 sec  
RG 101  
DW 61.000 usec  
DE 13.89 usec  
TE 298.2 K  
D1 1.00000000 sec  
TD0 1  
SFO1 400.1324708 MHz  
NUC1 1H  
P0 2.67 usec  
P1 8.00 usec  
PLW1 24.03499985 W

F2 - Processing parameters  
SI 65536  
SF 400.1300138 MHz  
WDW EM  
SSB 0  
LB 0.30 Hz  
GB 0  
PC 1.00

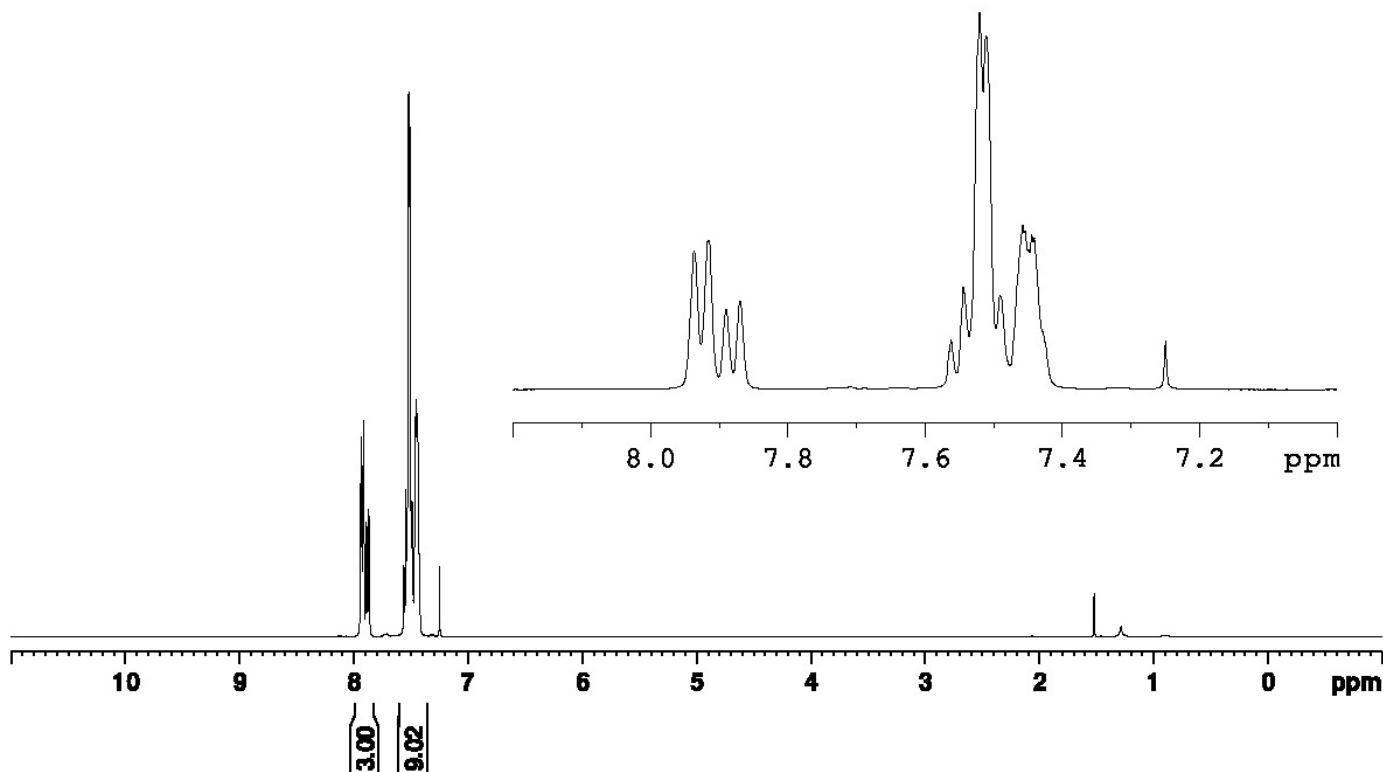

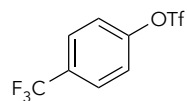

**S15b**

7.79  
7.77  
7.54  
7.46  
7.44  
7.28  
7.02

1.56  
1.46  
1.28

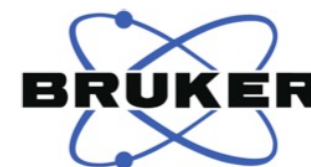

Current Data Parameters  
NAME 6-SMR-25  
EXPNO 10  
PROCNO 1

F2 - Acquisition Parameter  
Date\_ 20211105  
Time 20.28 h  
INSTRUM Avance Neo  
PROBHD Z152088\_0031 (  
PULPROG zg30  
TD 65536  
SOLVENT CDCl3  
NS 16  
DS 2  
SWH 8196.722 Hz  
FIDRES 0.250144 Hz  
AQ 3.9976959 sec  
RG 101  
DW 61.000 usec  
DE 13.89 usec  
TE 298.0 K  
D1 1.00000000 sec  
TD0 1  
SFO1 400.1324708 MHz  
NUC1 1H  
P0 2.67 usec  
P1 8.00 usec  
PLW1 24.03499985 W

F2 - Processing parameters  
SI 65536  
SF 400.1300097 MHz  
WDW EM  
SSB 0  
LB 0.30 Hz  
GB 0  
PC 1.00

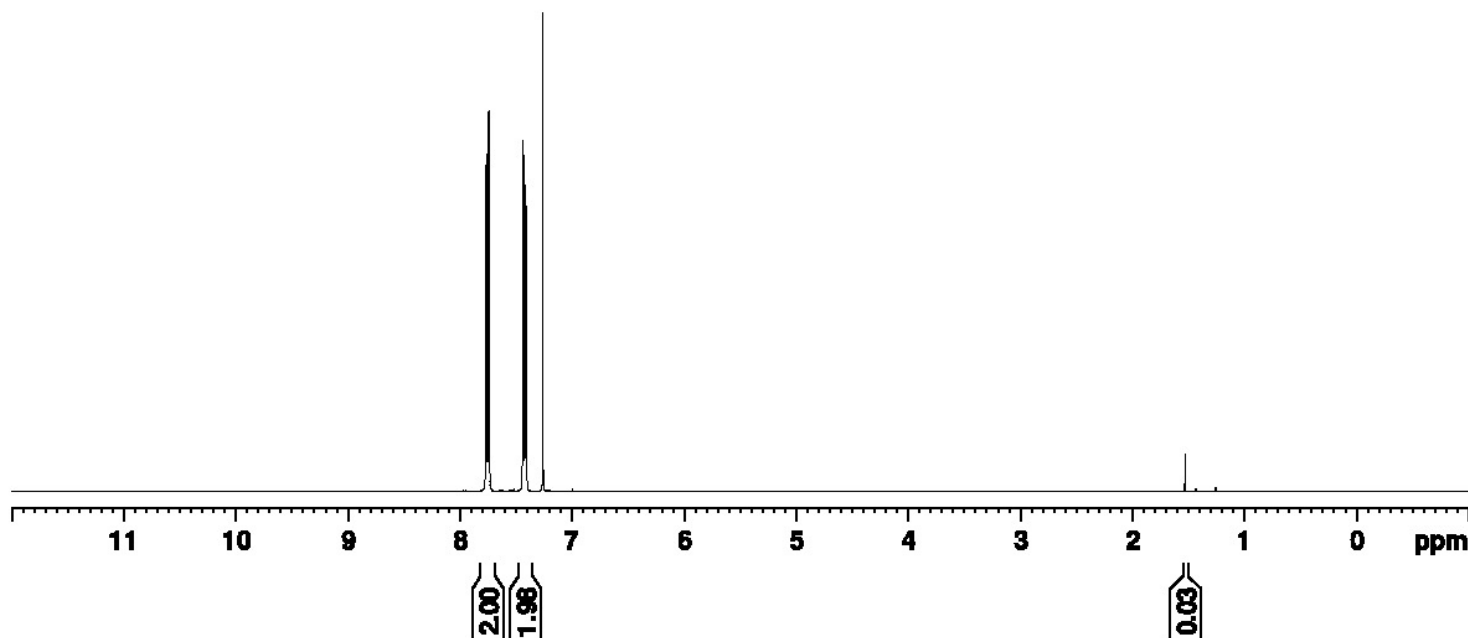

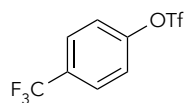

S15b

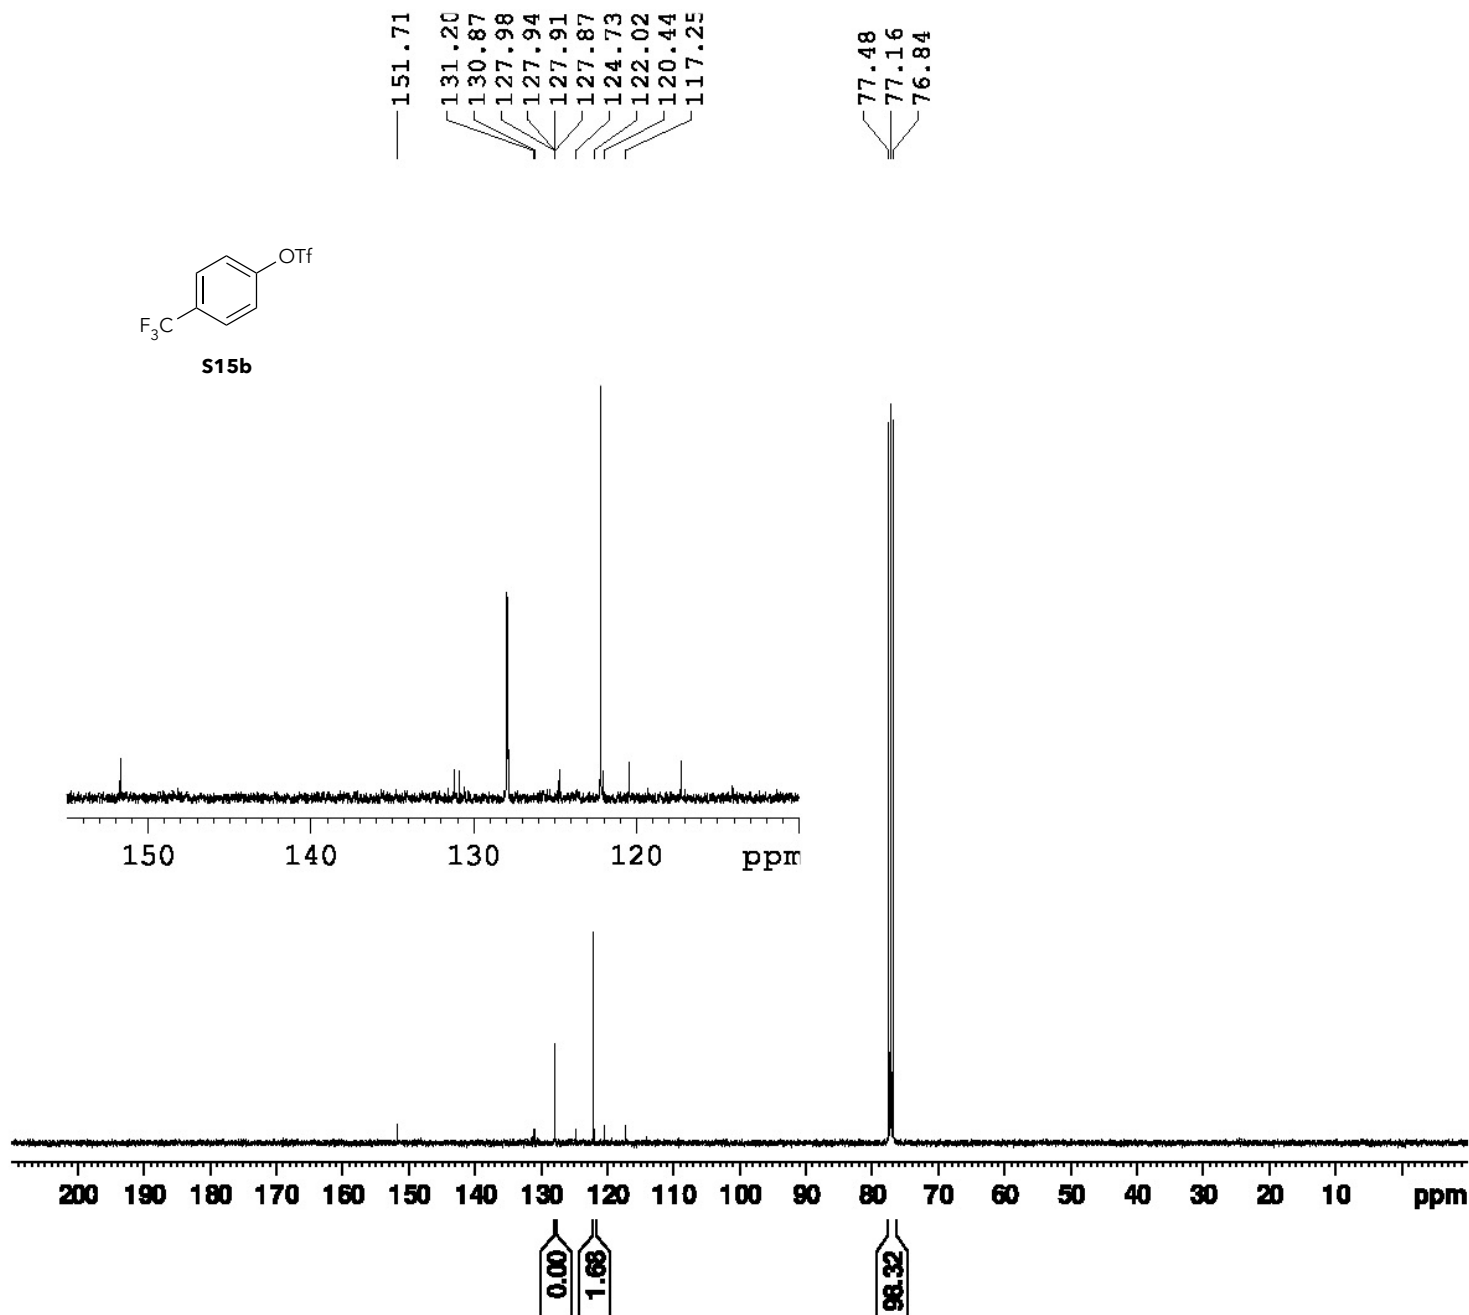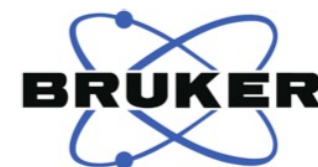

Current Data Parameters  
 NAME 6-SMR-25  
 EXPNO 11  
 PROCNO 1

F2 - Acquisition Parameter  
 Date\_ 20211105  
 Time 21.29 h  
 INSTRUM Avance Neo  
 PROBHD Z152088\_0031 (  
 PULPROG zgpg30  
 TD 65536  
 SOLVENT CDCl3  
 NS 1024  
 DS 4  
 SWH 23809.523 Hz  
 FIDRES 0.726609 Hz  
 AQ 1.3762560 sec  
 RG 8.125  
 DW 21.000 usec  
 DE 6.50 usec  
 TE 298.0 K  
 D1 2.00000000 sec  
 D11 0.03000000 sec  
 TD0 1  
 SFO1 100.6228298 MHz  
 NUC1 13C  
 P0 2.67 usec  
 P1 8.00 usec  
 PLW1 86.55400085 W  
 SFO2 400.1316005 MHz  
 NUC2 1H  
 CPDPRG[2] waltz65  
 PCPD2 90.00 usec  
 PLW2 24.03499985 W  
 PLW12 0.18990999 W  
 PLW13 0.09552100 W

F2 - Processing parameters  
 SI 32768  
 SF 100.6127535 MHz  
 WDW EM  
 SSB 0  
 LB 1.00 Hz  
 GB 0  
 PC 1.40

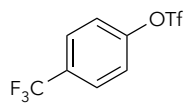

**S15b**

— -64.22  
— -74.26



Current Data Parameters  
NAME 6-SMR-25  
EXPNO 12  
PROCNO 1

F2 - Acquisition Parameter  
Date\_ 20211105  
Time 21.32 h  
INSTRUM Avance Neo  
PROBHD Z152088\_0031 (  
PULPROG zg  
TD 131072  
SOLVENT CDCl3  
NS 16  
DS 4  
SWH 90909.094 Hz  
FIDRES 1.387163 Hz  
AQ 0.7208960 sec  
RG 101  
DW 5.500 usec  
DE 6.50 usec  
TE 298.0 K  
D1 1.00000000 sec  
TD0 1  
SFO1 376.4607164 MHz  
NUC1 19F  
P1 12.00 usec  
PLW1 31.08900070 W

F2 - Processing parameters  
SI 65536  
SF 376.4989587 MHz  
WDW EM  
SSB 0  
LB 0.30 Hz  
GB 0  
PC 1.00

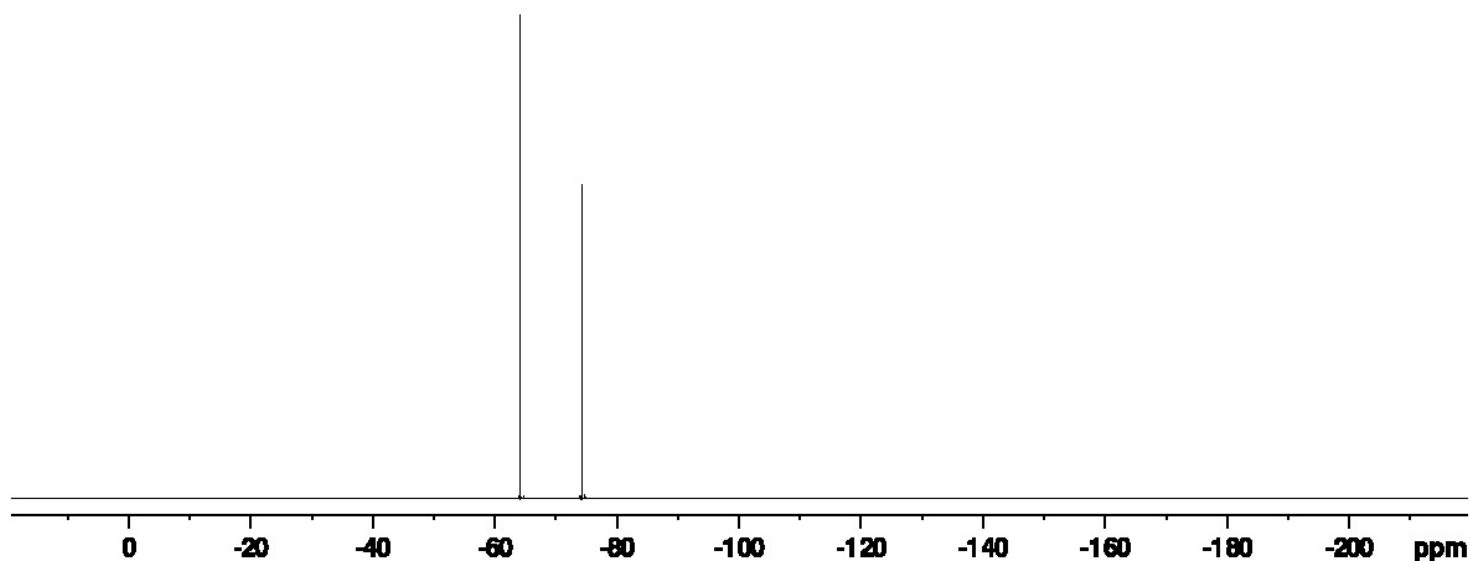

## B. Stoichiometric Oxidative Addition Studies with 3a and 3b

### 1. Experiments from Table 3 and with Deuterated Solvents

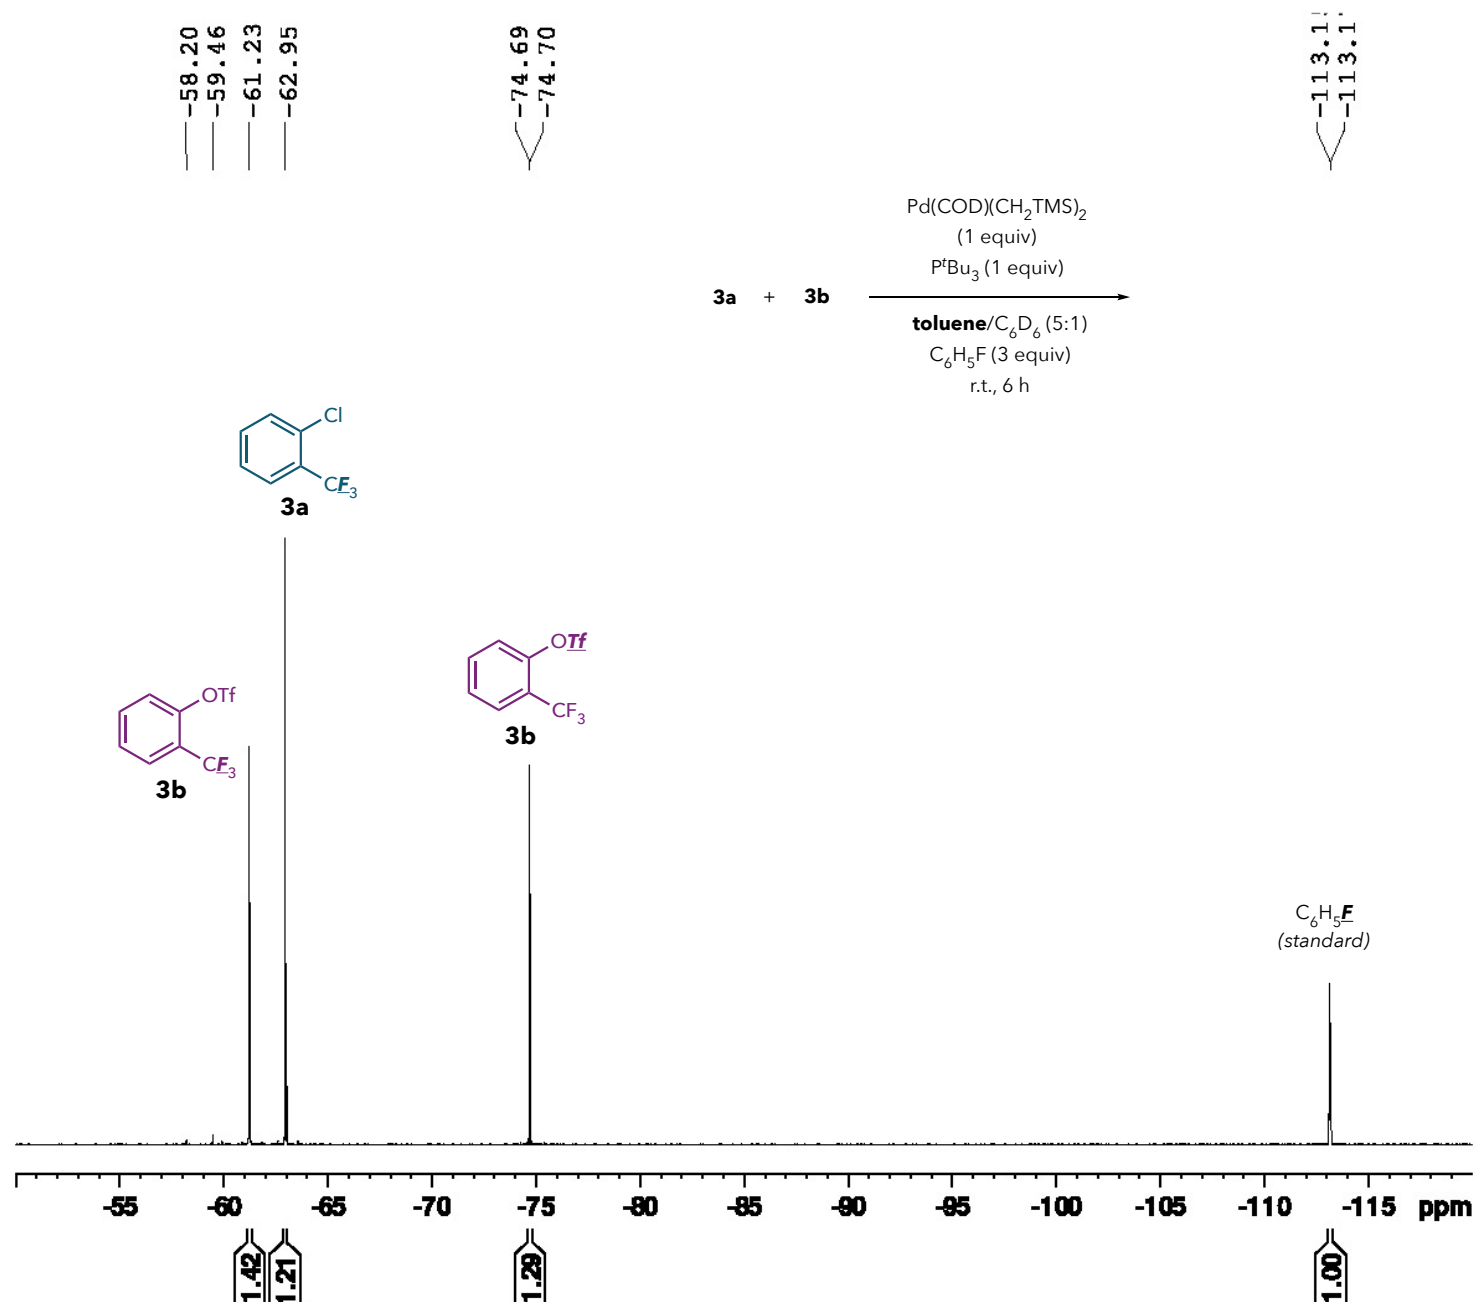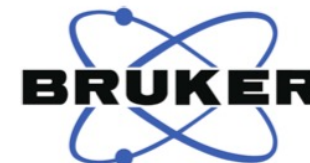

Current Data Parameters  
 NAME ER-6-52-1\_tol  
 EXPNO 2  
 PROCNO 1

F2 - Acquisition Parameter  
 Date\_ 20200618  
 Time 15.39  
 INSTRUM spect  
 PROBHD 5 mm QNP 1H/13  
 PULPROG zgpg30  
 TD 32768  
 SOLVENT C6D6  
 NS 64  
 DS 0  
 SWH 50125.312 Hz  
 FIDRES 1.529703 Hz  
 AQ 0.3268608 sec  
 RG 1290.2  
 DW 9.975 usec  
 DE 6.00 usec  
 TE 683.2 K  
 D1 1.50000000 sec  
 TD0 1

CHANNEL f1  
 NUC1  $^{19}\text{F}$   
 P1 9.00 usec  
 PL1 0 dB  
 SFO1 282.4250465 MHz

F2 - Processing parameters  
 SI 65536  
 SF 282.4421181 MHz  
 WDW EM  
 SSB 0  
 LB 0.30 Hz  
 GB 0  
 PC 1.00

84.77

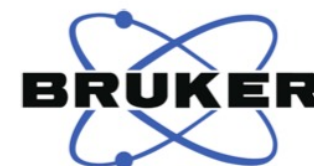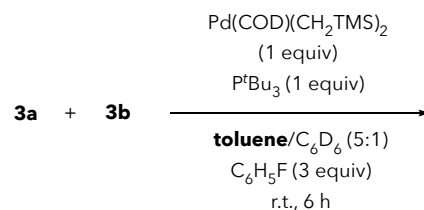

Current Data Parameters  
 NAME ER-6-55-1\_toluene  
 EXPNO 2  
 PROCNO 1

F2 - Acquisition Parameter  
 Date\_ 20200513  
 Time 7.30  
 INSTRUM spect  
 PROBHD 5 mm QNP 1H/13  
 PULPROG zg  
 TD 32768  
 SOLVENT Acetone  
 NS 32  
 DS 0  
 SWH 48661.801 Hz  
 FIDRES 1.485040 Hz  
 AQ 0.3366912 sec  
 RG 14596.5  
 DW 10.275 usec  
 DE 6.00 usec  
 TE 683.2 K  
 D1 2.00000000 sec  
 TD0 1

===== CHANNEL f1 =====  
 NUC1 31P  
 P1 8.00 usec  
 PL1 0 dB  
 SFO1 121.5110430 MHz

F2 - Processing parameters  
 SI 32768  
 SF 121.5110430 MHz  
 WDW EM  
 SSB 0  
 LB 1.00 Hz  
 GB 0  
 PC 1.40

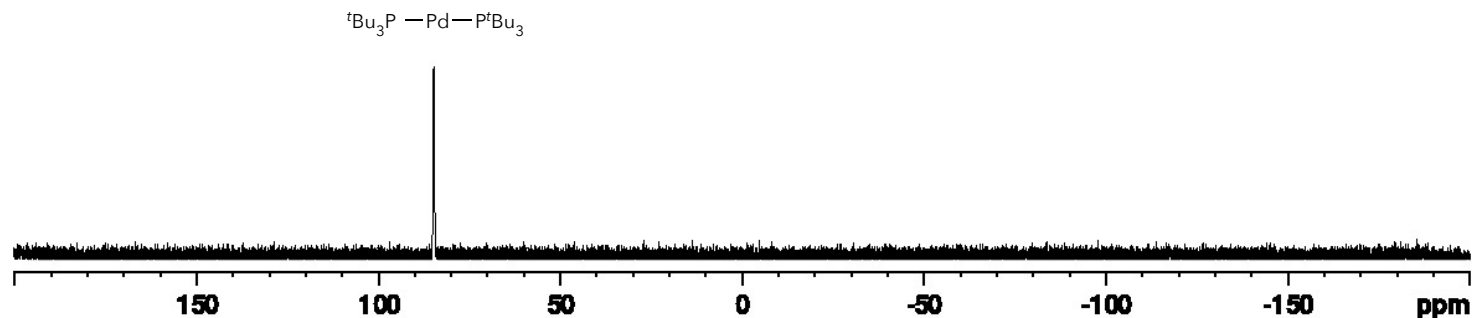

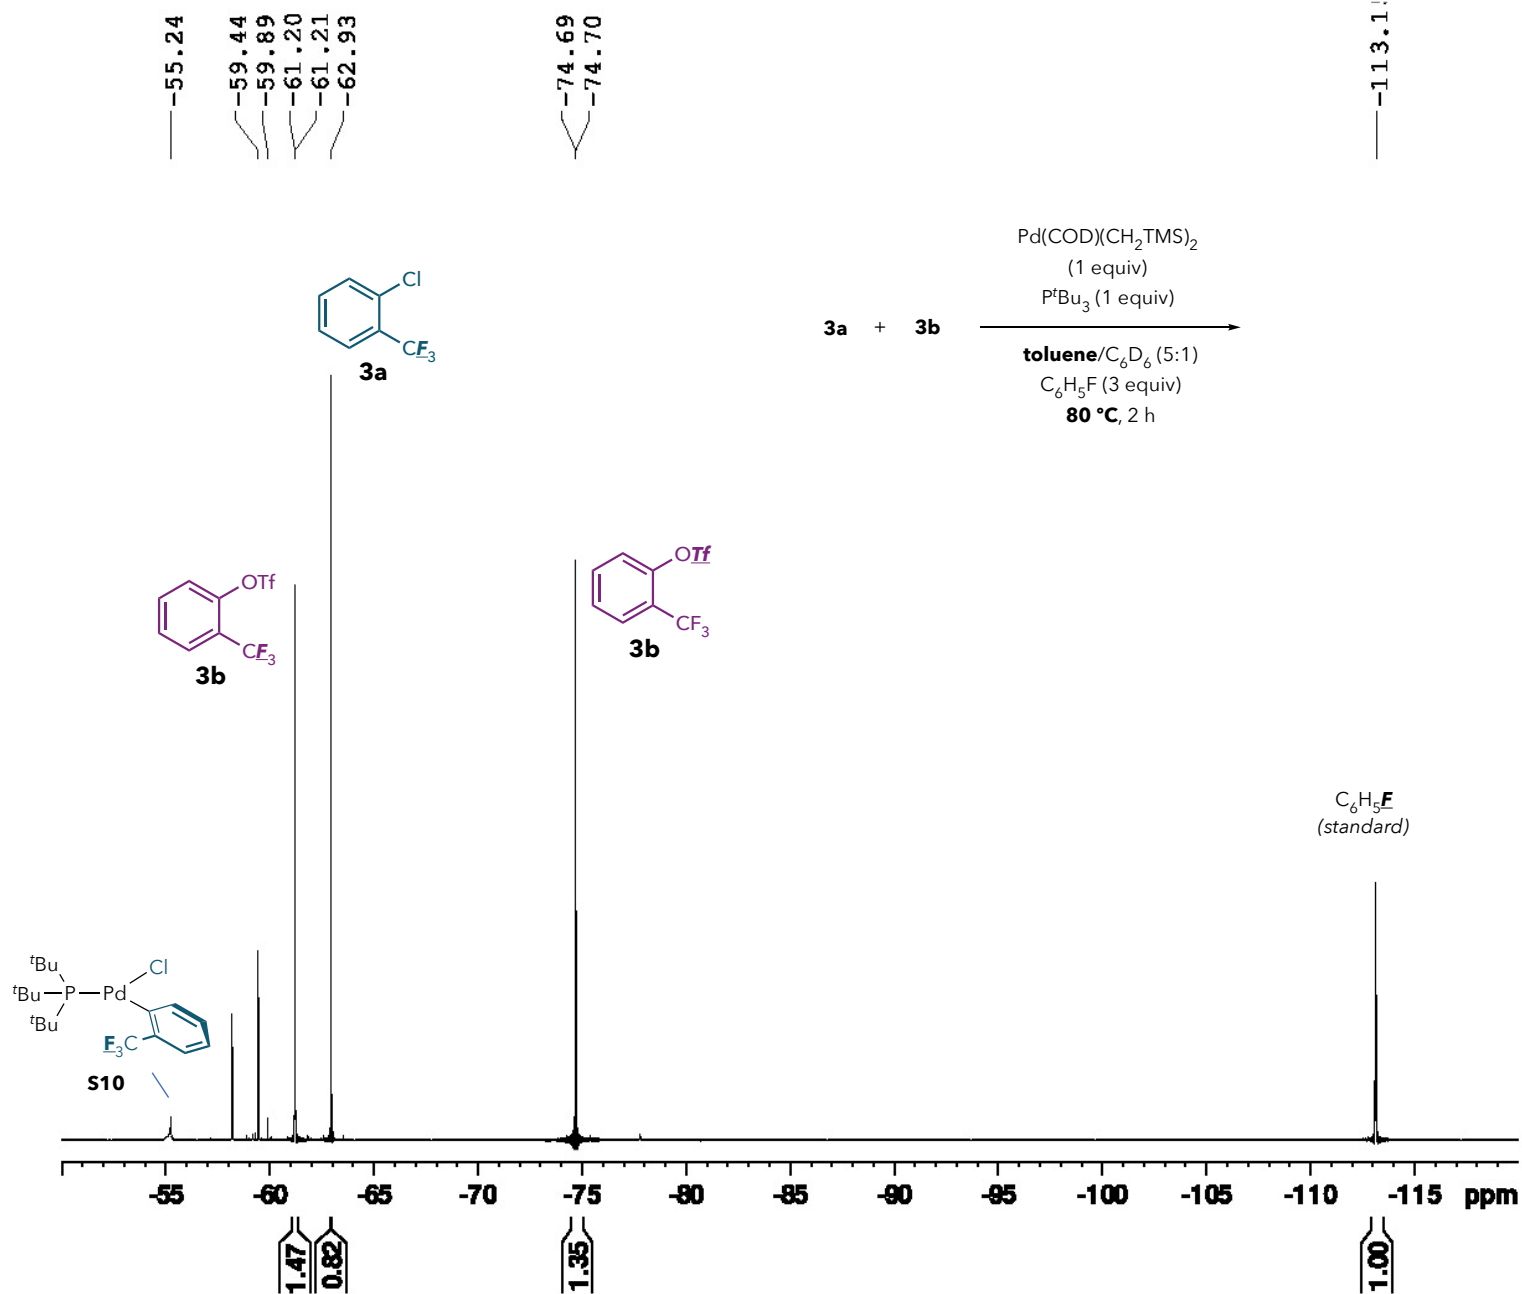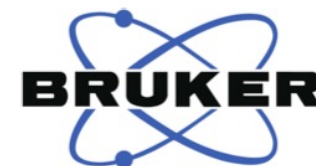

Current Data Parameters  
 NAME ER-6-55-1\_toluene\_80  
 EXPNO 1  
 PROCNO 1

F2 - Acquisition Parameters  
 Date\_ 20200707  
 Time 7.51  
 INSTRUM spect  
 PROBHD 5 mm QNP 1H/13  
 PULPROG zgpg30  
 TD 32768  
 SOLVENT C6D6  
 NS 64  
 DS 0  
 SWH 50125.312 Hz  
 FIDRES 1.529703 Hz  
 AQ 0.3268608 sec  
 RG 1625.5  
 DW 9.975 usec  
 DE 6.00 usec  
 TE 683.2 K  
 D1 1.50000000 sec  
 TD0 1

===== CHANNEL f1 =====  
 NUC1 19F  
 P1 9.00 usec  
 PL1 0 dB  
 SFO1 282.4250465 MHz

F2 - Processing parameters  
 SI 65536  
 SF 282.4421250 MHz  
 WDW EM  
 SSB 0  
 LB 0.30 Hz  
 GB 0  
 PC 1.00

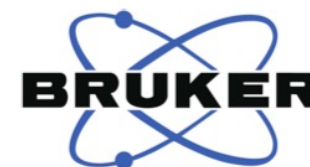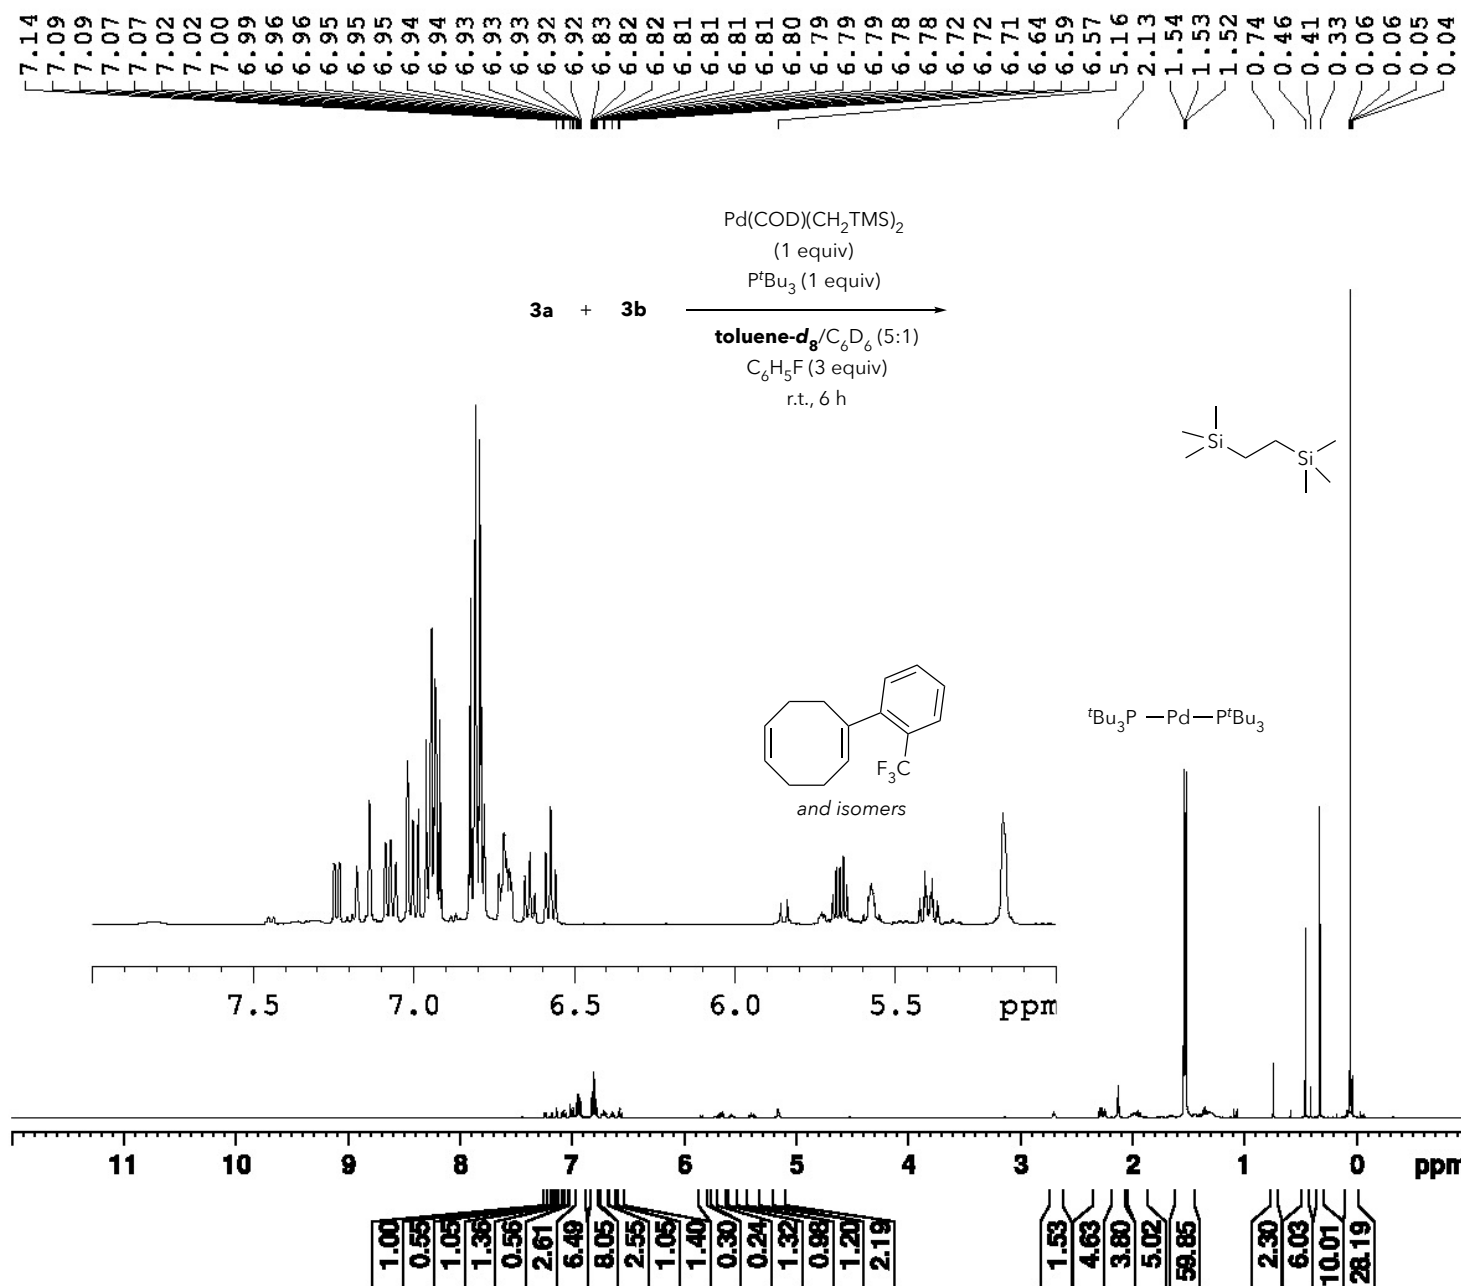

Current Data Parameters  
NAME 6-SMR-41-3  
EXPNO 10  
PROCNO 1

F2 - Acquisition Parameter  
Date\_ 20211116  
Time 15.16 h  
INSTRUM spect  
PROBHD Z125869\_0055 (  
PULPROG zg30  
TD 65536  
SOLVENT Tol  
NS 64  
DS 2  
SWH 10000.000 Hz  
FIDRES 0.305176 Hz  
AQ 3.2767999 sec  
RG 30.54  
DW 50.000 usec  
DE 16.00 usec  
TE 298.0 K  
D1 2.00000000 sec  
TD0 1  
SFO1 500.2330889 MHz  
NUC1 1H  
P0 4.00 usec  
P1 12.00 usec  
PLW1 11.44699955 W

F2 - Processing parameters  
SI 65536  
SF 500.2300000 MHz  
WDW EM  
SSB 0  
LB 0.30 Hz  
GB 0  
PC 1.00

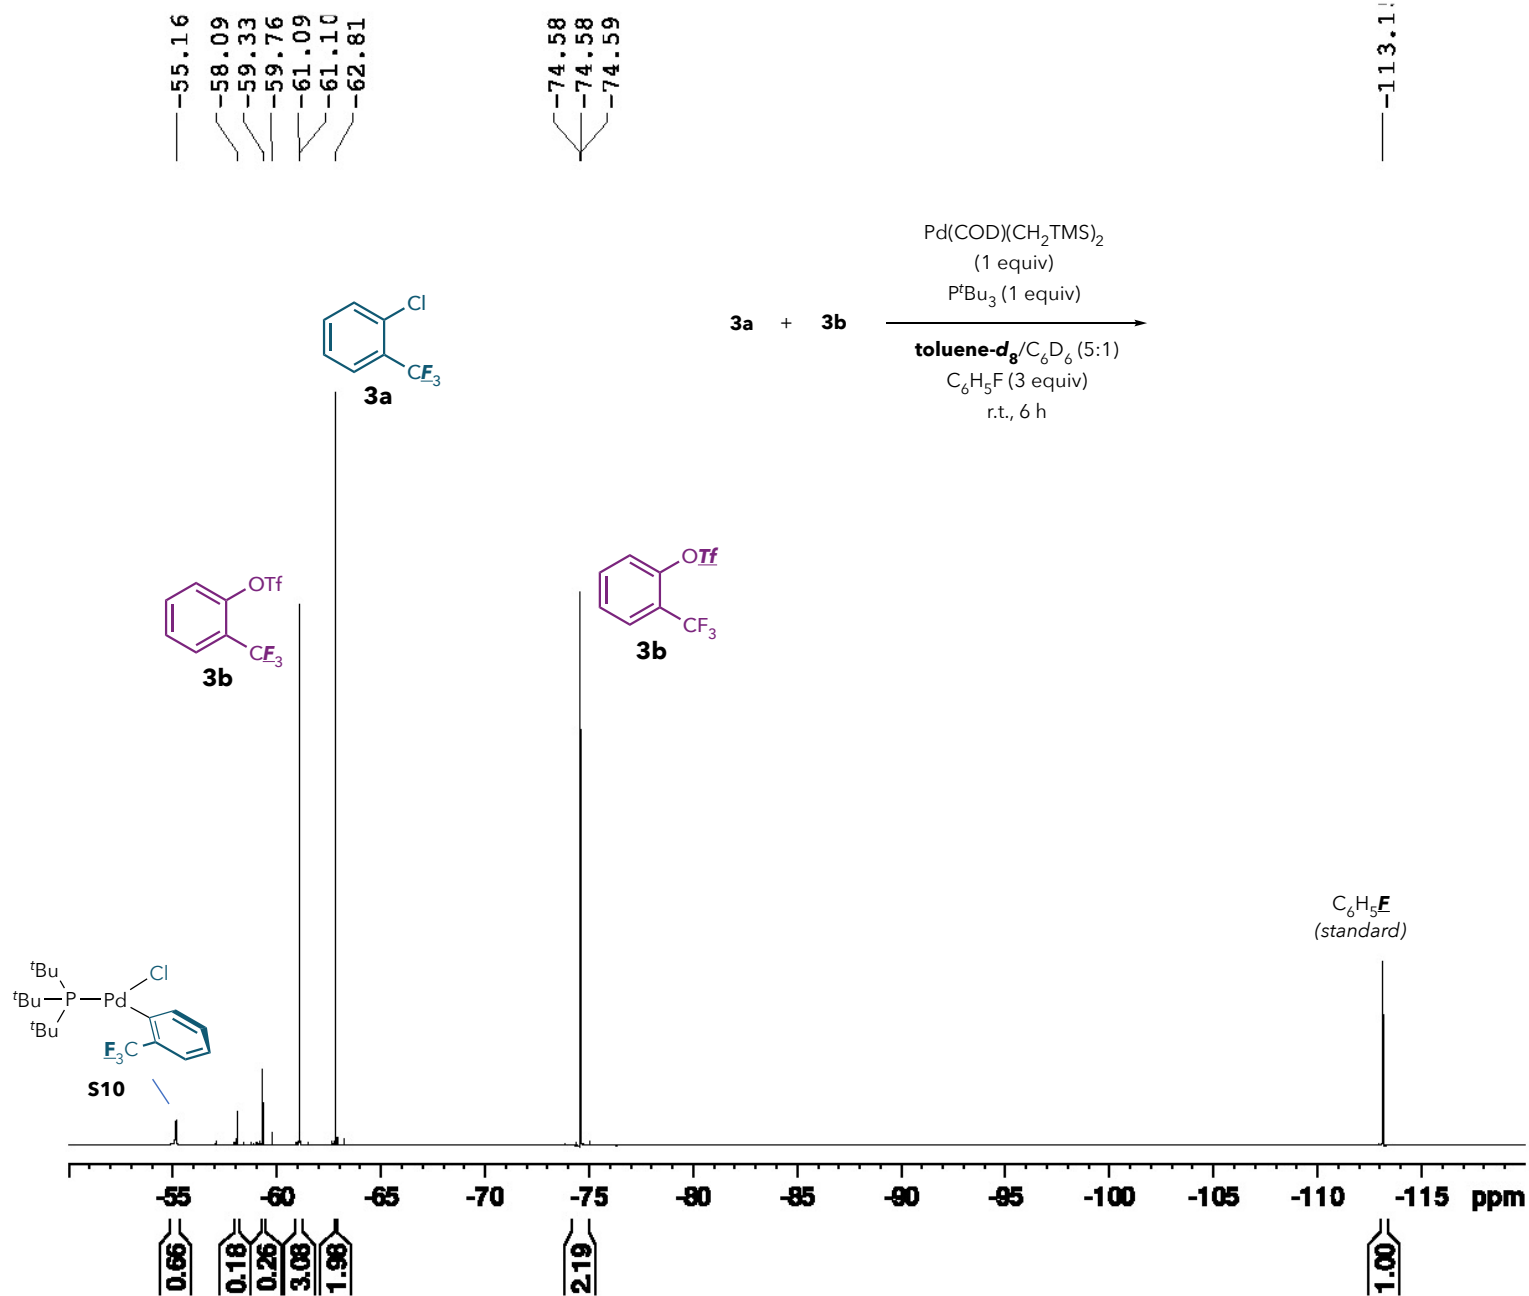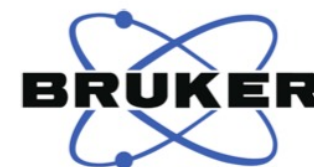

Current Data Parameters  
NAME 6-SMR-41-3  
EXPNO 11  
PROCNO 2

F2 - Acquisition Parameter  
Date\_ 20211116  
Time 15.18 h  
INSTRUM spect  
PROBHD Z125869\_0055 (  
PULPROG zgflgn  
TD 131072  
SOLVENT Tol  
NS 16  
DS 4  
SWH 113636.367 Hz  
FIDRES 1.733953 Hz  
AQ 0.5767168 sec  
RG 15.61  
DW 4.400 usec  
DE 18.00 usec  
TE 298.0 K  
D1 1.00000000 sec  
TD0 1  
SFO1 470.6394024 MHz  
NUC1 19F  
P1 15.00 usec  
PLW1 11.70800018 W

F2 - Processing parameters  
SI 65536  
SF 470.6866398 MHz  
WDW EM  
SSB 0  
LB 0.30 Hz  
GB 0  
PC 1.00

84.92  
81.40  
70.43  
69.15

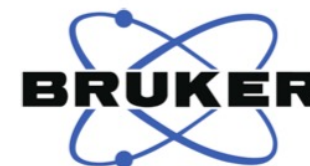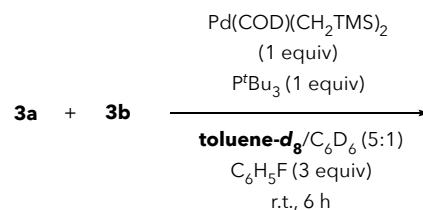

Current Data Parameters  
 NAME 6-SMR-41-3  
 EXPNO 12  
 PROCNO 1

F2 - Acquisition Parameter  
 Date\_ 20211116  
 Time 15.21 h  
 INSTRUM spect  
 PROBHD Z125869\_0055 (  
 PULPROG zgpg30  
 TD 65536  
 SOLVENT Tol  
 NS 16  
 DS 4  
 SWH 81521.742 Hz  
 FIDRES 2.487846 Hz  
 AQ 0.4019541 sec  
 RG 190.44  
 DW 6.133 usec  
 DE 18.00 usec  
 TE 298.0 K  
 D1 2.00000000 sec  
 D11 0.03000000 sec  
 TD0 1  
 SFO1 202.4866909 MHz  
 NUC1 31P  
 P0 4.00 usec  
 P1 12.00 usec  
 PLW1 40.26200104 W  
 SFO2 500.2320009 MHz  
 NUC2 1H  
 CPDPRG[2] waltz16  
 PCPD2 80.00 usec  
 PLW2 11.44699955 W  
 PLW12 0.25756001 W  
 PLW13 0.12955000 W

$t\text{Bu}_3\text{P} - \text{Pd} - \text{P}^t\text{Bu}_3$

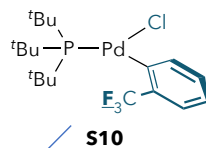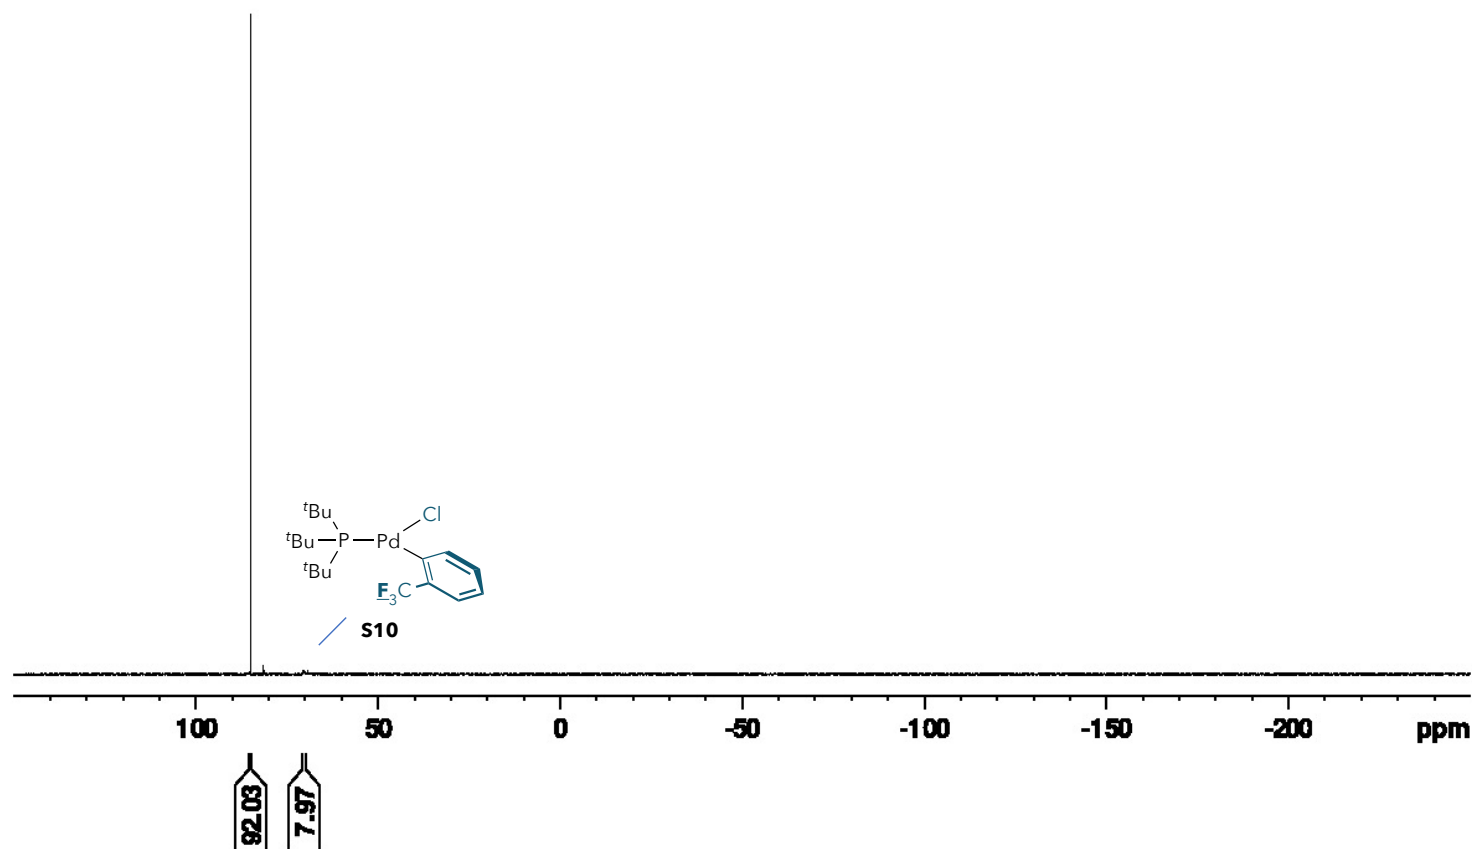

F2 - Processing parameters  
 SI 32768  
 SF 202.4968157 MHz  
 WDW EM  
 SSB 0  
 LB 1.00 Hz  
 GB 0  
 PC 1.40

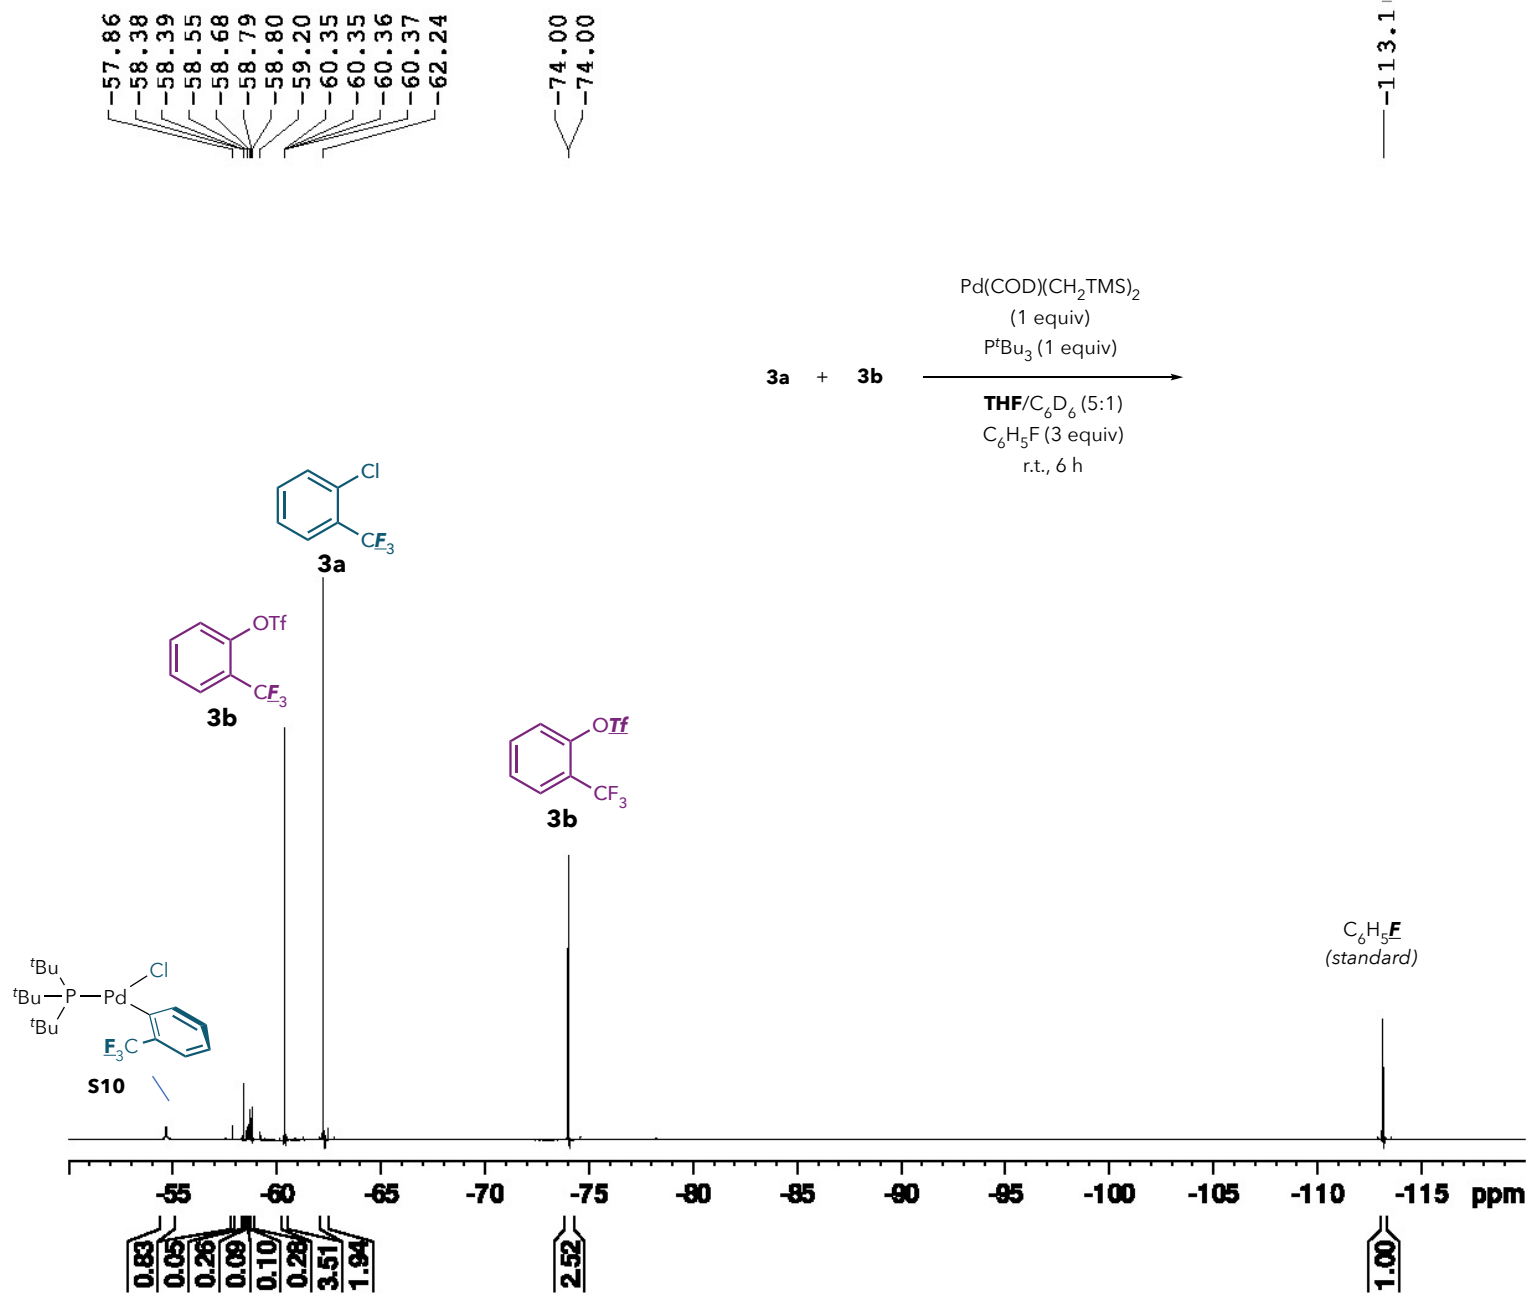

Current Data Parameters  
 NAME 6-SMR-39-3  
 EXPNO 10  
 PROCNO 2

F2 - Acquisition Parameter  
 Date\_ 20211115  
 Time 15.47 h  
 INSTRUM Avance Neo  
 PROBHD Z152088\_0031 (  
 PULPROG zgig  
 TD 131072  
 SOLVENT C6D6  
 NS 16  
 DS 4  
 SWH 90909.094 Hz  
 FIDRES 1.387163 Hz  
 AQ 0.7208960 sec  
 RG 101  
 DW 5.500 usec  
 DE 6.50 usec  
 TE 298.1 K  
 D1 1.00000000 sec  
 D11 0.03000000 sec  
 TD0 1  
 SFO1 376.4607164 MHz  
 NUC1 19F  
 P1 12.00 usec  
 PLW1 31.08900070 W  
 SFO2 400.1316005 MHz  
 NUC2 1H  
 CPDPRG12 waltz16  
 PCPD2 90.00 usec  
 PLW2 24.03499985 W  
 PLW12 0.18990999 W

F2 - Processing parameters  
 SI 65536  
 SF 376.4979704 MHz  
 WDW EM  
 SSB 0  
 LB 0.30 Hz  
 GB 0  
 PC 1.00

85.08  
84.83  
82.15  
81.16  
70.44  
69.51



Current Data Parameters  
NAME 6-SMR-39-3  
EXPNO 11  
PROCNO 1

F2 - Acquisition Parameter  
Date\_ 20211115  
Time 15.50 h  
INSTRUM Avance Neo  
PROBHD Z152088\_0031 (  
PULPROG zgpg30  
TD 65536  
SOLVENT C6D6  
NS 32  
DS 4  
SWH 65789.477 Hz  
FIDRES 2.007735 Hz  
AQ 0.4980736 sec  
RG 101  
DW 7.600 usec  
DE 6.50 usec  
TE 298.0 K  
D1 2.00000000 sec  
D11 0.03000000 sec  
TD0 1  
SFO1 161.9674942 MHz  
NUC1 31P  
P0 2.67 usec  
P1 8.00 usec  
PLW1 45.86100006 W  
SFO2 400.1316005 MHz  
NUC2 1H  
CPDPRG[2] waltz16  
PCPD2 90.00 usec  
PLW2 24.03499985 W  
PLW12 0.18990999 W  
PLW13 0.09552100 W

F2 - Processing parameters  
SI 32768  
SF 161.9755930 MHz  
WDW EM  
SSB 0  
LB 1.00 Hz  
GB 0  
PC 1.40

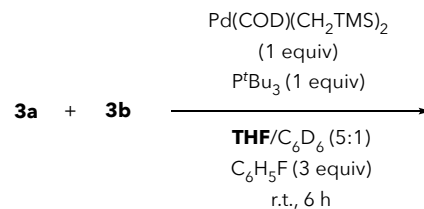

$t\text{Bu}_3\text{P} - \text{Pd} - \text{P}^t\text{Bu}_3$

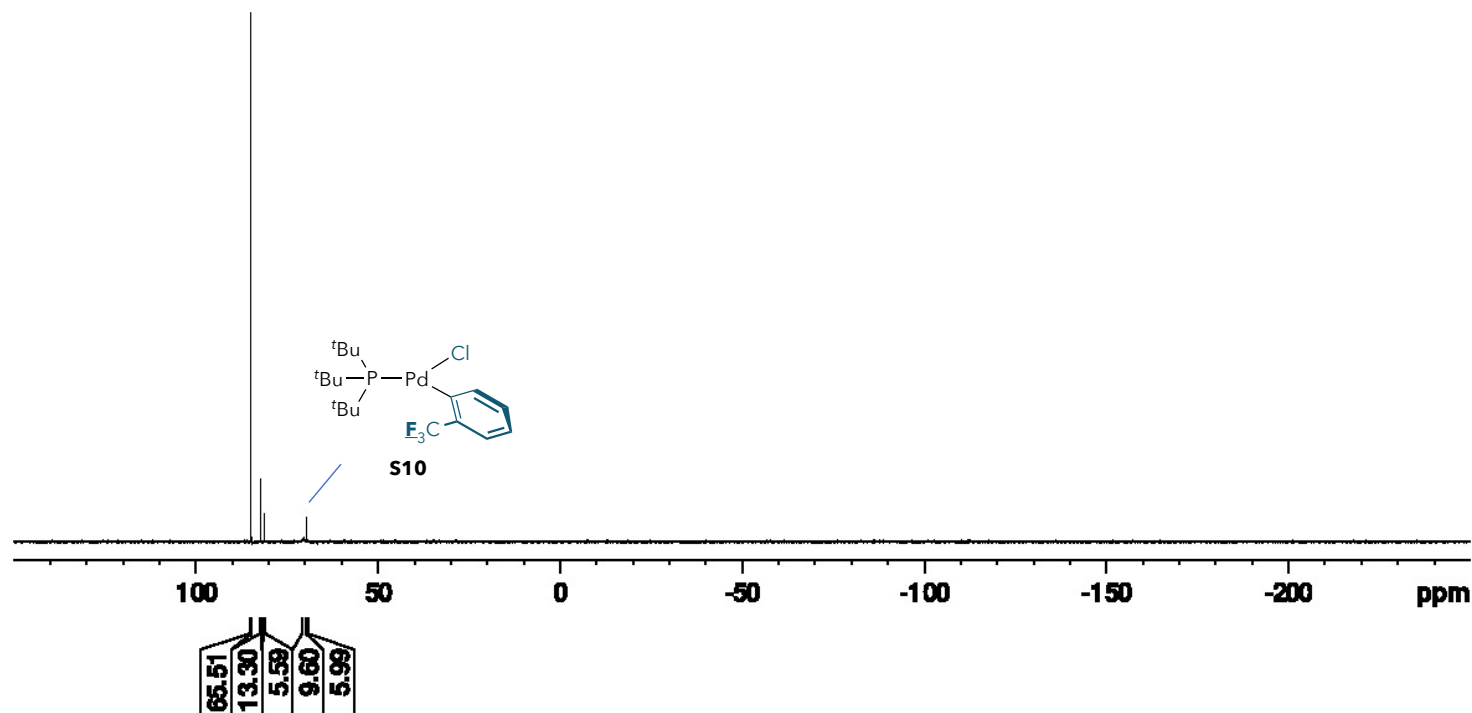

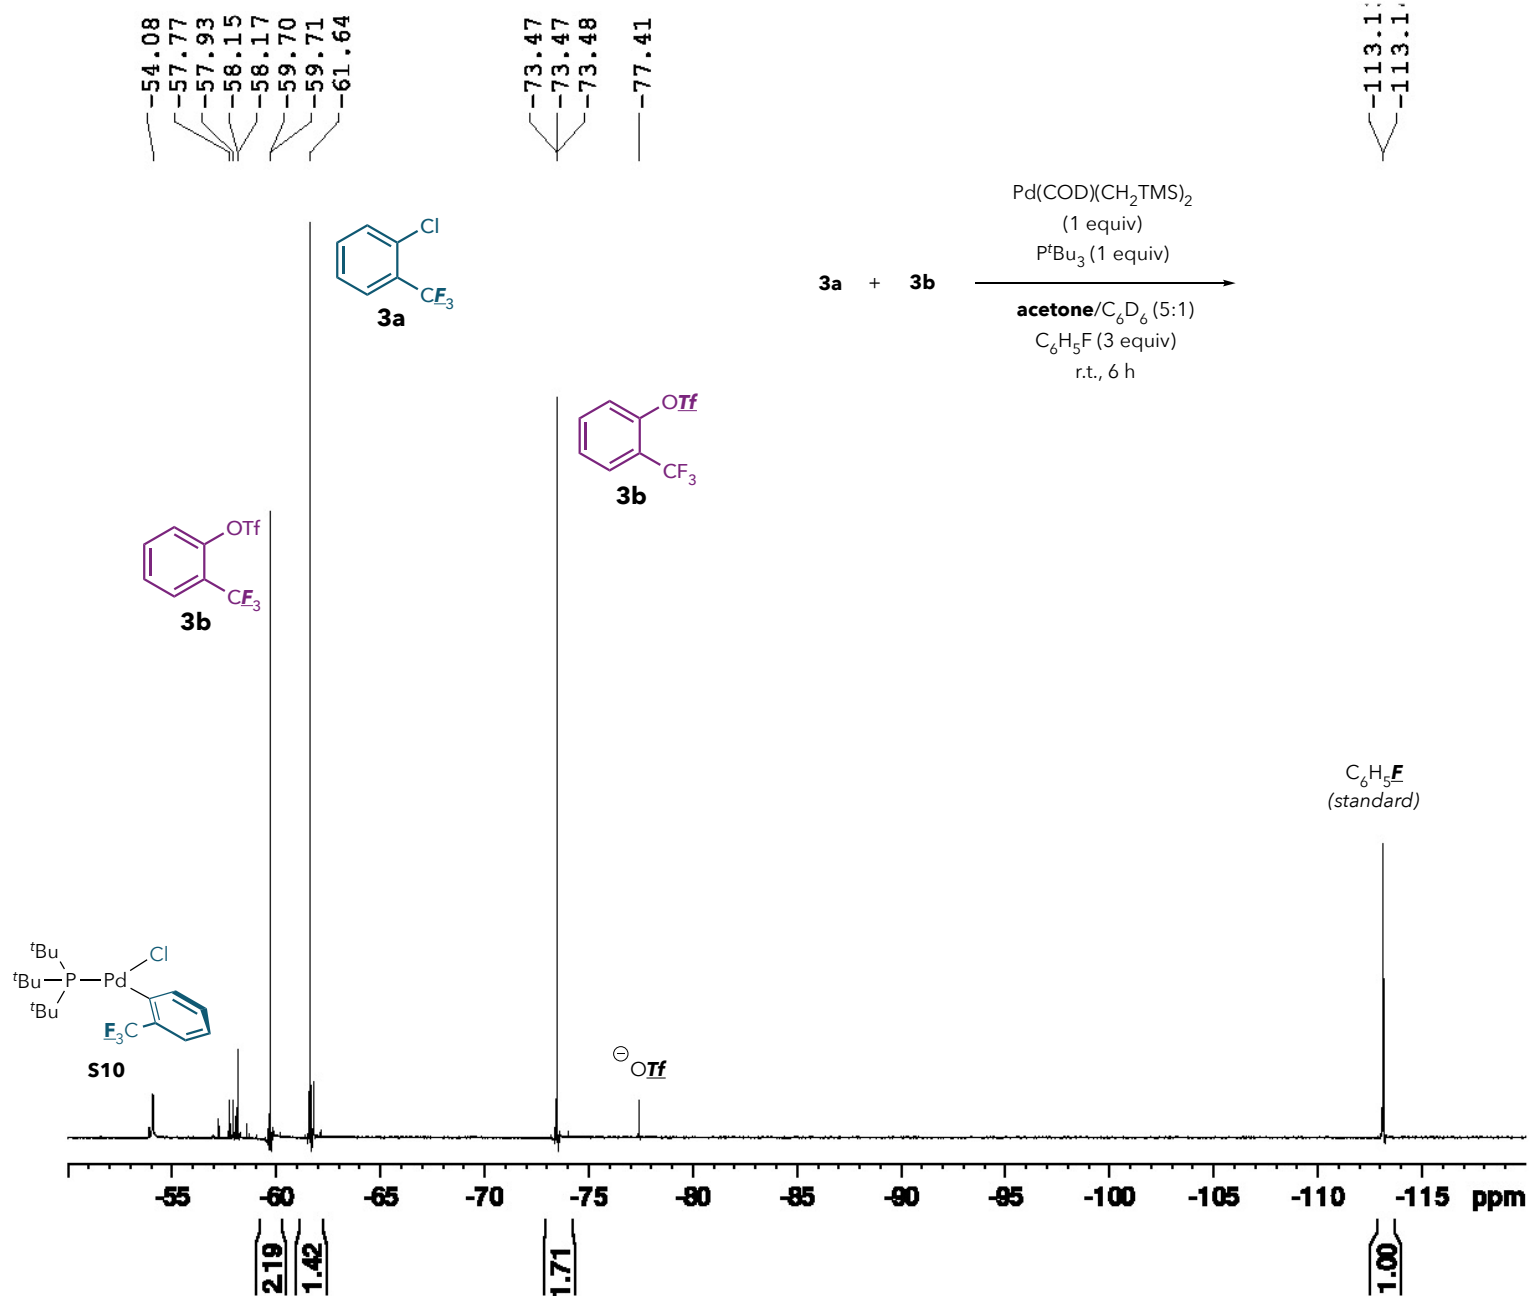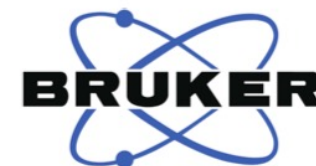

Current Data Parameters  
NAME 6-SMR-5-7  
EXPNO 12  
PROCNO 2

F2 - Acquisition Parameter  
Date\_ 20210911  
Time 22.06 h  
INSTRUM Avance Neo  
PROBHD Z152088\_0031 (  
PULPROG zg  
TD 130892  
SOLVENT C6D6  
NS 16  
DS 4  
SWH 90909.094 Hz  
FIDRES 1.389070 Hz  
AQ 0.7199060 sec  
RG 101  
DW 5.500 usec  
DE 6.50 usec  
TE 298.0 K  
D1 1.00000000 sec  
TD0 1  
SFO1 376.4607164 MHz  
NUC1 19F  
P1 12.00 usec  
PLW1 31.08900070 W

F2 - Processing parameters  
SI 65536  
SF 376.4978043 MHz  
WDW EM  
SSB 0  
LB 0.30 Hz  
GB 0  
PC 1.00

84.77  
81.98  
81.04  
69.95  
54.93

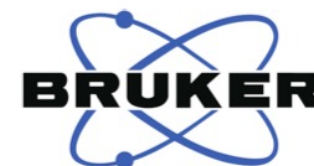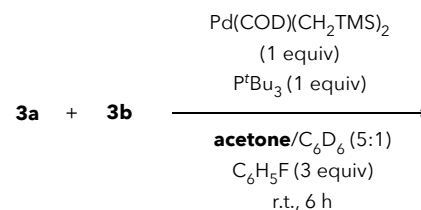

Current Data Parameters  
 NAME 6-SMR-5-7  
 EXPNO 13  
 PROCNO 2

F2 - Acquisition Parameter  
 Date\_ 20210911  
 Time 22.10 h  
 INSTRUM Avance Neo  
 PROBHD Z152088\_0031 (  
 PULPROG zgpg30  
 TD 65536  
 SOLVENT C6D6  
 NS 32  
 DS 4  
 SWH 65789.477 Hz  
 FIDRES 2.007735 Hz  
 AQ 0.4980736 sec  
 RG 101  
 DW 7.600 usec  
 DE 6.50 usec  
 TE 298.0 K  
 D1 2.00000000 sec  
 D11 0.03000000 sec  
 TD0 1  
 SFO1 161.9674942 MHz  
 NUC1 31P  
 P0 2.67 usec  
 P1 8.00 usec  
 PLW1 45.86100006 W  
 SFO2 400.1316005 MHz  
 NUC2 1H  
 CPDPRG[2] waltz16  
 PCPD2 90.00 usec  
 PLW2 24.03499985 W  
 PLW12 0.18990999 W  
 PLW13 0.09552100 W

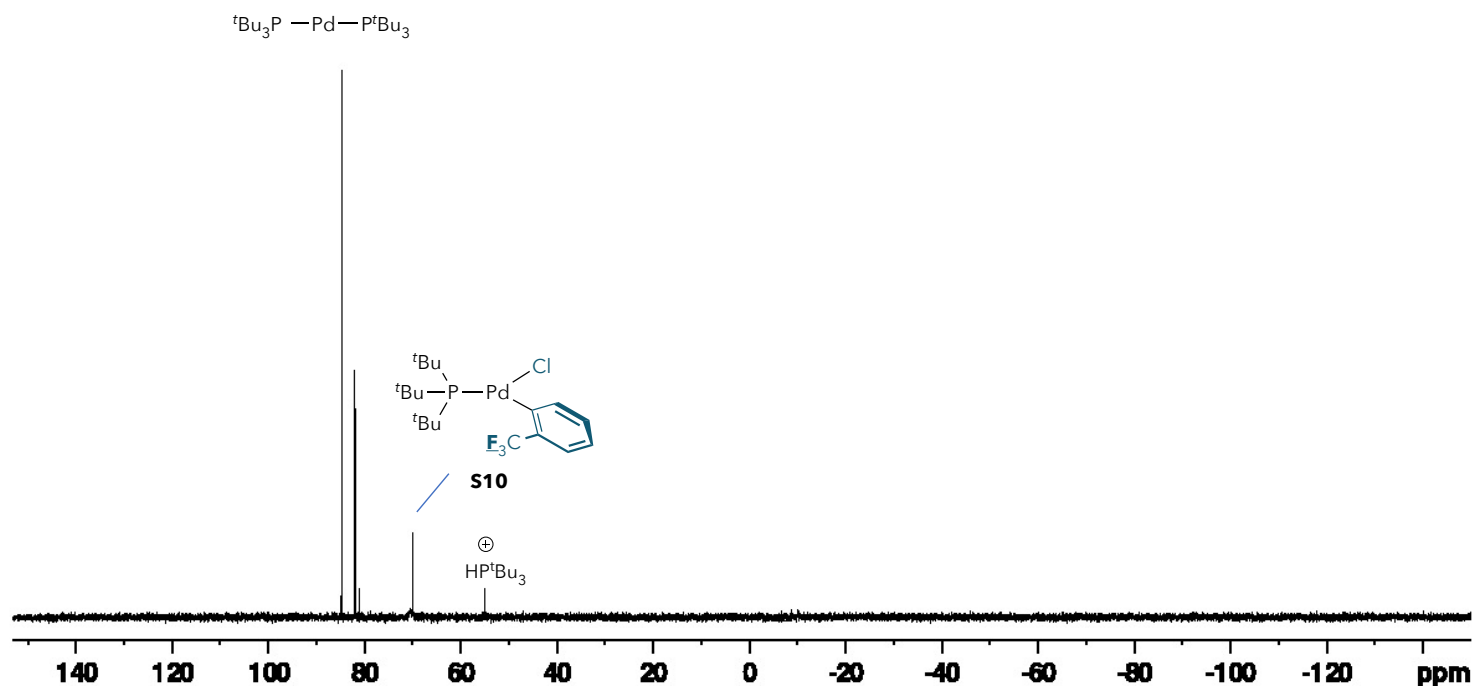

F2 - Processing parameters  
 SI 32768  
 SF 161.9755930 MHz  
 WDW EM  
 SSB 0  
 LB 1.00 Hz  
 GB 0  
 PC 1.40

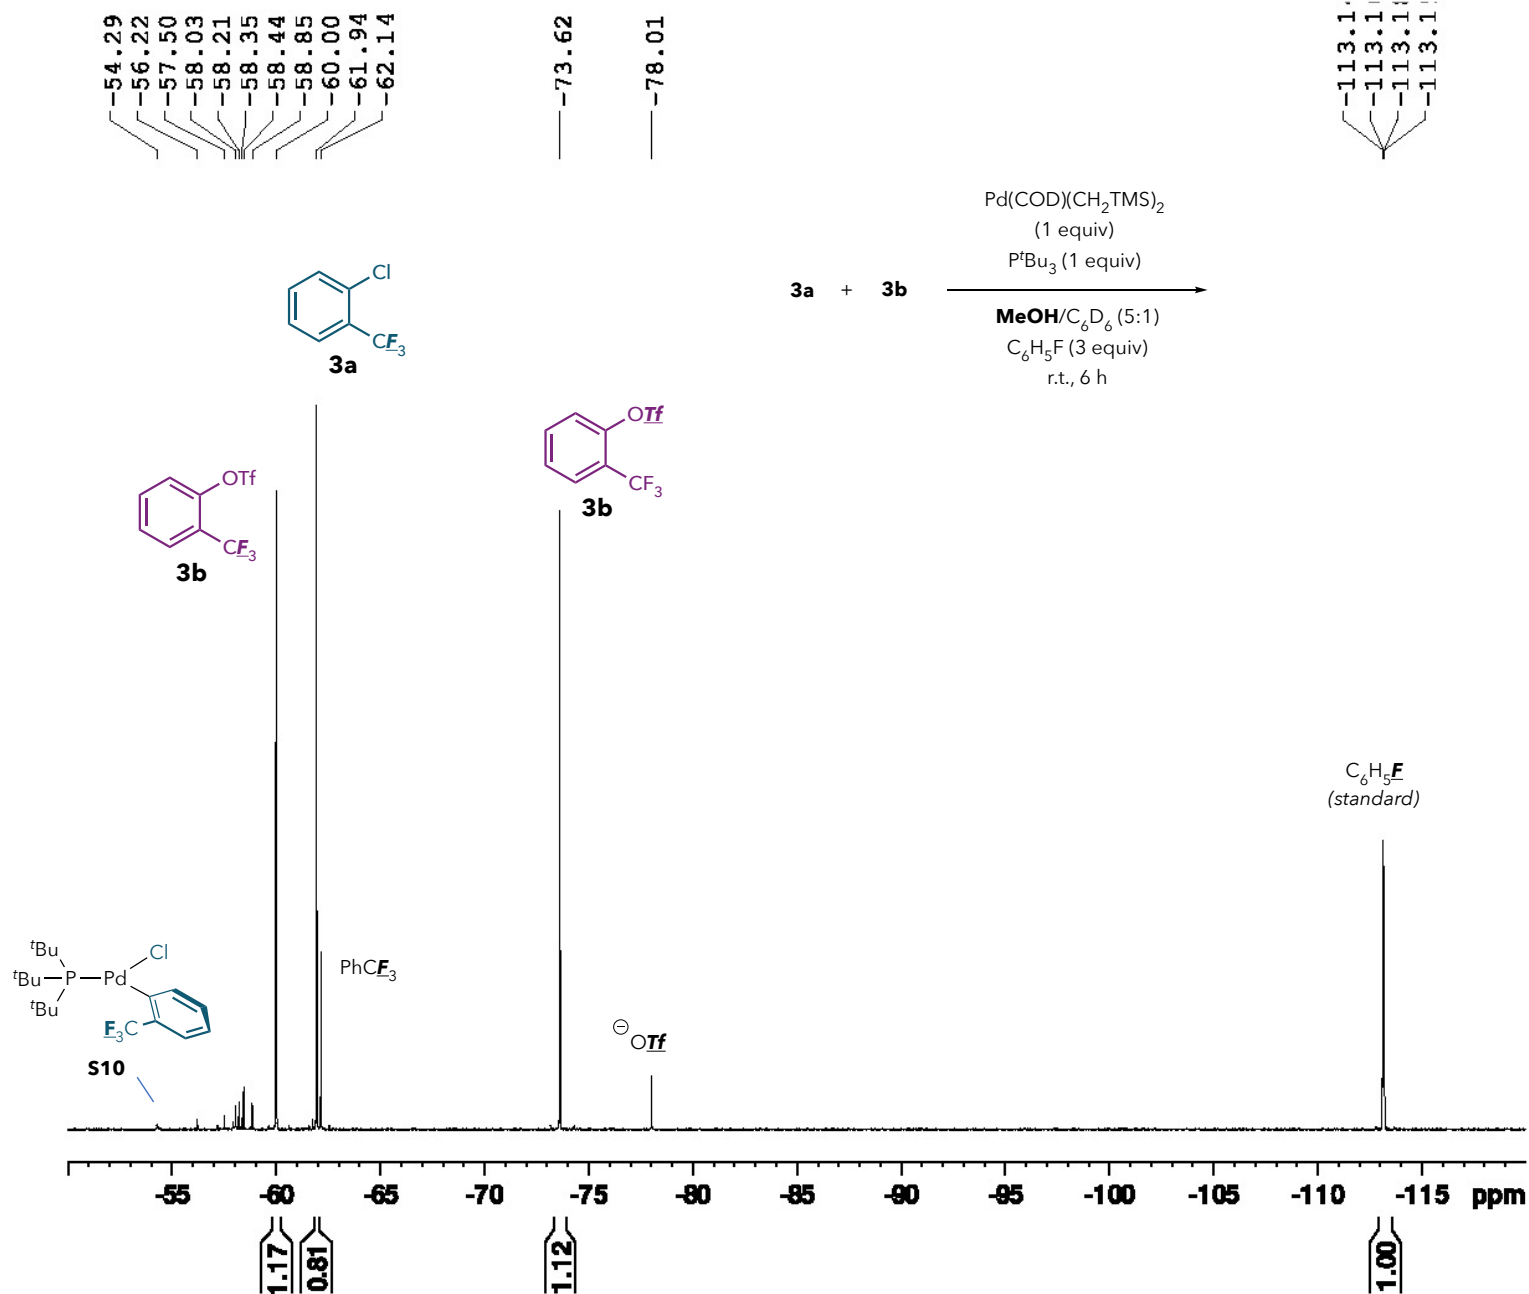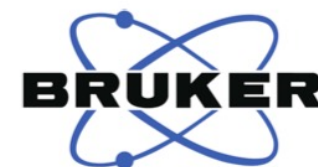

Current Data Parameters  
NAME ER-6-52-2\_MeOH\_new  
EXPNO 1  
PROCNO 1

F2 - Acquisition Parameter  
Date\_ 20200618  
Time 15.46  
INSTRUM spect  
PROBHD 5 mm QNP 1H/13  
PULPROG zgfglqn  
TD 32768  
SOLVENT C6D6  
NS 64  
DS 0  
SWH 50125.312 Hz  
FIDRES 1.529703 Hz  
AQ 0.3268608 sec  
RG 2580.3  
DW 9.975 usec  
DE 6.00 usec  
TE 683.2 K  
D1 1.50000000 sec  
TD0 1

===== CHANNEL f1 =====  
NUC1 19F  
P1 9.00 usec  
PL1 0 dB  
SFO1 282.4250465 MHz

F2 - Processing parameters  
SI 65536  
SF 282.4414859 MHz  
WDW EM  
SSB 0  
LB 0.30 Hz  
GB 0  
PC 1.00

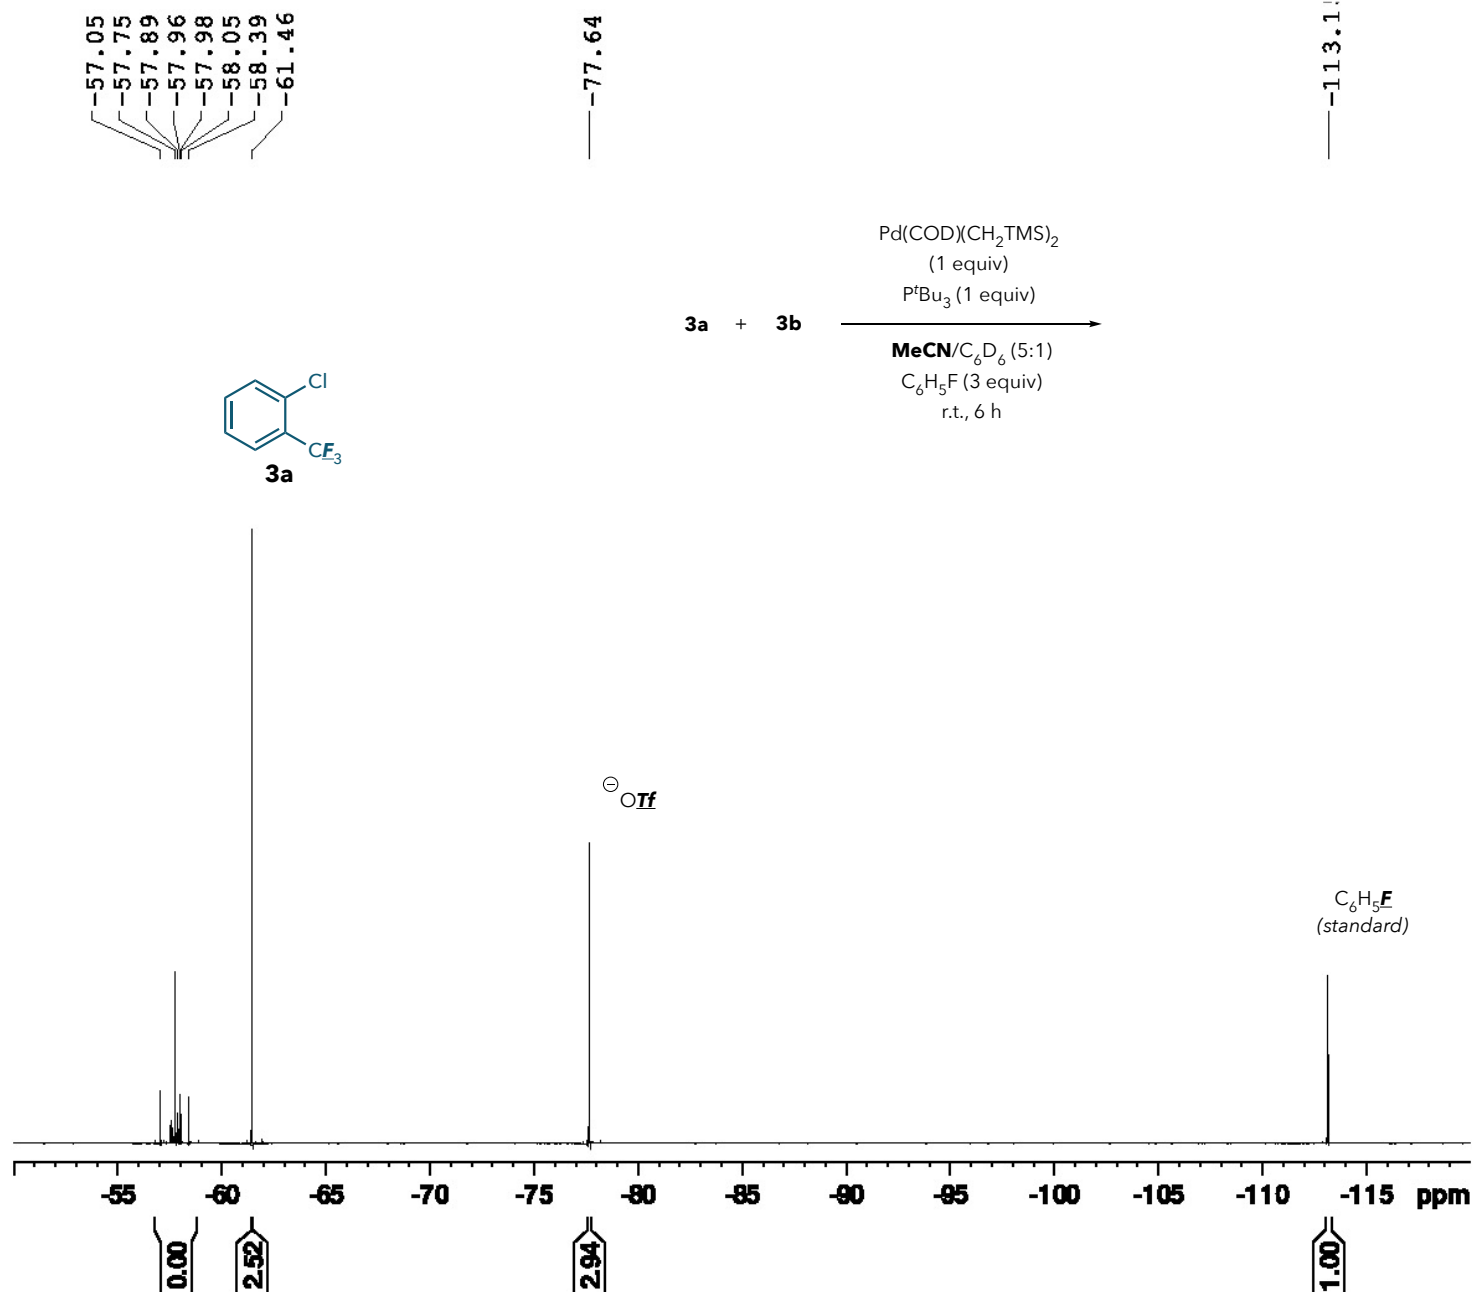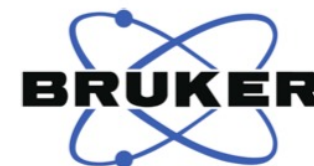

Current Data Parameters  
NAME 6-SMR-39-7  
EXPNO 10  
PROCNO 2

F2 - Acquisition Parameter  
Date\_ 20211115  
Time 16.20 h  
INSTRUM Avance Neo  
PROBHD Z152088\_0031 (  
PULPROG zgig  
TD 131072  
SOLVENT C6D6  
NS 16  
DS 4  
SWH 90909.094 Hz  
FIDRES 1.387163 Hz  
AQ 0.7208960 sec  
RG 101  
DW 5.500 usec  
DE 6.50 usec  
TE 298.1 K  
D1 1.00000000 sec  
D11 0.03000000 sec  
TD0 1  
SFO1 376.4607164 MHz  
NUC1 19F  
P1 12.00 usec  
PLW1 31.08900070 W  
SFO2 400.1316005 MHz  
NUC2 1H  
CPDPRG[2] waltz16  
PCPD2 90.00 usec  
PLW2 24.03499985 W  
PLW12 0.18990999 W

F2 - Processing parameters  
SI 65536  
SF 376.4977327 MHz  
WDW EM  
SSB 0  
LB 0.30 Hz  
GB 0  
PC 1.00

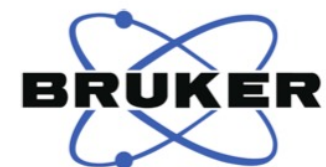

Current Data Parameters  
 NAME 6-SMR-39-7  
 EXPNO 11  
 PROCNO 1

F2 - Acquisition Parameter  
 Date\_ 20211115  
 Time 16.23 h  
 INSTRUM Avance Neo  
 PROBHD Z152088\_0031 (  
 PULPROG zgpg30  
 TD 65536  
 SOLVENT C6D6  
 NS 32  
 DS 4  
 SWH 65789.477 Hz  
 FIDRES 2.007735 Hz  
 AQ 0.4980736 sec  
 RG 101  
 DW 7.600 usec  
 DE 6.50 usec  
 TE 298.0 K  
 D1 2.00000000 sec  
 D11 0.03000000 sec  
 TD0 1  
 SFO1 161.9674942 MHz  
 NUC1 31P  
 P0 2.67 usec  
 P1 8.00 usec  
 PLW1 45.86100006 W  
 SFO2 400.1316005 MHz  
 NUC2 1H  
 CPDPRG[2] waltz16  
 PCPD2 90.00 usec  
 PLW2 24.03499985 W  
 PLW12 0.18990999 W  
 PLW13 0.09552100 W

F2 - Processing parameters  
 SI 32768  
 SF 161.9755930 MHz  
 WDW EM  
 SSB 0  
 LB 1.00 Hz  
 GB 0  
 PC 1.40

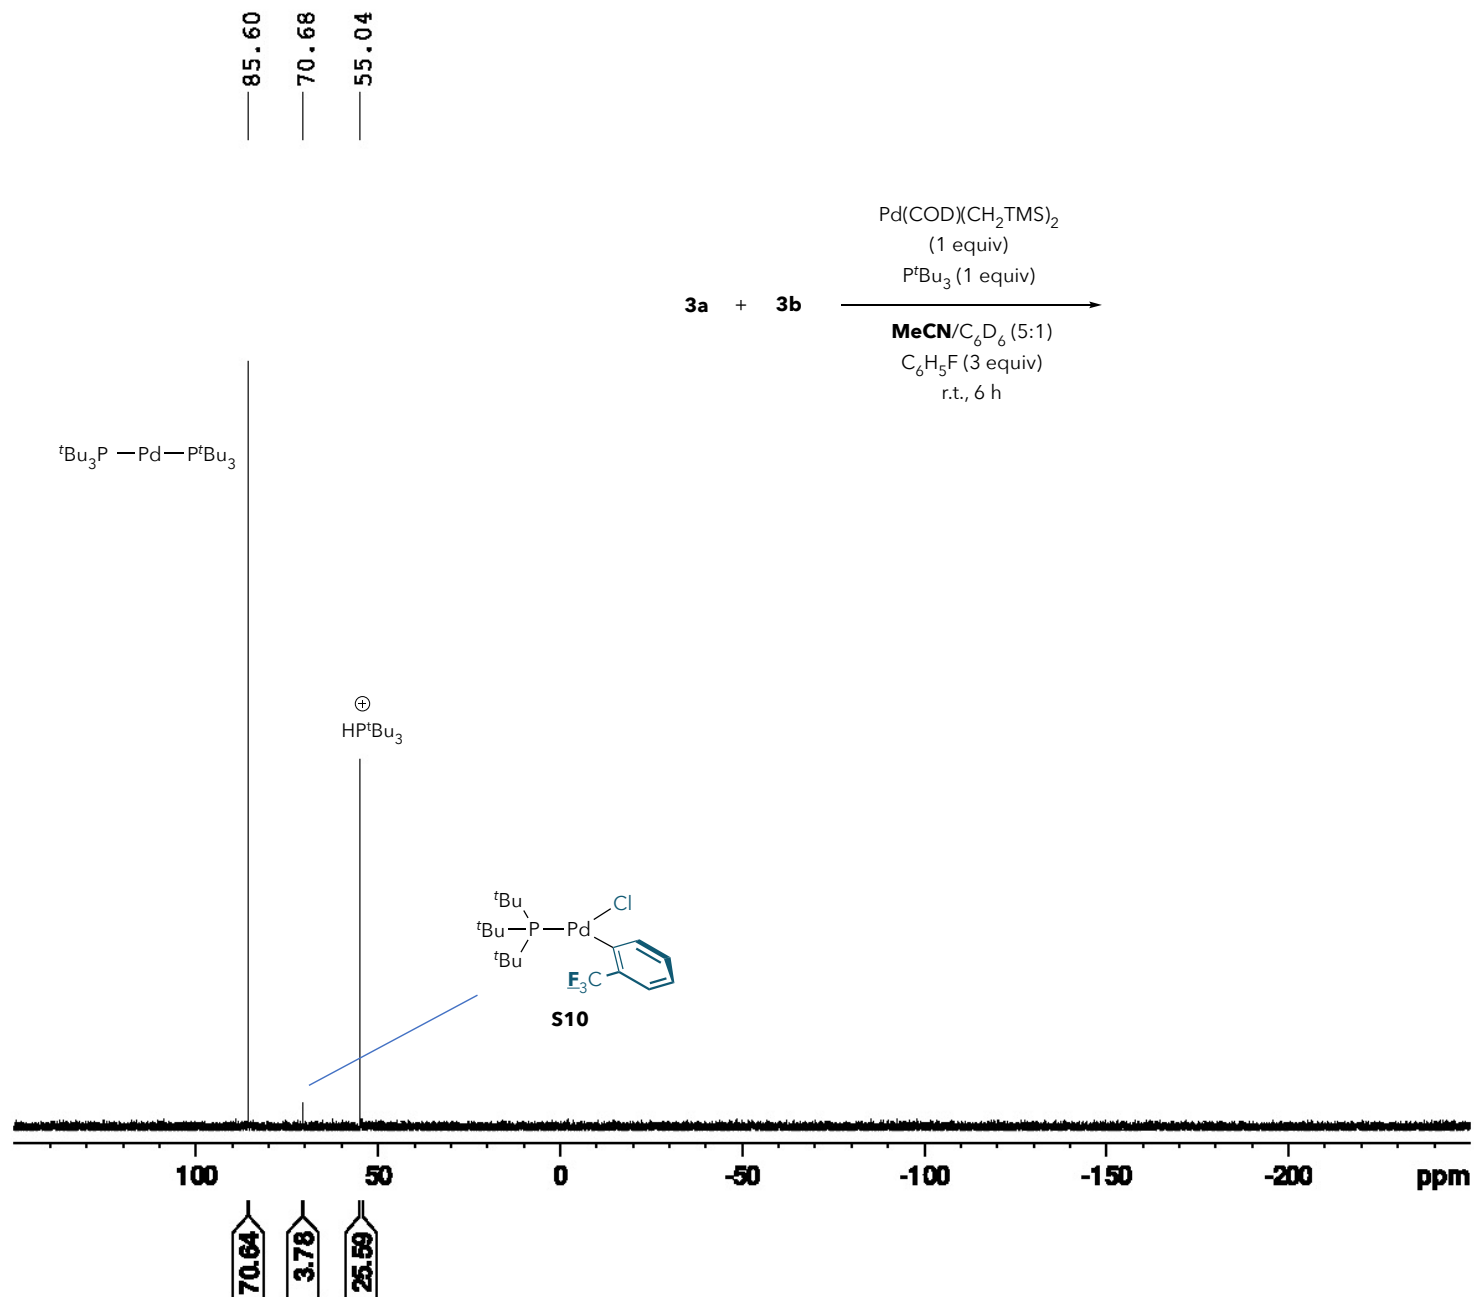

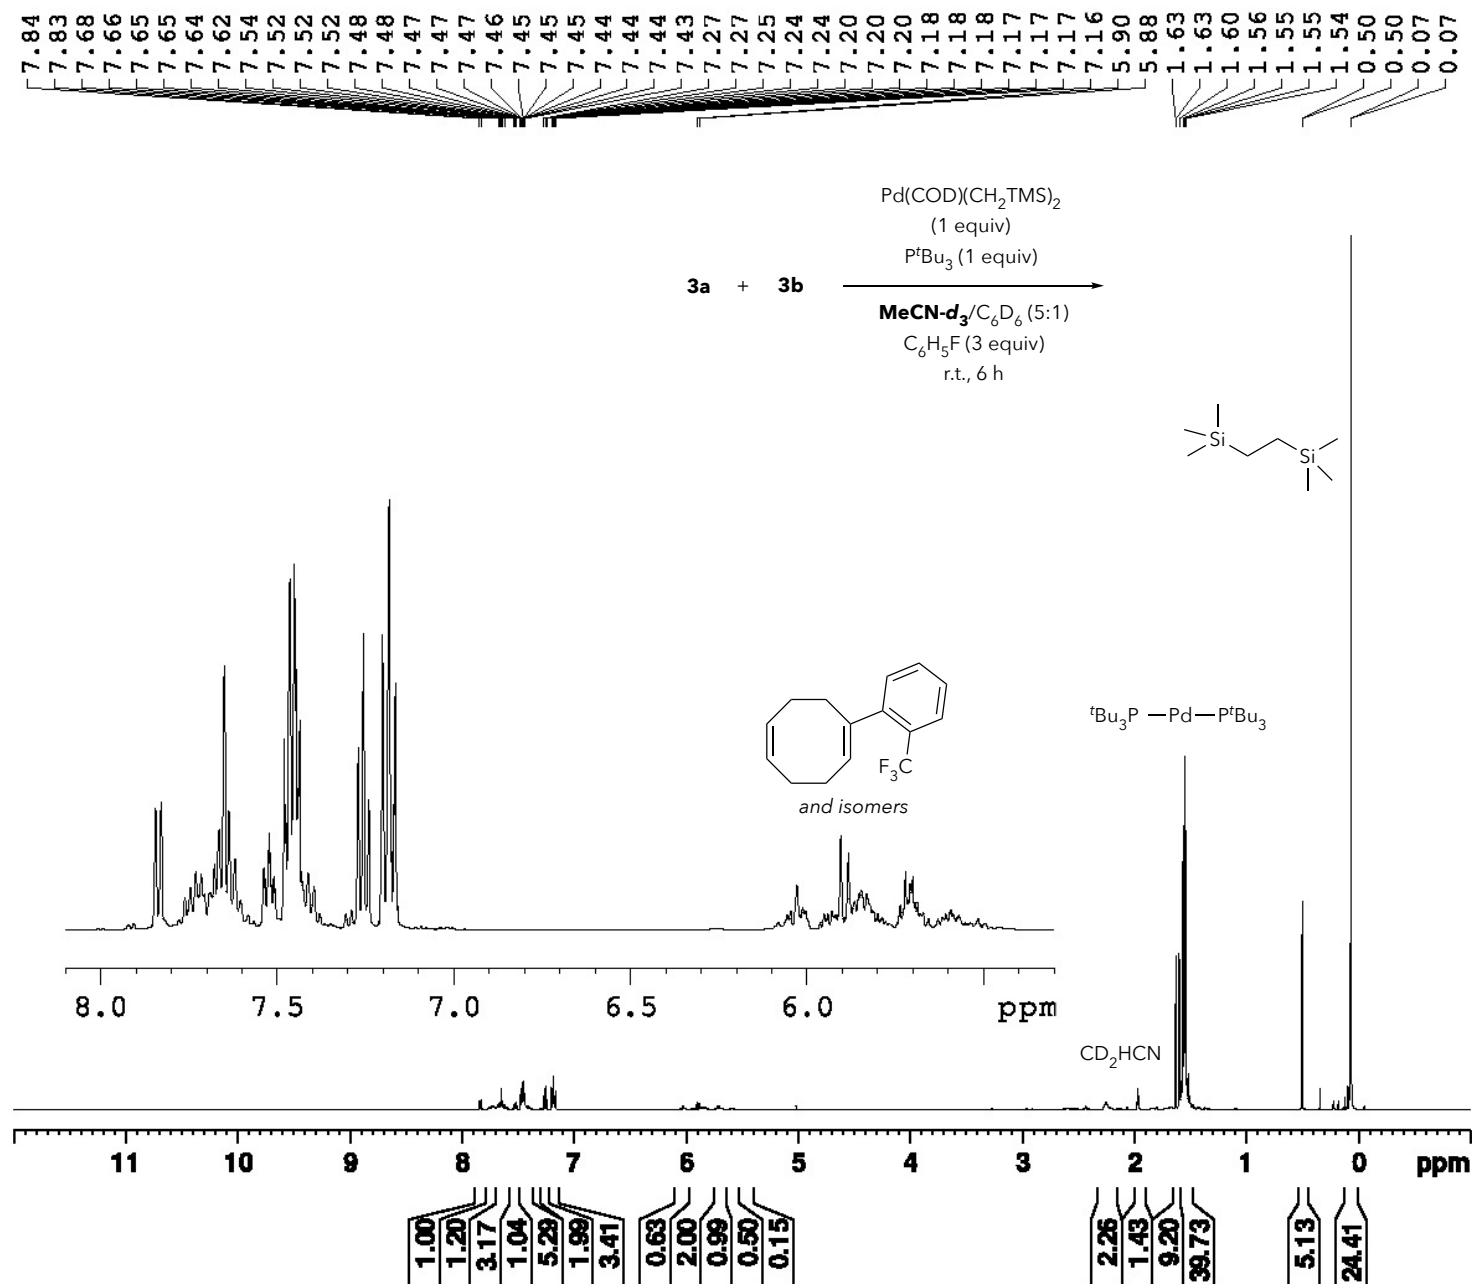

Current Data Parameters  
 NAME 6-SMR-41-6  
 EXPNO 10  
 PROCNO 1

F2 - Acquisition Parameter  
 Date\_ 20211116  
 Time 15.46 h  
 INSTRUM spect  
 PROBHD Z125869\_0055 (  
 PULPROG zg30  
 TD 65536  
 SOLVENT CD3CN  
 NS 64  
 DS 2  
 SWH 10000.000 Hz  
 FIDRES 0.305176 Hz  
 AQ 3.2767999 sec  
 RG 35.18  
 DW 50.000 usec  
 DE 16.00 usec  
 TE 298.0 K  
 D1 2.00000000 sec  
 TD0 1  
 SFO1 500.2330889 MHz  
 NUC1 1H  
 P0 4.00 usec  
 P1 12.00 usec  
 PLW1 11.44699955 W

F2 - Processing parameters  
 SI 65536  
 SF 500.2300000 MHz  
 WDW EM  
 SSB 0  
 LB 0.30 Hz  
 GB 0  
 PC 1.00

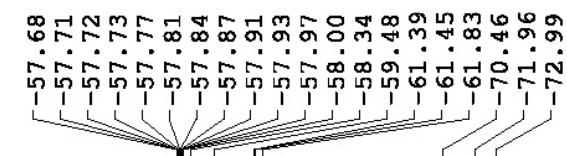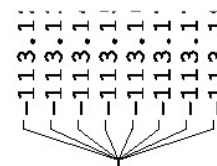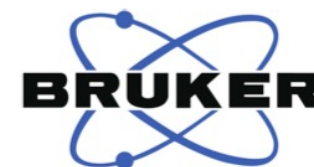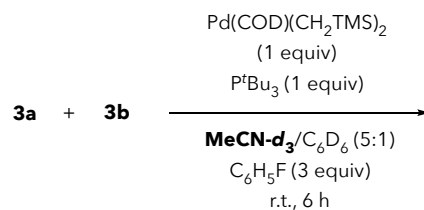

Current Data Parameters  
 NAME 6-SMR-41-6  
 EXPNO 11  
 PROCNO 2

F2 - Acquisition Parameter  
 Date\_ 20211116  
 Time 15.48 h  
 INSTRUM spect  
 PROBHD Z125869\_0055 (  
 PULPROG zgfglqn  
 TD 131072  
 SOLVENT CD3CN  
 NS 16  
 DS 4  
 SWH 113636.367 Hz  
 FIDRES 1.733953 Hz  
 AQ 0.5767168 sec  
 RG 15.61  
 DW 4.400 usec  
 DE 18.00 usec  
 TE 298.0 K  
 D1 1.00000000 sec  
 TD0 1  
 SFO1 470.6394024 MHz  
 NUC1 19F  
 P1 15.00 usec  
 PLW1 11.70800018 W

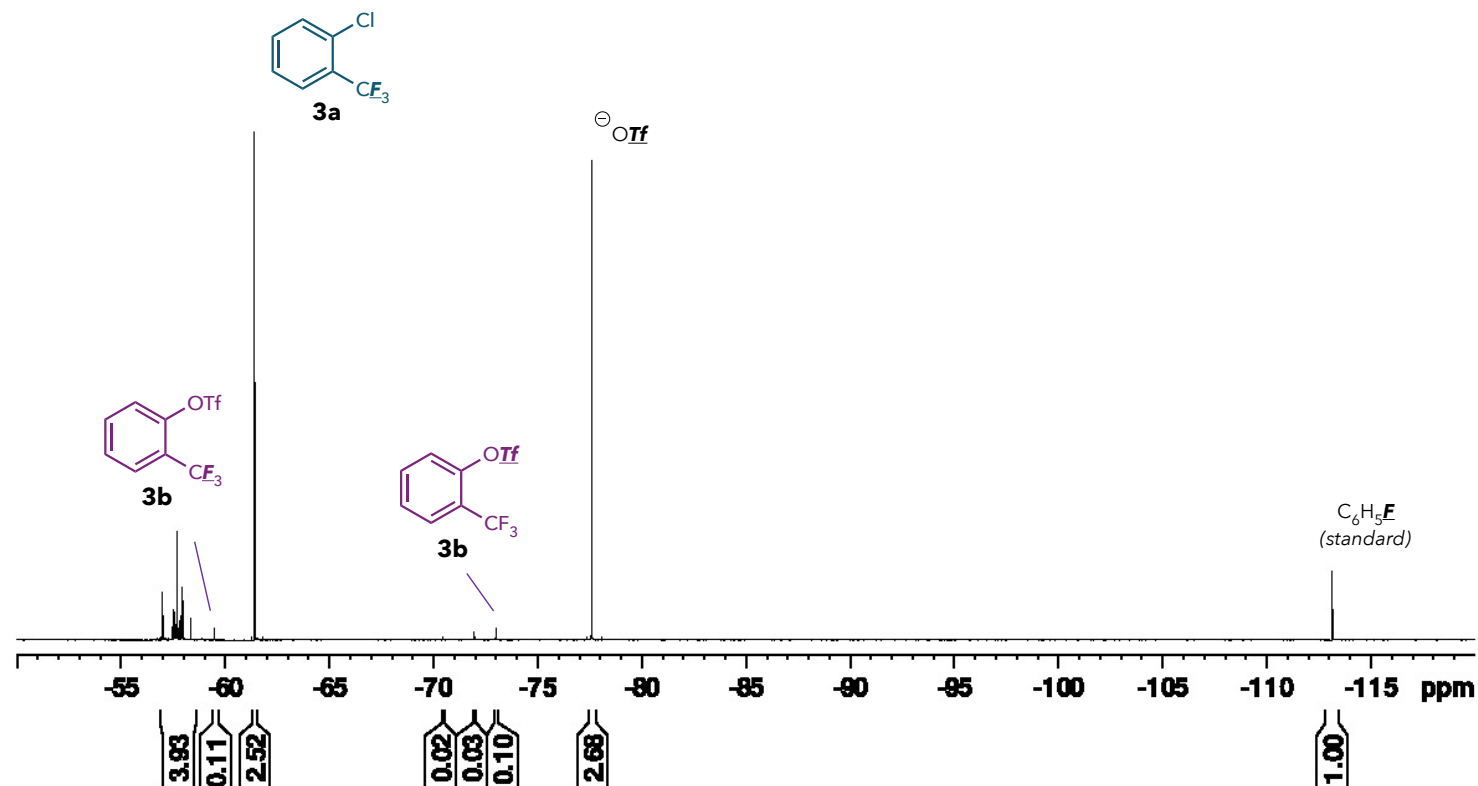

F2 - Processing parameters  
 SI 65536  
 SF 470.6857814 MHz  
 WDW EM  
 SSB 0  
 LB 0.30 Hz  
 GB 0  
 PC 1.00



Current Data Parameters  
 NAME 6-SMR-41-6  
 EXPNO 12  
 PROCNO 1

F2 - Acquisition Parameter  
 Date\_ 20211116  
 Time 15.51 h  
 INSTRUM spect  
 PROBHD Z125869\_0055 (  
 PULPROG zgpg30  
 TD 65536  
 SOLVENT CD3CN  
 NS 16  
 DS 4  
 SWH 81521.742 Hz  
 FIDRES 2.487846 Hz  
 AQ 0.4019541 sec  
 RG 190.44  
 DW 6.133 usec  
 DE 18.00 usec  
 TE 298.0 K  
 D1 2.00000000 sec  
 D11 0.03000000 sec  
 TD0 1  
 SFO1 202.4866909 MHz  
 NUC1 31P  
 P0 4.00 usec  
 P1 12.00 usec  
 PLW1 40.26200104 W  
 SFO2 500.2320009 MHz  
 NUC2 1H  
 CPDPRG[2] waltz16  
 PCPD2 80.00 usec  
 PLW2 11.44699955 W  
 PLW12 0.25756001 W  
 PLW13 0.12955000 W

F2 - Processing parameters  
 SI 32768  
 SF 202.4968157 MHz  
 WDW EM  
 SSB 0  
 LB 1.00 Hz  
 GB 0  
 PC 1.40

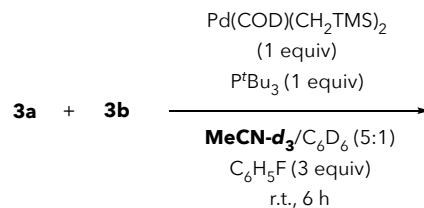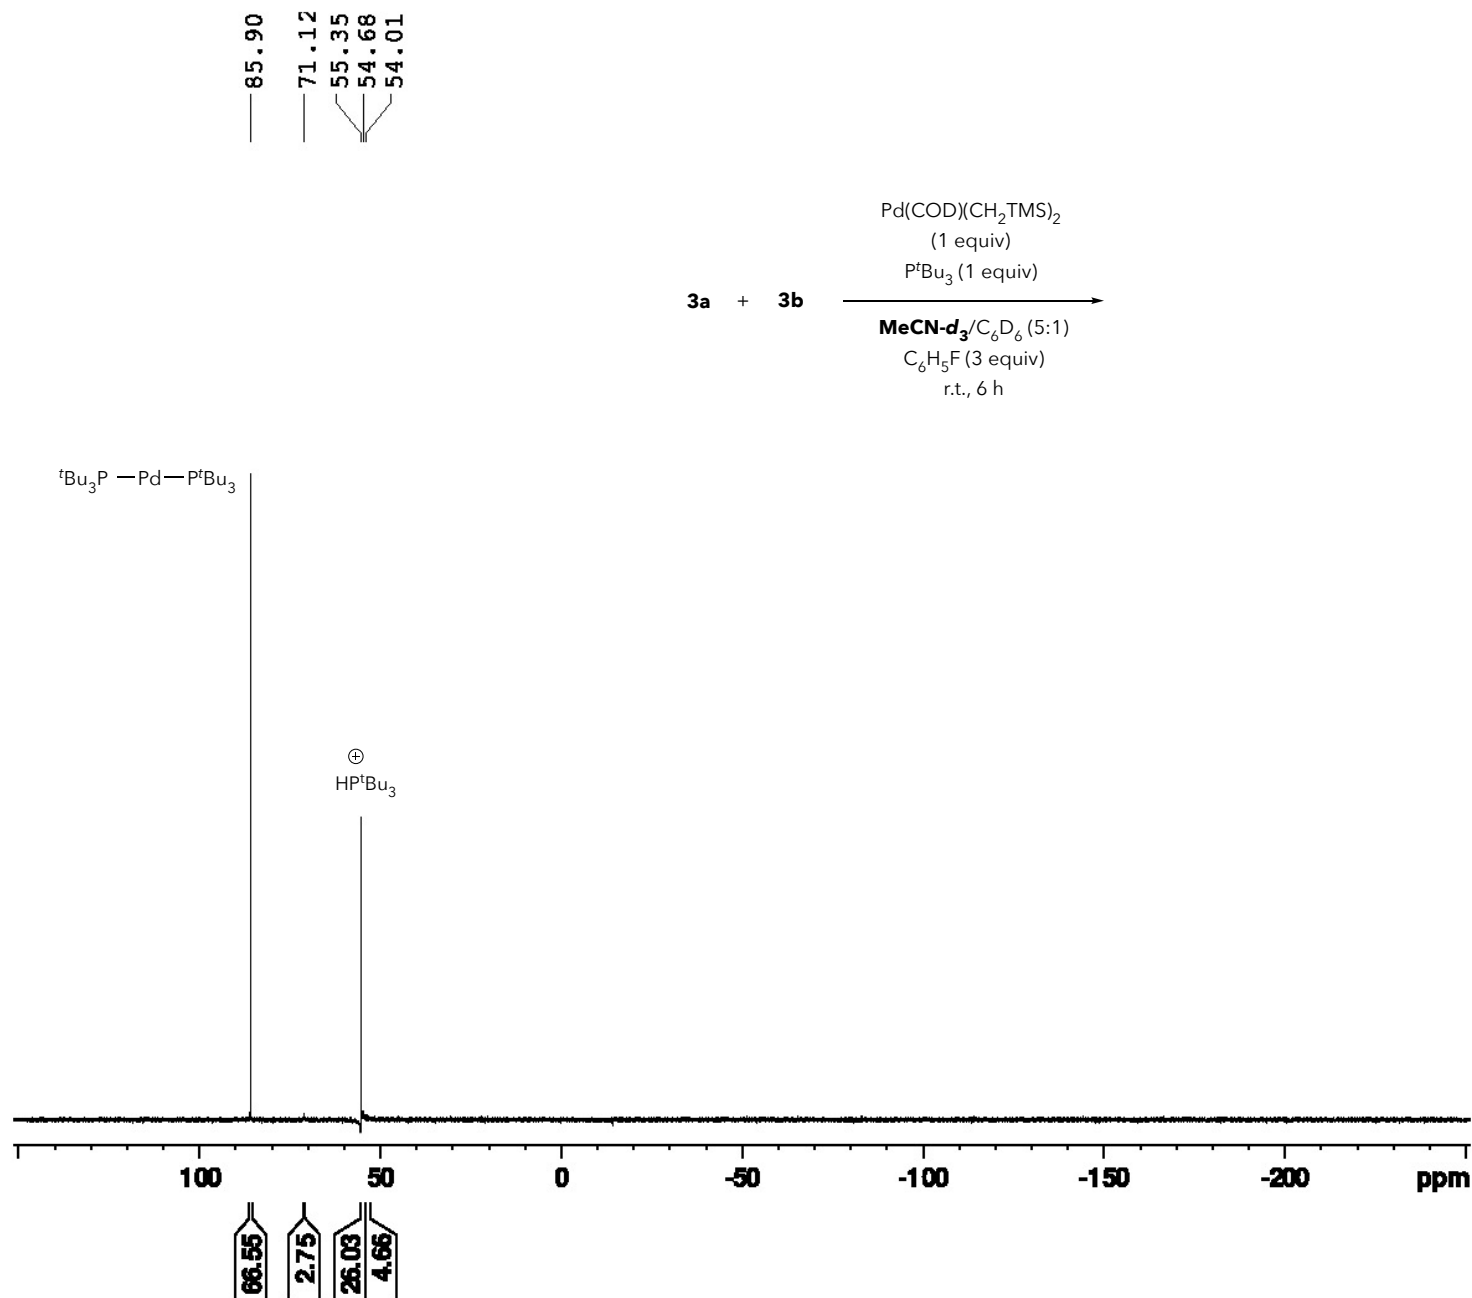

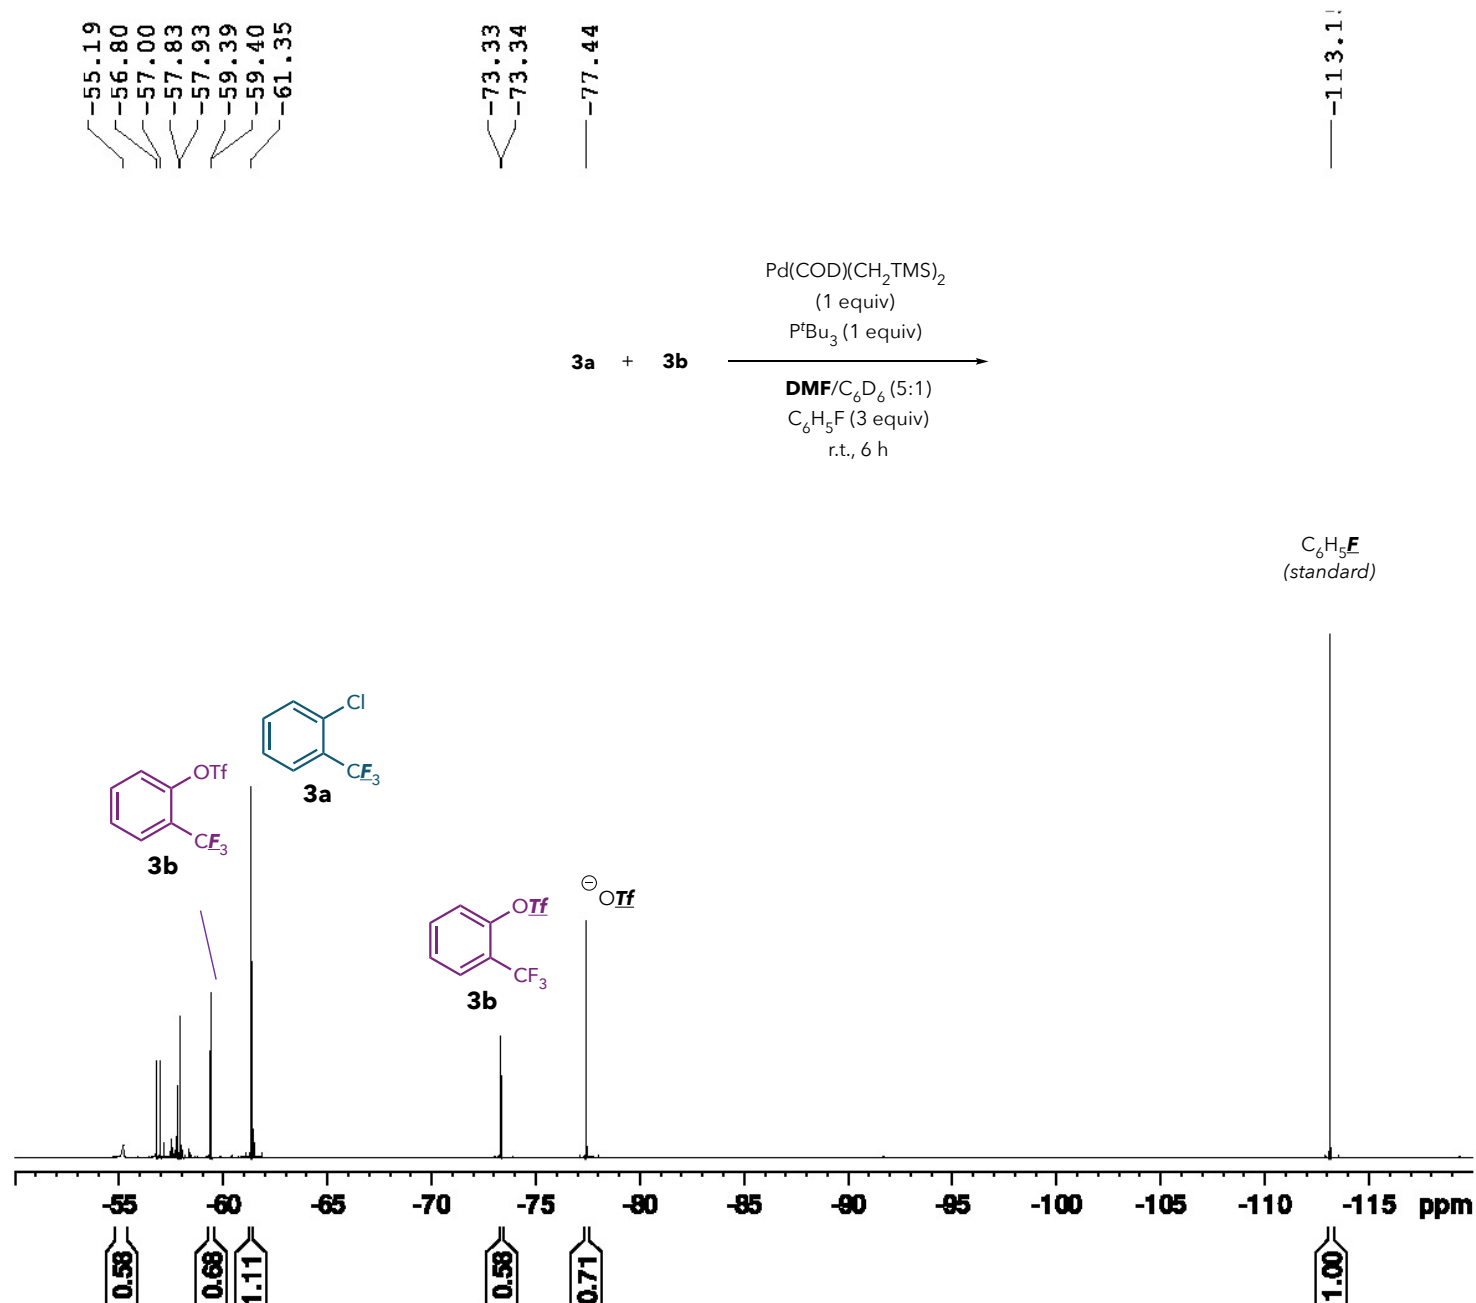

Current Data Parameters  
 NAME 6-SMR-39-11  
 EXPNO 10  
 PROCNO 2

F2 - Acquisition Parameter  
 Date\_ 20211115  
 Time 16.46 h  
 INSTRUM Avance Neo  
 PROBHD Z152088\_0031 (  
 PULPROG zgig  
 TD 131072  
 SOLVENT C6D6  
 NS 16  
 DS 4  
 SWH 90909.094 Hz  
 FIDRES 1.387163 Hz  
 AQ 0.7208960 sec  
 RG 101  
 DW 5.500 usec  
 DE 6.50 usec  
 TE 298.1 K  
 D1 1.00000000 sec  
 D11 0.03000000 sec  
 TD0 1  
 SFO1 376.4607164 MHz  
 NUC1 19F  
 P1 12.00 usec  
 PLW1 31.08900070 W  
 SFO2 400.1316005 MHz  
 NUC2 1H  
 CPDPRG[2] waltz16  
 PCPD2 90.00 usec  
 PLW2 24.03499985 W  
 PLW12 0.18990999 W

F2 - Processing parameters  
 SI 65536  
 SF 376.4978850 MHz  
 WDW EM  
 SSB 0  
 LB 0.30 Hz  
 GB 0  
 PC 1.00



Current Data Parameters  
 NAME 6-SMR-39-11  
 EXPNO 11  
 PROCNO 1

F2 - Acquisition Parameter  
 Date\_ 20211115  
 Time 16.50 h  
 INSTRUM Avance Neo  
 PROBHD Z152088\_0031 (  
 PULPROG zgpg30  
 TD 65536  
 SOLVENT C6D6  
 NS 32  
 DS 4  
 SWH 65789.477 Hz  
 FIDRES 2.007735 Hz  
 AQ 0.4980736 sec  
 RG 101  
 DW 7.600 usec  
 DE 6.50 usec  
 TE 298.0 K  
 D1 2.00000000 sec  
 D11 0.03000000 sec  
 TD0 1  
 SFO1 161.9674942 MHz  
 NUC1 31P  
 P0 2.67 usec  
 P1 8.00 usec  
 PLW1 45.86100006 W  
 SFO2 400.1316005 MHz  
 NUC2 1H  
 CPDPRG[2] waltz16  
 PCPD2 90.00 usec  
 PLW2 24.03499985 W  
 PLW12 0.18990999 W  
 PLW13 0.09552100 W

F2 - Processing parameters  
 SI 32768  
 SF 161.9755930 MHz  
 WDW EM  
 SSB 0  
 LB 1.00 Hz  
 GB 0  
 PC 1.40

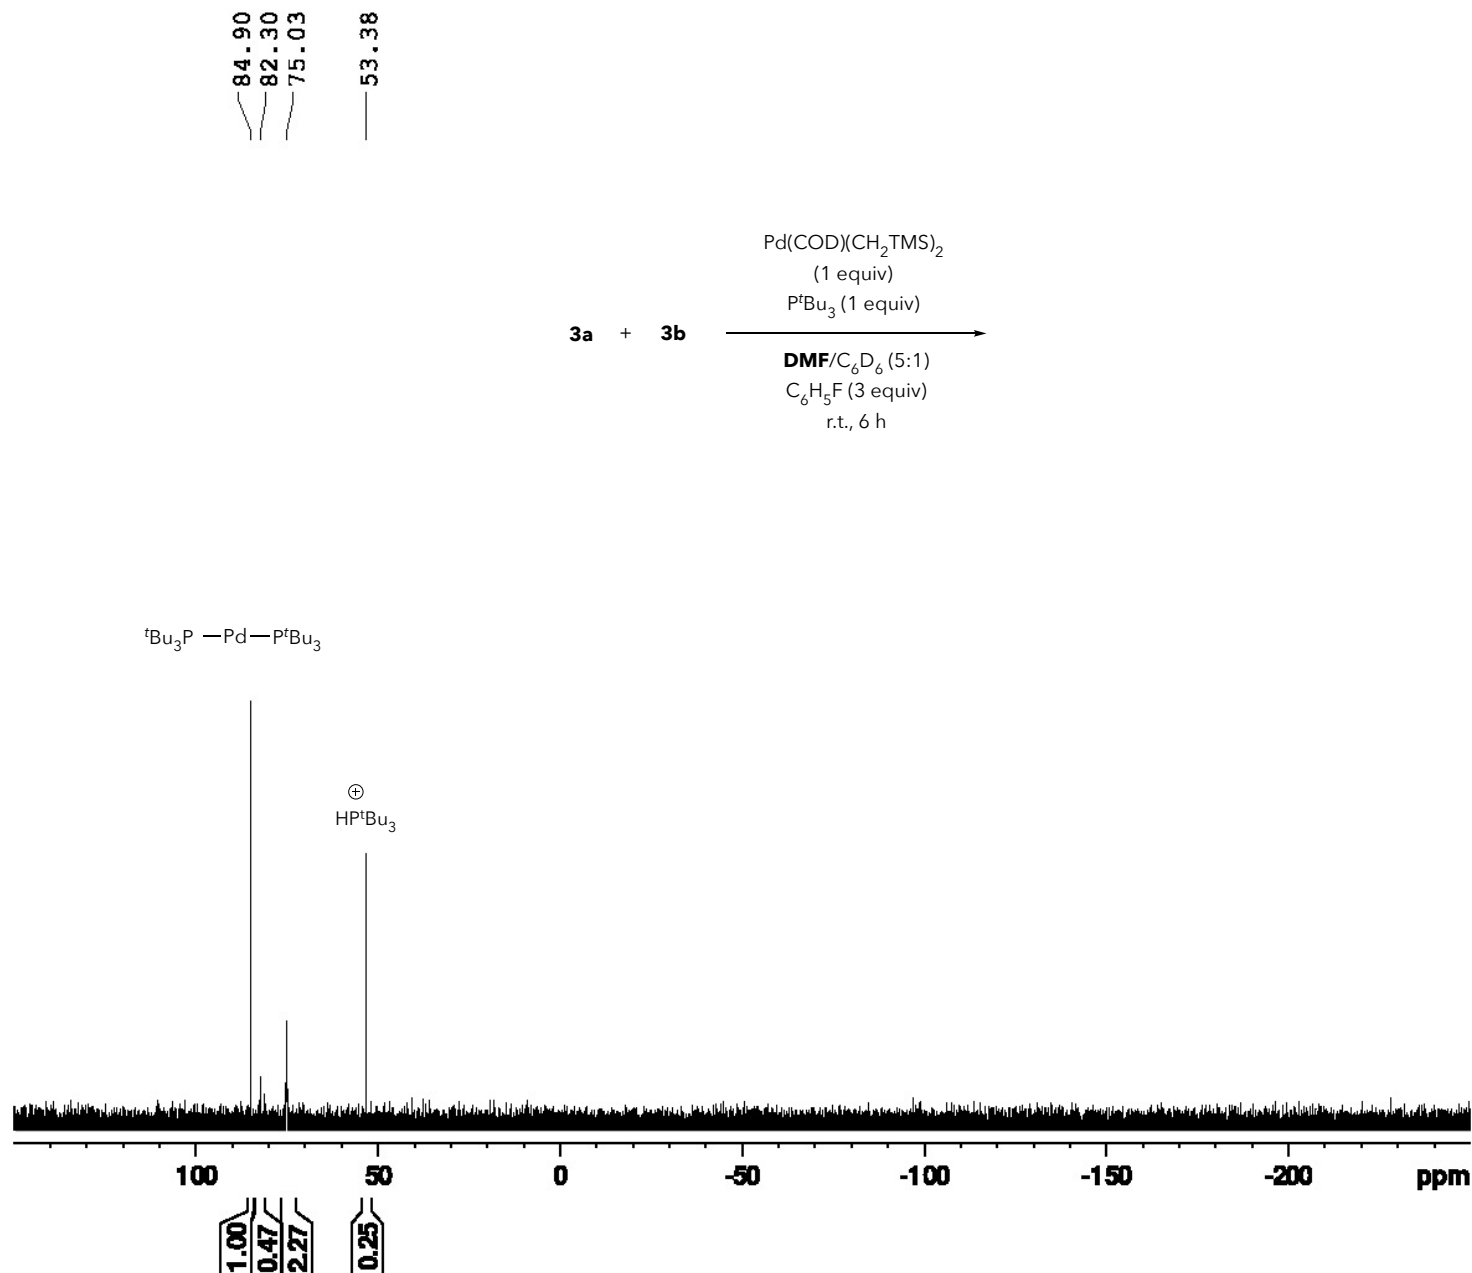



Current Data Parameters  
 NAME 6-SMR-41-11  
 EXPNO 10  
 PROCNO 1

F2 - Acquisition Parameter  
 Date\_ 20211116  
 Time 16.15 h  
 INSTRUM spect  
 PROBHD Z125869\_0055 (  
 PULPROG zg30  
 TD 65536  
 SOLVENT DMF  
 NS 64  
 DS 2  
 SWH 10000.000 Hz  
 FIDRES 0.305176 Hz  
 AQ 3.2767999 sec  
 RG 37.93  
 DW 50.000 usec  
 DE 16.00 usec  
 TE 298.0 K  
 D1 2.00000000 sec  
 TD0 1  
 SFO1 500.2330889 MHz  
 NUC1 1H  
 P0 4.00 usec  
 P1 12.00 usec  
 PLW1 11.44699955 W

F2 - Processing parameters  
 SI 65536  
 SF 500.2300000 MHz  
 WDW EM  
 SSB 0  
 LB 0.30 Hz  
 GB 0  
 PC 1.00

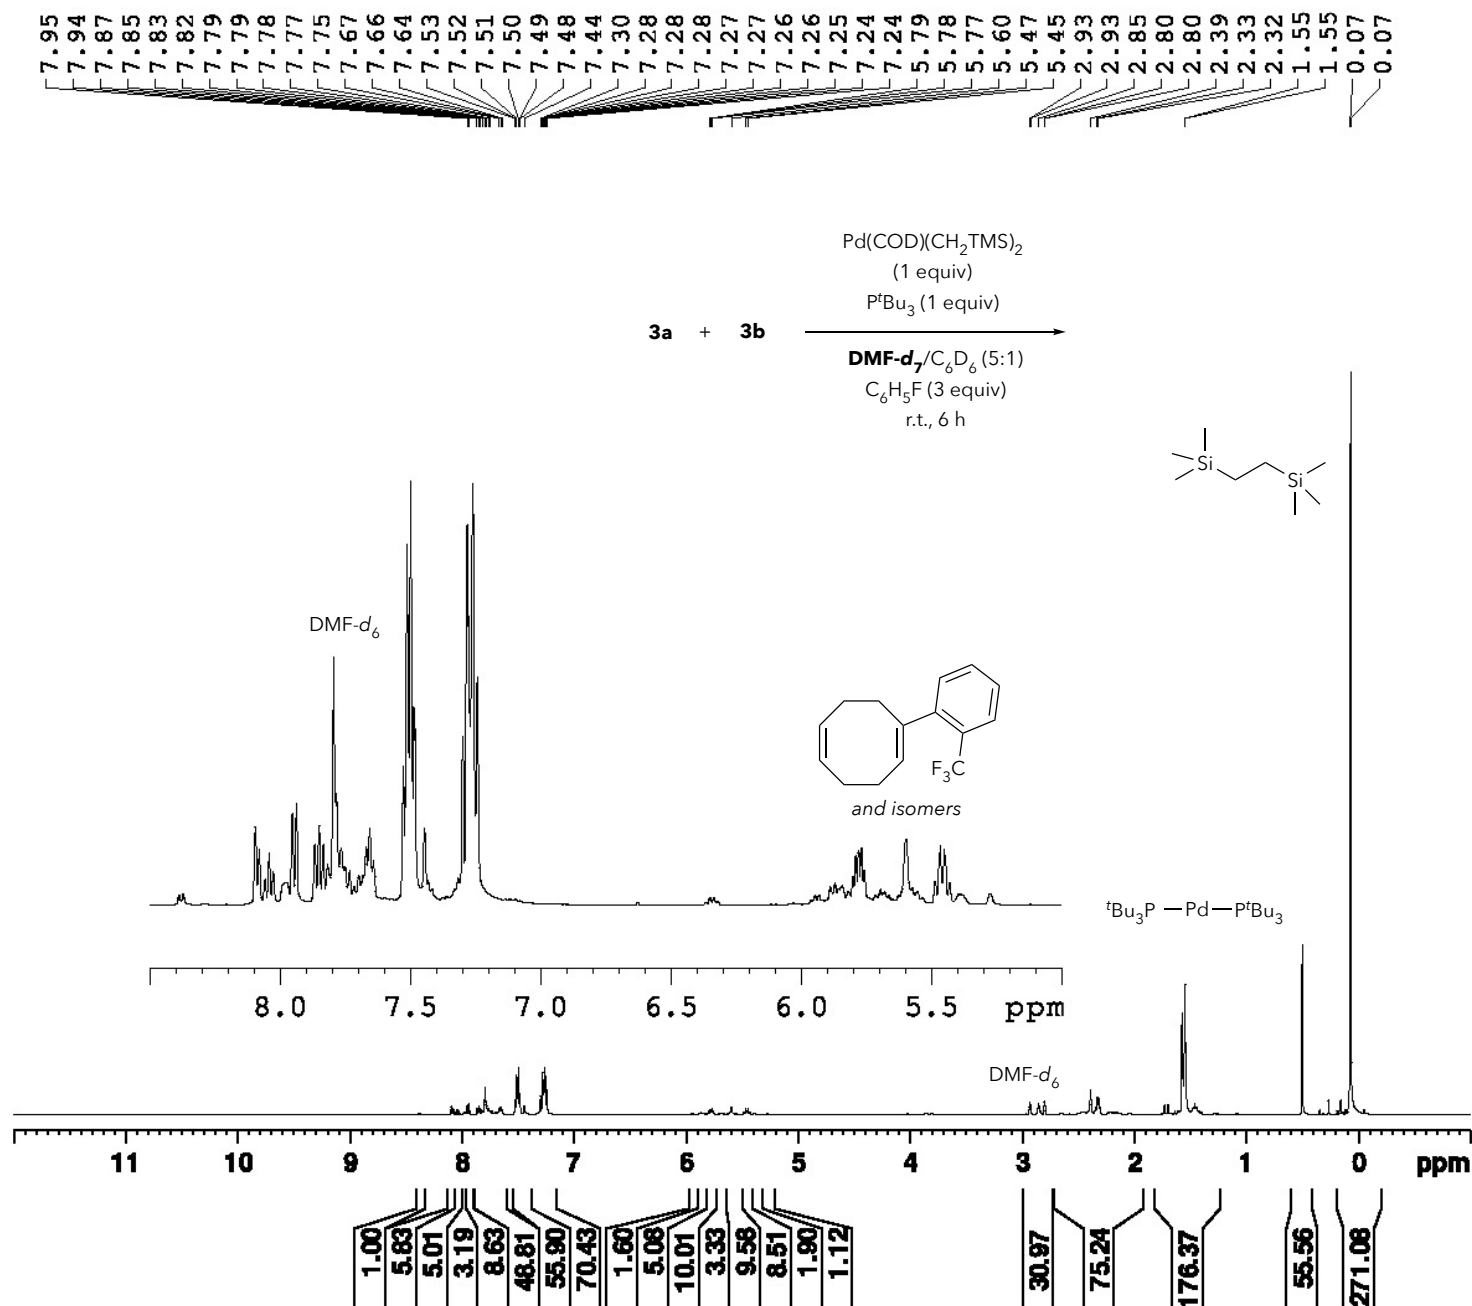

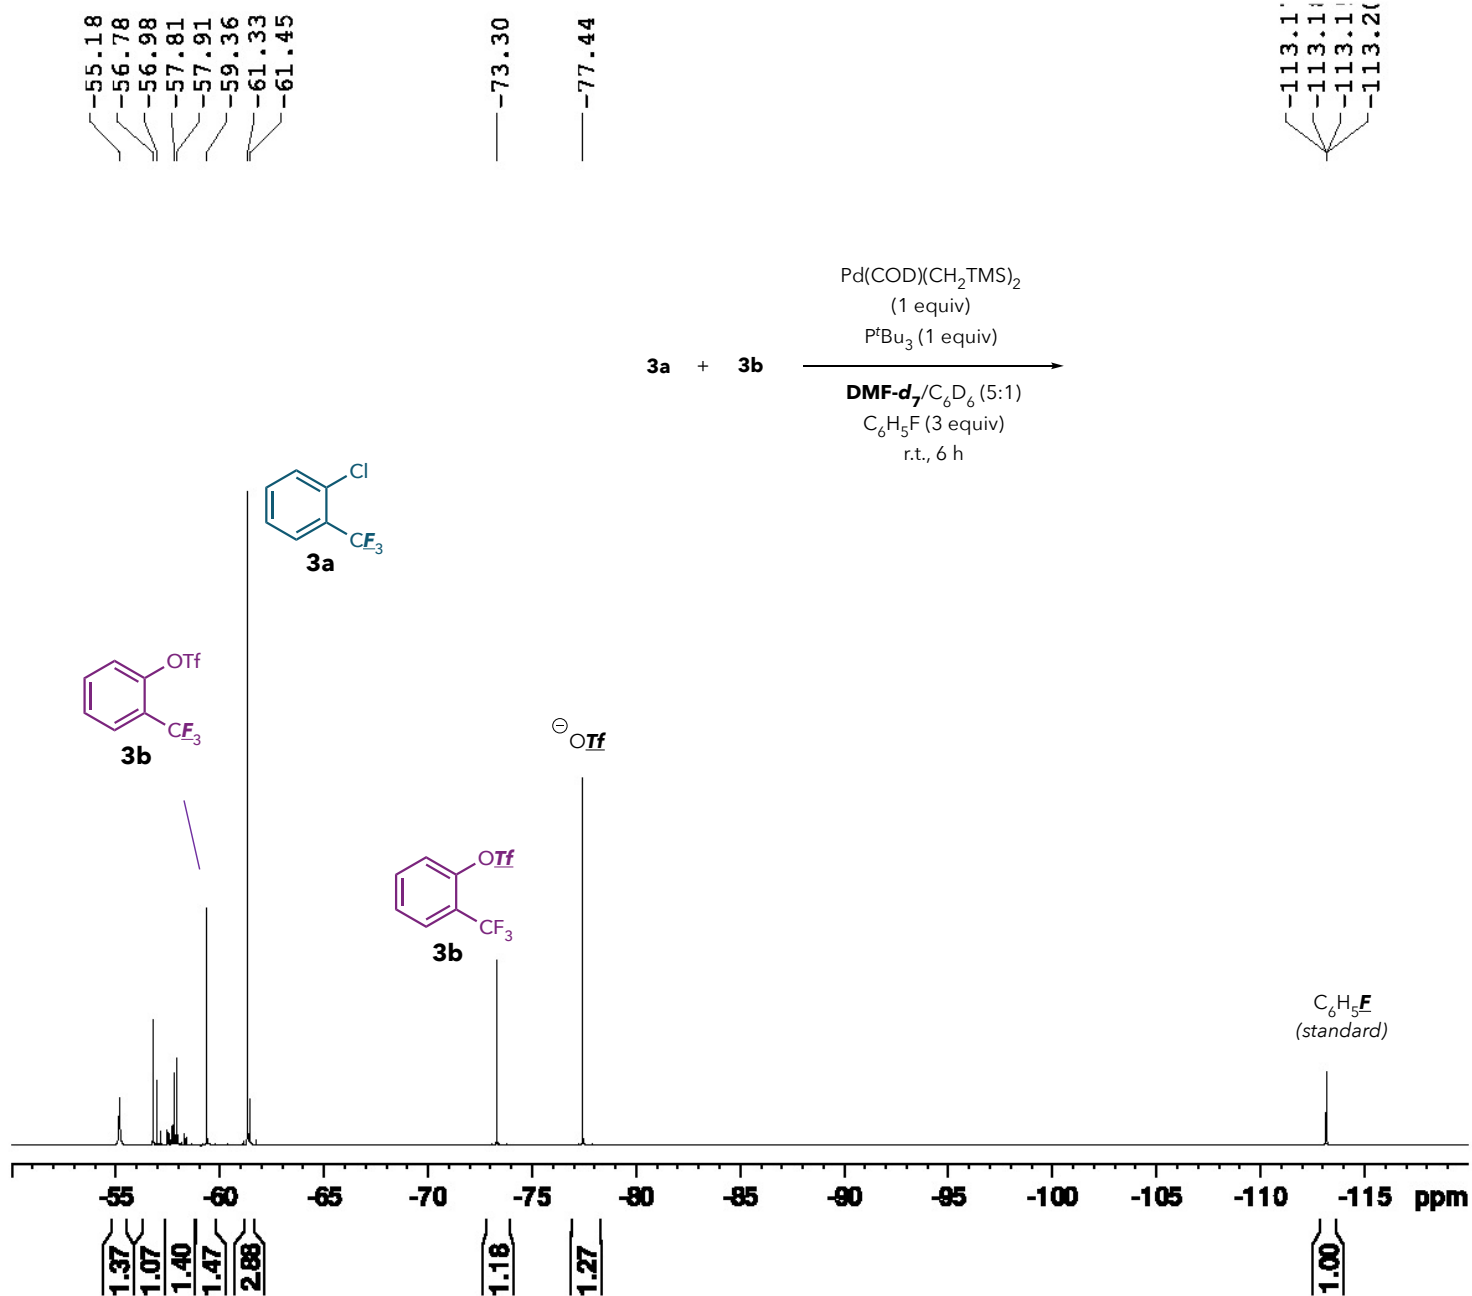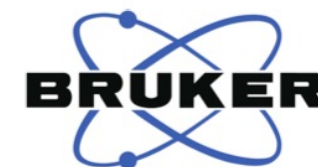

Current Data Parameters  
NAME 6-SMR-41-11  
EXPNO 11  
PROCNO 2

F2 - Acquisition Parameter  
Date\_ 20211116  
Time 16.17 h  
INSTRUM spect  
PROBHD Z125869\_0055 (  
PULPROG zgflgn  
TD 131072  
SOLVENT DMF  
NS 16  
DS 4  
SWH 113636.367 Hz  
FIDRES 1.733953 Hz  
AQ 0.5767168 sec  
RG 15.61  
DW 4.400 usec  
DE 18.00 usec  
TE 298.0 K  
D1 1.00000000 sec  
TD0 1  
SFO1 470.6394024 MHz  
NUC1 19F  
P1 15.00 usec  
PLW1 11.70800018 W

F2 - Processing parameters  
SI 65536  
SF 470.6859888 MHz  
WDW EM  
SSB 0  
LB 0.30 Hz  
GB 0  
PC 1.00

85.20  
82.49  
75.28  
53.66



Current Data Parameters  
NAME 6-SMR-41-11  
EXPNO 12  
PROCNO 1

F2 - Acquisition Parameter  
Date\_ 20211116  
Time 16.19 h  
INSTRUM spect  
PROBHD Z125869\_0055 (  
PULPROG zgpg30  
TD 65536  
SOLVENT DMF  
NS 16  
DS 4  
SWH 81521.742 Hz  
FIDRES 2.487846 Hz  
AQ 0.4019541 sec  
RG 190.44  
DW 6.133 usec  
DE 18.00 usec  
TE 298.0 K  
D1 2.00000000 sec  
D11 0.03000000 sec  
TD0 1  
SFO1 202.4866909 MHz  
NUC1 31P  
P0 4.00 usec  
P1 12.00 usec  
PLW1 40.26200104 W  
SFO2 500.2320009 MHz  
NUC2 1H  
CPDPRG[2] waltz16  
PCPD2 80.00 usec  
PLW2 11.44699955 W  
PLW12 0.25756001 W  
PLW13 0.12955000 W

F2 - Processing parameters  
SI 32768  
SF 202.4968157 MHz  
WDW EM  
SSB 0  
LB 1.00 Hz  
GB 0  
PC 1.40

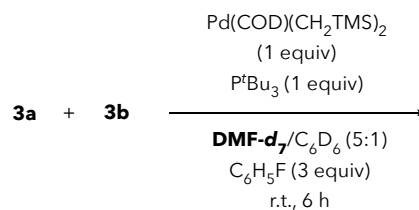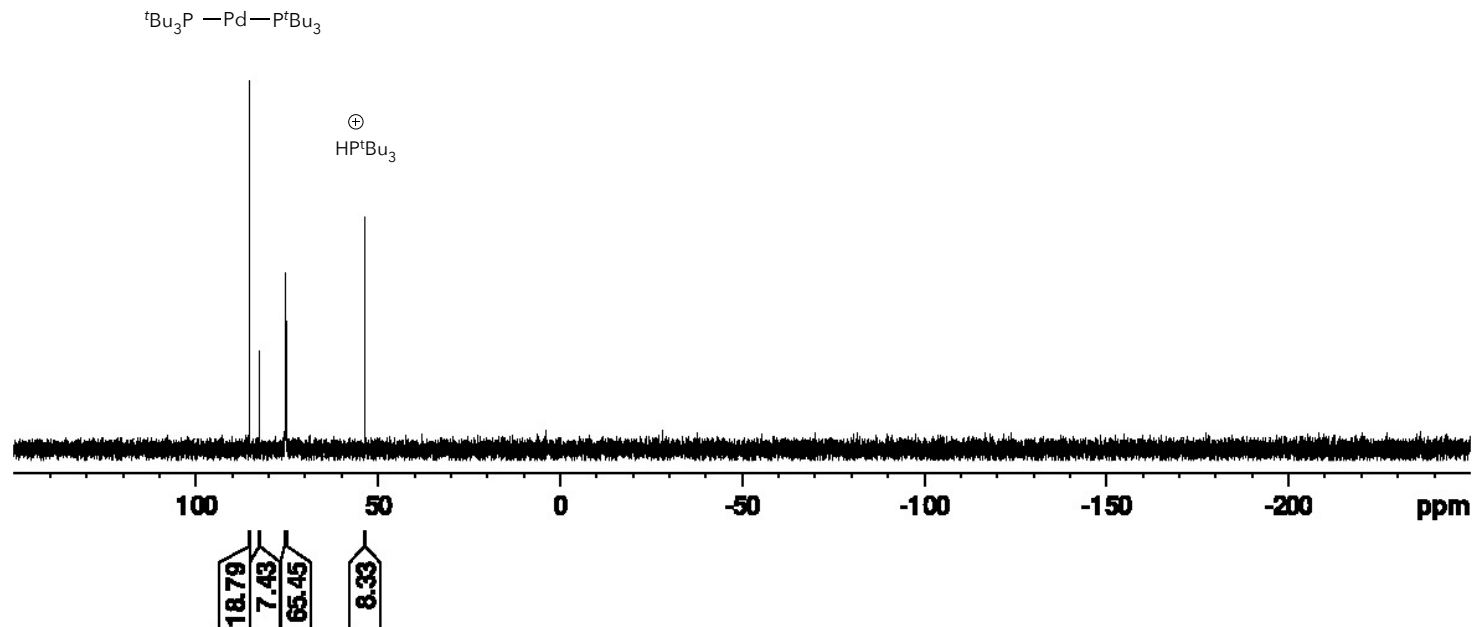

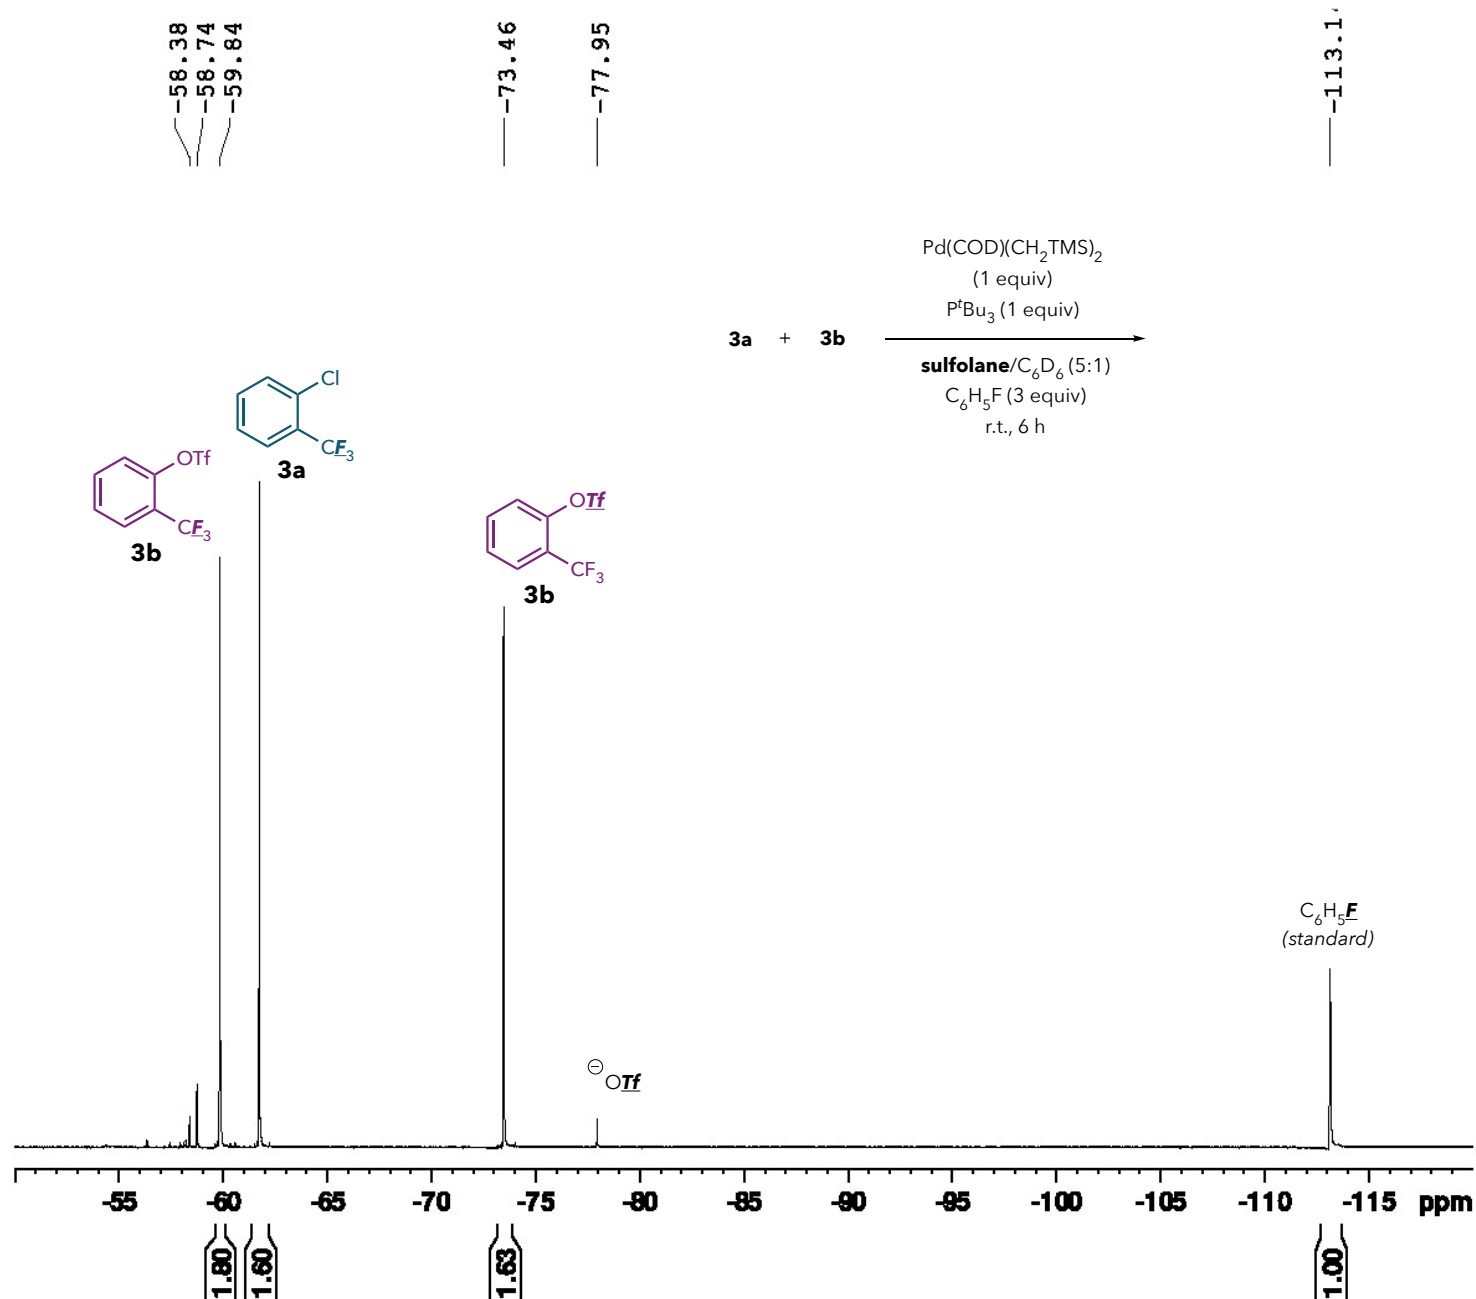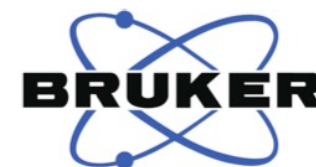

Current Data Parameters  
NAME 6-SMR-5-15  
EXPNO 10  
PROCNO 2

F2 - Acquisition Parameter  
Date\_ 20210911  
Time 20.34 h  
INSTRUM Avance Neo  
PROBHD Z152088\_0031 (  
PULPROG zg  
TD 130892  
SOLVENT C6D6  
NS 16  
DS 4  
SWH 90909.094 Hz  
FIDRES 1.389070 Hz  
AQ 0.7199060 sec  
RG 101  
DW 5.500 usec  
DE 6.50 usec  
TE 298.0 K  
D1 1.00000000 sec  
TD0 1  
SFO1 376.4607164 MHz  
NUC1 19F  
P1 12.00 usec  
PLW1 31.08900070 W

F2 - Processing parameters  
SI 65536  
SF 376.4982209 MHz  
WDW EM  
SSB 0  
LB 0.30 Hz  
GB 0  
PC 1.00

— 84.87  
— 70.42

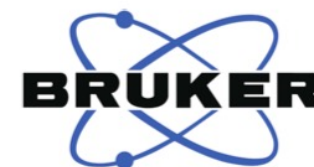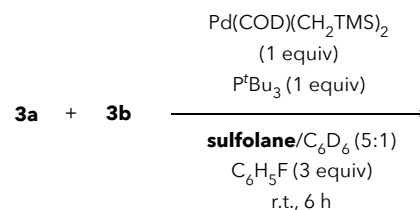

Current Data Parameters  
 NAME 6-SMR-5-15  
 EXPNO 11  
 PROCNO 2

F2 - Acquisition Parameter  
 Date\_ 20210911  
 Time 20.38 h  
 INSTRUM Avance Neo  
 PROBHD Z152088\_0031 (  
 PULPROG zgpg30  
 TD 65536  
 SOLVENT  $\text{C}_6\text{D}_6$   
 NS 32  
 DS 4  
 SWH 65789.477 Hz  
 FIDRES 2.007735 Hz  
 AQ 0.4980736 sec  
 RG 101  
 DW 7.600 usec  
 DE 6.50 usec  
 TE 298.0 K  
 D1 2.00000000 sec  
 D11 0.03000000 sec  
 TD0 1  
 SFO1 161.9674942 MHz  
 NUC1  $^{31}\text{P}$   
 P0 2.67 usec  
 P1 8.00 usec  
 PLW1 45.86100006 W  
 SFO2 400.1316005 MHz  
 NUC2  $^1\text{H}$   
 CPDPRG[2] waltz16  
 PCPD2 90.00 usec  
 PLW2 24.03499985 W  
 PLW12 0.18990999 W  
 PLW13 0.09552100 W

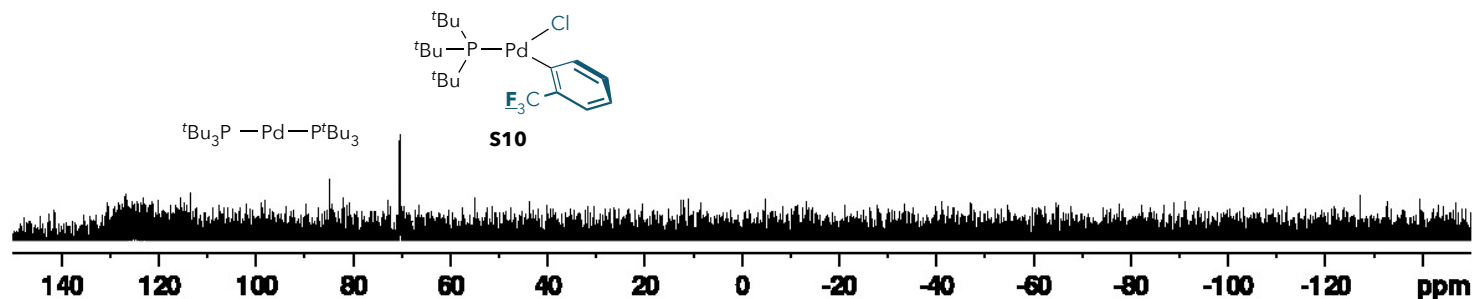

F2 - Processing parameters  
 SI 32768  
 SF 161.9755930 MHz  
 WDW EM  
 SSB 0  
 LB 1.00 Hz  
 GB 0  
 PC 1.40

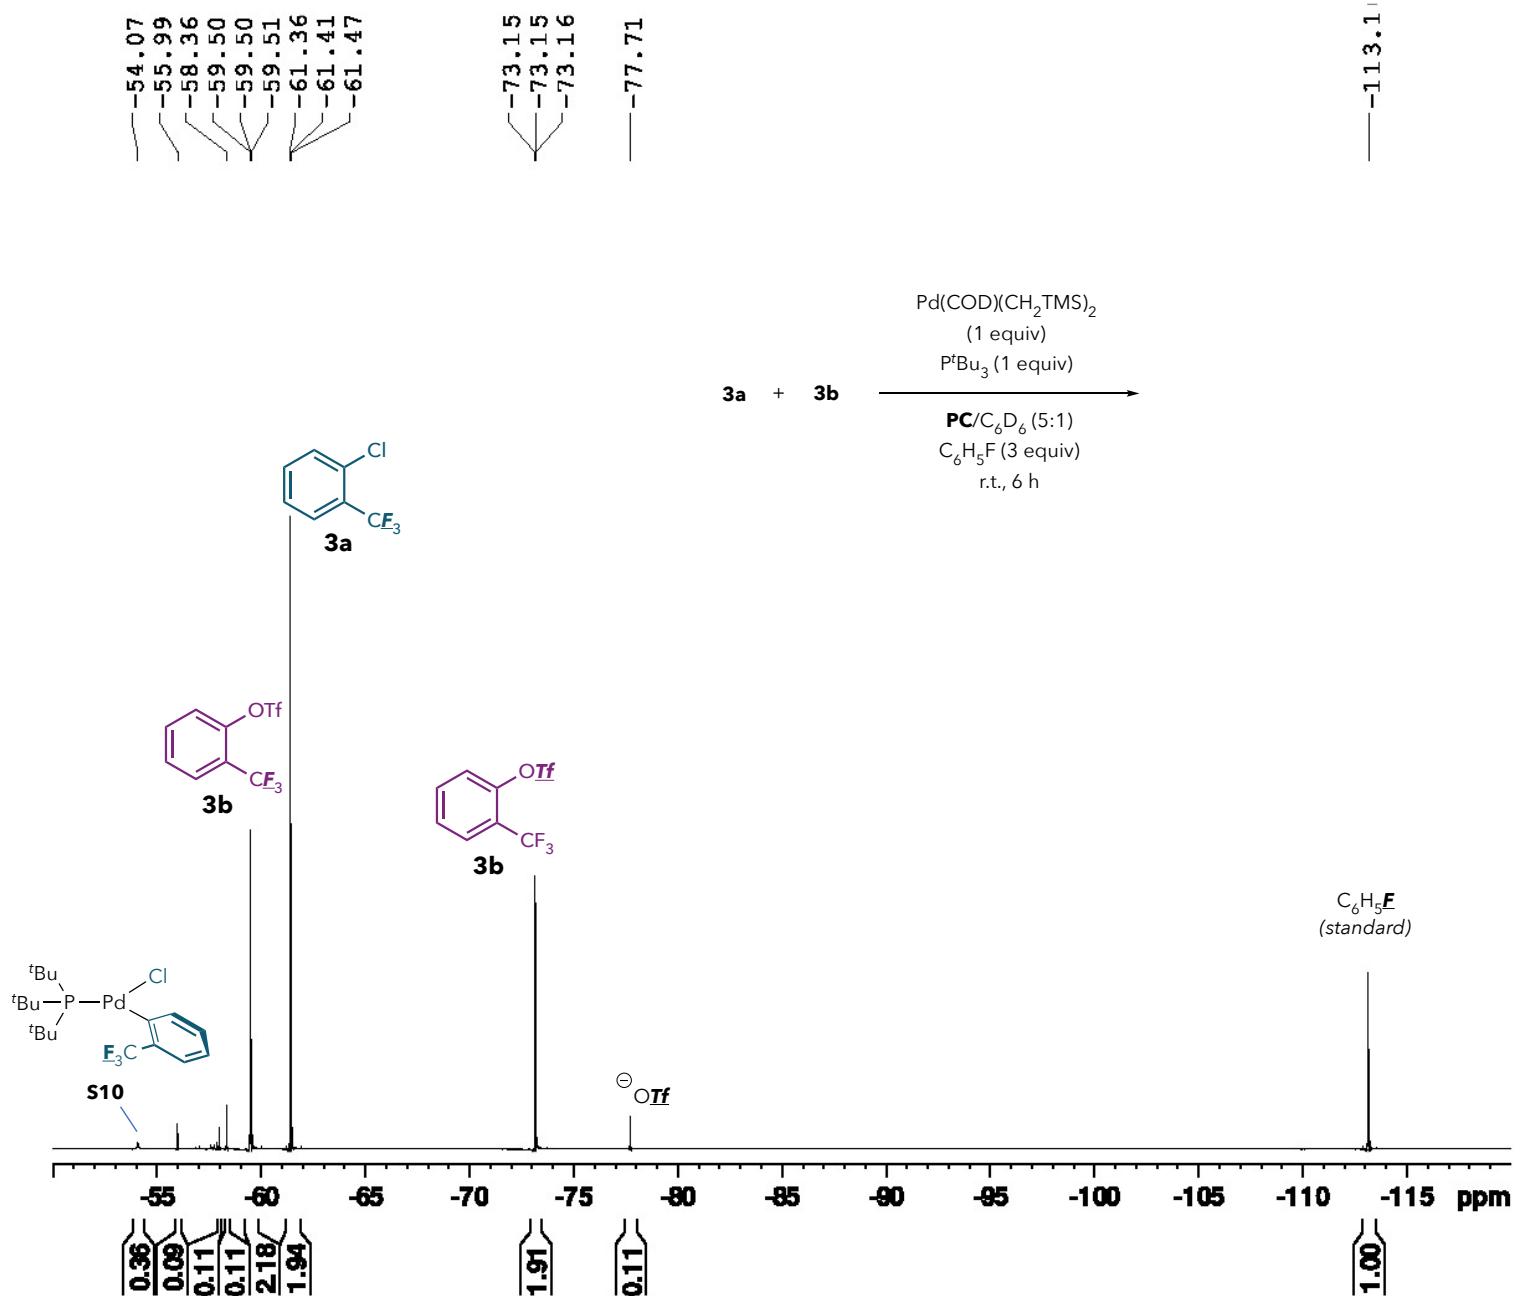

Current Data Parameters  
NAME 6-SMR-39-15  
EXPNO 10  
PROCNO 2

F2 - Acquisition Parameter  
Date\_ 20211115  
Time 17.06 h  
INSTRUM Avance Neo  
PROBHD Z152088\_0031 (  
PULPROG zgig  
TD 131072  
SOLVENT C6D6  
NS 16  
DS 4  
SWH 90909.094 Hz  
FIDRES 1.387163 Hz  
AQ 0.7208960 sec  
RG 101  
DW 5.500 usec  
DE 6.50 usec  
TE 298.1 K  
D1 1.00000000 sec  
D11 0.03000000 sec  
TD0 1  
SFO1 376.4607164 MHz  
NUC1 19F  
P1 12.00 usec  
PLW1 31.08900070 W  
SFO2 400.1316005 MHz  
NUC2 1H  
CPDPRG[2] waltz16  
PCPD2 90.00 usec  
PLW2 24.03499985 W  
PLW12 0.18990999 W

F2 - Processing parameters  
SI 65536  
SF 376.4979014 MHz  
WDW EM  
SSB 0  
LB 0.30 Hz  
GB 0  
PC 1.00

84.74  
80.67  
70.72  
55.28



Current Data Parameters  
NAME 6-SMR-39-15  
EXPNO 11  
PROCNO 1

F2 - Acquisition Parameter  
Date\_ 20211115  
Time 17.09 h  
INSTRUM Avance Neo  
PROBHD Z152088\_0031 (  
PULPROG zgpg30  
TD 65536  
SOLVENT C6D6  
NS 32  
DS 4  
SWH 65789.477 Hz  
FIDRES 2.007735 Hz  
AQ 0.4980736 sec  
RG 101  
DW 7.600 usec  
DE 6.50 usec  
TE 298.0 K  
D1 2.00000000 sec  
D11 0.03000000 sec  
TD0 1  
SFO1 161.9674942 MHz  
NUC1 31P  
P0 2.67 usec  
P1 8.00 usec  
PLW1 45.86100006 W  
SFO2 400.1316005 MHz  
NUC2 1H  
CPDPRG[2] waltz16  
PCPD2 90.00 usec  
PLW2 24.03499985 W  
PLW12 0.18990999 W  
PLW13 0.09552100 W

F2 - Processing parameters  
SI 32768  
SF 161.9755930 MHz  
WDW EM  
SSB 0  
LB 1.00 Hz  
GB 0  
PC 1.40

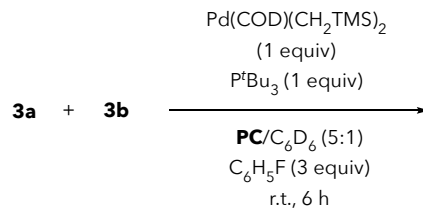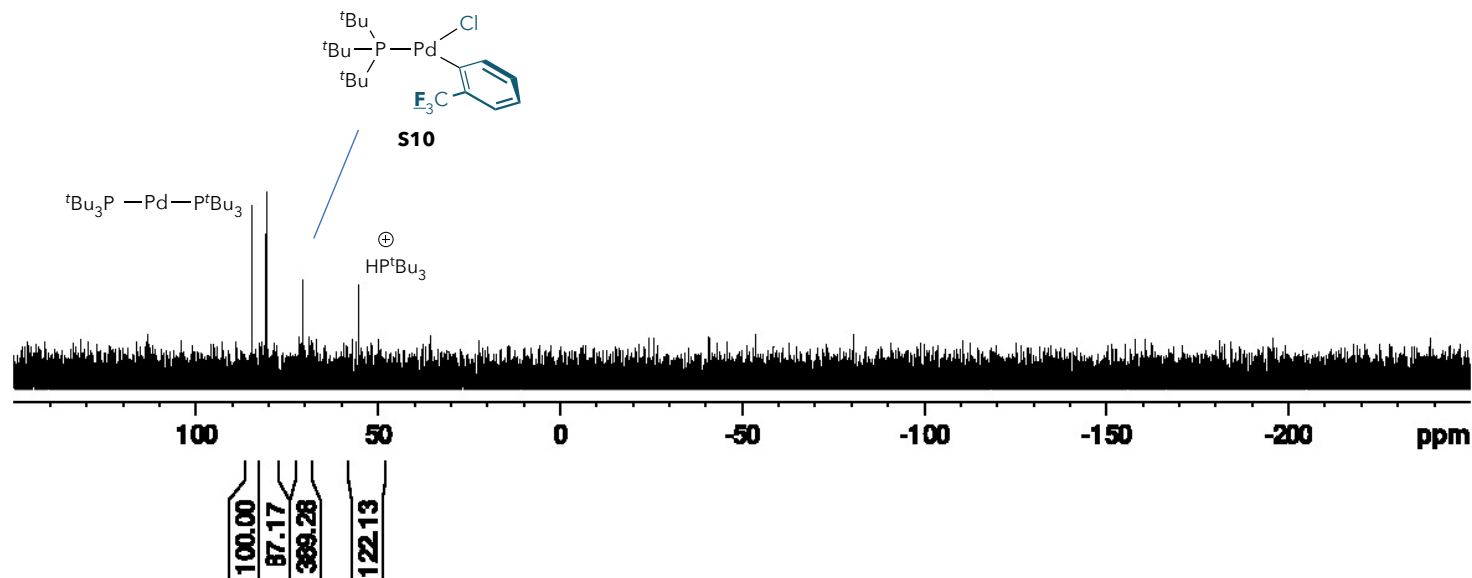

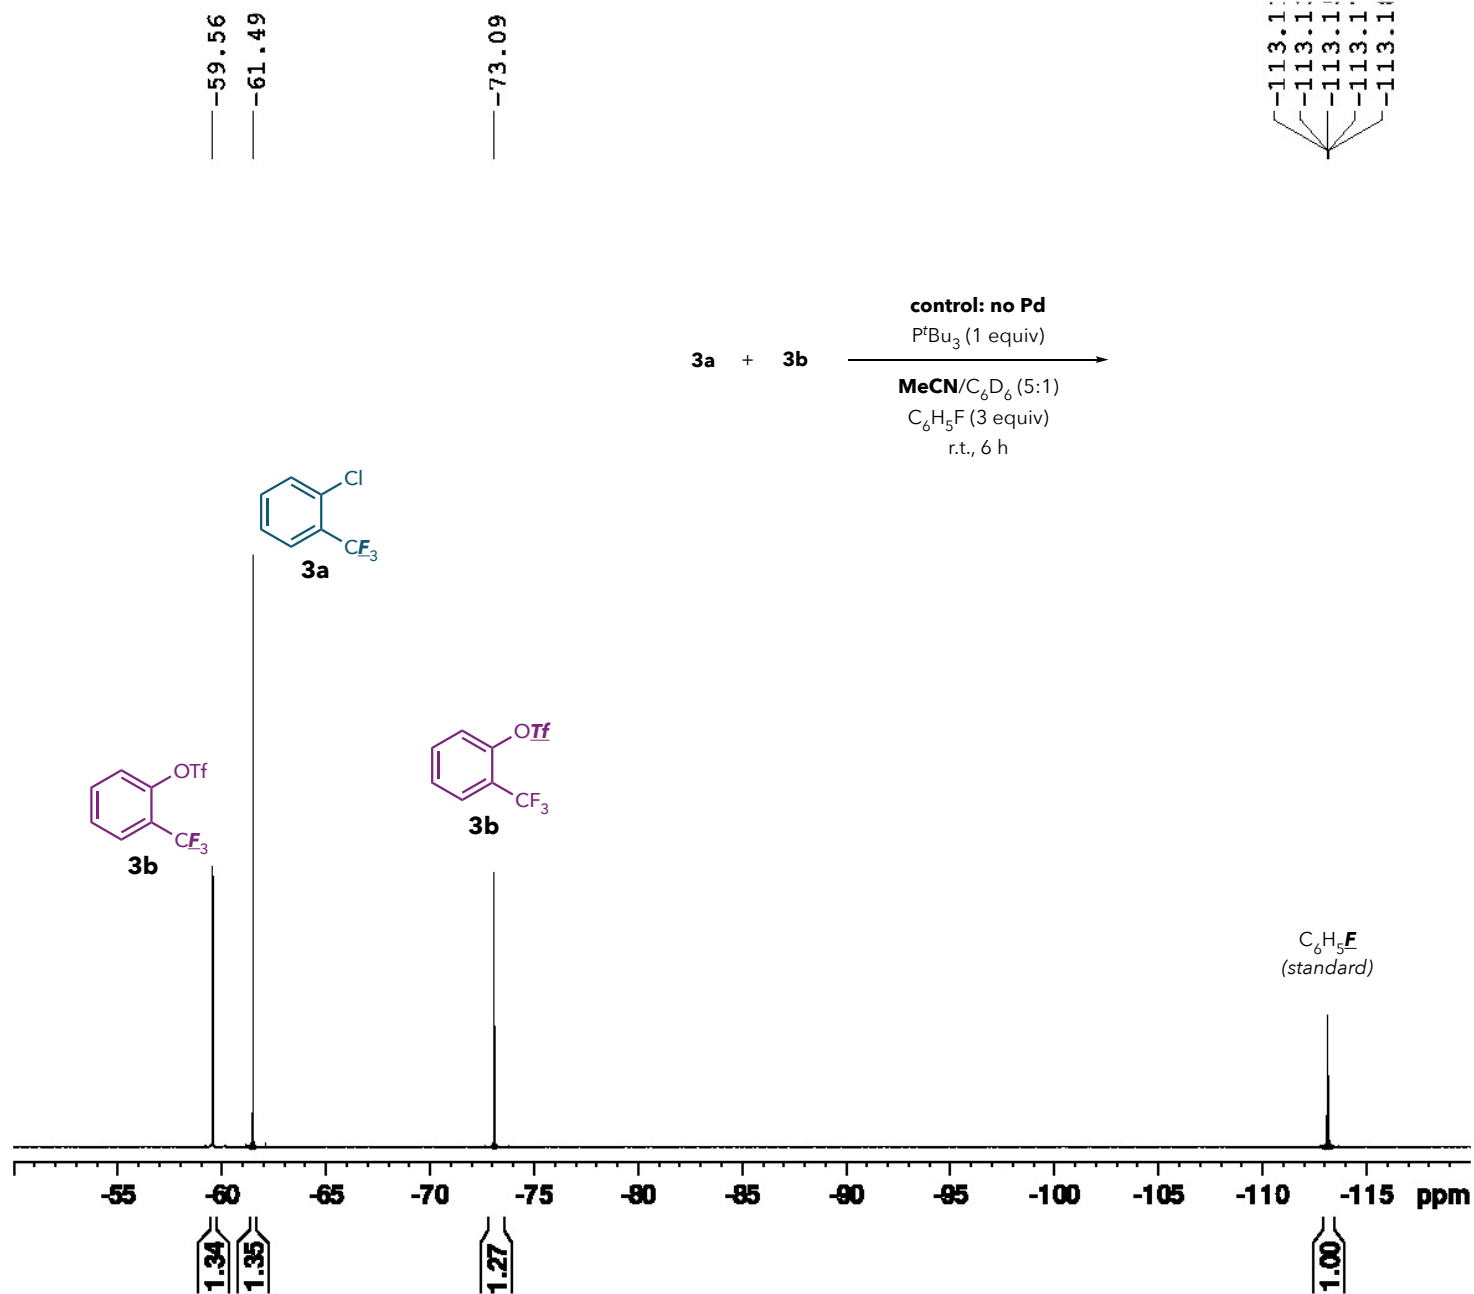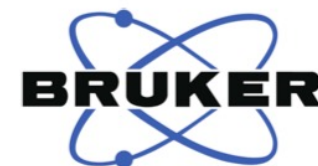

Current Data Parameters  
 NAME ER-6-55-2control\_pdfree\_  
 EXPNO 1  
 PROCNO 1

F2 - Acquisition Parameters  
 Date\_ 20200707  
 Time 10.25  
 INSTRUM spect  
 PROBD 5 mm QNP 1H/13  
 PULPROG zgpg30  
 TD 32768  
 SOLVENT C6D6  
 NS 64  
 DS 0  
 SWH 50125.312 Hz  
 FIDRES 1.529703 Hz  
 AQ 0.3268608 sec  
 RG 2896.3  
 DW 9.975 usec  
 DE 6.00 usec  
 TE 683.2 K  
 D1 1.50000000 sec  
 TD0 1

CHANNEL f1  
 NUC1 19F  
 P1 9.00 usec  
 PL1 0 dB  
 SFO1 282.4250465 MHz

F2 - Processing parameters  
 SI 65536  
 SF 282.4415558 MHz  
 WDW EM  
 SSB 0  
 LB 0.30 Hz  
 GB 0  
 PC 1.00

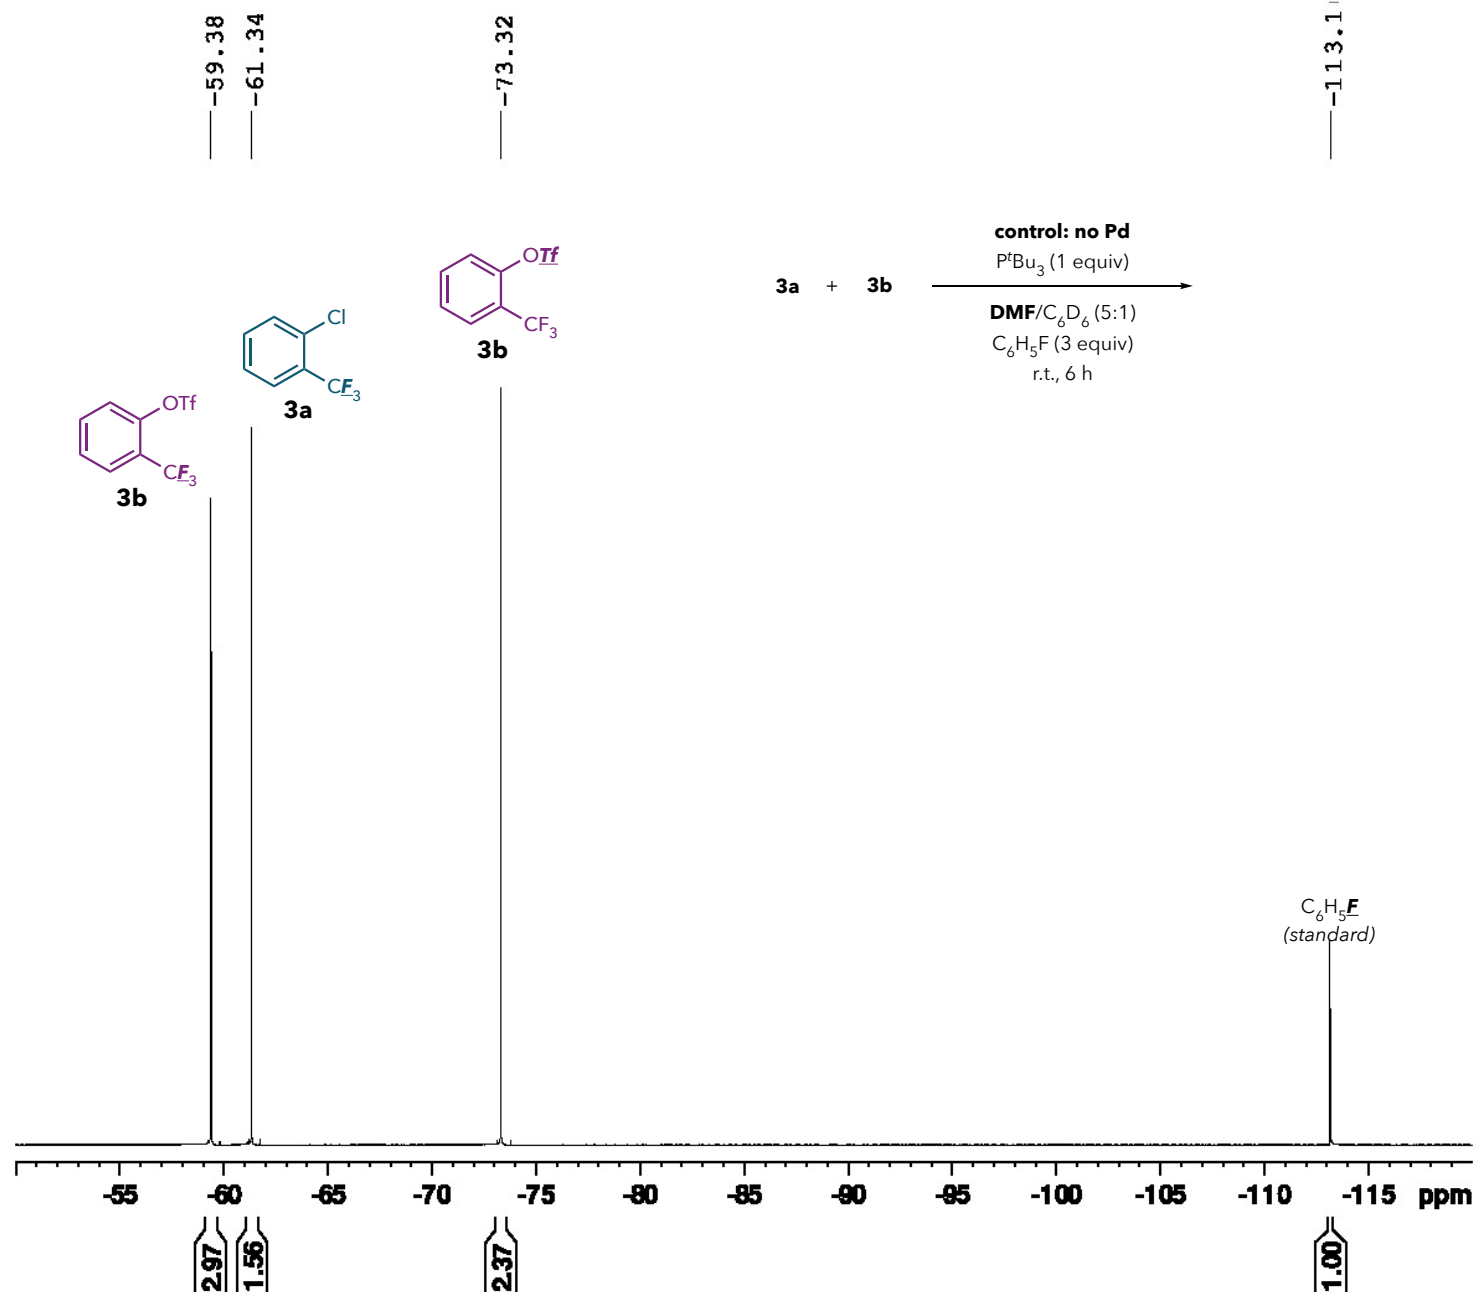

Current Data Parameters  
 NAME 5-SMR-95-1  
 EXPNO 10  
 PROCNO 2

F2 - Acquisition Parameter  
 Date\_ 20210519  
 Time 17.06 h  
 INSTRUM spect  
 PROBHD Z125869\_0055 (  
 PULPROG zgflgn  
 TD 130892  
 SOLVENT C6D6  
 NS 16  
 DS 4  
 SWH 113636.367 Hz  
 FIDRES 1.736338 Hz  
 AQ 0.5759248 sec  
 RG 15.61  
 DW 4.400 usec  
 DE 18.00 usec  
 TE 300.0 K  
 D1 1.00000000 sec  
 TD0 1  
 SFO1 470.6394024 MHz  
 NUC1 19F  
 P1 15.00 usec  
 PLW1 11.70800018 W

F2 - Processing parameters  
 SI 65536  
 SF 470.6858616 MHz  
 WDW EM  
 SSB 0  
 LB 0.30 Hz  
 GB 0  
 PC 1.00

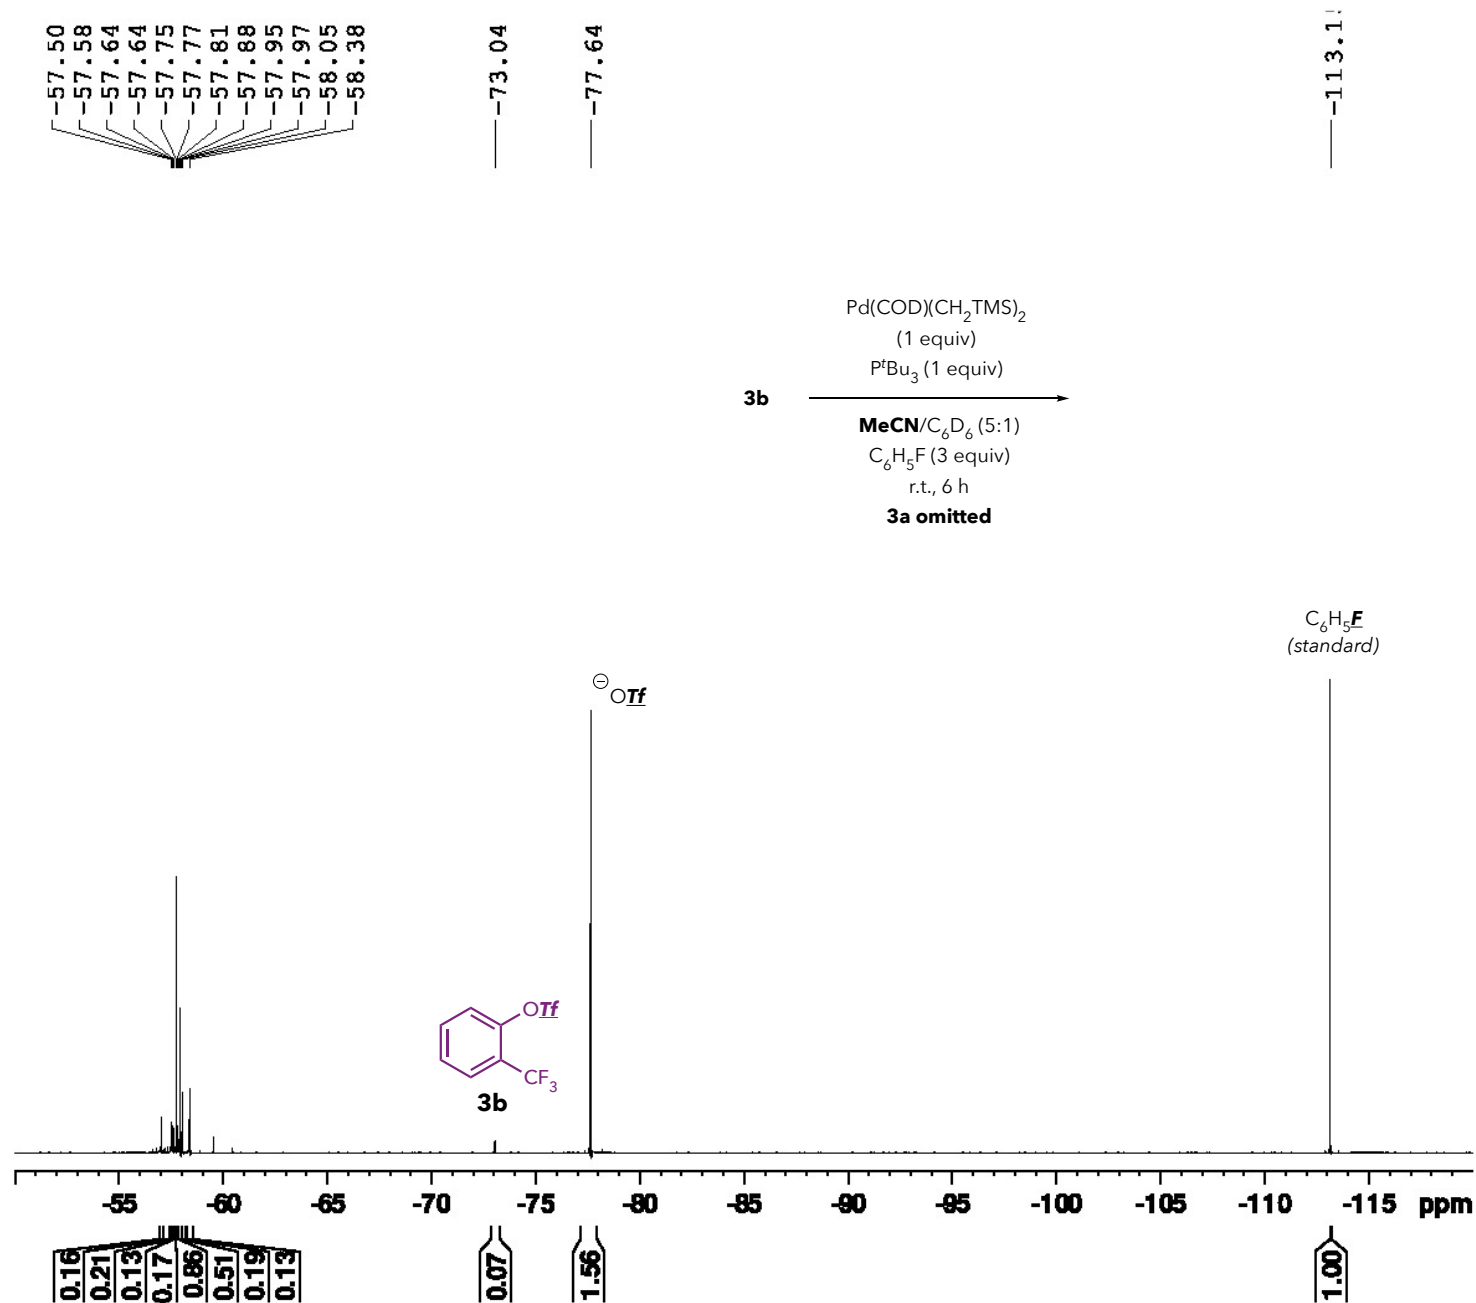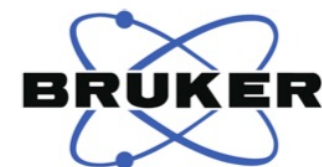

Current Data Parameters  
NAME 6-SMR-40-4  
EXPNO 10  
PROCNO 2

F2 - Acquisition Parameter  
Date\_ 20211115  
Time 17.49 h  
INSTRUM Avance Neo  
PROBHD Z152088\_0031 (  
PULPROG zgig  
TD 131072  
SOLVENT C6D6  
NS 16  
DS 4  
SWH 90909.094 Hz  
FIDRES 1.387163 Hz  
AQ 0.7208960 sec  
RG 101  
DW 5.500 usec  
DE 6.50 usec  
TE 298.1 K  
D1 1.00000000 sec  
D11 0.03000000 sec  
TD0 1  
SFO1 376.4607164 MHz  
NUC1 19F  
P1 12.00 usec  
PLW1 31.08900070 W  
SFO2 400.1316005 MHz  
NUC2 1H  
CPDPRG[2] waltz16  
PCPD2 90.00 usec  
PLW2 24.03499985 W  
PLW12 0.18990999 W

F2 - Processing parameters  
SI 65536  
SF 376.4977310 MHz  
WDW EM  
SSB 0  
LB 0.30 Hz  
GB 0  
PC 1.00

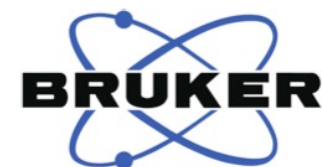

Current Data Parameters  
 NAME 6-SMR-40-4  
 EXPNO 11  
 PROCNO 1

F2 - Acquisition Parameter  
 Date\_ 20211115  
 Time 17.52 h  
 INSTRUM Avance Neo  
 PROBHD Z152088\_0031 (   
 PULPROG zgpg30  
 TD 65536  
 SOLVENT C6D6  
 NS 32  
 DS 4  
 SWH 65789.477 Hz  
 FIDRES 2.007735 Hz  
 AQ 0.4980736 sec  
 RG 101  
 DW 7.600 usec  
 DE 6.50 usec  
 TE 298.0 K  
 D1 2.00000000 sec  
 D11 0.03000000 sec  
 TD0 1  
 SFO1 161.9674942 MHz  
 NUC1 31P  
 P0 2.67 usec  
 P1 8.00 usec  
 PLW1 45.86100006 W  
 SFO2 400.1316005 MHz  
 NUC2 1H  
 CPDPRG[2] waltz16  
 PCPD2 90.00 usec  
 PLW2 24.03499985 W  
 PLW12 0.18990999 W  
 PLW13 0.09552100 W

F2 - Processing parameters  
 SI 32768  
 SF 161.9755930 MHz  
 WDW EM  
 SSB 0  
 LB 1.00 Hz  
 GB 0  
 PC 1.40

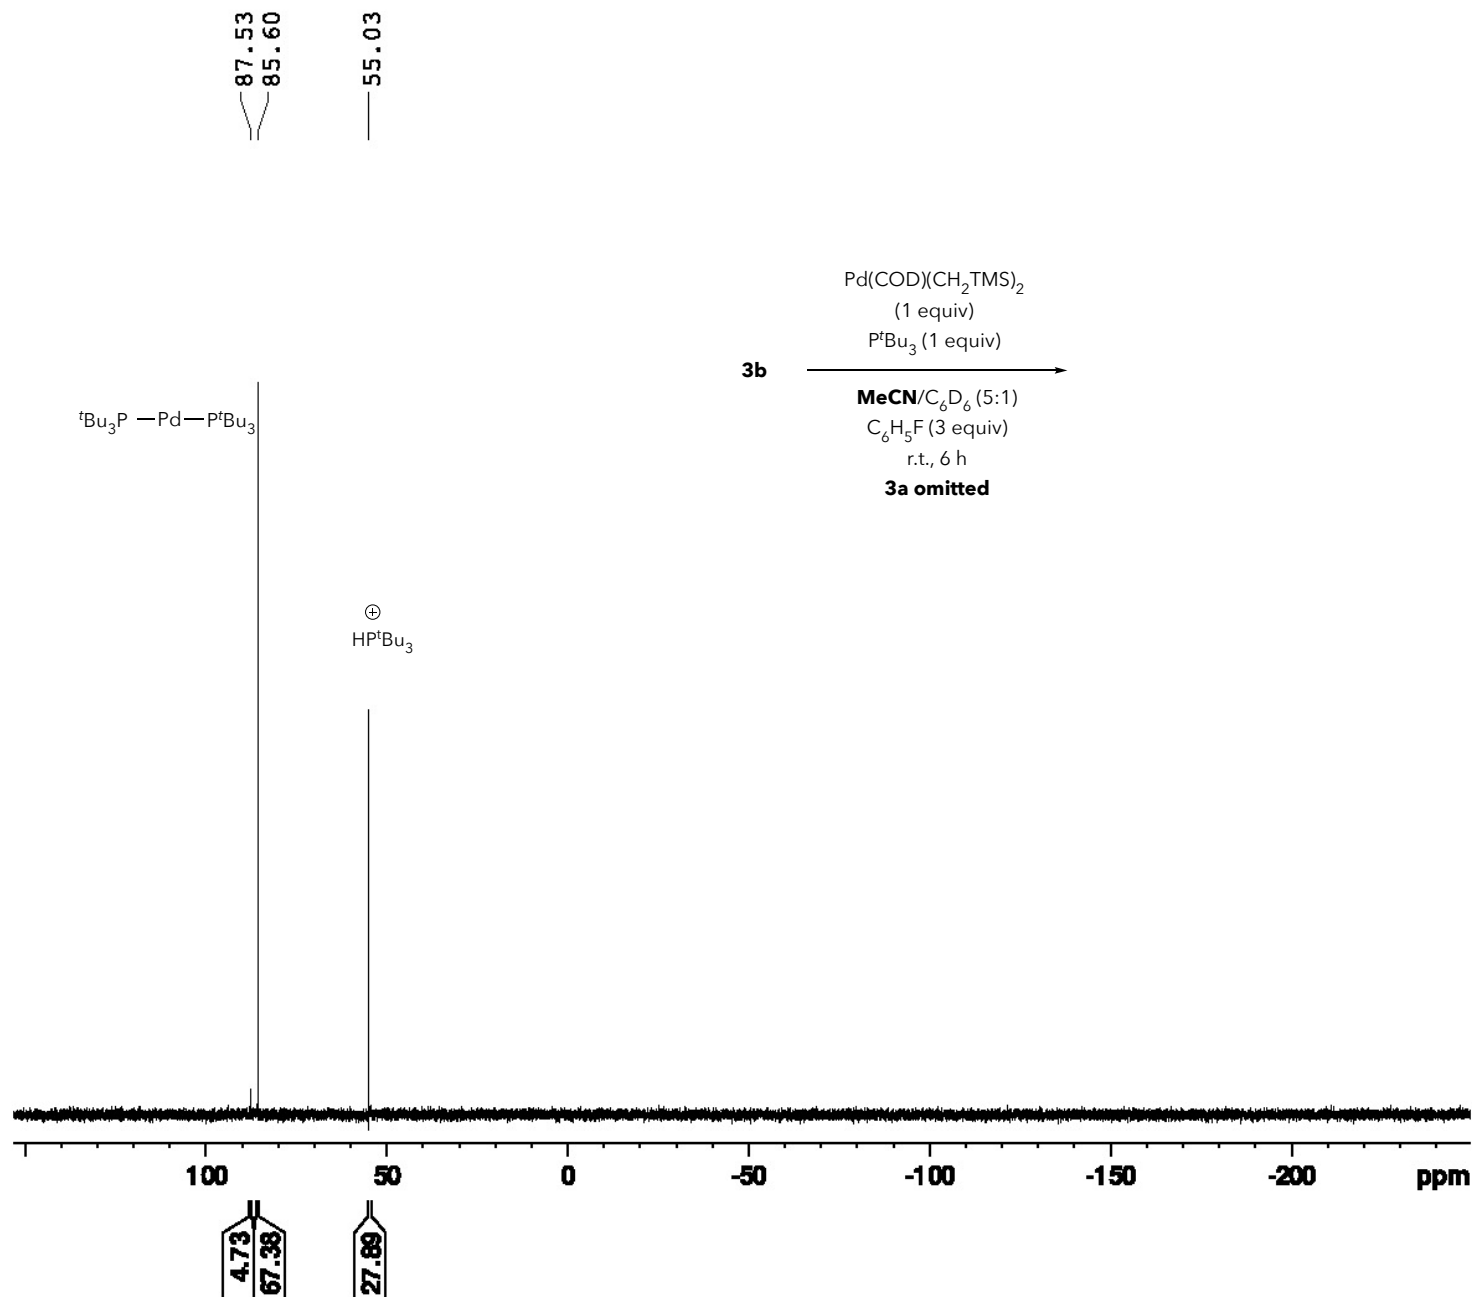

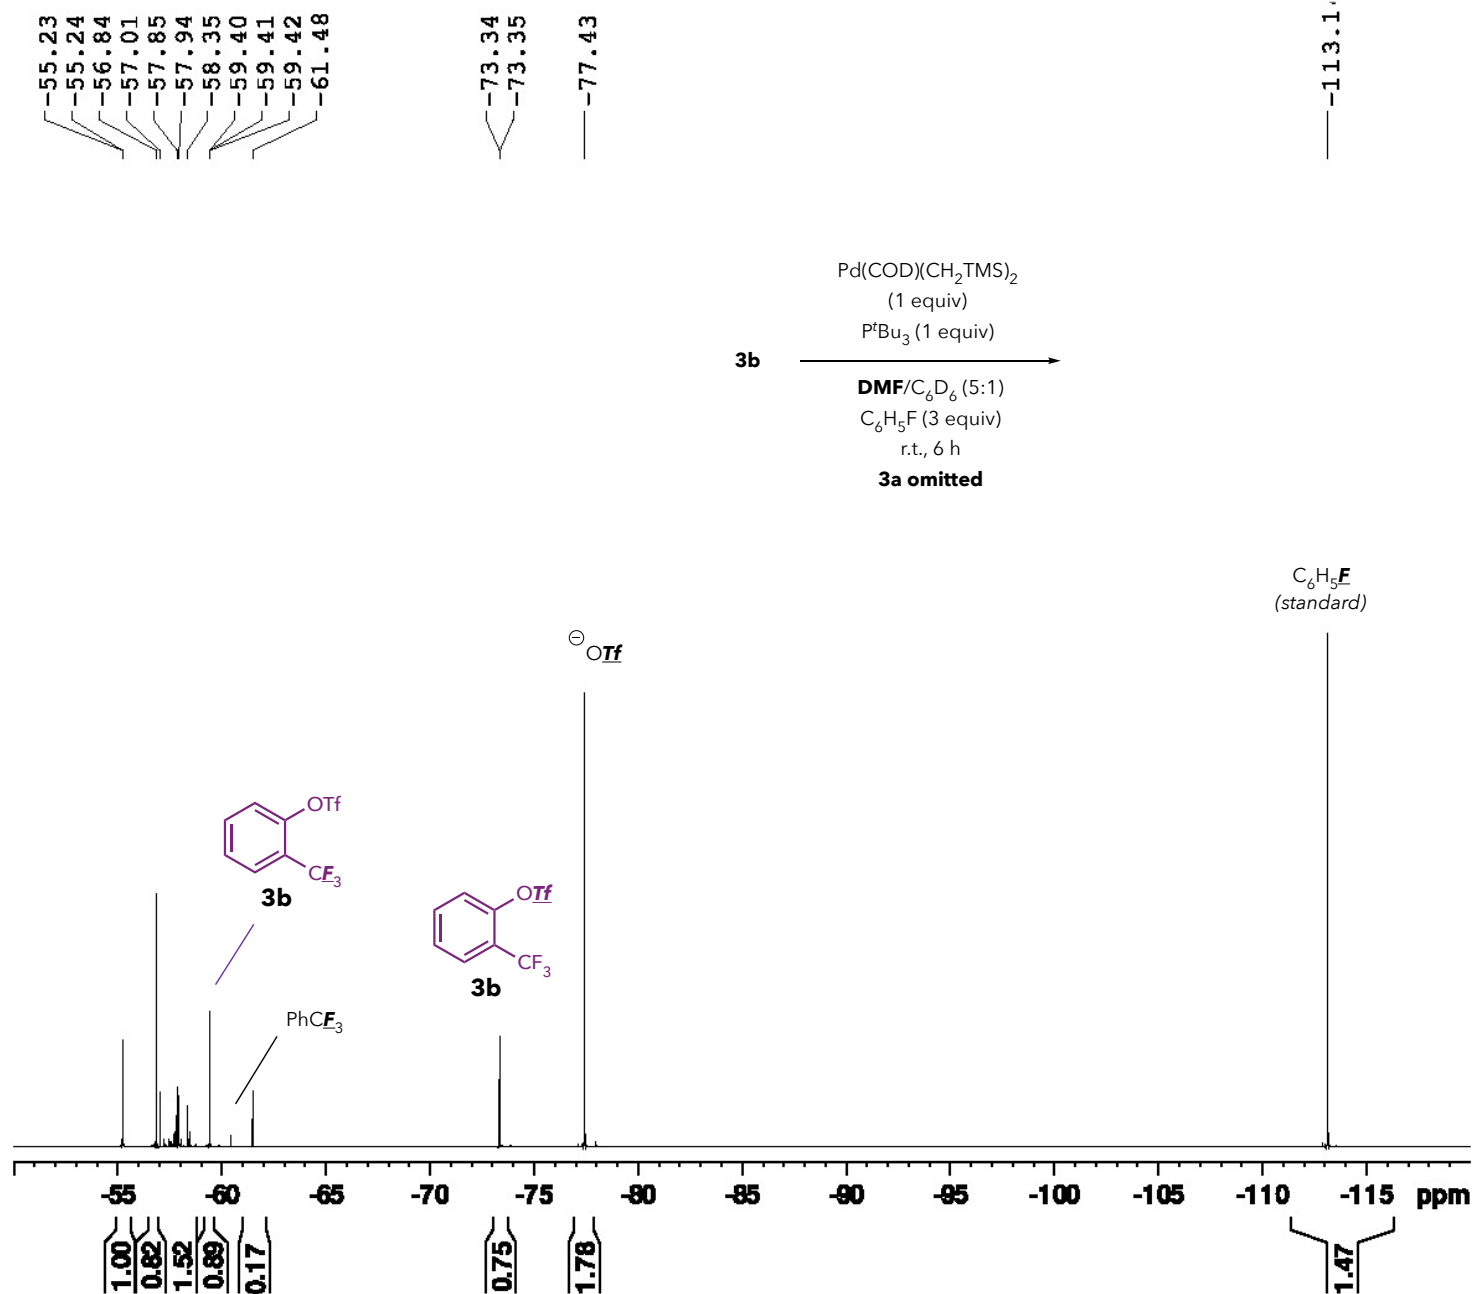

Current Data Parameters  
NAME 6-SMR-40-7  
EXPNO 10  
PROCNO 2

F2 - Acquisition Parameter  
Date\_ 20211115  
Time 18.00 h  
INSTRUM Avance Neo  
PROBHD Z152088\_0031 (  
PULPROG zgig  
TD 131072  
SOLVENT C6D6  
NS 16  
DS 4  
SWH 90909.094 Hz  
FIDRES 1.387163 Hz  
AQ 0.7208960 sec  
RG 101  
DW 5.500 usec  
DE 6.50 usec  
TE 298.1 K  
D1 1.00000000 sec  
D11 0.03000000 sec  
TD0 1  
SFO1 376.4607164 MHz  
NUC1 19F  
P1 12.00 usec  
PLW1 31.08900070 W  
SFO2 400.1316005 MHz  
NUC2 1H  
CPDPRG[2] waltz16  
PCPD2 90.00 usec  
PLW2 24.03499985 W  
PLW12 0.18990999 W

F2 - Processing parameters  
SI 65536  
SF 376.4978961 MHz  
WDW EM  
SSB 0  
LB 0.30 Hz  
GB 0  
PC 1.00

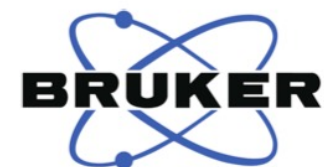

Current Data Parameters  
 NAME 6-SMR-40-7  
 EXPNO 11  
 PROCNO 1

F2 - Acquisition Parameter  
 Date\_ 20211115  
 Time 18.04 h  
 INSTRUM Avance Neo  
 PROBHD Z152088\_0031 (  
 PULPROG zgpg30  
 TD 65536  
 SOLVENT C6D6  
 NS 32  
 DS 4  
 SWH 65789.477 Hz  
 FIDRES 2.007735 Hz  
 AQ 0.4980736 sec  
 RG 101  
 DW 7.600 usec  
 DE 6.50 usec  
 TE 298.0 K  
 D1 2.00000000 sec  
 D11 0.03000000 sec  
 TD0 1  
 SFO1 161.9674942 MHz  
 NUC1 31P  
 P0 2.67 usec  
 P1 8.00 usec  
 PLW1 45.86100006 W  
 SFO2 400.1316005 MHz  
 NUC2 1H  
 CPDPRG[2] waltz16  
 PCPD2 90.00 usec  
 PLW2 24.03499985 W  
 PLW12 0.18990999 W  
 PLW13 0.09552100 W

F2 - Processing parameters  
 SI 32768  
 SF 161.9755930 MHz  
 WDW EM  
 SSB 0  
 LB 1.00 Hz  
 GB 0  
 PC 1.40

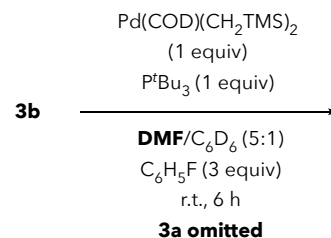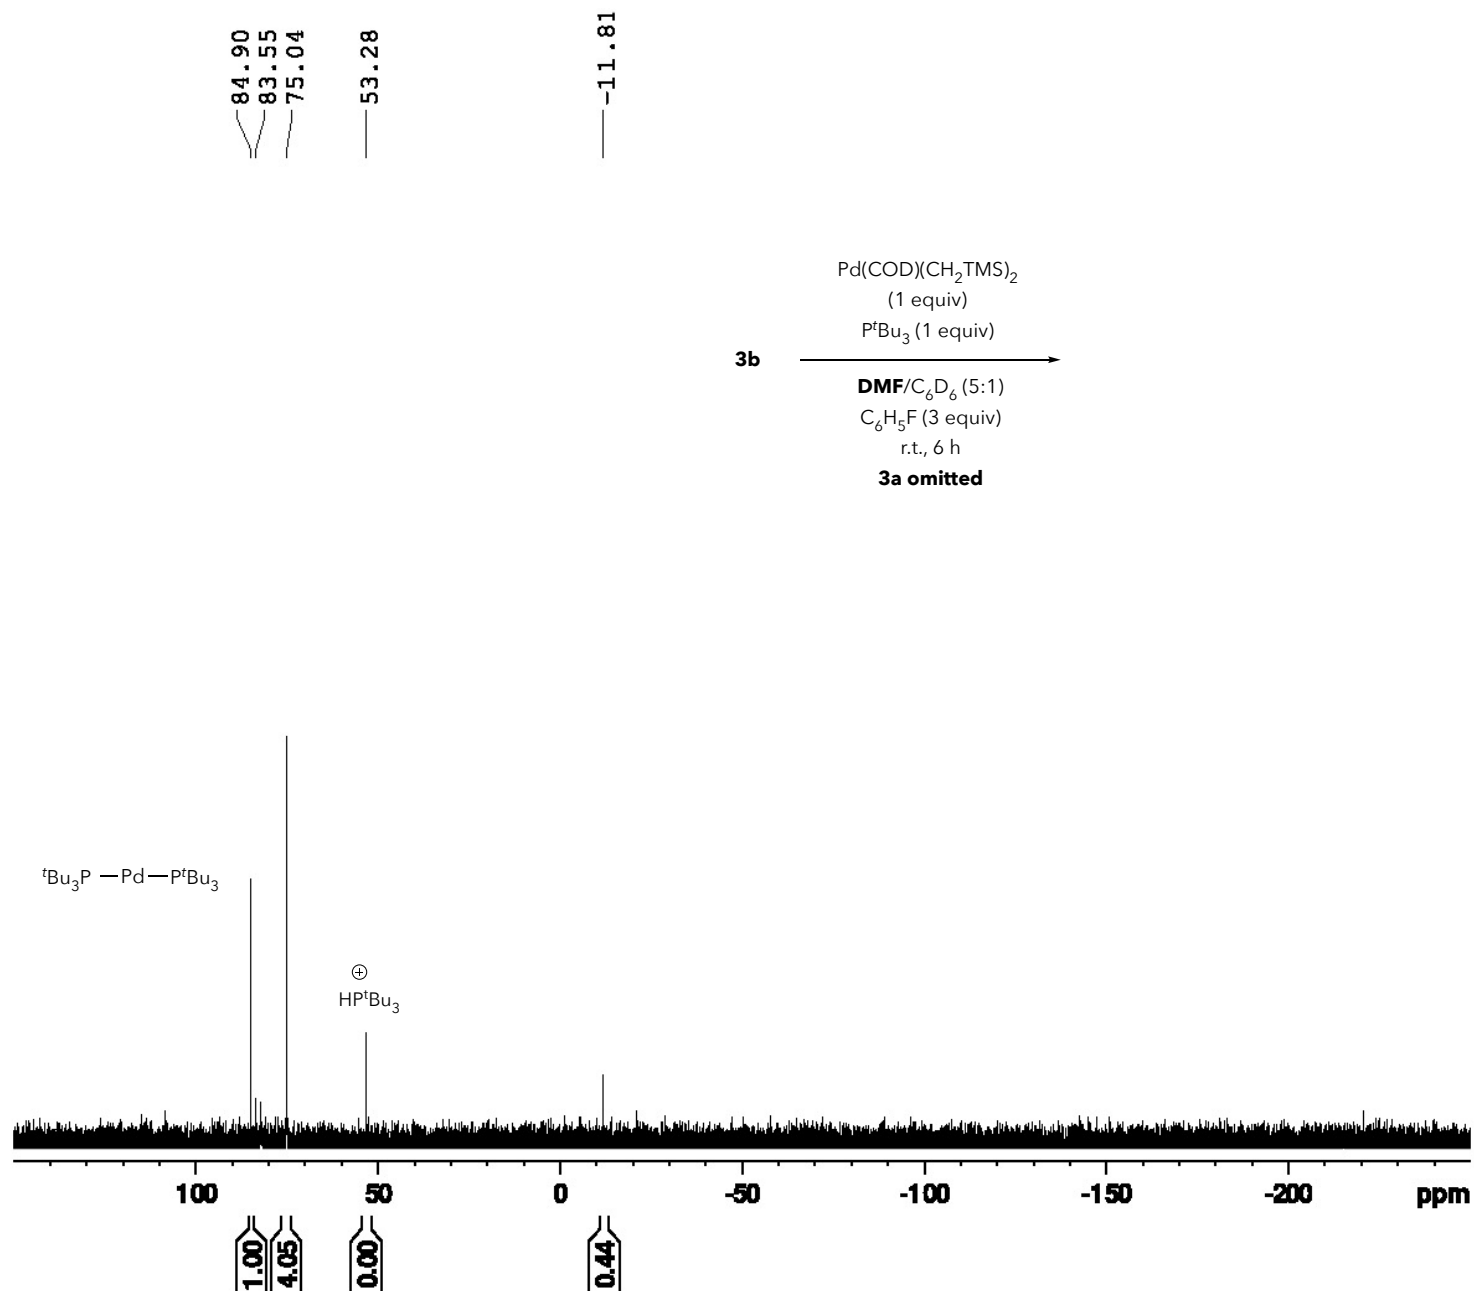

## 2. Experiments in DMF at 100 and 0 °C

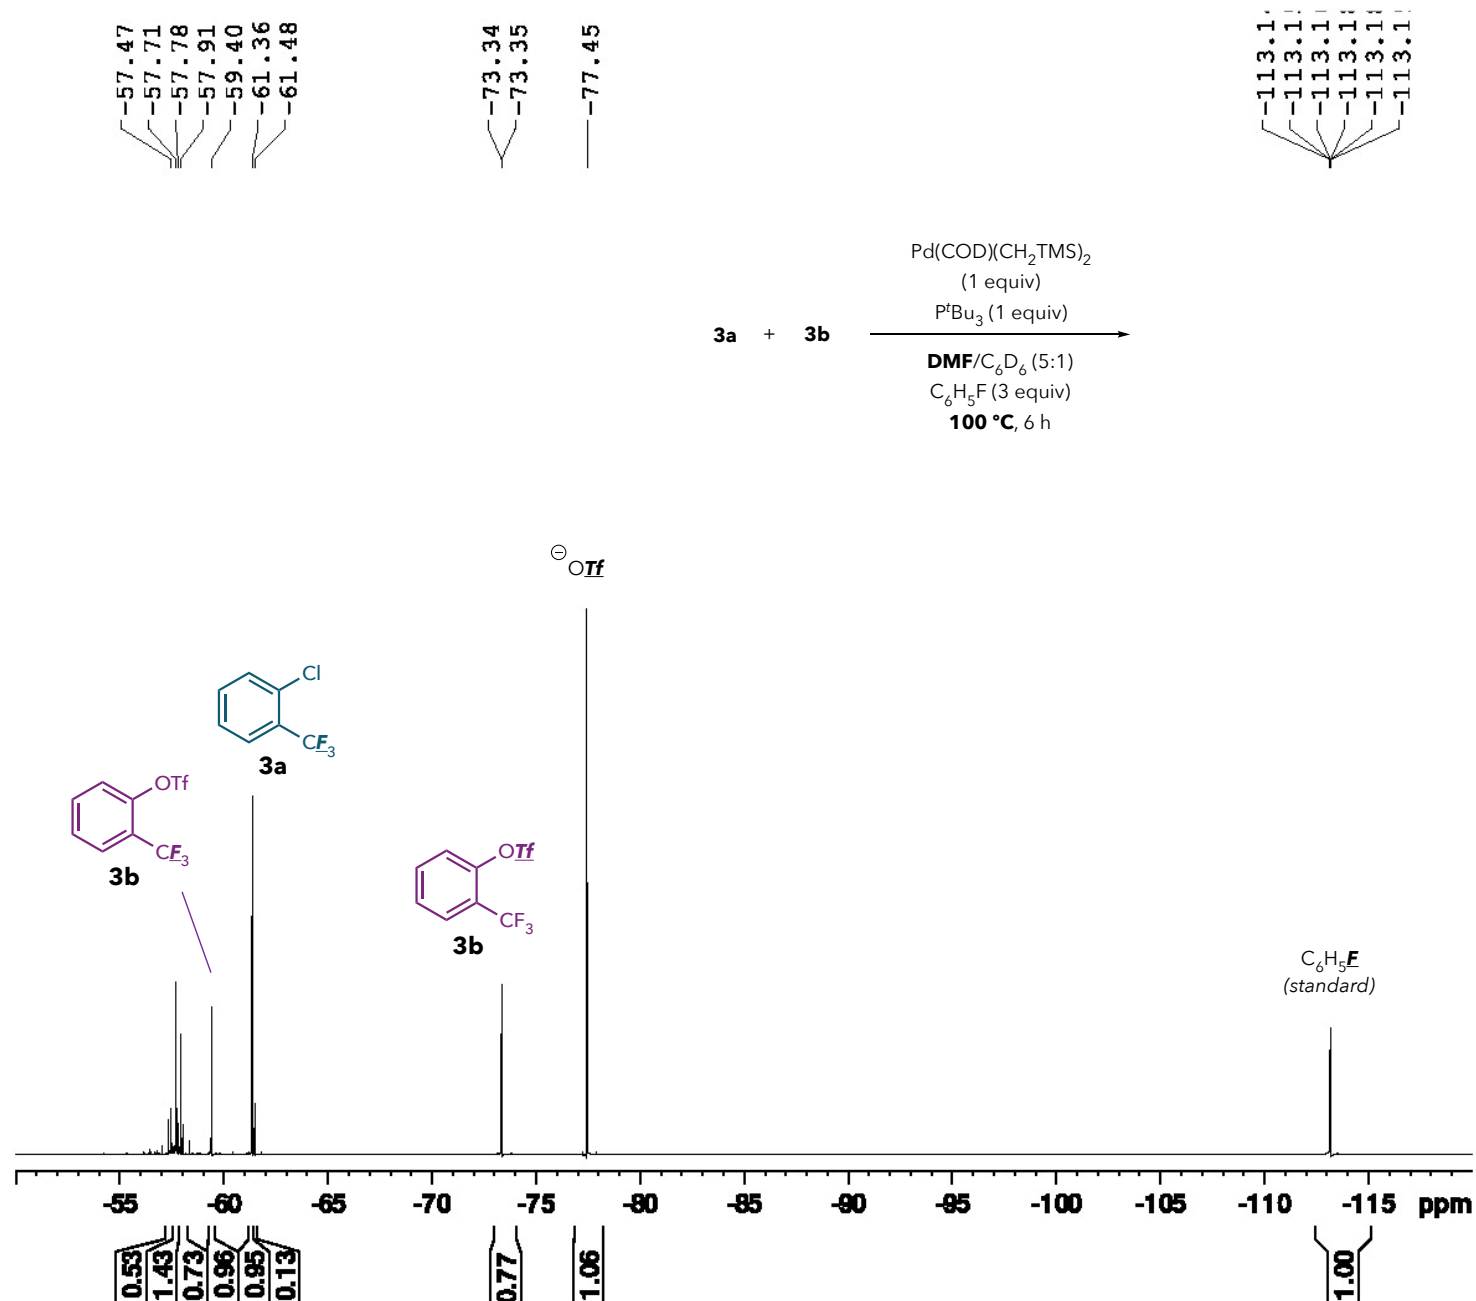

Current Data Parameters  
NAME 6-SMR-42-3  
EXPNO 11  
PROCNO 2

F2 - Acquisition Parameter  
Date\_ 20211116  
Time 16.56 h  
INSTRUM spect  
PROBHD Z125869\_0055 (  
PULPROG zgflgn  
TD 131072  
SOLVENT C6D6  
NS 16  
DS 4  
SWH 113636.367 Hz  
FIDRES 1.733953 Hz  
AQ 0.5767168 sec  
RG 15.61  
DW 4.400 usec  
DE 18.00 usec  
TE 298.0 K  
D1 1.00000000 sec  
TD0 1  
SFO1 470.6394024 MHz  
NUC1 19F  
P1 15.00 usec  
PLW1 11.70800018 W

F2 - Processing parameters  
SI 65536  
SF 470.6858765 MHz  
WDW EM  
SSB 0  
LB 0.30 Hz  
GB 0  
PC 1.00



Current Data Parameters  
 NAME 6-SMR-42-3  
 EXPNO 12  
 PROCNO 2

F2 - Acquisition Parameter  
 Date\_ 20211116  
 Time 16.58 h  
 INSTRUM spect  
 PROBHD Z125869\_0055 (  
 PULPROG zgpg30  
 TD 65536  
 SOLVENT C6D6  
 NS 16  
 DS 4  
 SWH 81521.742 Hz  
 FIDRES 2.487846 Hz  
 AQ 0.4019541 sec  
 RG 190.44  
 DW 6.133 usec  
 DE 18.00 usec  
 TE 298.0 K  
 D1 2.00000000 sec  
 D11 0.03000000 sec  
 TD0 1  
 SFO1 202.4866909 MHz  
 NUC1 31P  
 P0 4.00 usec  
 P1 12.00 usec  
 PLW1 40.26200104 W  
 SFO2 500.2320009 MHz  
 NUC2 1H  
 CPDPRG[2] waltz16  
 PCPD2 80.00 usec  
 PLW2 11.44699955 W  
 PLW12 0.25756001 W  
 PLW13 0.12955000 W

F2 - Processing parameters  
 SI 32768  
 SF 202.4968157 MHz  
 WDW EM  
 SSB 0  
 LB 1.00 Hz  
 GB 0  
 PC 1.40

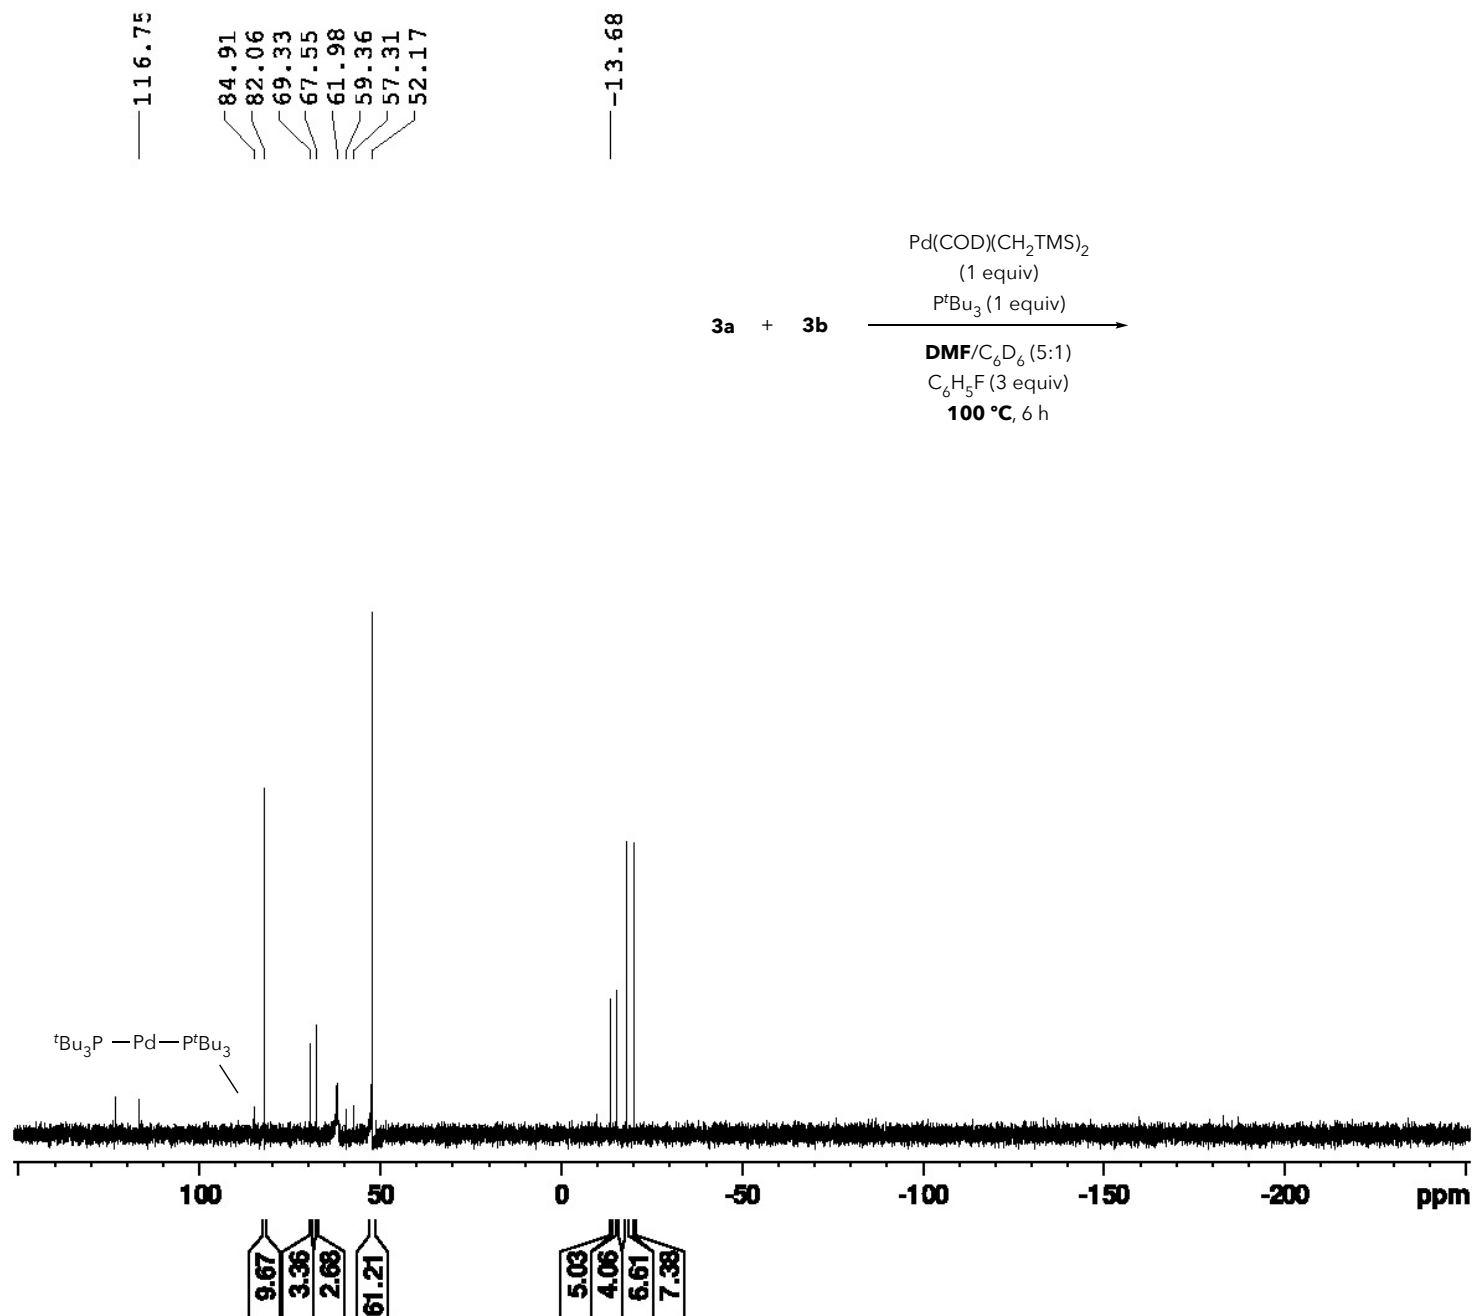

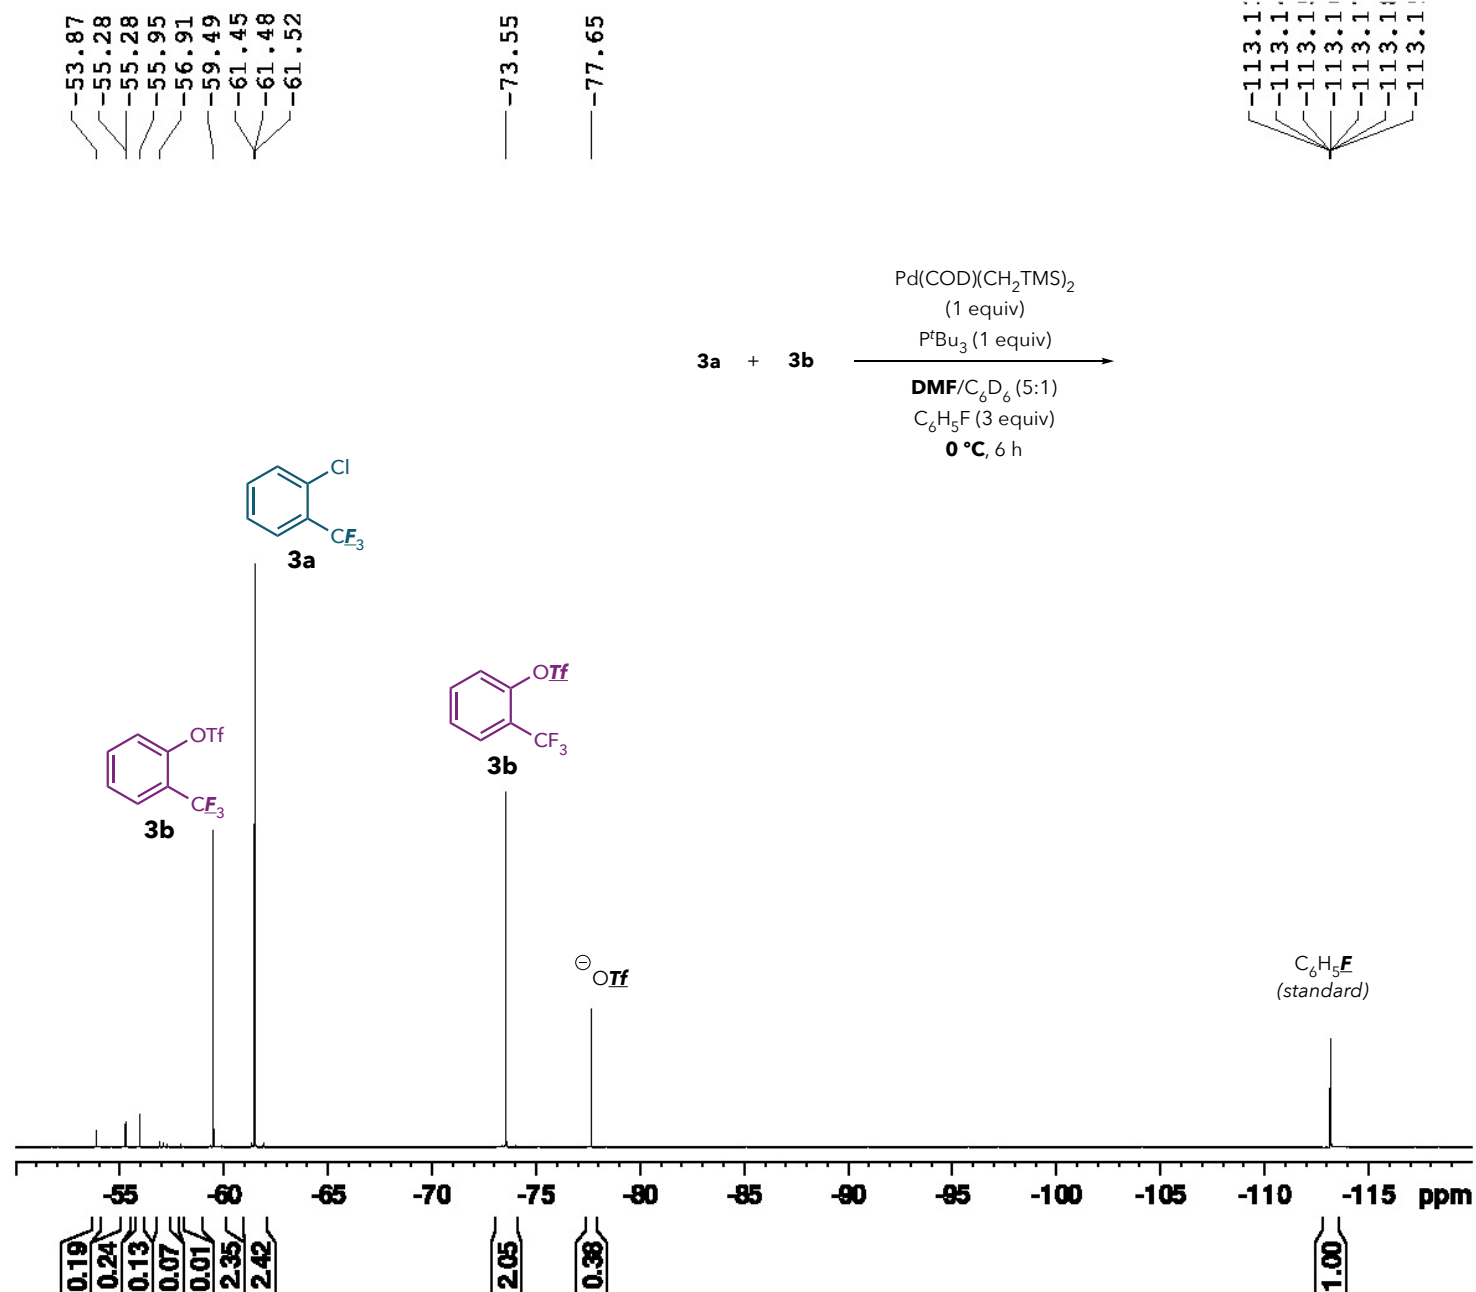

Current Data Parameters  
NAME 6-SMR-42-8  
EXPNO 11  
PROCNO 1

F2 - Acquisition Parameter  
Date\_ 20211117  
Time 15.39 h  
INSTRUM spect  
PROBHD Z125869\_0055 (  
PULPROG zgflgn  
TD 131072  
SOLVENT C6D6  
NS 16  
DS 4  
SWH 113636.367 Hz  
FIDRES 1.733953 Hz  
AQ 0.5767168 sec  
RG 15.61  
DW 4.400 usec  
DE 18.00 usec  
TE 273.0 K  
D1 1.00000000 sec  
TD0 1  
SFO1 470.6394024 MHz  
NUC1 19F  
P1 15.00 usec  
PLW1 11.70800018 W

F2 - Processing parameters  
SI 65536  
SF 470.6859023 MHz  
WDW EM  
SSB 0  
LB 0.30 Hz  
GB 0  
PC 1.00

84.01  
73.72  
63.15

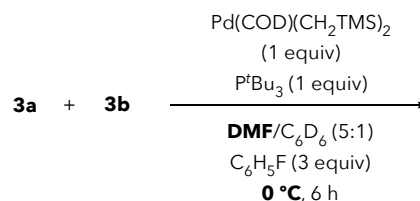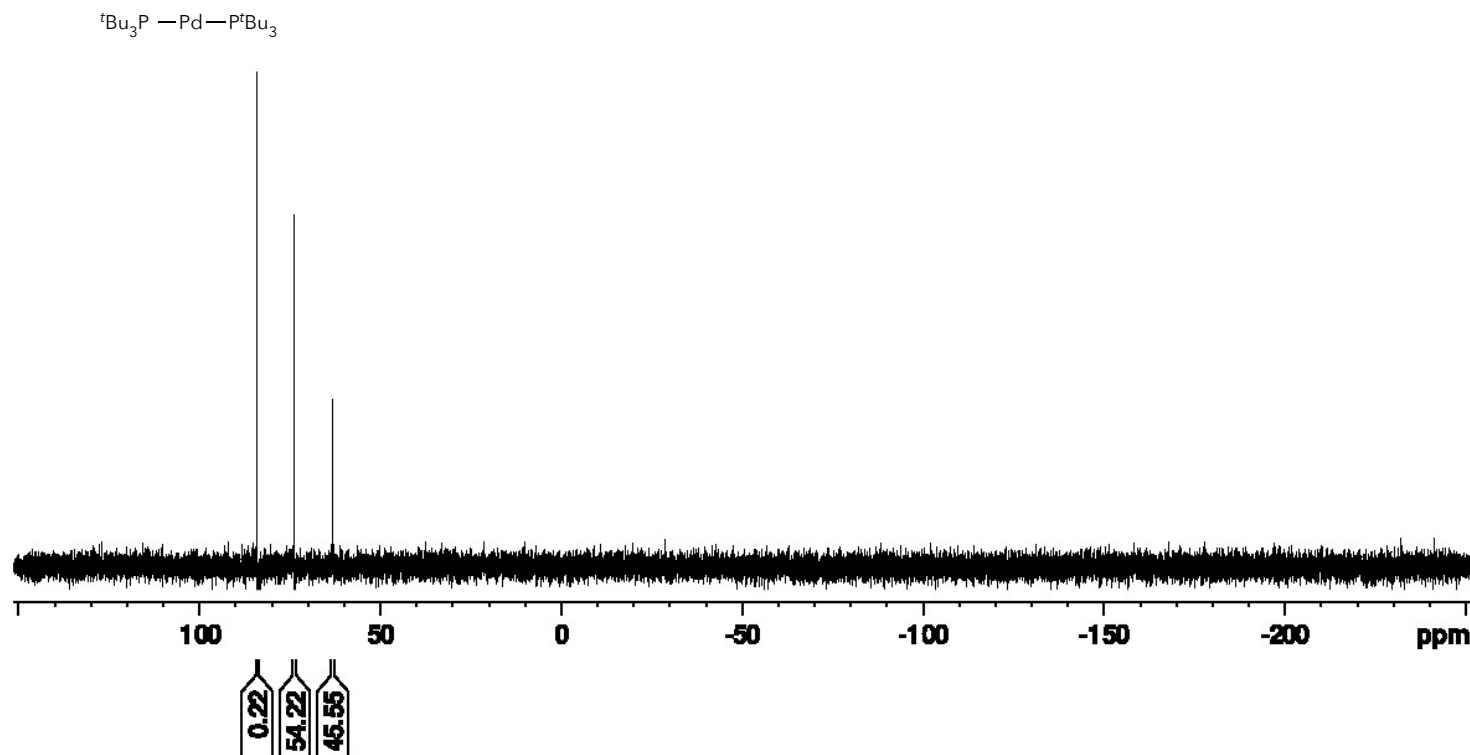

Current Data Parameters  
NAME 6-SMR-42-8  
EXPNO 10  
PROCNO 1

F2 - Acquisition Parameter  
Date\_ 20211117  
Time 15.37 h  
INSTRUM spect  
PROBHD Z125869\_0055 (  
PULPROG zgpg30  
TD 65536  
SOLVENT C6D6  
NS 16  
DS 4  
SWH 81521.742 Hz  
FIDRES 2.487846 Hz  
AQ 0.4019541 sec  
RG 190.44  
DW 6.133 usec  
DE 18.00 usec  
TE 273.0 K  
D1 2.00000000 sec  
D11 0.03000000 sec  
TD0 1  
SFO1 202.4866909 MHz  
NUC1 31P  
P0 4.00 usec  
P1 12.00 usec  
PLW1 40.26200104 W  
SFO2 500.2320009 MHz  
NUC2 1H  
CPDPRG[2] waltz16  
PCPD2 80.00 usec  
PLW2 11.44699955 W  
PLW12 0.25756001 W  
PLW13 0.12955000 W

F2 - Processing parameters  
SI 32768  
SF 202.4968157 MHz  
WDW EM  
SSB 0  
LB 1.00 Hz  
GB 0  
PC 1.40

### 3. Monitoring the Reaction in DMF over Time

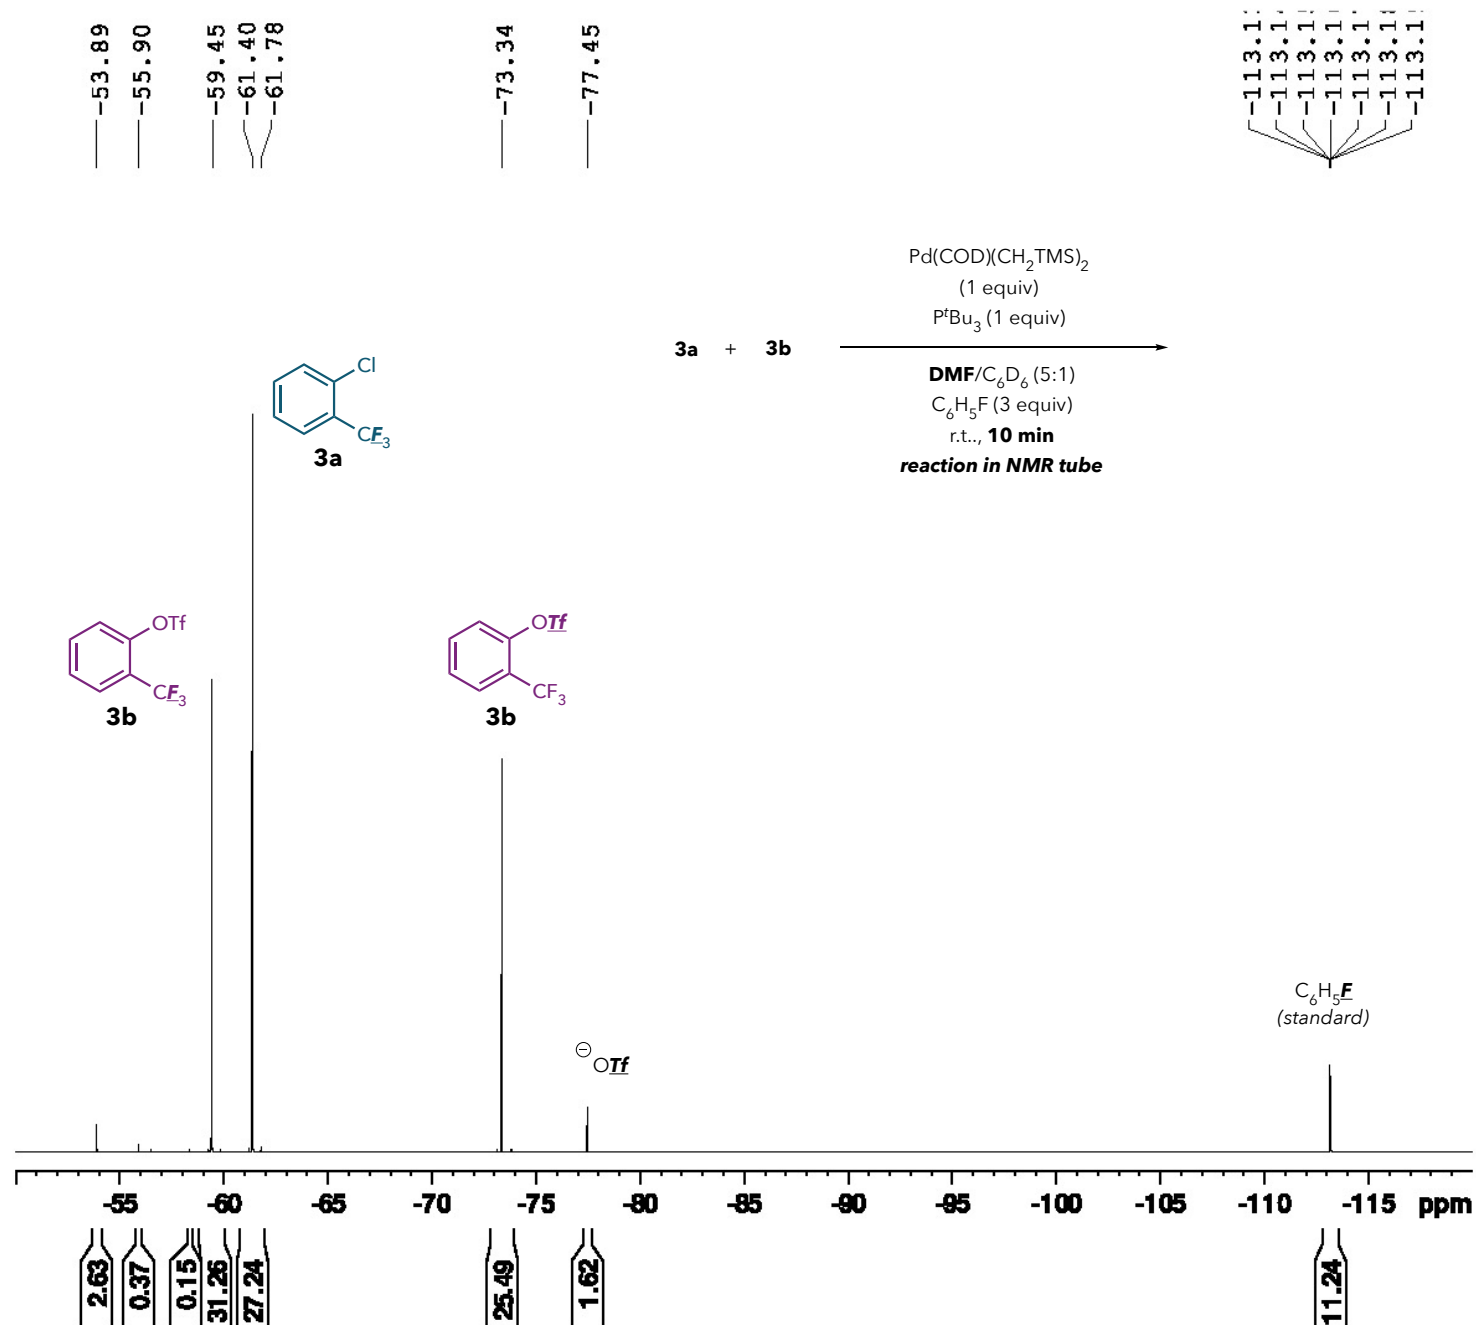

Current Data Parameters  
NAME 6-SMR-43-5min  
EXPNO 10  
PROCNO 2

F2 - Acquisition Parameter  
Date\_ 20211117  
Time 9.05 h  
INSTRUM spect  
PROBHD Z125869\_0055 (  
PULPROG zgflgn  
TD 131072  
SOLVENT C6D6  
NS 16  
DS 4  
SWH 113636.367 Hz  
FIDRES 1.733953 Hz  
AQ 0.5767168 sec  
RG 15.61  
DW 4.400 usec  
DE 18.00 usec  
TE 298.0 K  
D1 1.00000000 sec  
TD0 1  
SFO1 470.6394024 MHz  
NUC1 19F  
P1 15.00 usec  
PLW1 11.70800018 W

F2 - Processing parameters  
SI 65536  
SF 470.6858694 MHz  
WDW EM  
SSB 0  
LB 0.30 Hz  
GB 0  
PC 1.00



Current Data Parameters  
 NAME 6-SMR-43-5min  
 EXPNO 11  
 PROCNO 1

F2 - Acquisition Parameter  
 Date\_ 20211117  
 Time 9.09 h  
 INSTRUM spect  
 PROBHD Z125869\_0055 (  
 PULPROG zgpg30  
 TD 65536  
 SOLVENT C6D6  
 NS 16  
 DS 4  
 SWH 81521.742 Hz  
 FIDRES 2.487846 Hz  
 AQ 0.4019541 sec  
 RG 190.44  
 DW 6.133 usec  
 DE 18.00 usec  
 TE 298.0 K  
 D1 2.00000000 sec  
 D11 0.03000000 sec  
 TD0 1  
 SFO1 202.4866909 MHz  
 NUC1 31P  
 P0 4.00 usec  
 P1 12.00 usec  
 PLW1 40.26200104 W  
 SFO2 500.2320009 MHz  
 NUC2 1H  
 CPDPRG[2] waltz16  
 PCPD2 80.00 usec  
 PLW2 11.44699955 W  
 PLW12 0.25756001 W  
 PLW13 0.12955000 W

F2 - Processing parameters  
 SI 32768  
 SF 202.4968157 MHz  
 WDW EM  
 SSB 0  
 LB 1.00 Hz  
 GB 0  
 PC 1.40

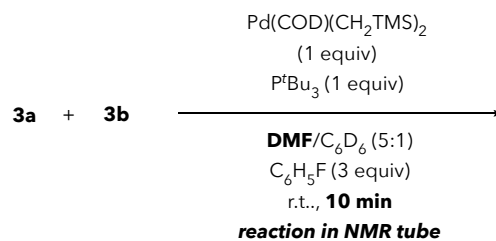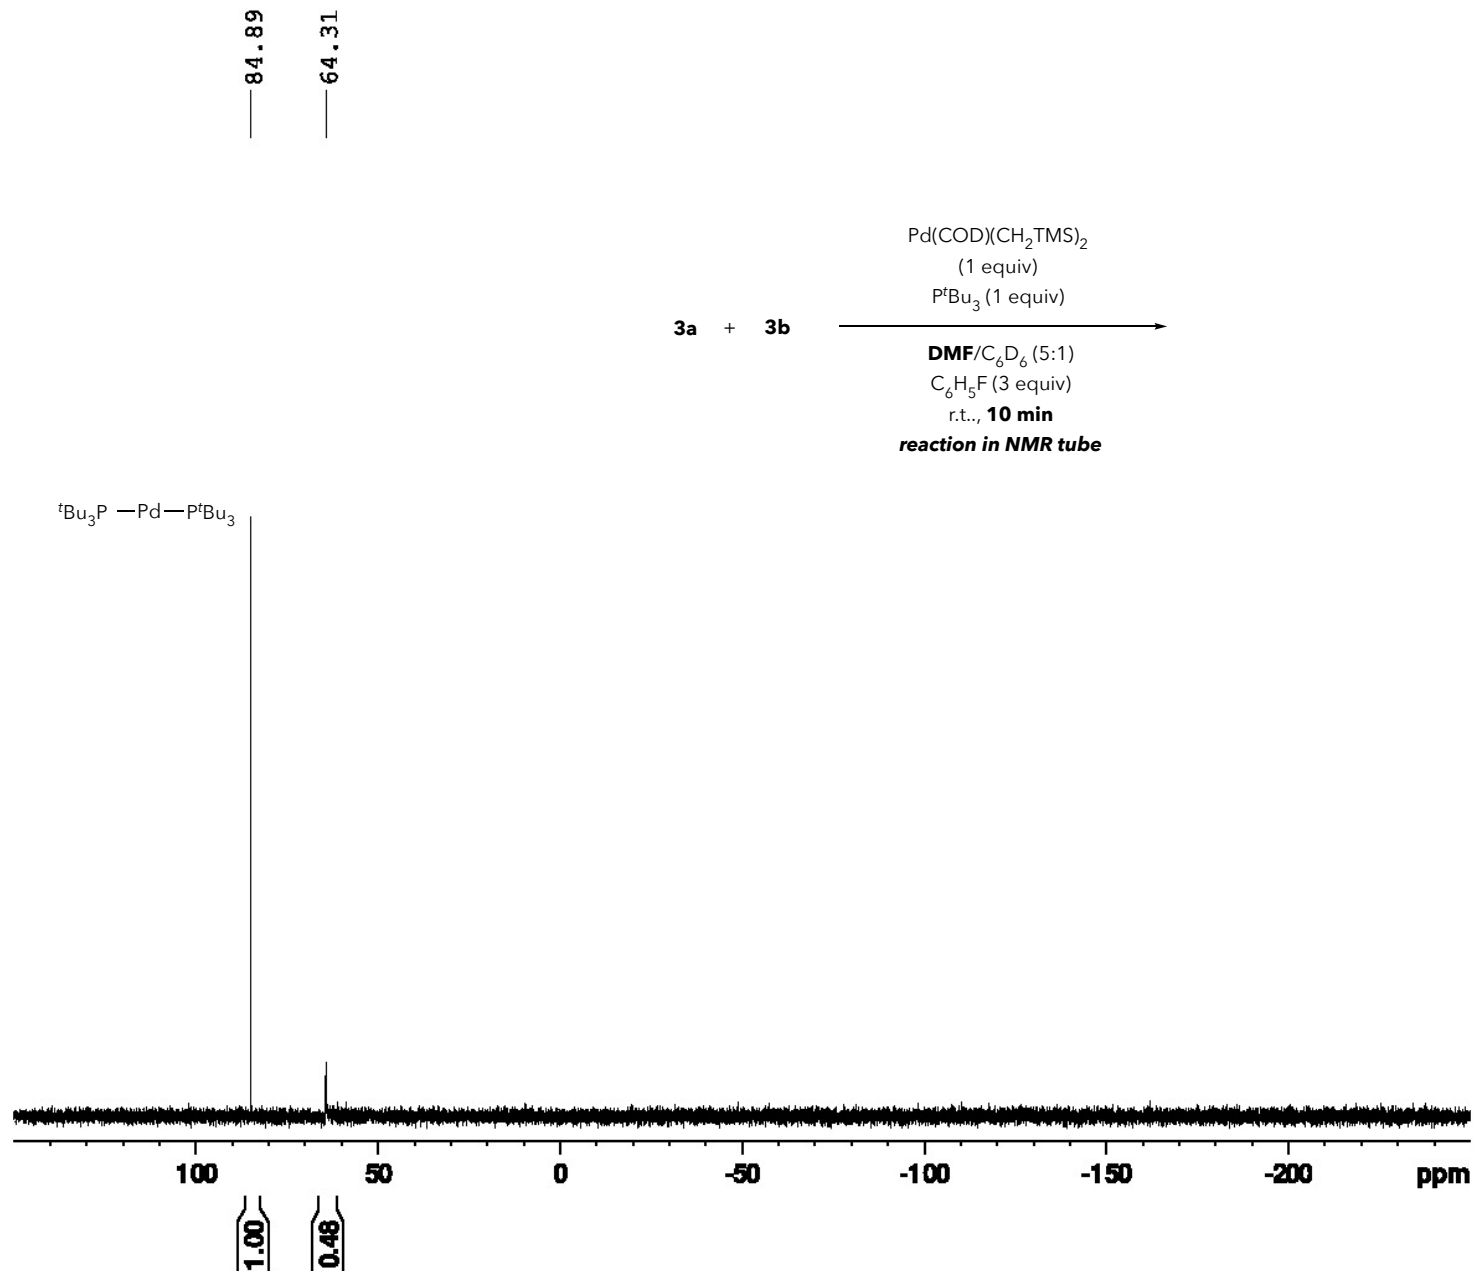

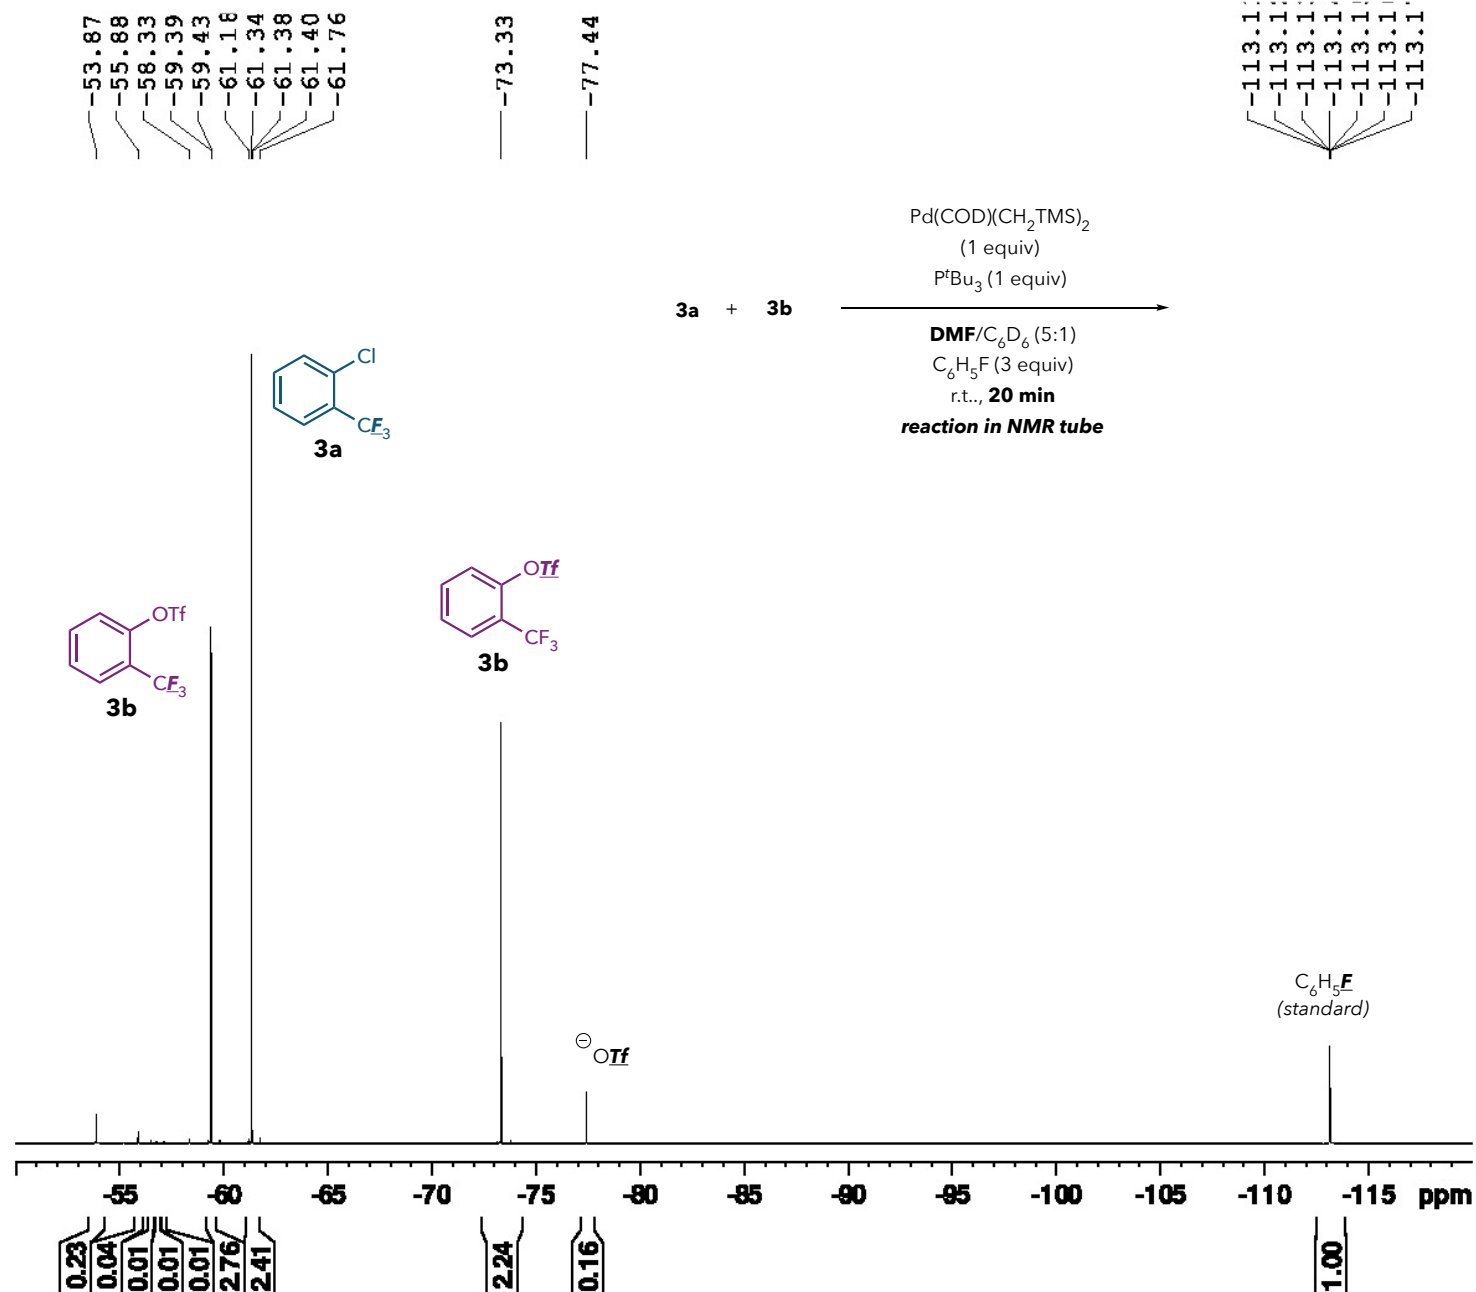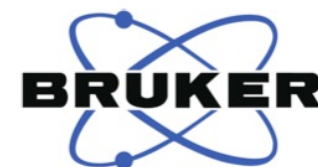

Current Data Parameters  
 NAME 6-SMR-43-10min  
 EXPNO 10  
 PROCNO 2

F2 - Acquisition Parameter  
 Date\_ 20211117  
 Time 9.12 h  
 INSTRUM spect  
 PROBHD Z125869\_0055 (  
 PULPROG zgflgn  
 TD 131072  
 SOLVENT C6D6  
 NS 16  
 DS 4  
 SWH 113636.367 Hz  
 FIDRES 1.733953 Hz  
 AQ 0.5767168 sec  
 RG 15.61  
 DW 4.400 usec  
 DE 18.00 usec  
 TE 298.0 K  
 D1 1.00000000 sec  
 TD0 1  
 SFO1 470.6394024 MHz  
 NUC1 19F  
 P1 15.00 usec  
 PLW1 11.70800018 W

F2 - Processing parameters  
 SI 65536  
 SF 470.6858608 MHz  
 WDW EM  
 SSB 0  
 LB 0.30 Hz  
 GB 0  
 PC 1.00



Current Data Parameters  
 NAME 6-SMR-43-10min  
 EXPNO 11  
 PROCNO 1

F2 - Acquisition Parameter  
 Date\_ 20211117  
 Time 9.17 h  
 INSTRUM spect  
 PROBHD Z125869\_0055 (  
 PULPROG zgpg30  
 TD 65536  
 SOLVENT C6D6  
 NS 16  
 DS 4  
 SWH 81521.742 Hz  
 FIDRES 2.487846 Hz  
 AQ 0.4019541 sec  
 RG 190.44  
 DW 6.133 usec  
 DE 18.00 usec  
 TE 298.0 K  
 D1 2.00000000 sec  
 D11 0.03000000 sec  
 TD0 1  
 SFO1 202.4866909 MHz  
 NUC1 31P  
 P0 4.00 usec  
 P1 12.00 usec  
 PLW1 40.26200104 W  
 SFO2 500.2320009 MHz  
 NUC2 1H  
 CPDPRG[2] waltz16  
 PCPD2 80.00 usec  
 PLW2 11.44699955 W  
 PLW12 0.25756001 W  
 PLW13 0.12955000 W

F2 - Processing parameters  
 SI 32768  
 SF 202.4968157 MHz  
 WDW EM  
 SSB 0  
 LB 1.00 Hz  
 GB 0  
 PC 1.40

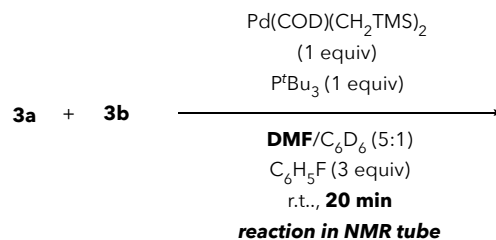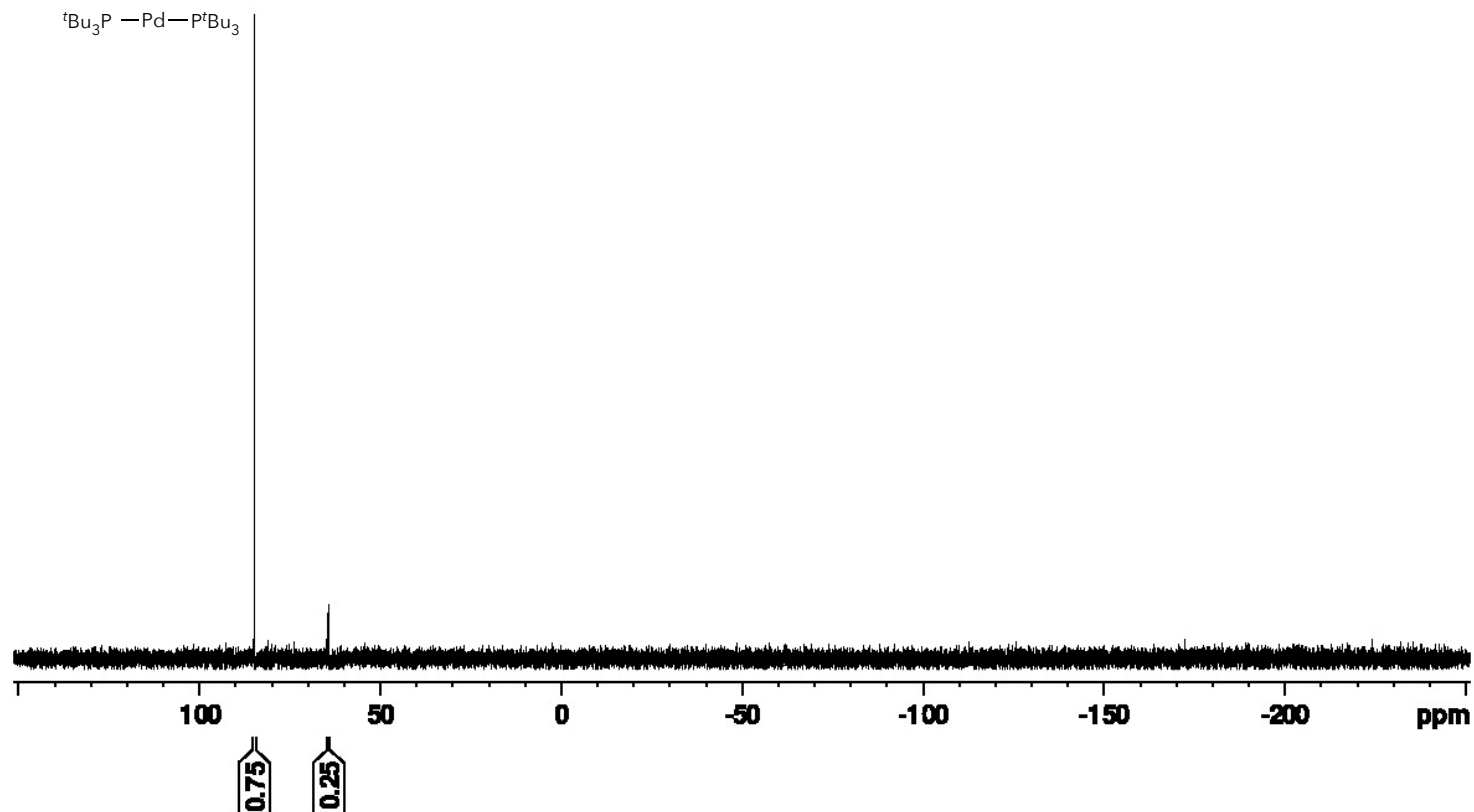

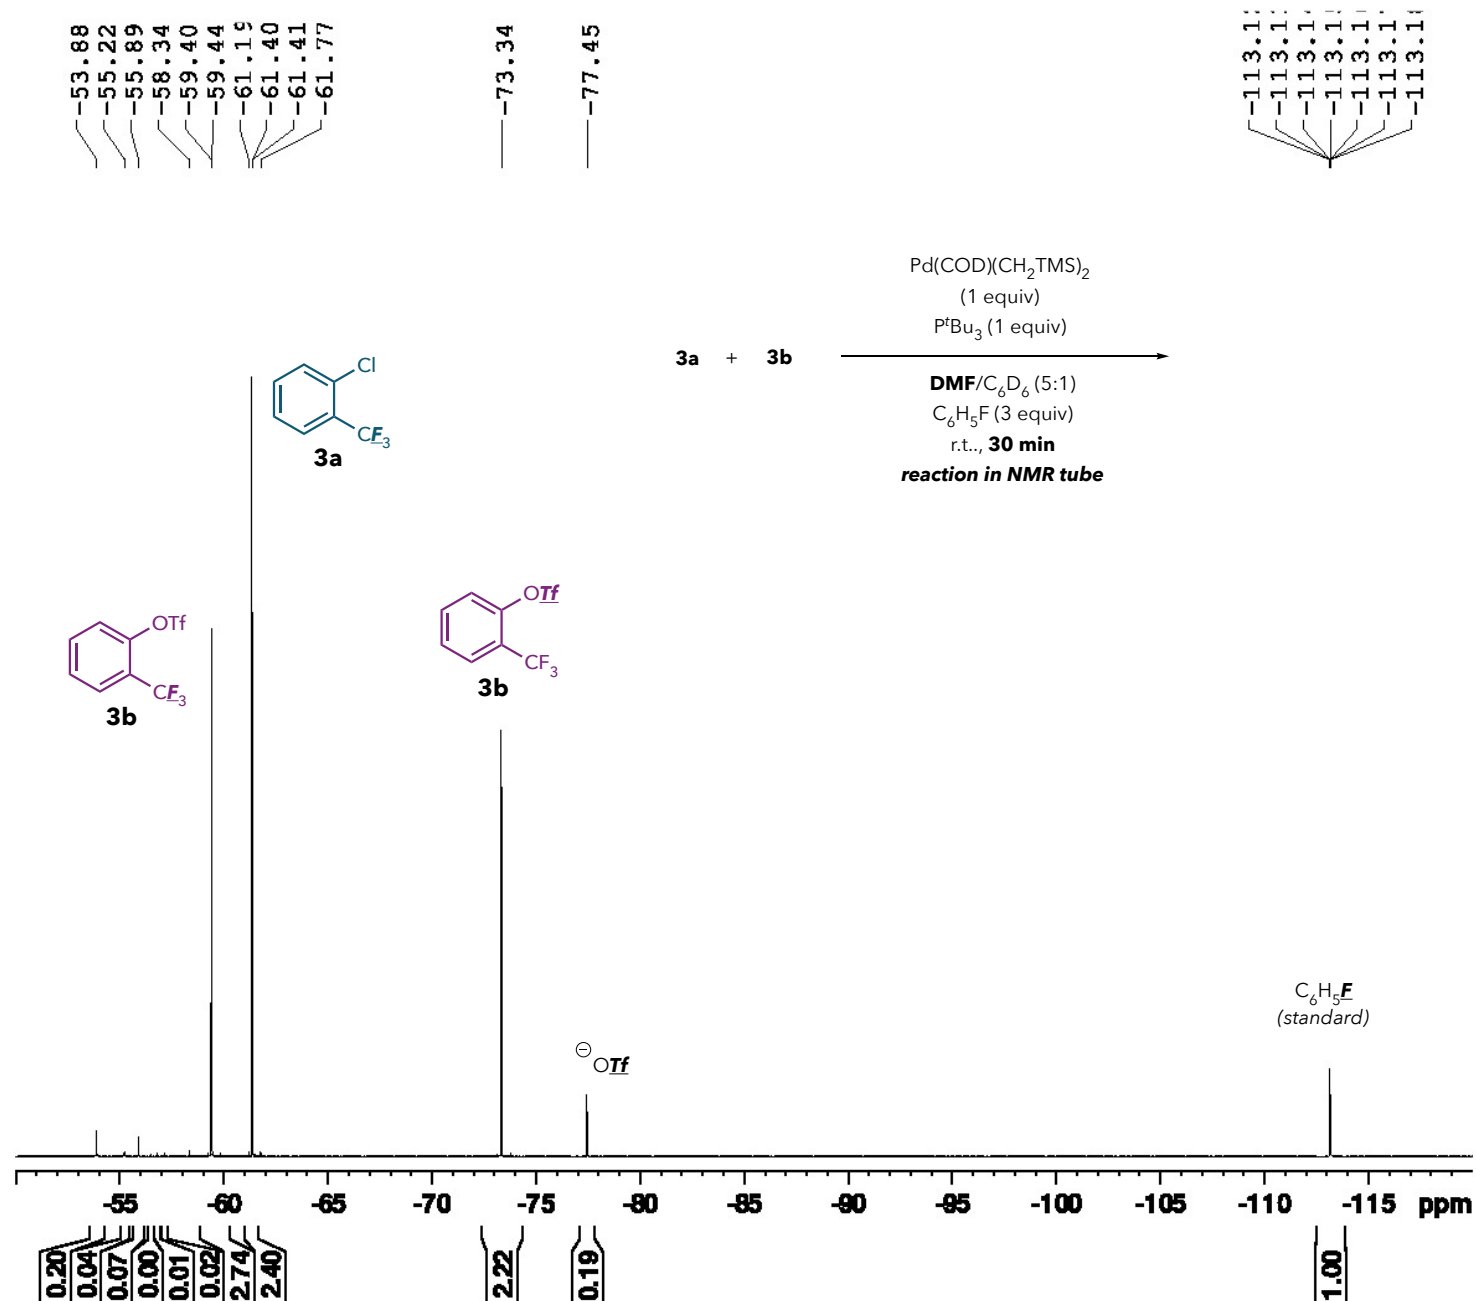

Current Data Parameters  
 NAME 6-SMR-43-30min  
 EXPNO 10  
 PROCNO 2

F2 - Acquisition Parameter  
 Date\_ 20211117  
 Time 9.26 h  
 INSTRUM spect  
 PROBHD Z125869\_0055 (  
 PULPROG zgfglqn  
 TD 131072  
 SOLVENT C6D6  
 NS 16  
 DS 4  
 SWH 113636.367 Hz  
 FIDRES 1.733953 Hz  
 AQ 0.5767168 sec  
 RG 15.61  
 DW 4.400 usec  
 DE 18.00 usec  
 TE 298.0 K  
 D1 1.00000000 sec  
 TD0 1  
 SFO1 470.6394024 MHz  
 NUC1 19F  
 P1 15.00 usec  
 PLW1 11.70800018 W

F2 - Processing parameters  
 SI 65536  
 SF 470.6858658 MHz  
 WDW EM  
 SSB 0  
 LB 0.30 Hz  
 GB 0  
 PC 1.00

84.90  
75.11  
64.37

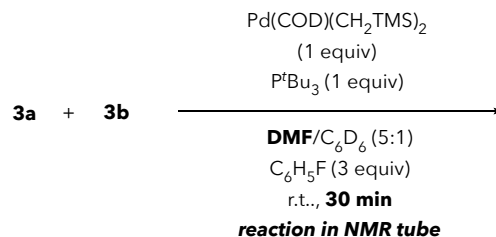

Current Data Parameters  
NAME 6-SMR-43-30min  
EXPNO 11  
PROCNO 1

F2 - Acquisition Parameter  
Date\_ 20211117  
Time 9.29 h  
INSTRUM spect  
PROBHD Z125869\_0055 (  
PULPROG zgpg30  
TD 65536  
SOLVENT C6D6  
NS 16  
DS 4  
SWH 81521.742 Hz  
FIDRES 2.487846 Hz  
AQ 0.4019541 sec  
RG 190.44  
DW 6.133 usec  
DE 18.00 usec  
TE 298.0 K  
D1 2.00000000 sec  
D11 0.03000000 sec  
TD0 1  
SFO1 202.4866909 MHz  
NUC1 31P  
P0 4.00 usec  
P1 12.00 usec  
PLW1 40.26200104 W  
SFO2 500.2320009 MHz  
NUC2 1H  
CPDPRG[2 waltz16  
PCPD2 80.00 usec  
PLW2 11.44699955 W  
PLW12 0.25756001 W  
PLW13 0.12955000 W

F2 - Processing parameters  
SI 32768  
SF 202.4968157 MHz  
WDW EM  
SSB 0  
LB 1.00 Hz  
GB 0  
PC 1.40

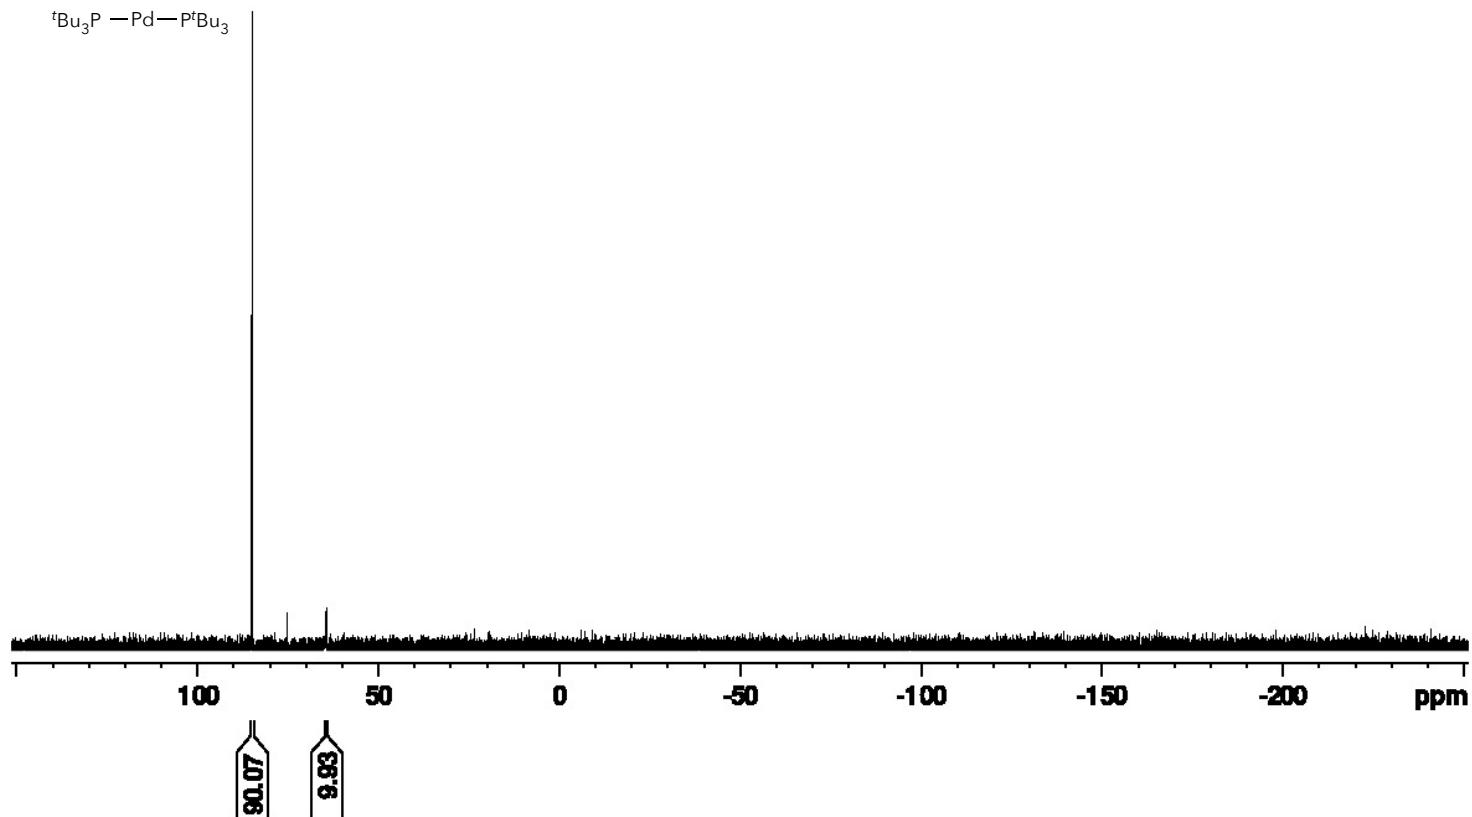

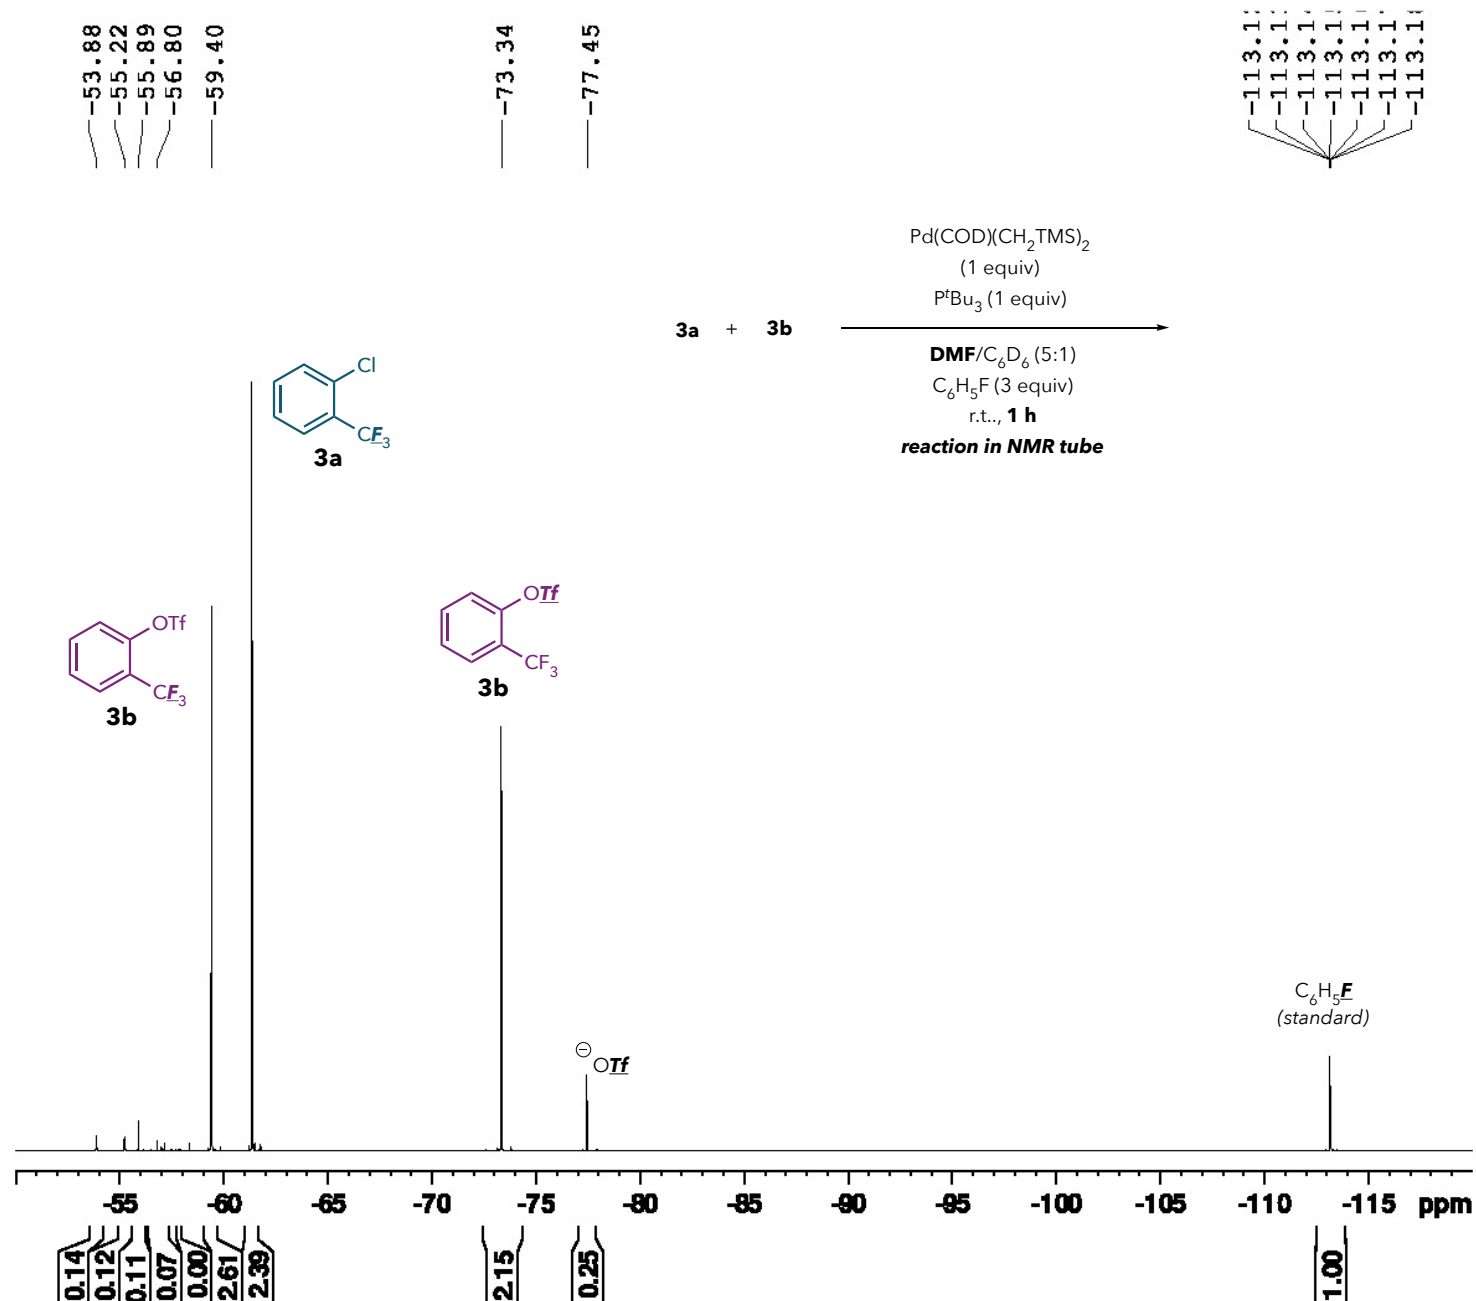

Current Data Parameters  
 NAME 6-SMR-43-1h  
 EXPNO 10  
 PROCNO 2

F2 - Acquisition Parameter  
 Date\_ 20211117  
 Time 9.56 h  
 INSTRUM spect  
 PROBHD Z125869\_0055 (  
 PULPROG zgpg30  
 TD 131072  
 SOLVENT C6D6  
 NS 16  
 DS 4  
 SWH 113636.367 Hz  
 FIDRES 1.733953 Hz  
 AQ 0.5767168 sec  
 RG 15.61  
 DW 4.400 usec  
 DE 18.00 usec  
 TE 298.0 K  
 D1 1.00000000 sec  
 TD0 1  
 SFO1 470.6394024 MHz  
 NUC1 19F  
 P1 15.00 usec  
 PLW1 11.70800018 W

F2 - Processing parameters  
 SI 65536  
 SF 470.6858656 MHz  
 WDW EM  
 SSB 0  
 LB 0.30 Hz  
 GB 0  
 PC 1.00

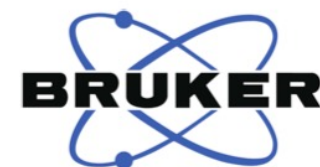

Current Data Parameters  
 NAME 6-SMR-43-1h  
 EXPNO 11  
 PROCNO 1

F2 - Acquisition Parameter  
 Date\_ 20211117  
 Time 9.59 h  
 INSTRUM spect  
 PROBHD Z125869\_0055 (  
 PULPROG zgpg30  
 TD 65536  
 SOLVENT C6D6  
 NS 16  
 DS 4  
 SWH 81521.742 Hz  
 FIDRES 2.487846 Hz  
 AQ 0.4019541 sec  
 RG 190.44  
 DW 6.133 usec  
 DE 18.00 usec  
 TE 298.0 K  
 D1 2.00000000 sec  
 D11 0.03000000 sec  
 TD0 1  
 SFO1 202.4866909 MHz  
 NUC1 31P  
 P0 4.00 usec  
 P1 12.00 usec  
 PLW1 40.26200104 W  
 SFO2 500.2320009 MHz  
 NUC2 1H  
 CPDPRG[2] waltz16  
 PCPD2 80.00 usec  
 PLW2 11.44699955 W  
 PLW12 0.25756001 W  
 PLW13 0.12955000 W

F2 - Processing parameters  
 SI 32768  
 SF 202.4968157 MHz  
 WDW EM  
 SSB 0  
 LB 1.00 Hz  
 GB 0  
 PC 1.40

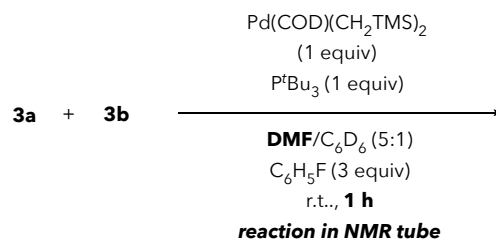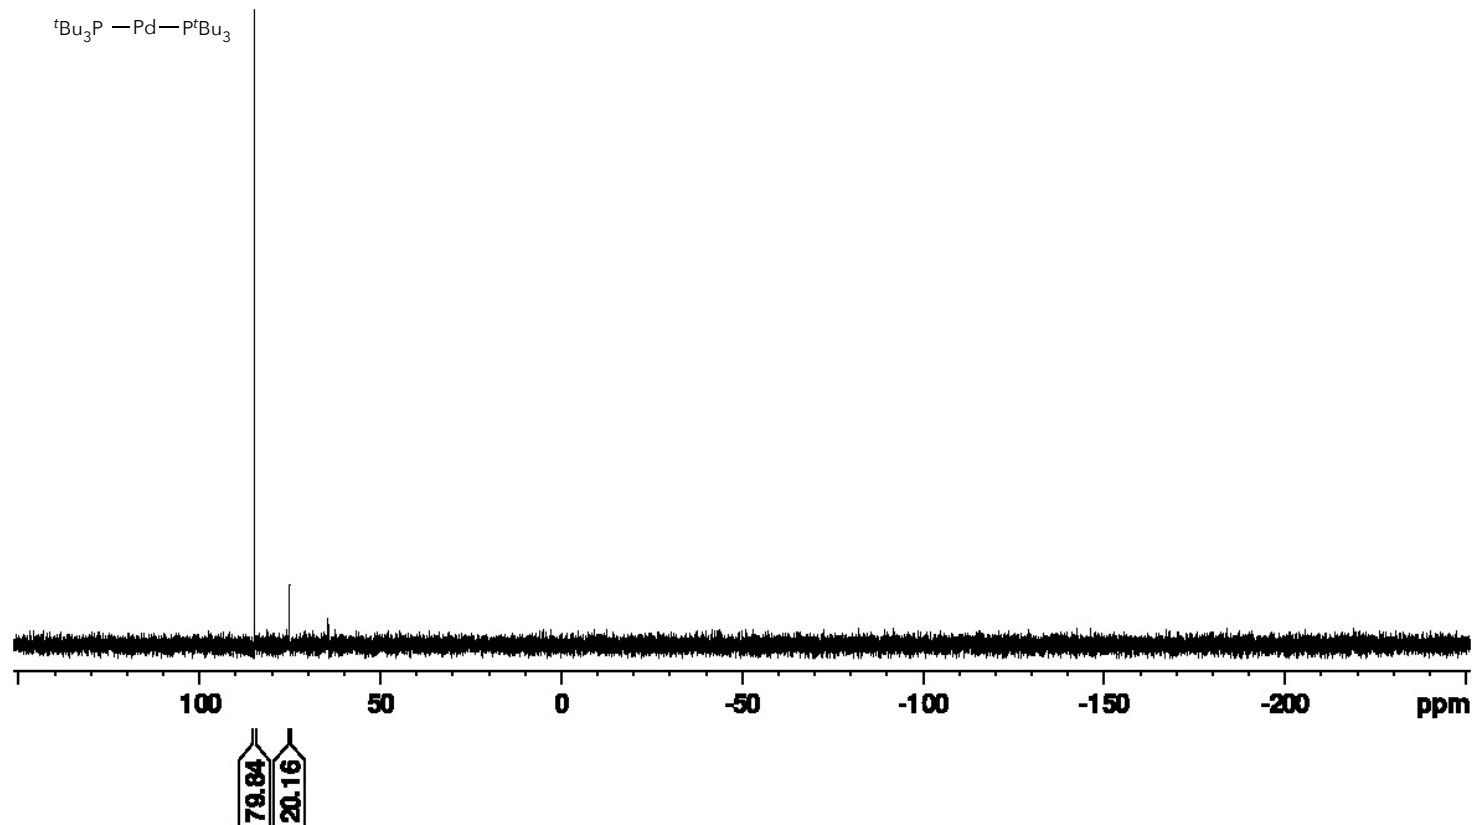

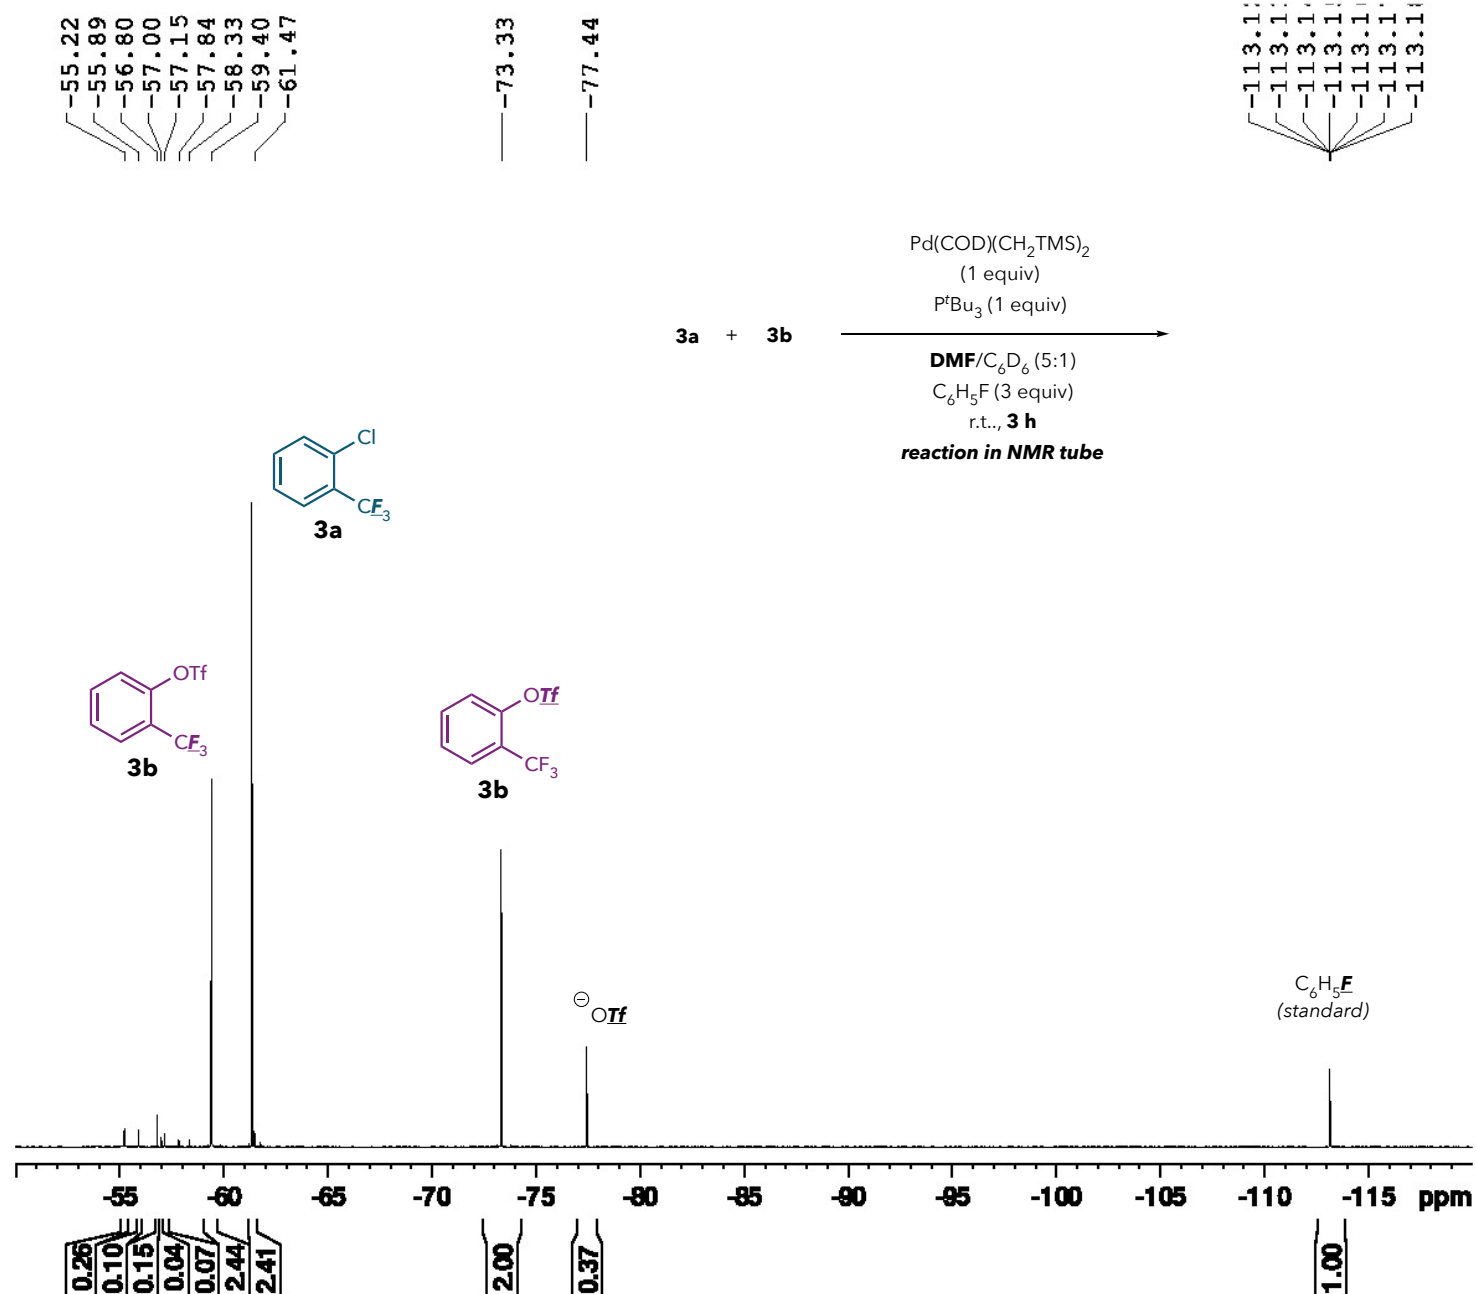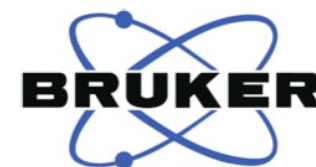

Current Data Parameters  
NAME 6-SMR-43-3h  
EXPNO 10  
PROCNO 2

F2 - Acquisition Parameter  
Date\_ 20211117  
Time 11.59 h  
INSTRUM spect  
PROBHD Z125869\_0055 (  
PULPROG zgflgn  
TD 131072  
SOLVENT C6D6  
NS 16  
DS 4  
SWH 113636.367 Hz  
FIDRES 1.733953 Hz  
AQ 0.5767168 sec  
RG 15.61  
DW 4.400 usec  
DE 18.00 usec  
TE 298.0 K  
D1 1.00000000 sec  
TD0 1  
SFO1 470.6394024 MHz  
NUC1 19F  
P1 15.00 usec  
PLW1 11.70800018 W

F2 - Processing parameters  
SI 65536  
SF 470.6858650 MHz  
WDW EM  
SSB 0  
LB 0.30 Hz  
GB 0  
PC 1.00

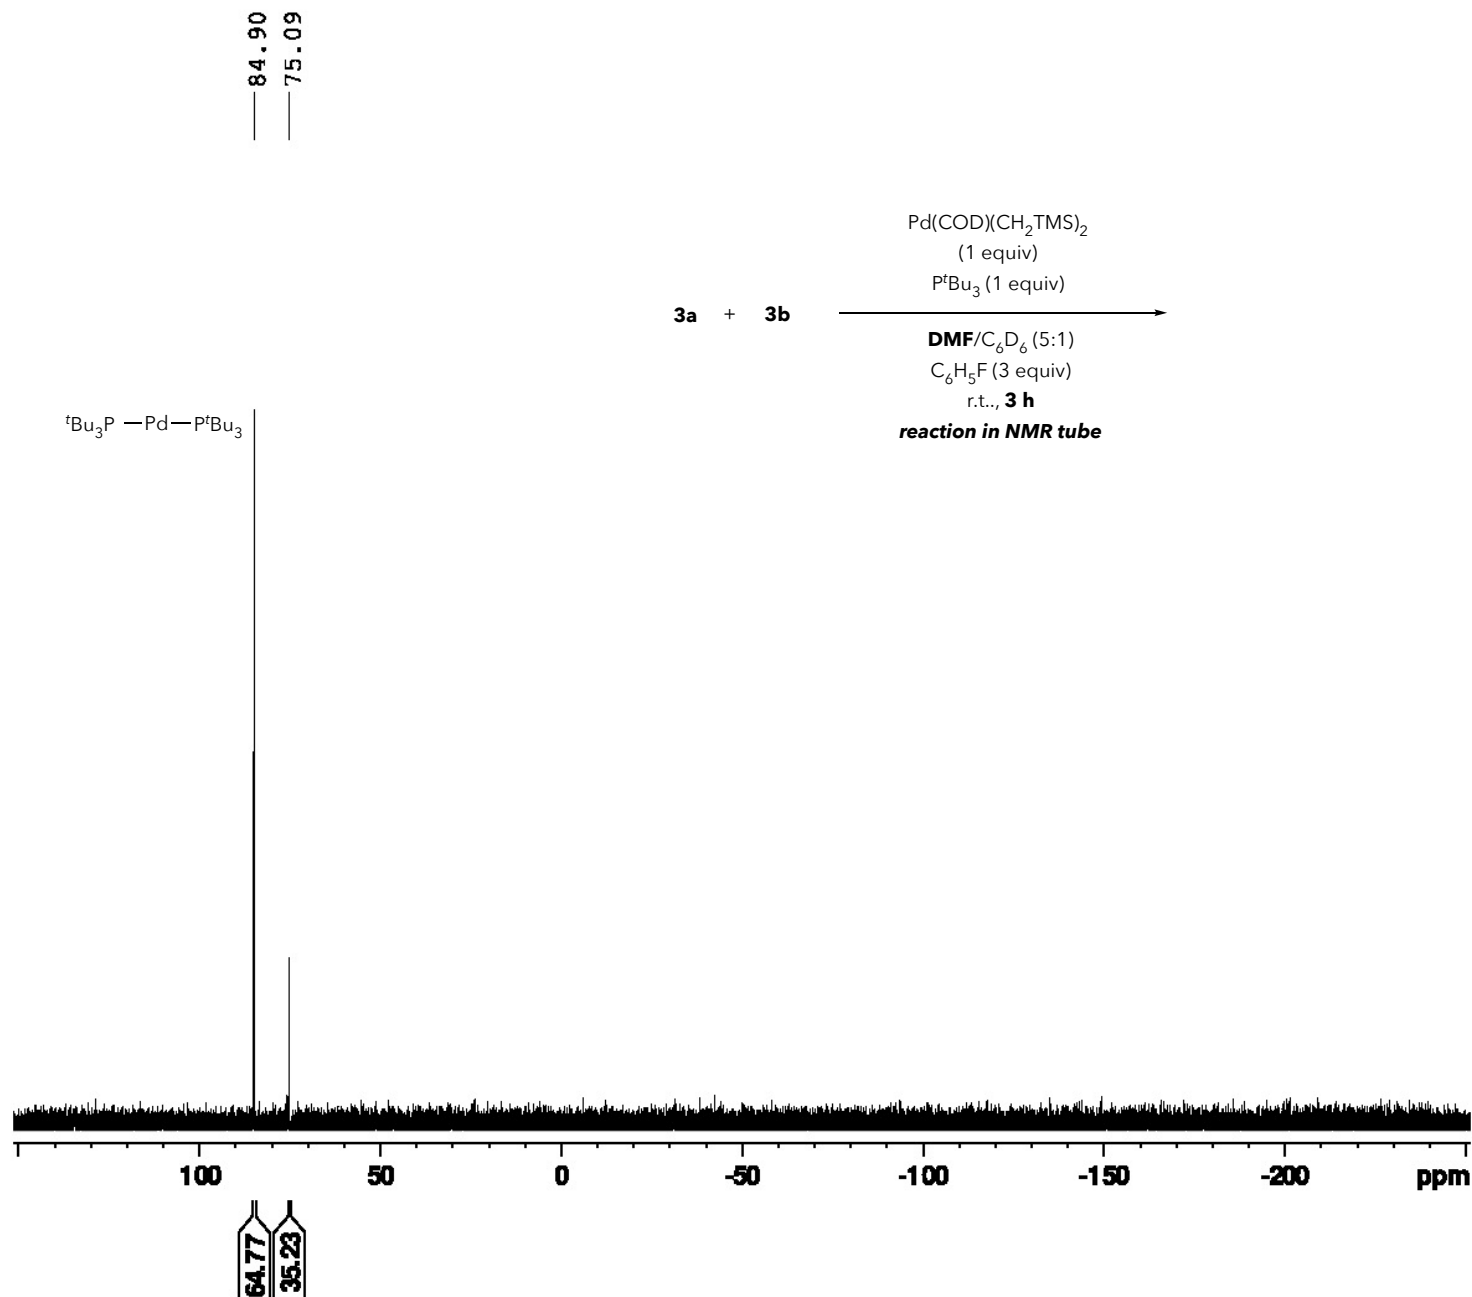

Current Data Parameters  
NAME 6-SMR-43-3h  
EXPNO 11  
PROCNO 1

F2 - Acquisition Parameter  
Date\_ 20211117  
Time 12.03 h  
INSTRUM spect  
PROBHD Z125869\_0055 (  
PULPROG zgpg30  
TD 65536  
SOLVENT C6D6  
NS 16  
DS 4  
SWH 81521.742 Hz  
FIDRES 2.487846 Hz  
AQ 0.4019541 sec  
RG 190.44  
DW 6.133 usec  
DE 18.00 usec  
TE 298.0 K  
D1 2.00000000 sec  
D11 0.03000000 sec  
TD0 1  
SFO1 202.4866909 MHz  
NUC1 31P  
P0 4.00 usec  
P1 12.00 usec  
PLW1 40.26200104 W  
SFO2 500.2320009 MHz  
NUC2 1H  
CPDPRG[2] waltz16  
PCPD2 80.00 usec  
PLW2 11.44699955 W  
PLW12 0.25756001 W  
PLW13 0.12955000 W

F2 - Processing parameters  
SI 32768  
SF 202.4968157 MHz  
WDW EM  
SSB 0  
LB 1.00 Hz  
GB 0  
PC 1.40

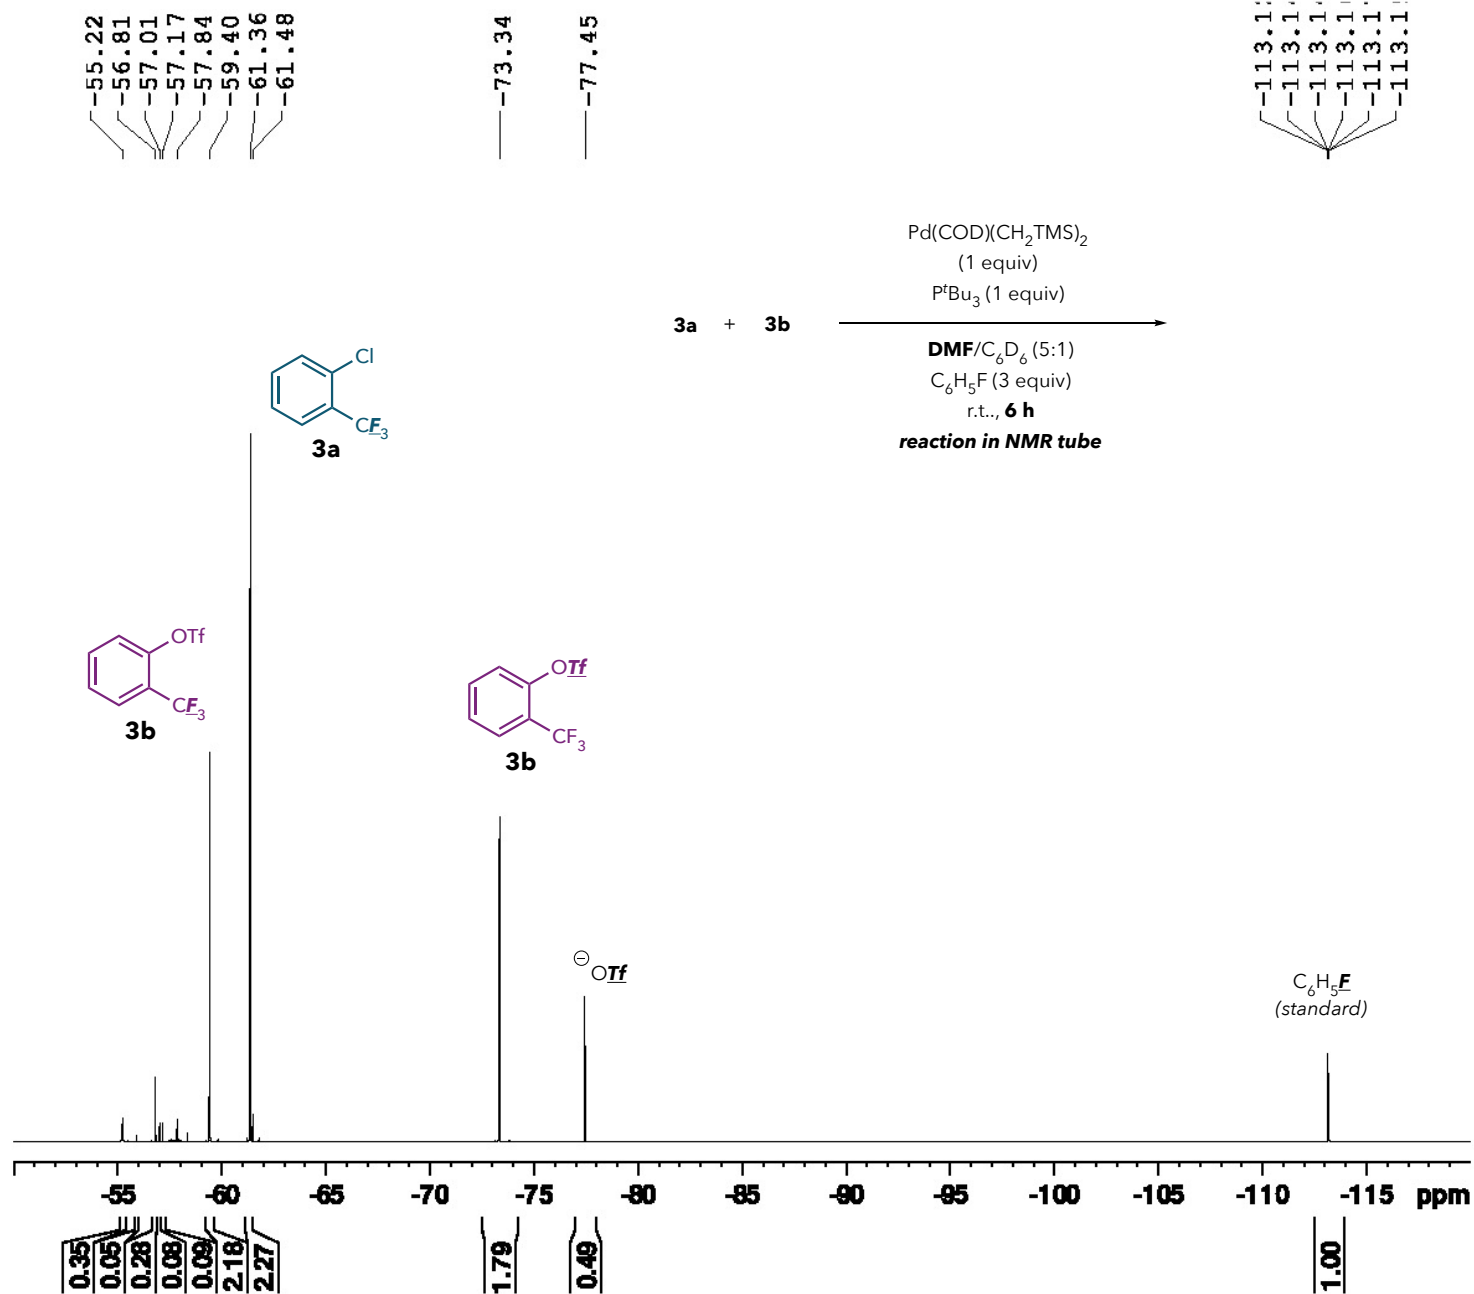

Current Data Parameters  
 NAME 6-SMR-43-65  
 EXPNO 10  
 PROCNO 2

F2 - Acquisition Parameter  
 Date\_ 20211117  
 Time 15.03 h  
 INSTRUM spect  
 PROBHD Z125869\_0055 (  
 PULPROG zgpg30  
 TD 131072  
 SOLVENT C6D6  
 NS 16  
 DS 4  
 SWH 113636.367 Hz  
 FIDRES 1.733953 Hz  
 AQ 0.5767168 sec  
 RG 15.61  
 DW 4.400 usec  
 DE 18.00 usec  
 TE 298.0 K  
 D1 1.00000000 sec  
 TD0 1  
 SFO1 470.6394024 MHz  
 NUC1 19F  
 P1 15.00 usec  
 PLW1 11.70800018 W

F2 - Processing parameters  
 SI 65536  
 SF 470.6858683 MHz  
 WDW EM  
 SSB 0  
 LB 0.30 Hz  
 GB 0  
 PC 1.00



Current Data Parameters  
 NAME 6-SMR-43-65  
 EXPNO 11  
 PROCNO 1

F2 - Acquisition Parameter  
 Date\_ 20211117  
 Time 15.06 h  
 INSTRUM spect  
 PROBHD Z125869\_0055 (  
 PULPROG zgpg30  
 TD 65536  
 SOLVENT C6D6  
 NS 16  
 DS 4  
 SWH 81521.742 Hz  
 FIDRES 2.487846 Hz  
 AQ 0.4019541 sec  
 RG 190.44  
 DW 6.133 usec  
 DE 18.00 usec  
 TE 298.0 K  
 D1 2.00000000 sec  
 D11 0.03000000 sec  
 TD0 1  
 SFO1 202.4866909 MHz  
 NUC1 31P  
 P0 4.00 usec  
 P1 12.00 usec  
 PLW1 40.26200104 W  
 SFO2 500.2320009 MHz  
 NUC2 1H  
 CPDPRG[2] waltz16  
 PCPD2 80.00 usec  
 PLW2 11.44699955 W  
 PLW12 0.25756001 W  
 PLW13 0.12955000 W

F2 - Processing parameters  
 SI 32768  
 SF 202.4968157 MHz  
 WDW EM  
 SSB 0  
 LB 1.00 Hz  
 GB 0  
 PC 1.40

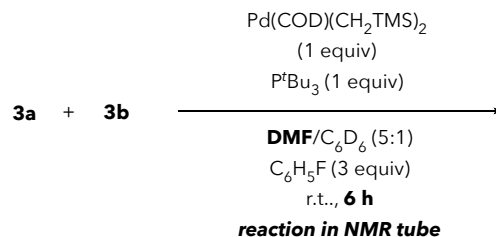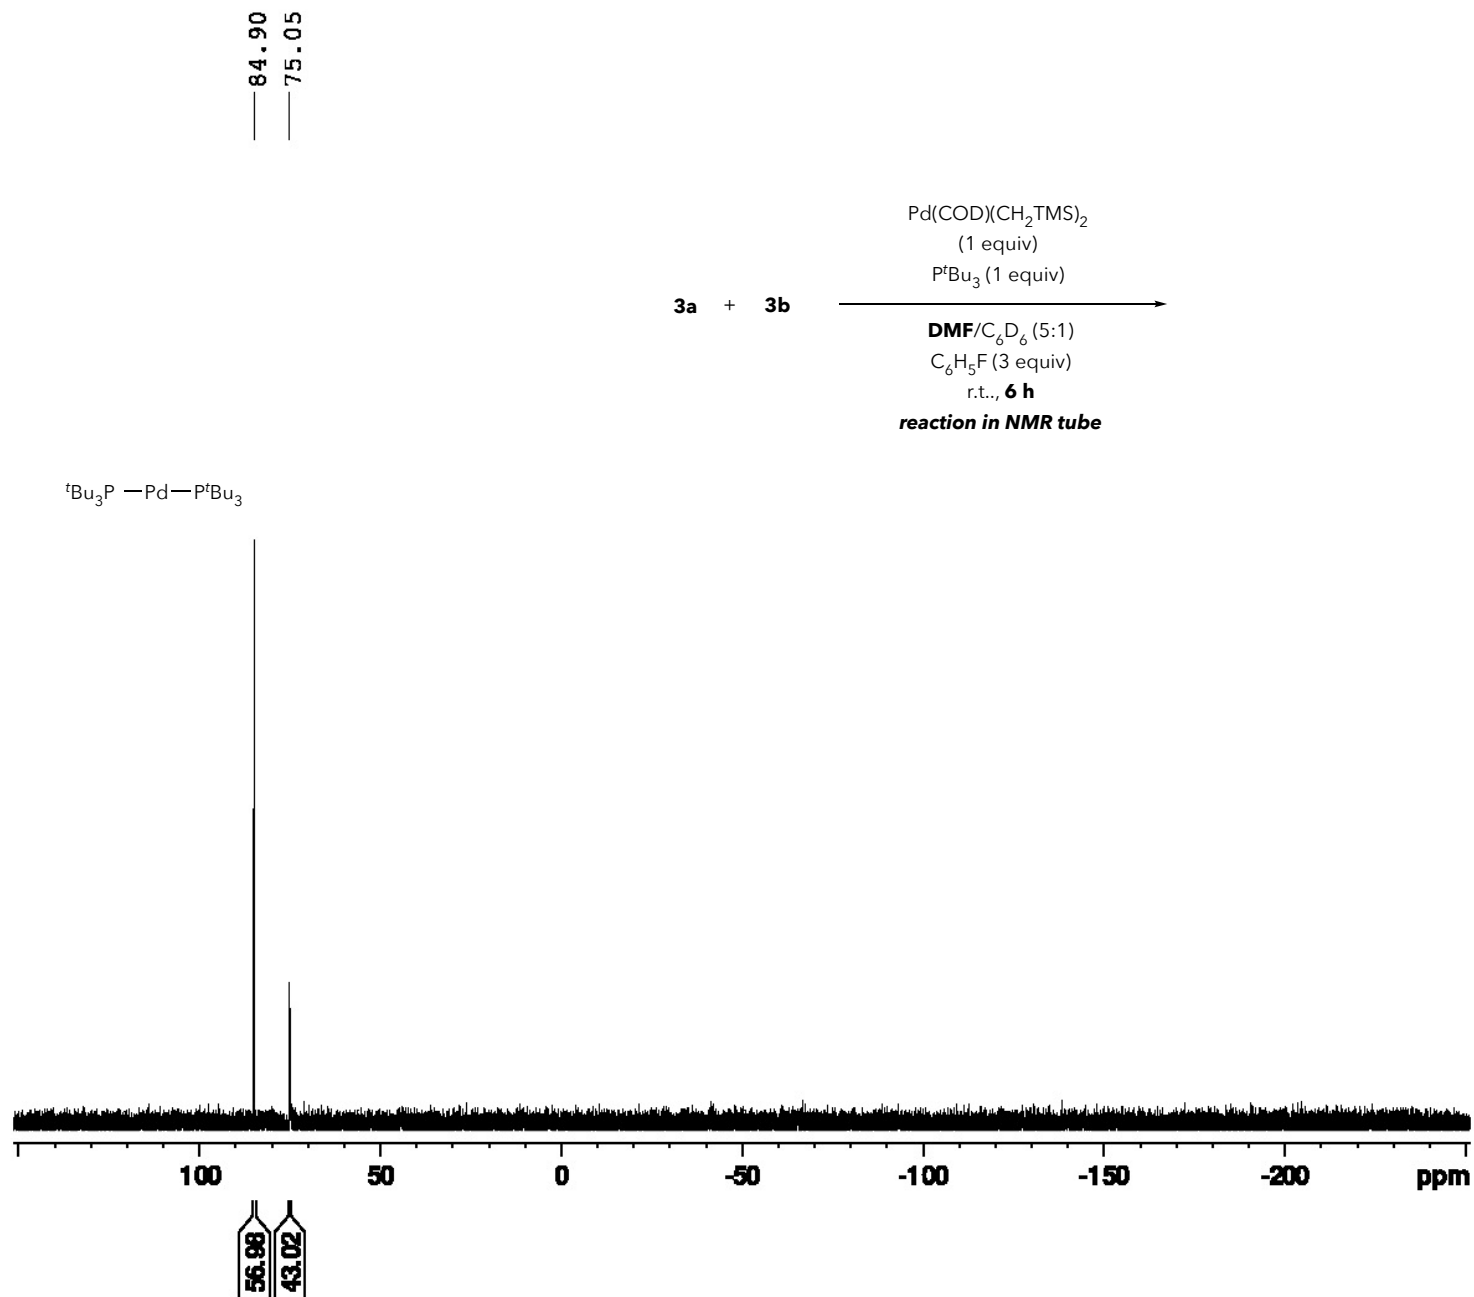

## 4. Reactions in the Presence of Additives

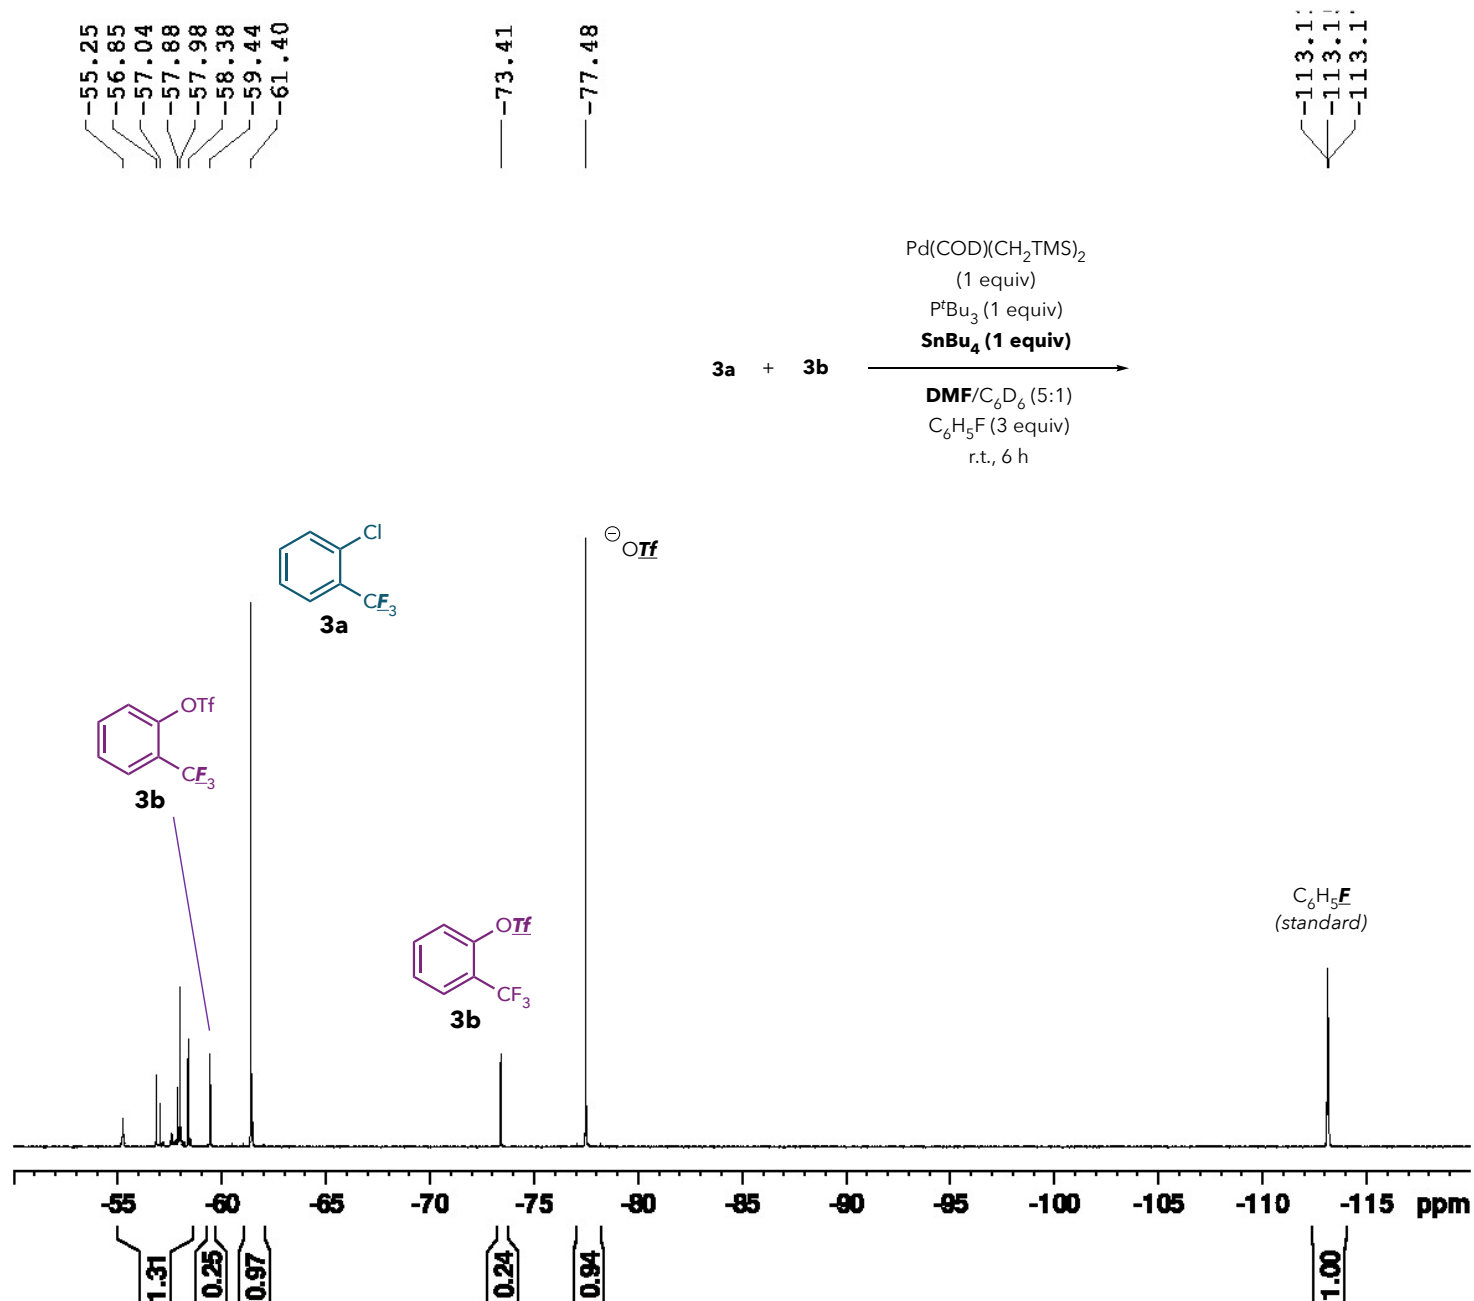

Current Data Parameters  
 NAME ER-6-70-1\_1SnBu4  
 EXPNO 1  
 PROCNO 1

F2 - Acquisition Parameter  
 Date\_ 20200831  
 Time 7.31  
 INSTRUM spect  
 PROBHD 5 mm QNP 1H/13  
 PULPROG zgpg30  
 TD 32768  
 SOLVENT C6D6  
 NS 64  
 DS 0  
 SWH 50125.312 Hz  
 FIDRES 1.529703 Hz  
 AQ 0.3268608 sec  
 RG 3649.1  
 DW 9.975 usec  
 DE 6.00 usec  
 TE 683.2 K  
 D1 1.50000000 sec  
 TD0 1

===== CHANNEL f1 =====  
 NUC1 19F  
 P1 9.00 usec  
 PL1 0 dB  
 SFO1 282.4250465 MHz

F2 - Processing parameters  
 SI 65536  
 SF 282.4416810 MHz  
 WDW EM  
 SSB 0  
 LB 0.30 Hz  
 GB 0  
 PC 1.00

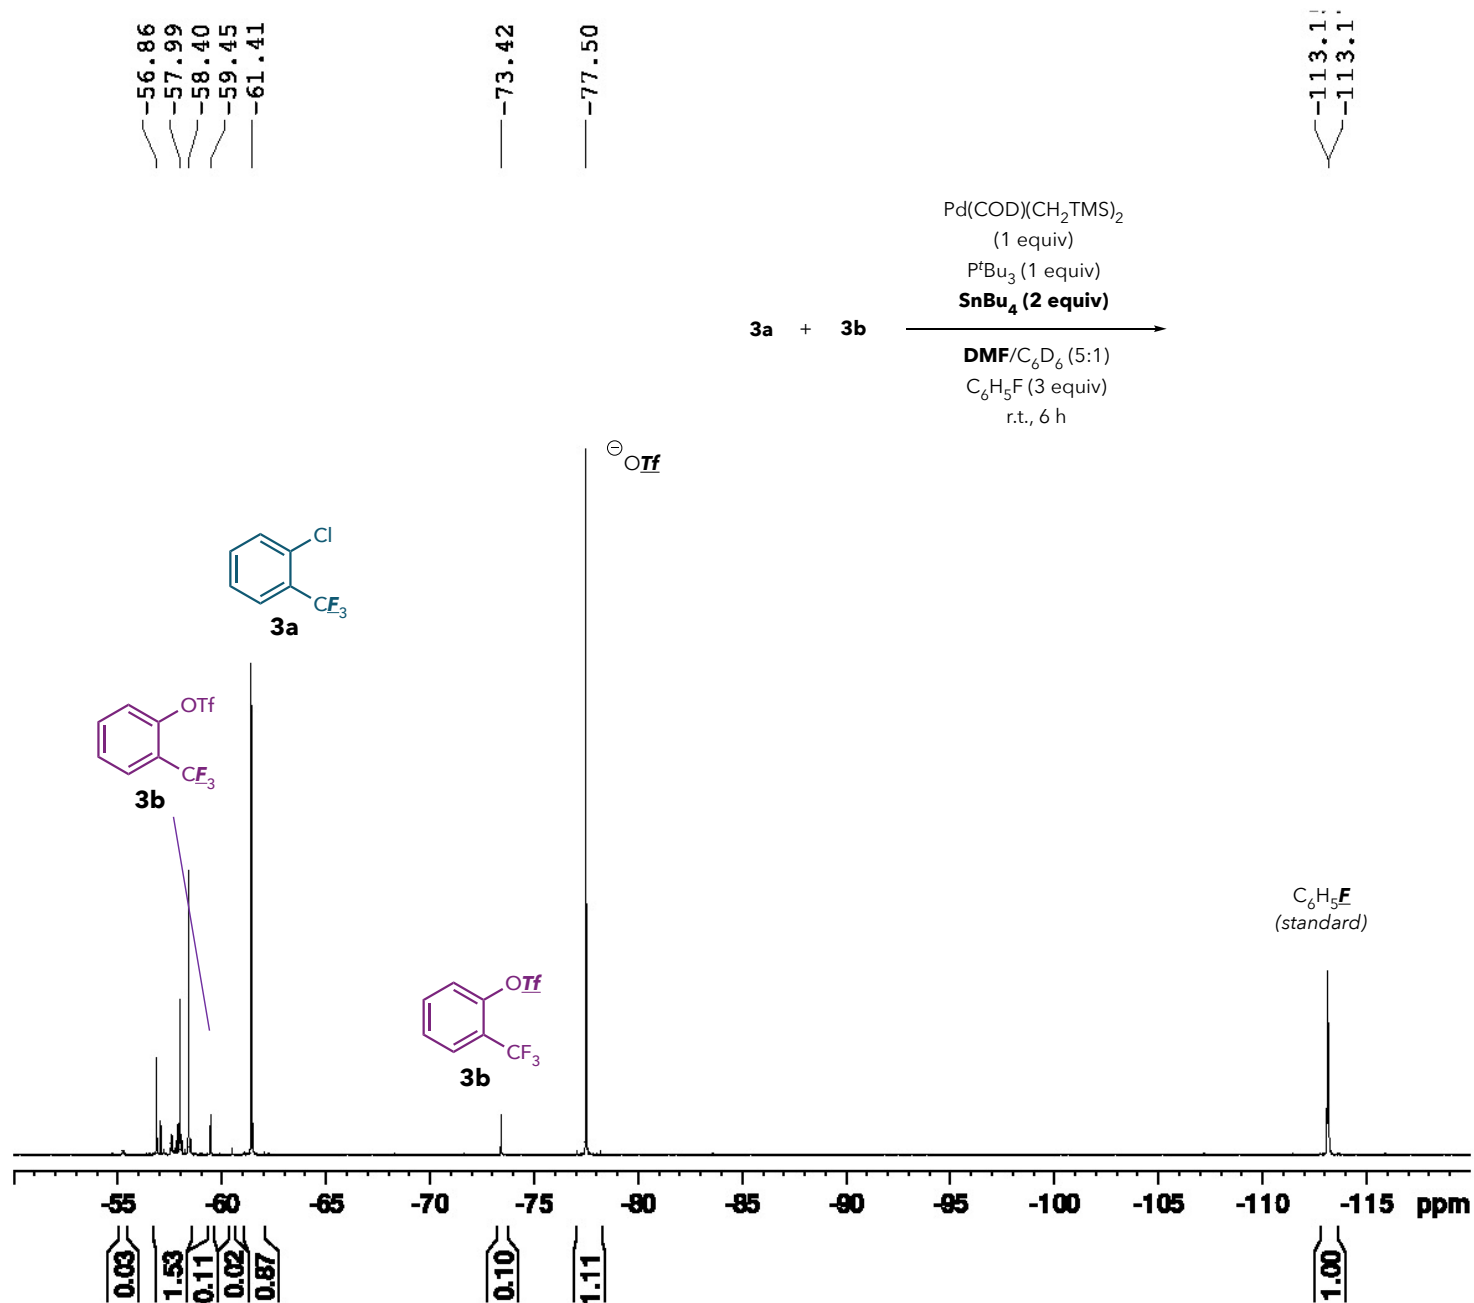

Current Data Parameters  
 NAME ER-6-70-3\_2SnBu4  
 EXPNO 1  
 PROCNO 1

F2 - Acquisition Parameter  
 Date\_ 20200831  
 Time 7.37  
 INSTRUM spect  
 PROBHD 5 mm QNP 1H/13  
 PULPROG zgfglqn  
 TD 32768  
 SOLVENT C6D6  
 NS 64  
 DS 0  
 SWH 50125.312 Hz  
 FIDRES 1.529703 Hz  
 AQ 0.3268608 sec  
 RG 3649.1  
 DW 9.975 usec  
 DE 6.00 usec  
 TE 683.2 K  
 D1 1.50000000 sec  
 TD0 1

===== CHANNEL f1 =====  
 NUC1 19F  
 P1 9.00 usec  
 PL1 0 dB  
 SFO1 282.4250465 MHz

F2 - Processing parameters  
 SI 65536  
 SF 282.4416834 MHz  
 WDW EM  
 SSB 0  
 LB 0.30 Hz  
 GB 0  
 PC 1.00

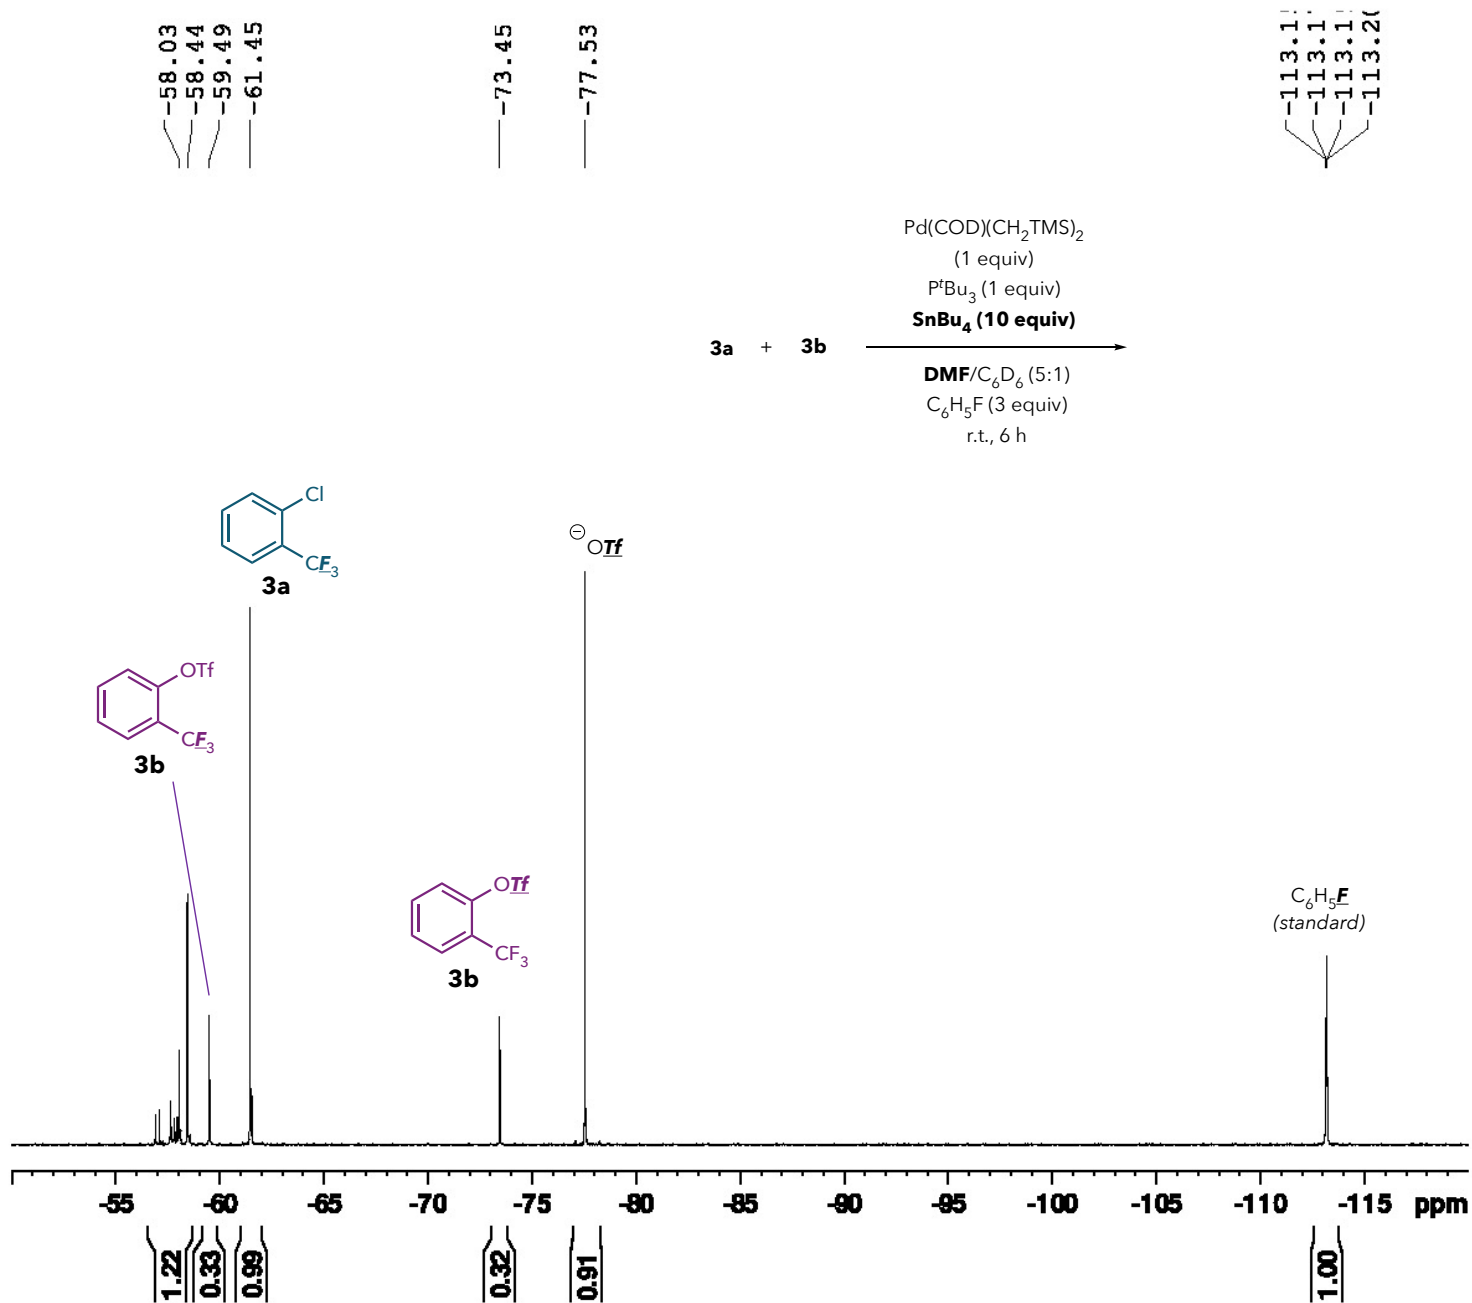

Current Data Parameters  
 NAME ER-6-70-5\_10SnBu4  
 EXPNO 1  
 PROCNO 1

F2 - Acquisition Parameter  
 Date\_ 20200831  
 Time 7.43  
 INSTRUM spect  
 PROBHD 5 mm QNP 1H/13  
 PULPROG zgpg30  
 TD 32768  
 SOLVENT C6D6  
 NS 64  
 DS 0  
 SWH 50125.312 Hz  
 FIDRES 1.529703 Hz  
 AQ 0.3268608 sec  
 RG 2580.3  
 DW 9.975 usec  
 DE 6.00 usec  
 TE 683.2 K  
 D1 1.50000000 sec  
 TD0 1

===== CHANNEL f1 =====  
 NUC1 19F  
 P1 9.00 usec  
 PL1 0 dB  
 SFO1 282.4250465 MHz

F2 - Processing parameters  
 SI 65536  
 SF 282.4416899 MHz  
 WDW EM  
 SSB 0  
 LB 0.30 Hz  
 GB 0  
 PC 1.00

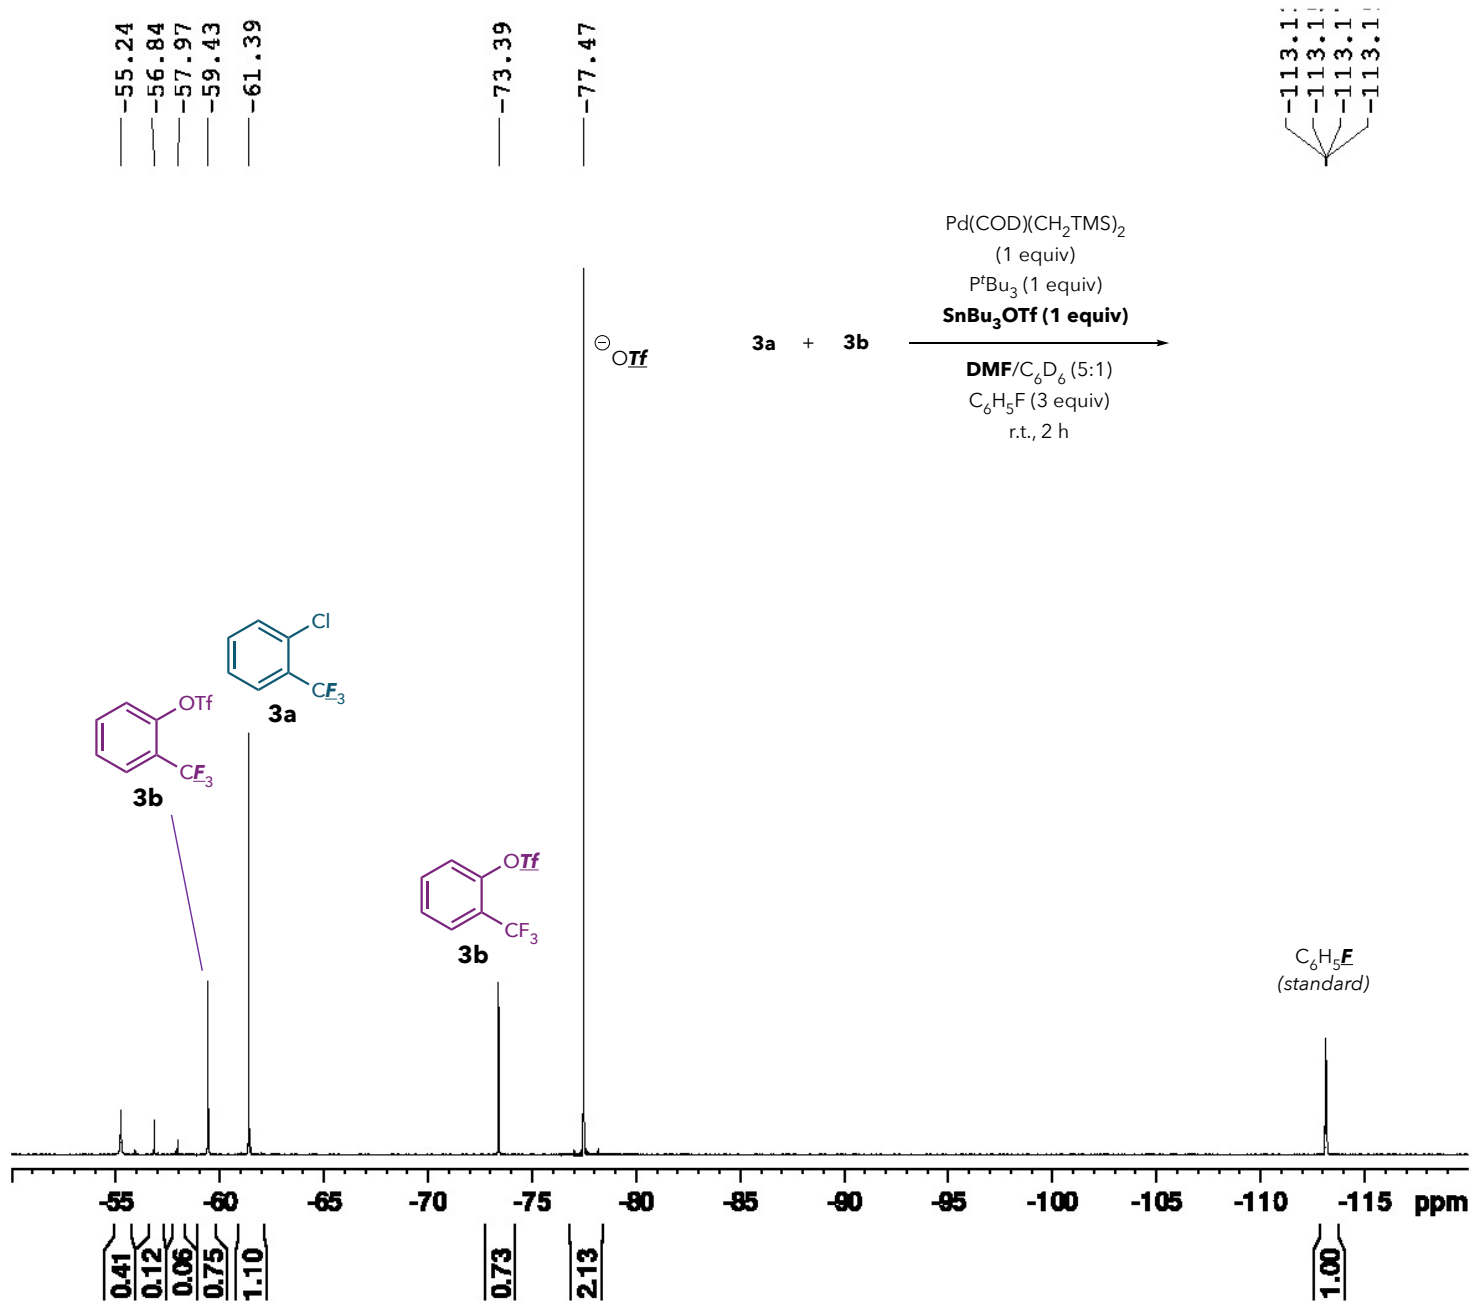

113.1  
113.1  
113.1  
113.1



Current Data Parameters  
 NAME ER-6-81\_CA\_1SnBu3OTf  
 EXPNO 1  
 PROCNO 1

F2 - Acquisition Parameters  
 Date\_ 20201026  
 Time 7.51  
 INSTRUM spect  
 PROBHD 5 mm QNP 1H/13  
 PULPROG zgpg30  
 TD 32768  
 SOLVENT C6D6  
 NS 64  
 DS 0  
 SWH 50125.312 Hz  
 FIDRES 1.529703 Hz  
 AQ 0.3268608 sec  
 RG 2580.3  
 DW 9.975 usec  
 DE 6.00 usec  
 TE 683.2 K  
 D1 1.50000000 sec  
 TDO 1

===== CHANNEL f1 =====  
 NUC1 19F  
 P1 9.00 usec  
 PL1 0 dB  
 SFO1 282.4250465 MHz

F2 - Processing parameters  
 SI 65536  
 SF 282.4416787 MHz  
 WDW EM  
 SSB 0  
 LB 0.30 Hz  
 GB 0  
 PC 1.00

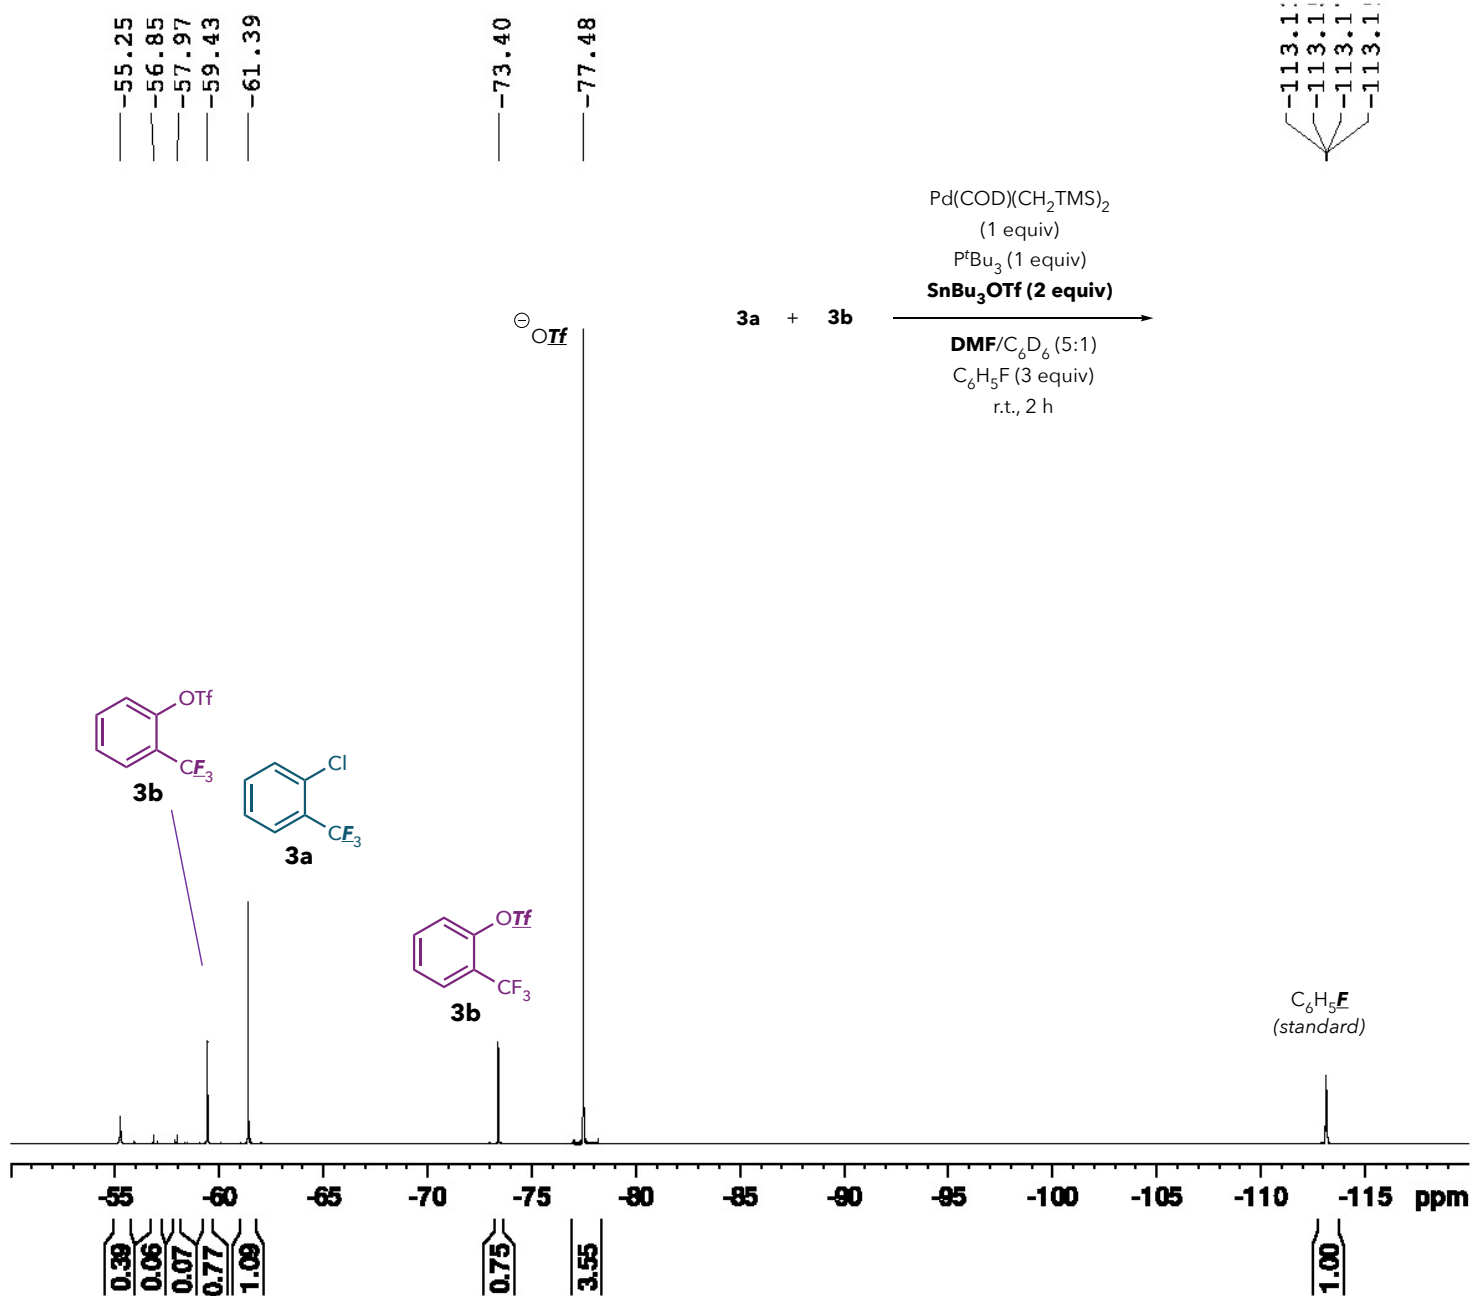

113.1  
113.1  
113.1  
113.1

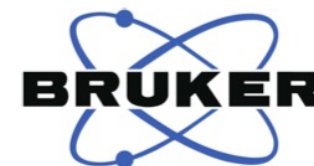

Current Data Parameters  
 NAME ER-6-81\_CA\_2SnBu3OTf  
 EXPNO 3  
 PROCNO 1

F2 - Acquisition Parameters  
 Date\_ 20201026  
 Time 7.55  
 INSTRUM spect  
 PROBHD 5 mm QNP 1H/13  
 PULPROG zgpg30  
 TD 32768  
 SOLVENT C6D6  
 NS 64  
 DS 0  
 SWH 50125.312 Hz  
 FIDRES 1.529703 Hz  
 AQ 0.3268608 sec  
 RG 2580.3  
 DW 9.975 usec  
 DE 6.00 usec  
 TE 683.2 K  
 D1 1.50000000 sec  
 TDO 1

===== CHANNEL f1 =====  
 NUC1 19F  
 P1 9.00 usec  
 PL1 0 dB  
 SFO1 282.4250465 MHz

F2 - Processing parameters  
 SI 65536  
 SF 282.4416809 MHz  
 WDW EM  
 SSB 0  
 LB 0.30 Hz  
 GB 0  
 PC 1.00

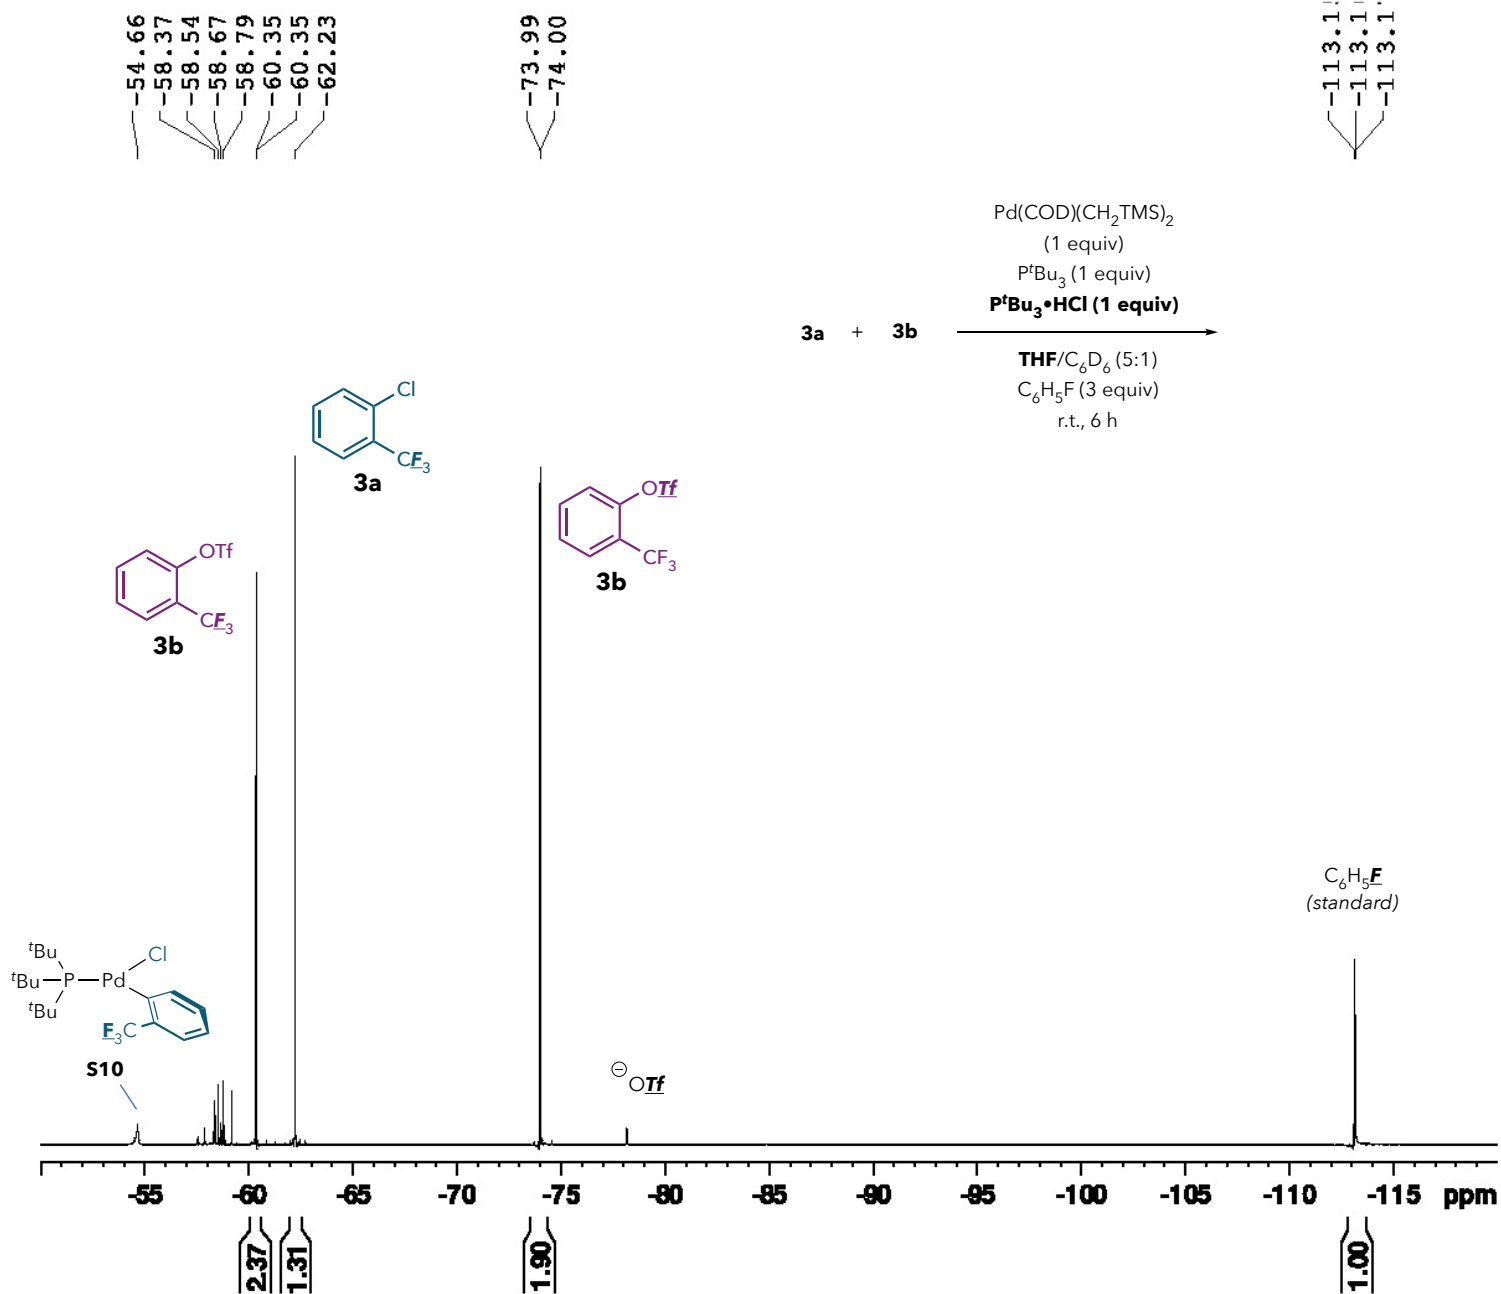

Current Data Parameters  
NAME 6-SMR-6-3  
EXPNO 10  
PROCNO 2

F2 - Acquisition Parameter  
Date\_ 20210912  
Time 17.49 h  
INSTRUM Avance Neo  
PROBHD Z152088\_0031 (  
PULPROG zg  
TD 130892  
SOLVENT C6D6  
NS 16  
DS 4  
SWH 90909.094 Hz  
FIDRES 1.389070 Hz  
AQ 0.7199060 sec  
RG 101  
DW 5.500 usec  
DE 6.50 usec  
TE 298.0 K  
D1 1.00000000 sec  
TD0 1  
SFO1 376.4607164 MHz  
NUC1 19F  
P1 12.00 usec  
PLW1 31.08900070 W

F2 - Processing parameters  
SI 65536  
SF 376.4979689 MHz  
WDW EM  
SSB 0  
LB 0.30 Hz  
GB 0  
PC 1.00

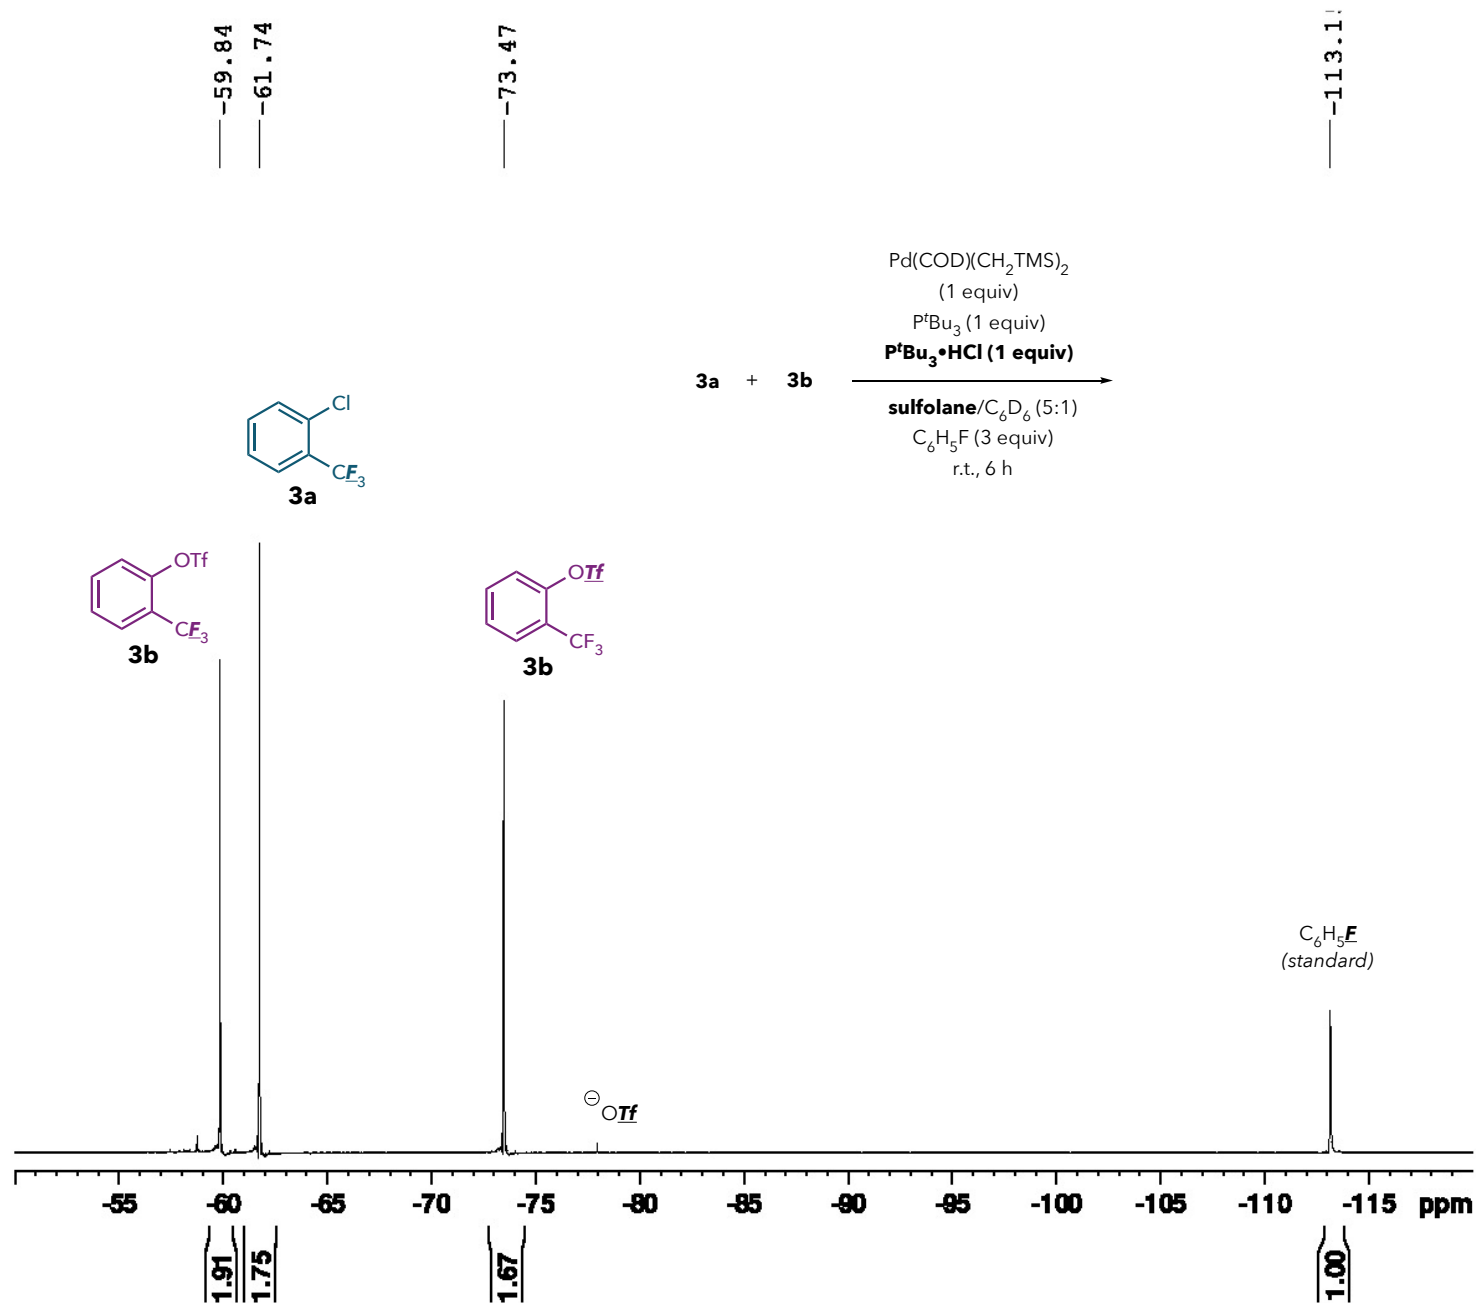

Current Data Parameters  
NAME 6-SMR-6-7  
EXPNO 10  
PROCNO 2

F2 - Acquisition Parameter  
Date\_ 20210912  
Time 18.08 h  
INSTRUM Avance Neo  
PROBHD Z152088\_0031 (  
PULPROG zg  
TD 130892  
SOLVENT C6D6  
NS 16  
DS 4  
SWH 90909.094 Hz  
FIDRES 1.389070 Hz  
AQ 0.7199060 sec  
RG 101  
DW 5.500 usec  
DE 6.50 usec  
TE 298.0 K  
D1 1.00000000 sec  
TD0 1  
SFO1 376.4607164 MHz  
NUC1 19F  
P1 12.00 usec  
PLW1 31.08900070 W

F2 - Processing parameters  
SI 65536  
SF 376.4982233 MHz  
WDW EM  
SSB 0  
LB 0.30 Hz  
GB 0  
PC 1.00

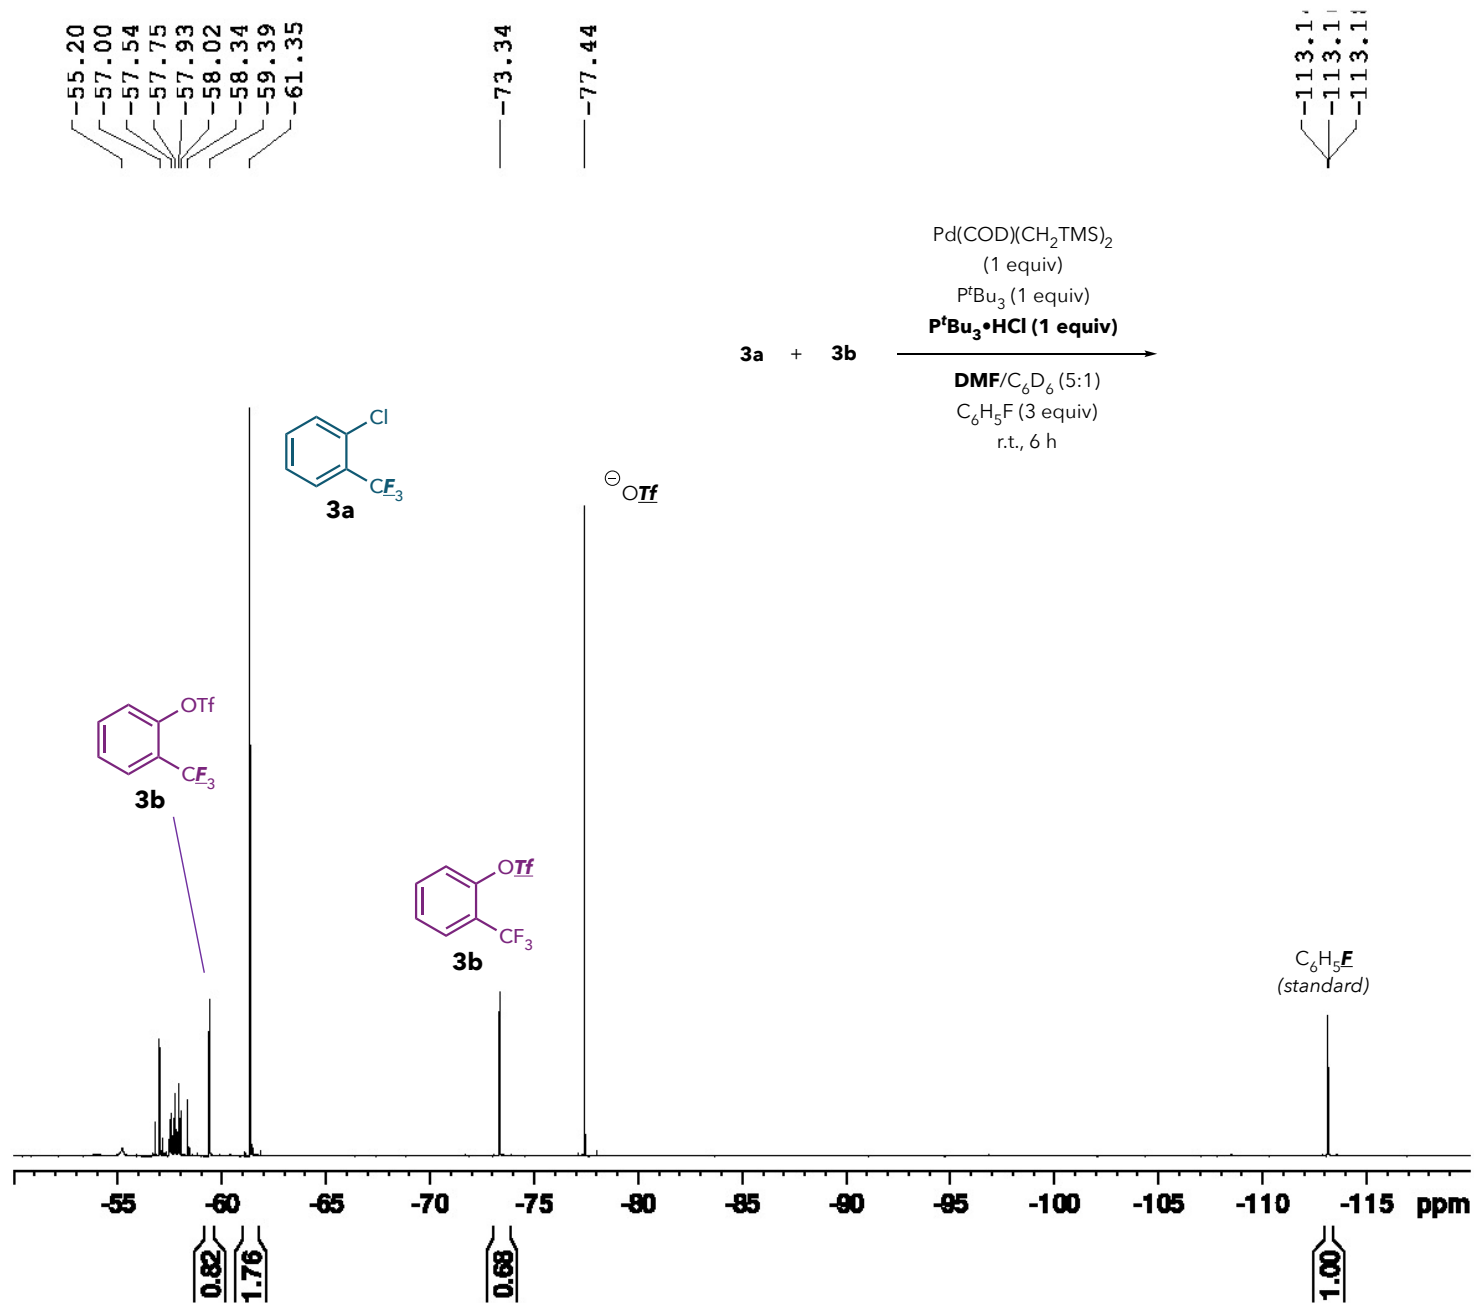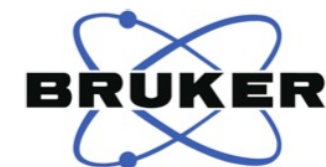

Current Data Parameters  
 NAME 6-SMR-6-11  
 EXPNO 10  
 PROCNO 2

F2 - Acquisition Parameter  
 Date\_ 20210912  
 Time 18.27 h  
 INSTRUM Avance Neo  
 PROBHD Z152088\_0031 (   
 PULPROG zg  
 TD 130892  
 SOLVENT C6D6  
 NS 16  
 DS 4  
 SWH 90909.094 Hz  
 FIDRES 1.389070 Hz  
 AQ 0.7199060 sec  
 RG 101  
 DW 5.500 usec  
 DE 6.50 usec  
 TE 298.0 K  
 D1 1.00000000 sec  
 TD0 1  
 SFO1 376.4607164 MHz  
 NUC1 19F  
 P1 12.00 usec  
 PLW1 31.08900070 W

F2 - Processing parameters  
 SI 65536  
 SF 376.4978866 MHz  
 WDW EM  
 SSB 0  
 LB 0.30 Hz  
 GB 0  
 PC 1.00

## C. Stoichiometric Oxidative Addition Studies with S15a and S15b

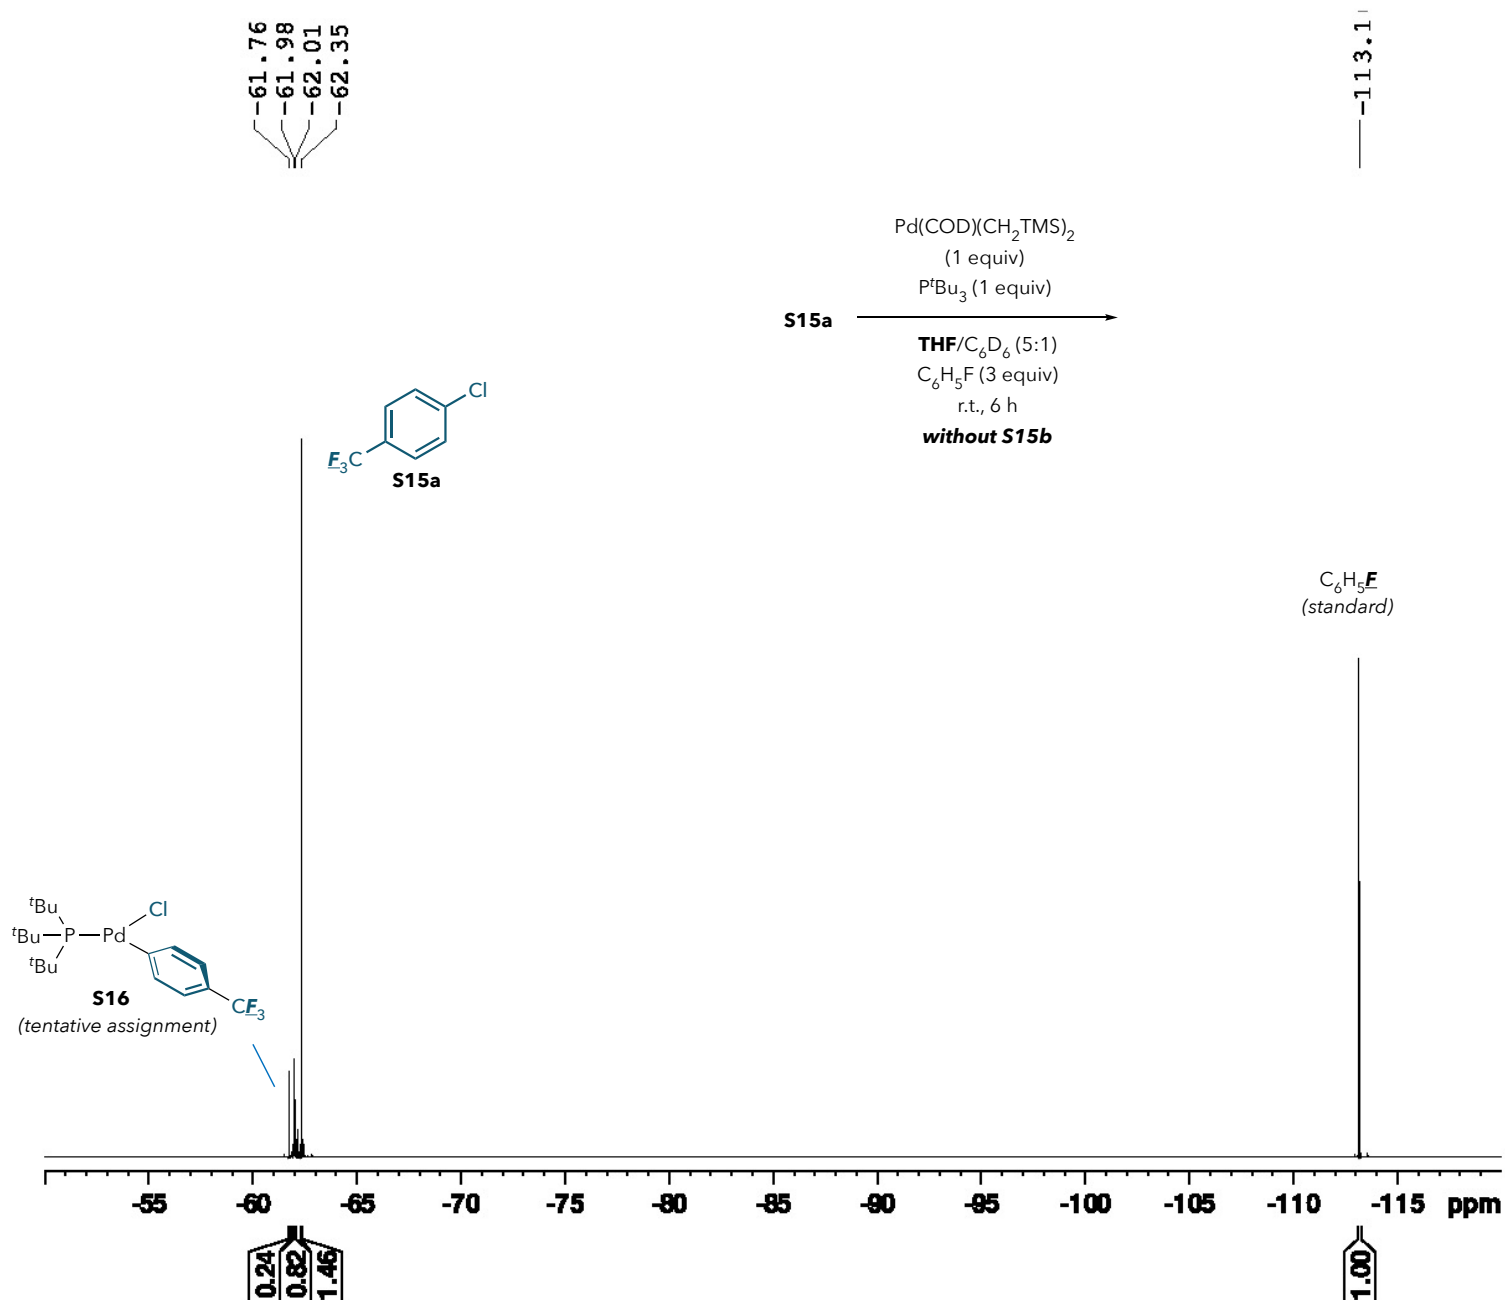

Current Data Parameters  
 NAME 6-SMR-37-3  
 EXPNO 10  
 PROCNO 2

F2 - Acquisition Parameter  
 Date\_ 20211112  
 Time 15.41 h  
 INSTRUM Avance Neo  
 PROBHD Z152088\_0031 (  
 PULPROG zgig  
 TD 130892  
 SOLVENT C6D6  
 NS 16  
 DS 4  
 SWH 90909.094 Hz  
 FIDRES 1.389070 Hz  
 AQ 0.7199060 sec  
 RG 101  
 DW 5.500 usec  
 DE 6.50 usec  
 TE 298.1 K  
 D1 1.00000000 sec  
 D11 0.03000000 sec  
 TD0 1  
 SFO1 376.4607164 MHz  
 NUC1 19F  
 P1 12.00 usec  
 PLW1 31.08900070 W  
 SFO2 400.1316005 MHz  
 NUC2 1H  
 CPDPRG[2] waltz16  
 PCPD2 90.00 usec  
 PLW2 24.03499985 W  
 PLW12 0.18990999 W

F2 - Processing parameters  
 SI 65536  
 SF 376.4979782 MHz  
 WDW EM  
 SSB 0  
 LB 0.30 Hz  
 GB 0  
 PC 1.00

84.83  
82.14  
81.35  
81.20  
81.15  
69.49

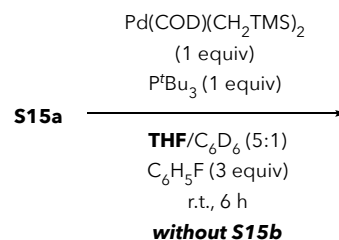

Current Data Parameters  
 NAME 6-SMR-37-4  
 EXPNO 11  
 PROCNO 1

F2 - Acquisition Parameter  
 Date\_ 20211112  
 Time 15.56 h  
 INSTRUM Avance Neo  
 PROBHD Z152088\_0031 (  
 PULPROG zgpg30  
 TD 65536  
 SOLVENT C6D6  
 NS 32  
 DS 4  
 SWH 65789.477 Hz  
 FIDRES 2.007735 Hz  
 AQ 0.4980736 sec  
 RG 101  
 DW 7.600 usec  
 DE 6.50 usec  
 TE 298.0 K  
 D1 2.00000000 sec  
 D11 0.03000000 sec  
 TD0 1  
 SFO1 161.9674942 MHz  
 NUC1 31P  
 P0 2.67 usec  
 P1 8.00 usec  
 PLW1 45.86100006 W  
 SFO2 400.1316005 MHz  
 NUC2 1H  
 CPDPRG[2] waltz16  
 PCPD2 90.00 usec  
 PLW2 24.03499985 W  
 PLW12 0.18990999 W  
 PLW13 0.09552100 W

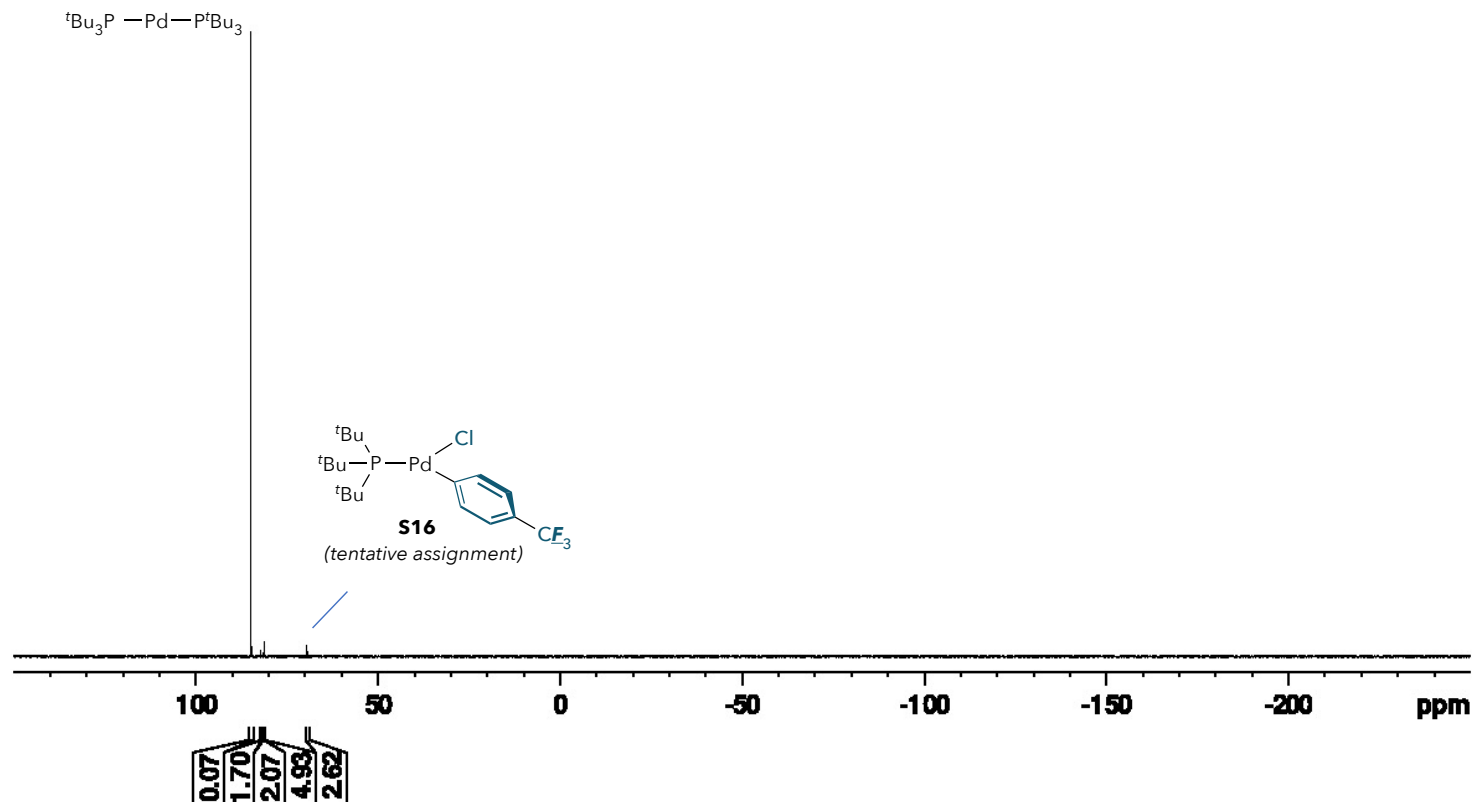

F2 - Processing parameters  
 SI 32768  
 SF 161.9755930 MHz  
 WDW EM  
 SSB 0  
 LB 1.00 Hz  
 GB 0  
 PC 1.40

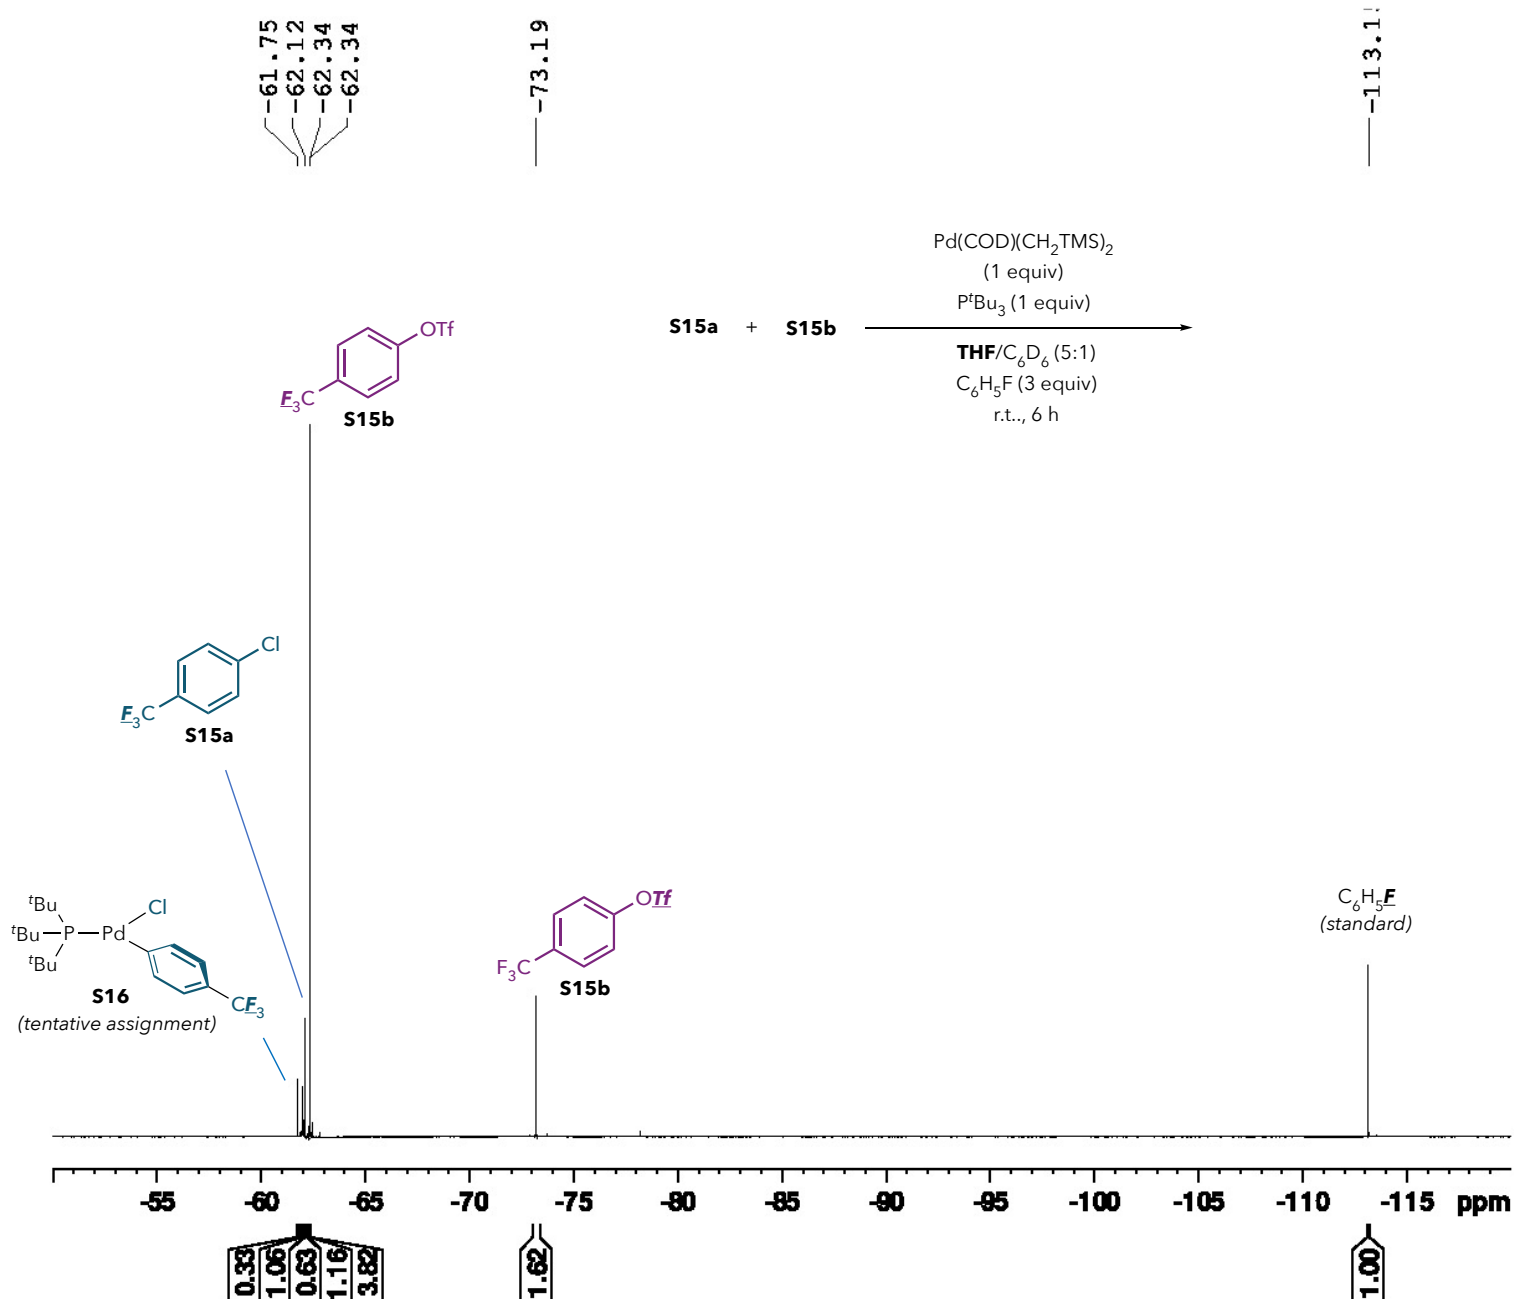

Current Data Parameters  
 NAME 6-SMR-38-4  
 EXPNO 10  
 PROCNO 2

F2 - Acquisition Parameter  
 Date\_ 20211113  
 Time 16.28 h  
 INSTRUM Avance Neo  
 PROBHD Z152088\_0031 (  
 PULPROG zgig  
 TD 131072  
 SOLVENT C6D6  
 NS 16  
 DS 4  
 SWH 90909.094 Hz  
 FIDRES 1.387163 Hz  
 AQ 0.7208960 sec  
 RG 101  
 DW 5.500 usec  
 DE 6.50 usec  
 TE 298.1 K  
 D1 1.00000000 sec  
 D11 0.03000000 sec  
 TD0 1  
 SFO1 376.4607164 MHz  
 NUC1 19F  
 P1 12.00 usec  
 PLW1 31.08900070 W  
 SFO2 400.1316005 MHz  
 NUC2 1H  
 CPDPRG[2] waltz16  
 PCPD2 90.00 usec  
 PLW2 24.03499985 W  
 PLW12 0.18990999 W

F2 - Processing parameters  
 SI 65536  
 SF 376.4979697 MHz  
 WDW EM  
 SSB 0  
 LB 0.30 Hz  
 GB 0  
 PC 1.00



Current Data Parameters  
 NAME 6-SMR-38-4  
 EXPNO 11  
 PROCNO 1

F2 - Acquisition Parameter  
 Date\_ 20211113  
 Time 16.32 h  
 INSTRUM Avance Neo  
 PROBHD Z152088\_0031 (  
 PULPROG zgpg30  
 TD 65536  
 SOLVENT C6D6  
 NS 32  
 DS 4  
 SWH 65789.477 Hz  
 FIDRES 2.007735 Hz  
 AQ 0.4980736 sec  
 RG 101  
 DW 7.600 usec  
 DE 6.50 usec  
 TE 298.0 K  
 D1 2.00000000 sec  
 D11 0.03000000 sec  
 TD0 1  
 SFO1 161.9674942 MHz  
 NUC1 31P  
 P0 2.67 usec  
 P1 8.00 usec  
 PLW1 45.86100006 W  
 SFO2 400.1316005 MHz  
 NUC2 1H  
 CPDPRG[2] waltz16  
 PCPD2 90.00 usec  
 PLW2 24.03499985 W  
 PLW12 0.18990999 W  
 PLW13 0.09552100 W

F2 - Processing parameters  
 SI 32768  
 SF 161.9755930 MHz  
 WDW EM  
 SSB 0  
 LB 1.00 Hz  
 GB 0  
 PC 1.40

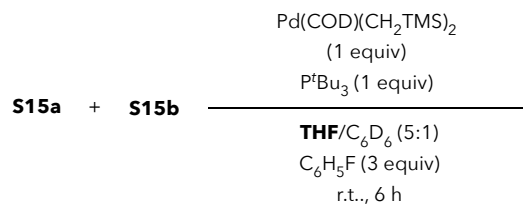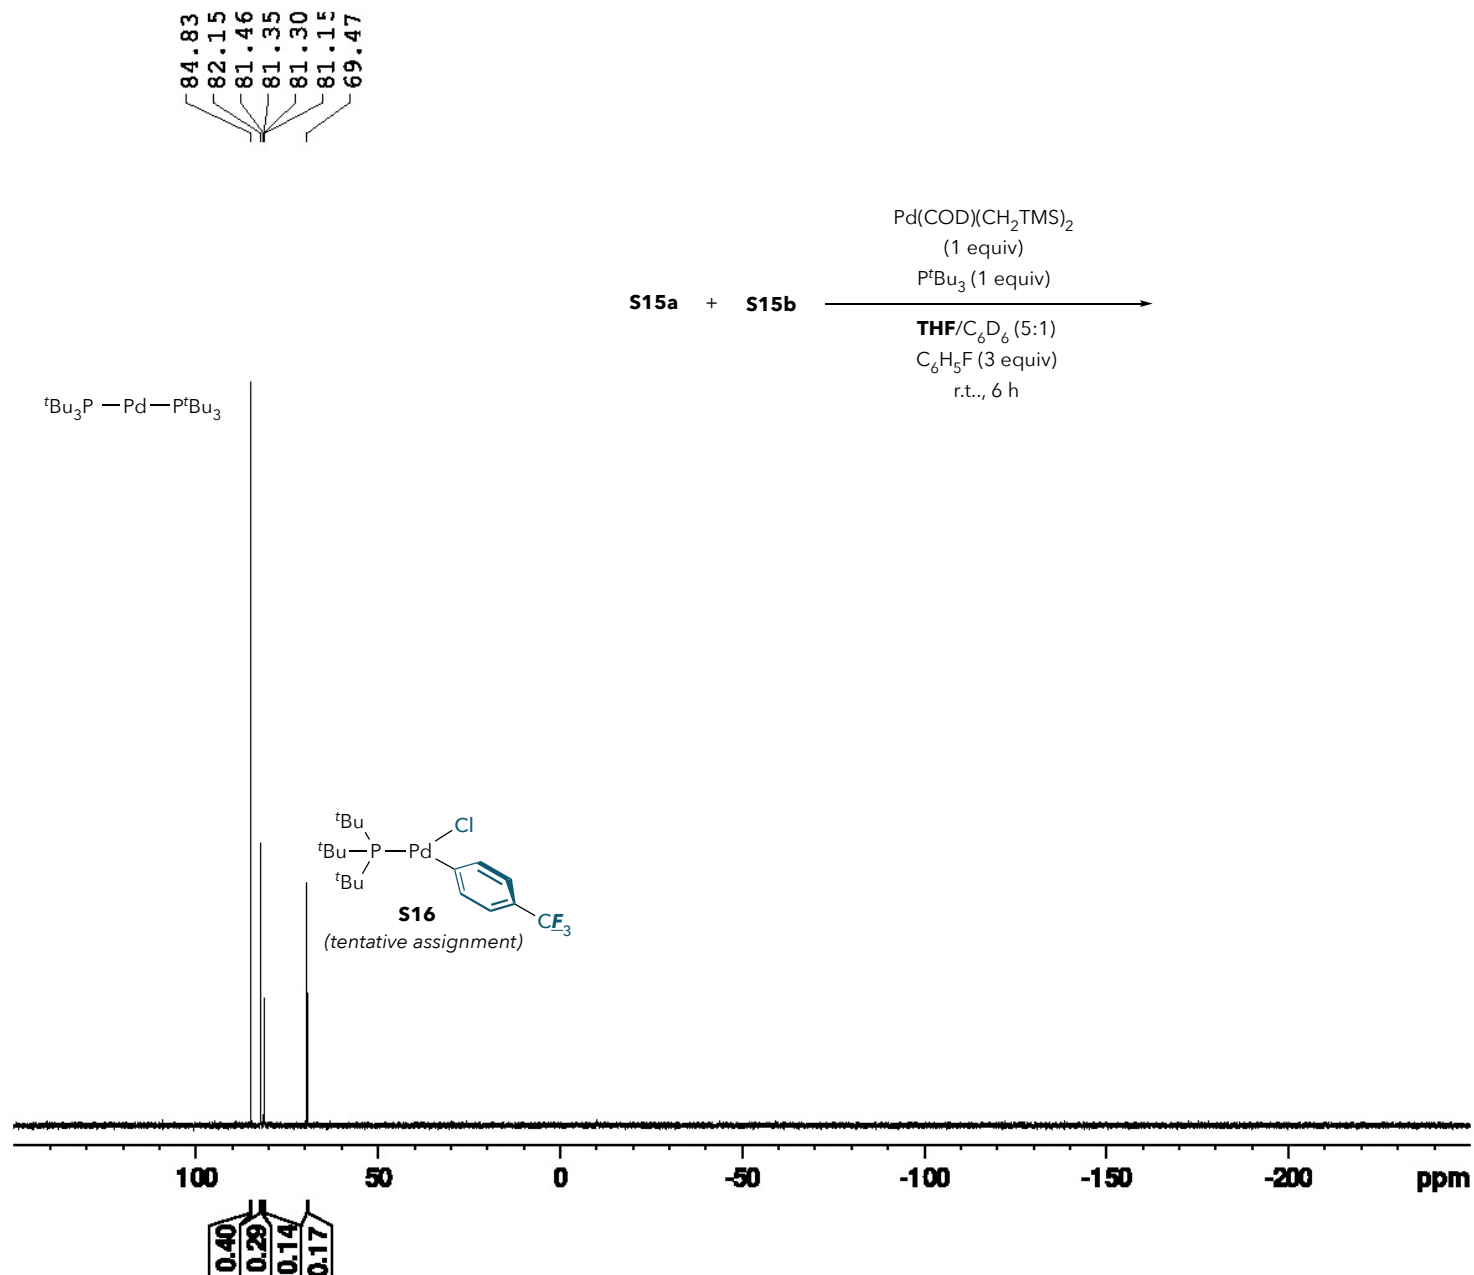

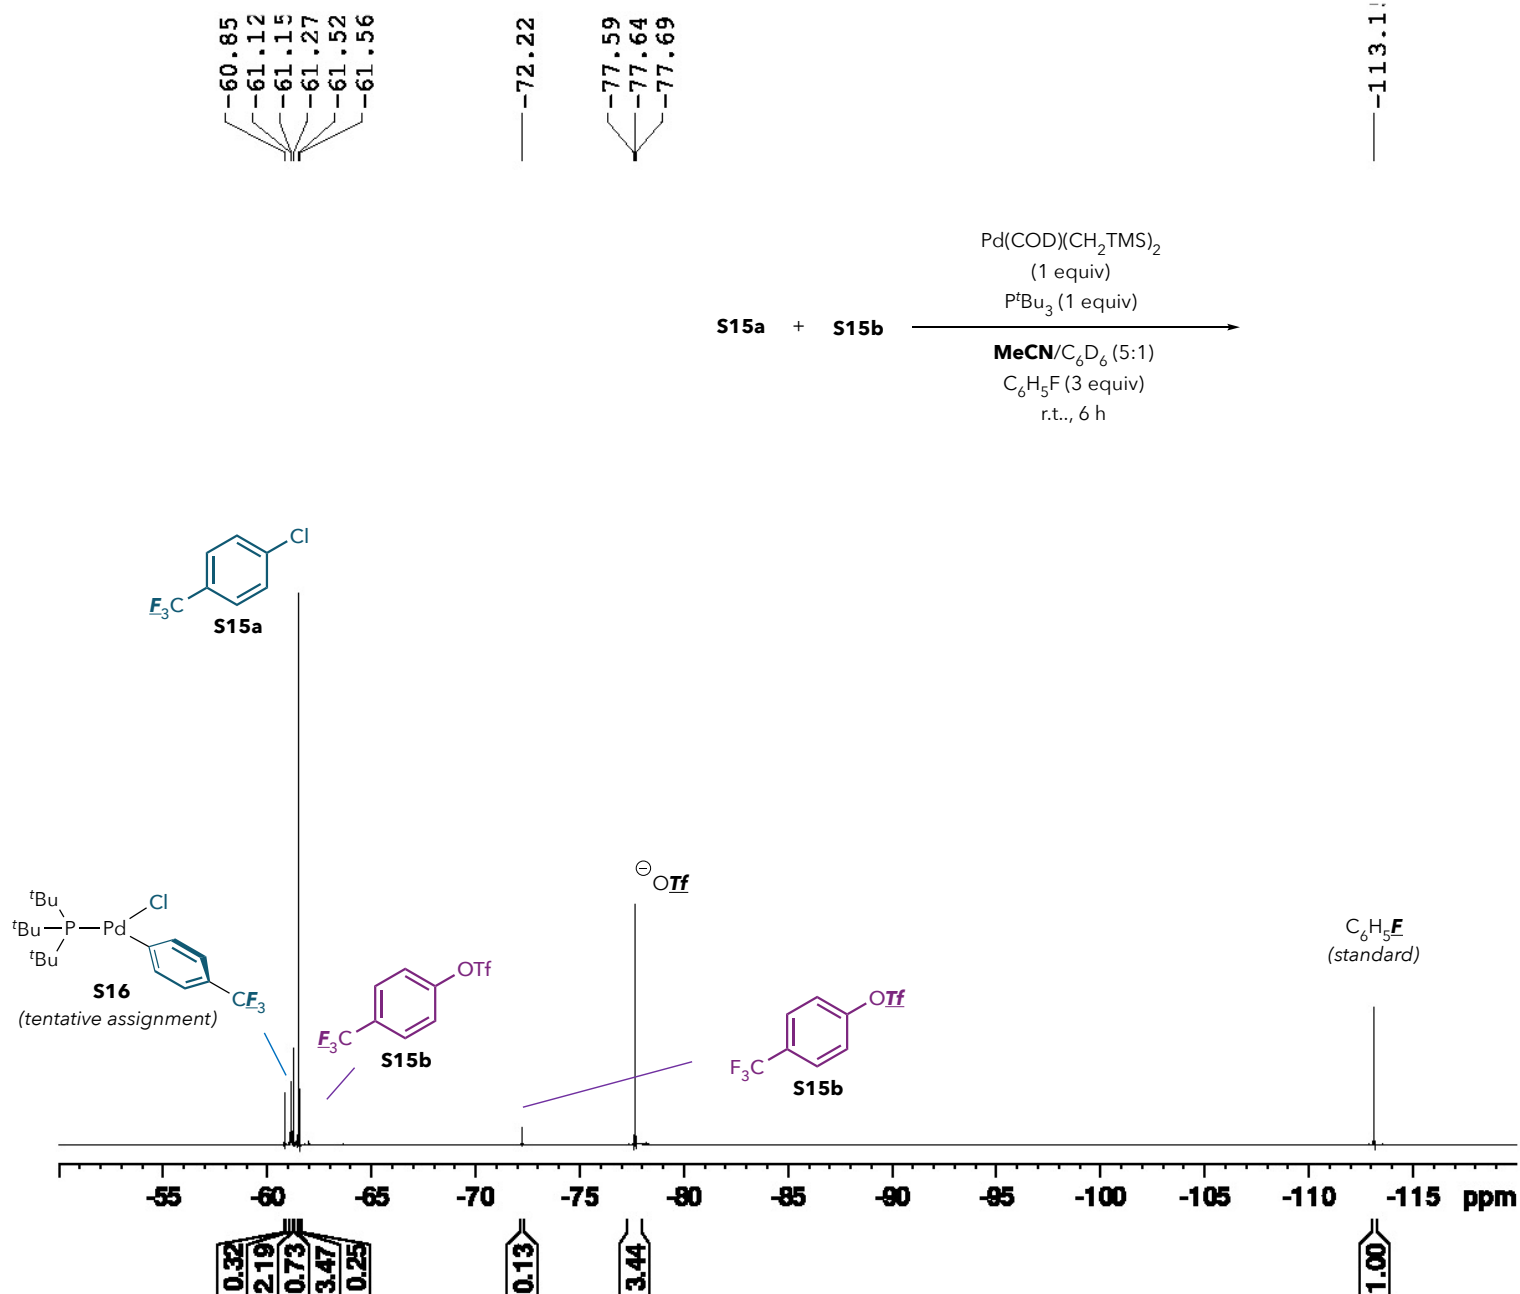

Current Data Parameters  
NAME 6-SMR-38-7  
EXPNO 10  
PROCNO 2

F2 - Acquisition Parameter  
Date\_ 20211113  
Time 16.49 h  
INSTRUM Avance Neo  
PROBHD Z152088\_0031 (  
PULPROG zgig  
TD 131072  
SOLVENT C6D6  
NS 16  
DS 4  
SWH 90909.094 Hz  
FIDRES 1.387163 Hz  
AQ 0.7208960 sec  
RG 101  
DW 5.500 usec  
DE 6.50 usec  
TE 298.1 K  
D1 1.00000000 sec  
D11 0.03000000 sec  
TD0 1  
SFO1 376.4607164 MHz  
NUC1 19F  
P1 12.00 usec  
PLW1 31.08900070 W  
SFO2 400.1316005 MHz  
NUC2 1H  
CPDPRG[2] waltz16  
PCPD2 90.00 usec  
PLW2 24.03499985 W  
PLW12 0.18990999 W

F2 - Processing parameters  
SI 65536  
SF 376.4977288 MHz  
WDW EM  
SSB 0  
LB 0.30 Hz  
GB 0  
PC 1.00

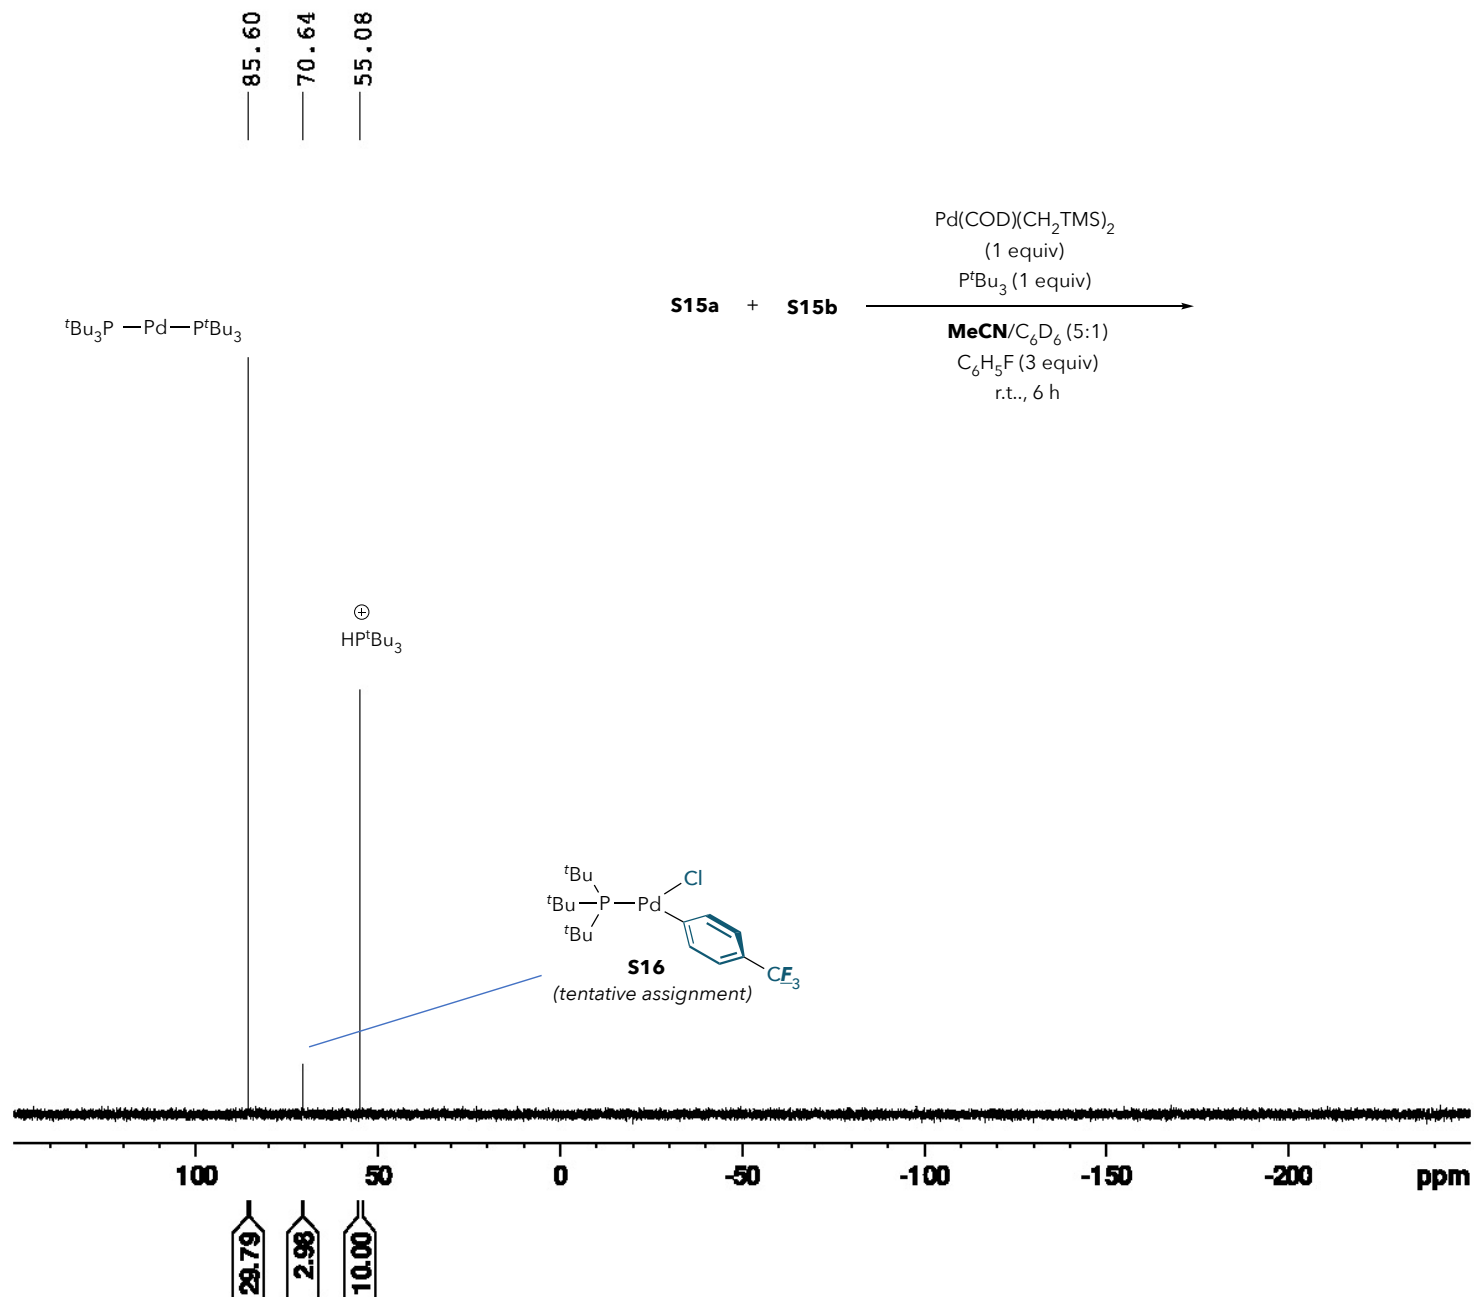

Current Data Parameters  
NAME 6-SMR-38-7  
EXPNO 11  
PROCNO 1

F2 - Acquisition Parameter  
Date\_ 20211113  
Time 16.52 h  
INSTRUM Avance Neo  
PROBHD Z152088\_0031 (  
PULPROG zgpg30  
TD 65536  
SOLVENT C6D6  
NS 32  
DS 4  
SWH 65789.477 Hz  
FIDRES 2.007735 Hz  
AQ 0.4980736 sec  
RG 101  
DW 7.600 usec  
DE 6.50 usec  
TE 298.0 K  
D1 2.00000000 sec  
D11 0.03000000 sec  
TD0 1  
SFO1 161.9674942 MHz  
NUC1 31P  
P0 2.67 usec  
P1 8.00 usec  
PLW1 45.86100006 W  
SFO2 400.1316005 MHz  
NUC2 1H  
CPDPRG[2] waltz16  
PCPD2 90.00 usec  
PLW2 24.03499985 W  
PLW12 0.18990999 W  
PLW13 0.09552100 W

F2 - Processing parameters  
SI 32768  
SF 161.9755930 MHz  
WDW EM  
SSB 0  
LB 1.00 Hz  
GB 0  
PC 1.40

-60.74  
-60.77  
-61.03  
-61.03  
-61.04  
-61.40  
-61.42

-72.58

-77.44

-113.11

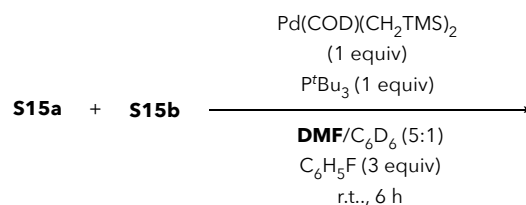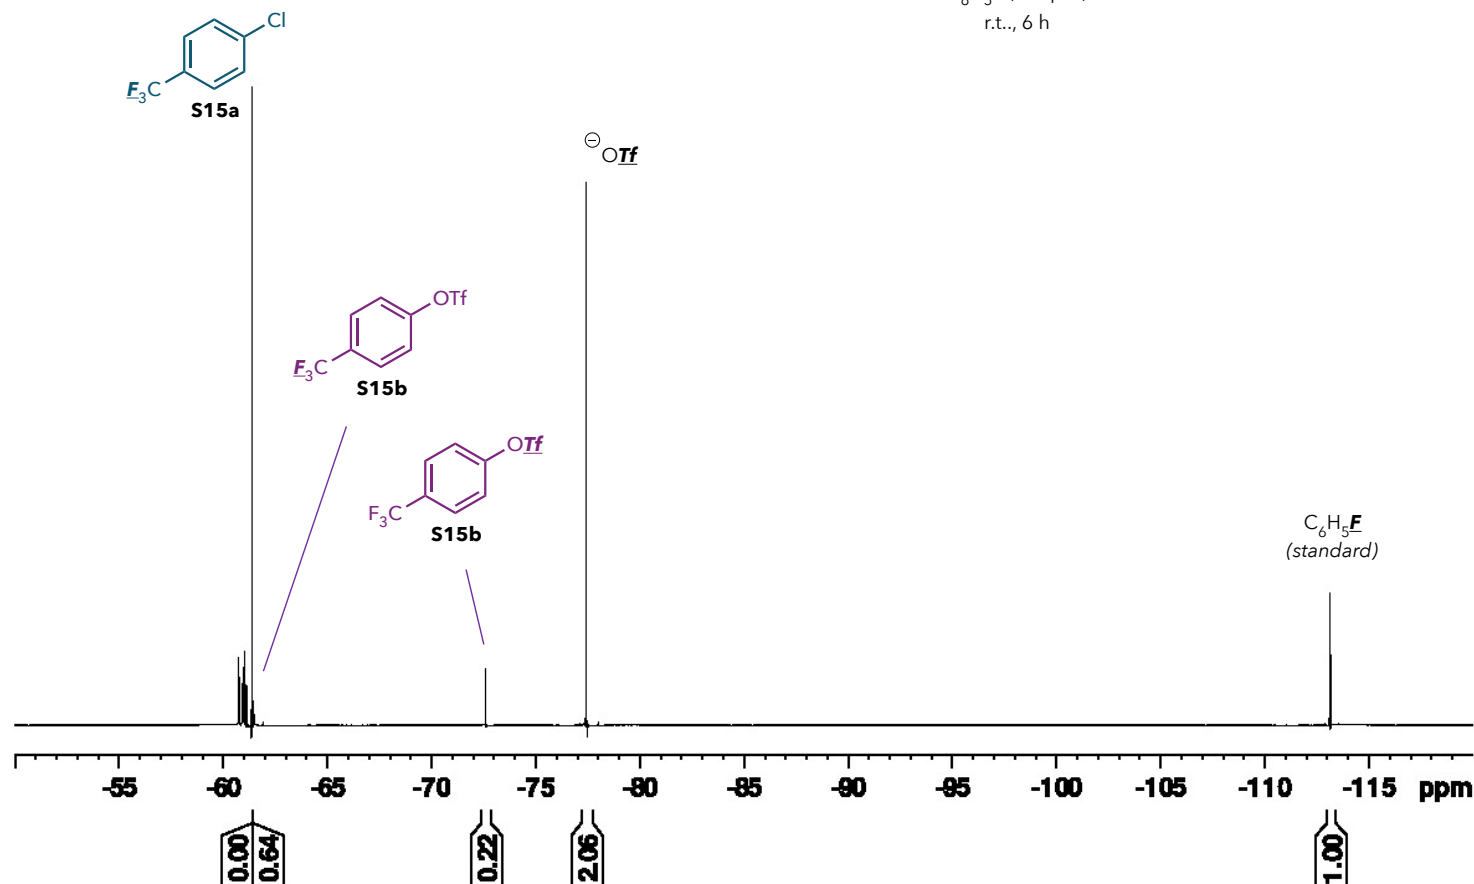

Current Data Parameters  
 NAME 6-SMR-38-11  
 EXPNO 10  
 PROCNO 2

F2 - Acquisition Parameter  
 Date\_ 20211113  
 Time 17.21 h  
 INSTRUM Avance Neo  
 PROBHD Z152088\_0031 (  
 PULPROG zgig  
 TD 131072  
 SOLVENT C6D6  
 NS 16  
 DS 4  
 SWH 90909.094 Hz  
 FIDRES 1.387163 Hz  
 AQ 0.7208960 sec  
 RG 101  
 DW 5.500 usec  
 DE 6.50 usec  
 TE 298.1 K  
 D1 1.00000000 sec  
 D11 0.03000000 sec  
 TD0 1  
 SFO1 376.4607164 MHz  
 NUC1 19F  
 P1 12.00 usec  
 PLW1 31.08900070 W  
 SFO2 400.1316005 MHz  
 NUC2 1H  
 CPDPRG[2] waltz16  
 PCPD2 90.00 usec  
 PLW2 24.03499985 W  
 PLW12 0.18990999 W

F2 - Processing parameters  
 SI 65536  
 SF 376.4978876 MHz  
 WDW EM  
 SSB 0  
 LB 0.30 Hz  
 GB 0  
 PC 1.00

84.90  
82.21  
78.44  
53.32

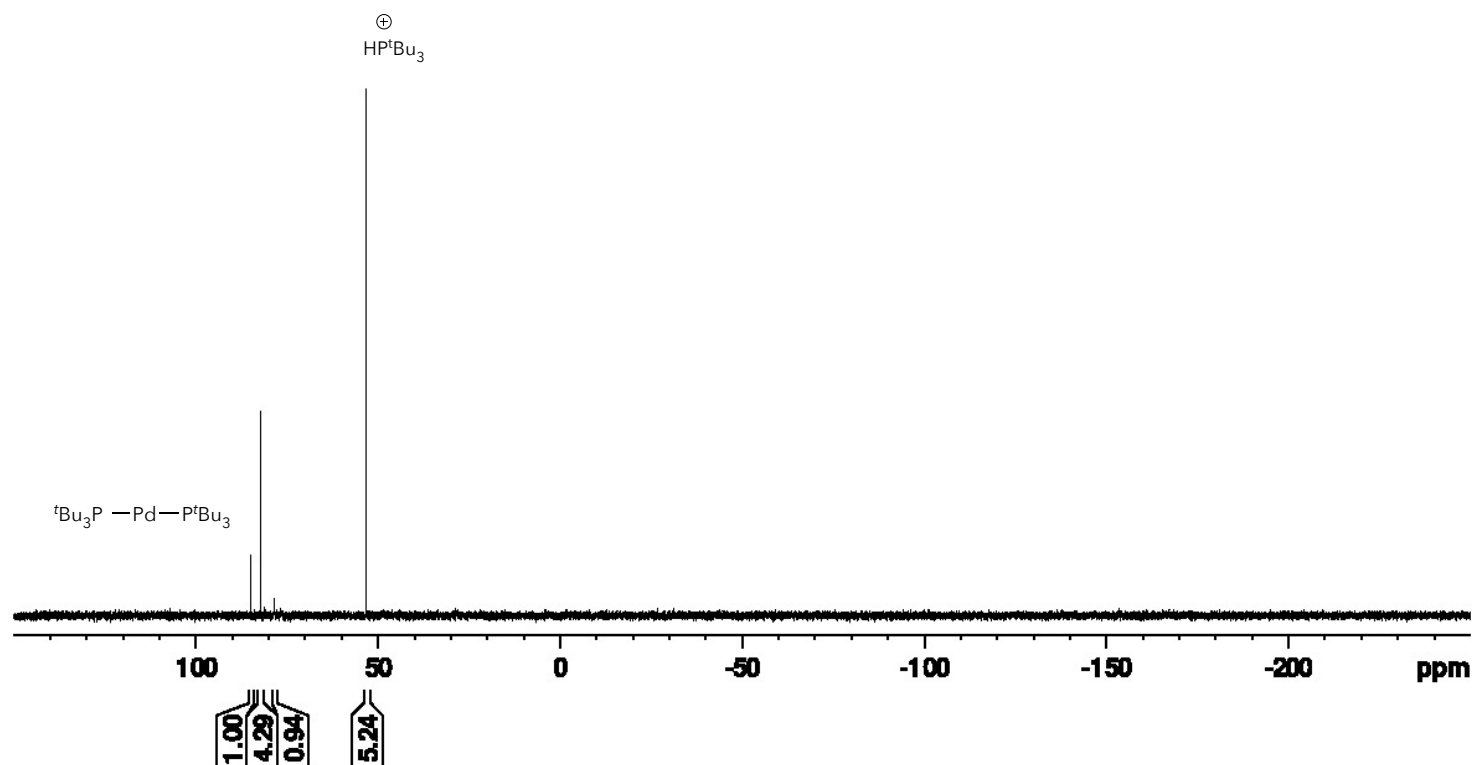

Current Data Parameters  
NAME 6-SMR-38-11  
EXPNO 11  
PROCNO 1

F2 - Acquisition Parameter  
Date\_ 20211113  
Time 17.24 h  
INSTRUM Avance Neo  
PROBHD Z152088\_0031 (   
PULPROG zgpg30  
TD 65536  
SOLVENT C6D6  
NS 32  
DS 4  
SWH 65789.477 Hz  
FIDRES 2.007735 Hz  
AQ 0.4980736 sec  
RG 101  
DW 7.600 usec  
DE 6.50 usec  
TE 298.0 K  
D1 2.00000000 sec  
D11 0.03000000 sec  
TD0 1  
SFO1 161.9674942 MHz  
NUC1 31P  
P0 2.67 usec  
P1 8.00 usec  
PLW1 45.86100006 W  
SFO2 400.1316005 MHz  
NUC2 1H  
CPDPRG[2 waltz16  
PCPD2 90.00 usec  
PLW2 24.03499985 W  
PLW12 0.18990999 W  
PLW13 0.09552100 W

F2 - Processing parameters  
SI 32768  
SF 161.9755930 MHz  
WDW EM  
SSB 0  
LB 1.00 Hz  
GB 0  
PC 1.40

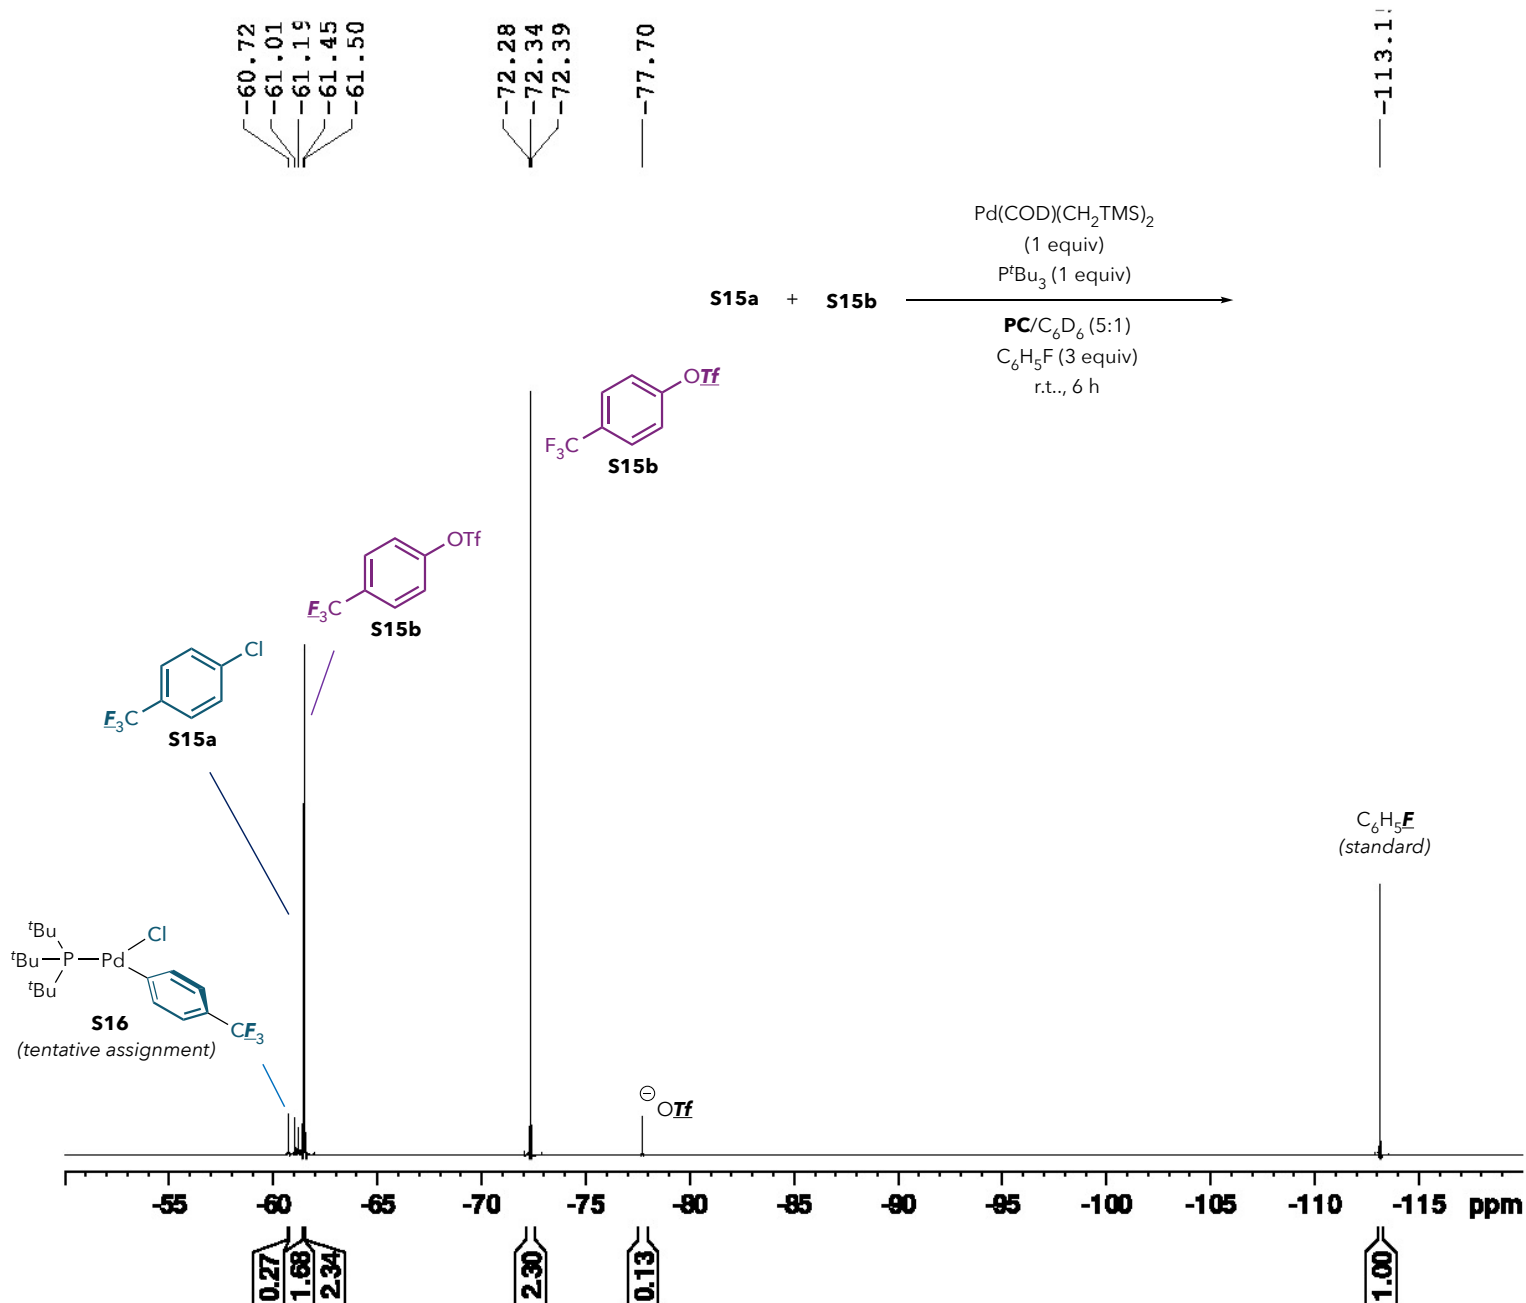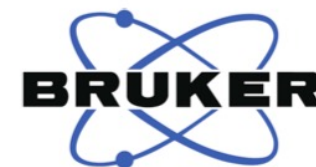

Current Data Parameters  
NAME 6-SMR-38-15  
EXPNO 10  
PROCNO 2

F2 - Acquisition Parameter  
Date\_ 20211113  
Time 17.40 h  
INSTRUM Avance Neo  
PROBHD Z152088\_0031 (  
PULPROG zgig  
TD 131072  
SOLVENT C6D6  
NS 16  
DS 4  
SWH 90909.094 Hz  
FIDRES 1.387163 Hz  
AQ 0.7208960 sec  
RG 101  
DW 5.500 usec  
DE 6.50 usec  
TE 298.1 K  
D1 1.00000000 sec  
D11 0.03000000 sec  
TD0 1  
SFO1 376.4607164 MHz  
NUC1 19F  
P1 12.00 usec  
PLW1 31.08900070 W  
SFO2 400.1316005 MHz  
NUC2 1H  
CPDPRG[2] waltz16  
PCPD2 90.00 usec  
PLW2 24.03499985 W  
PLW12 0.18990999 W

F2 - Processing parameters  
SI 65536  
SF 376.4978968 MHz  
WDW EM  
SSB 0  
LB 0.30 Hz  
GB 0  
PC 1.00

84.75  
80.68  
70.74  
55.29



Current Data Parameters  
NAME 6-SMR-38-15  
EXPNO 11  
PROCNO 1

F2 - Acquisition Parameter  
Date\_ 20211113  
Time 17.44 h  
INSTRUM Avance Neo  
PROBHD Z152088\_0031 (  
PULPROG zgpg30  
TD 65536  
SOLVENT C6D6  
NS 32  
DS 4  
SWH 65789.477 Hz  
FIDRES 2.007735 Hz  
AQ 0.4980736 sec  
RG 101  
DW 7.600 usec  
DE 6.50 usec  
TE 298.0 K  
D1 2.00000000 sec  
D11 0.03000000 sec  
TD0 1  
SFO1 161.9674942 MHz  
NUC1 31P  
P0 2.67 usec  
P1 8.00 usec  
PLW1 45.86100006 W  
SFO2 400.1316005 MHz  
NUC2 1H  
CPDPRG[2] waltz16  
PCPD2 90.00 usec  
PLW2 24.03499985 W  
PLW12 0.18990999 W  
PLW13 0.09552100 W

F2 - Processing parameters  
SI 32768  
SF 161.9755930 MHz  
WDW EM  
SSB 0  
LB 1.00 Hz  
GB 0  
PC 1.40

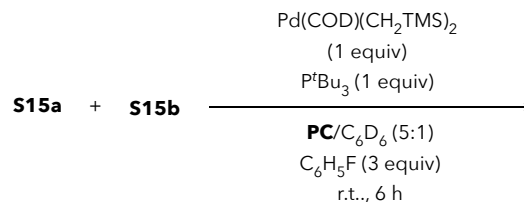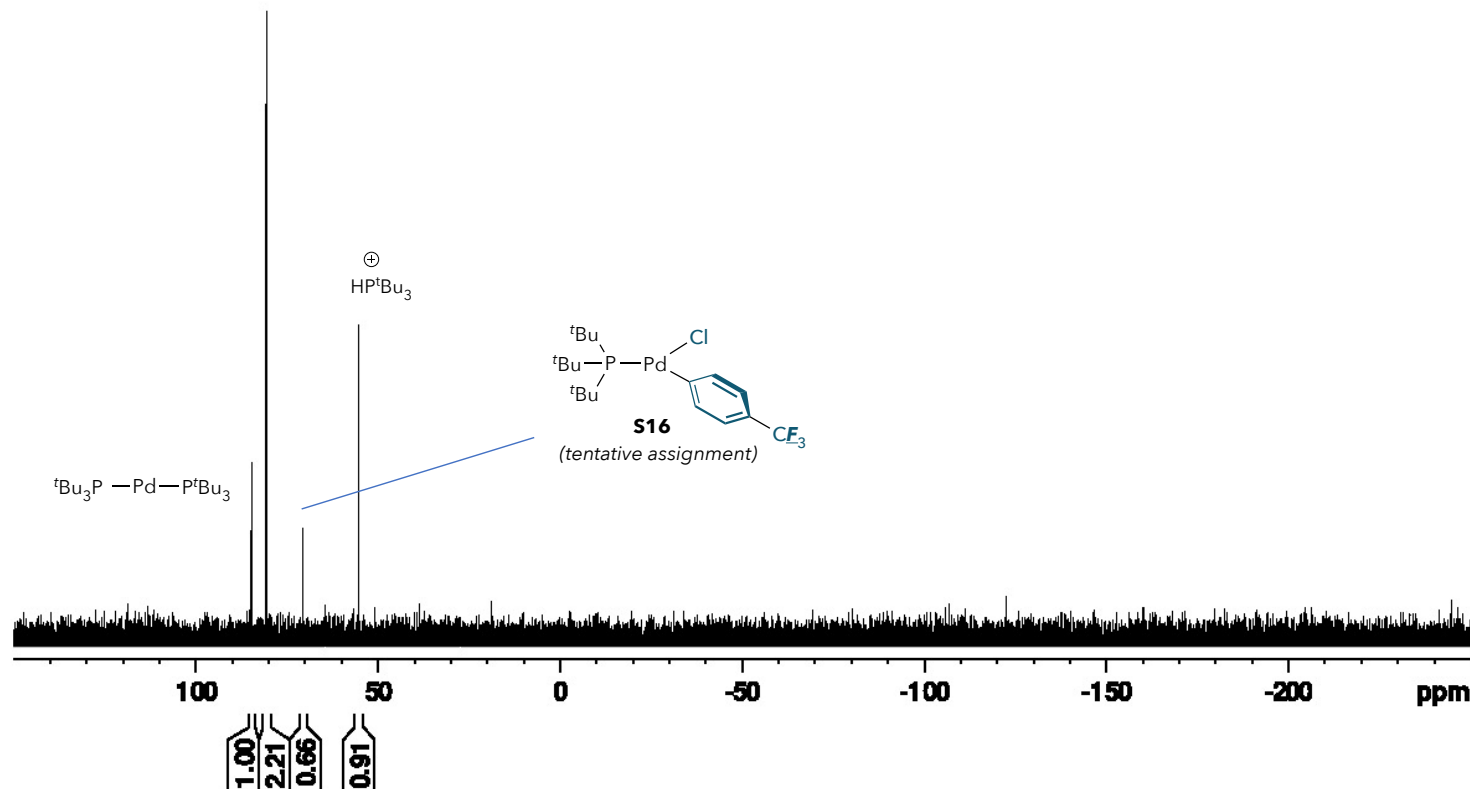

## D. Reaction with S11 and NBu<sub>4</sub>OTf

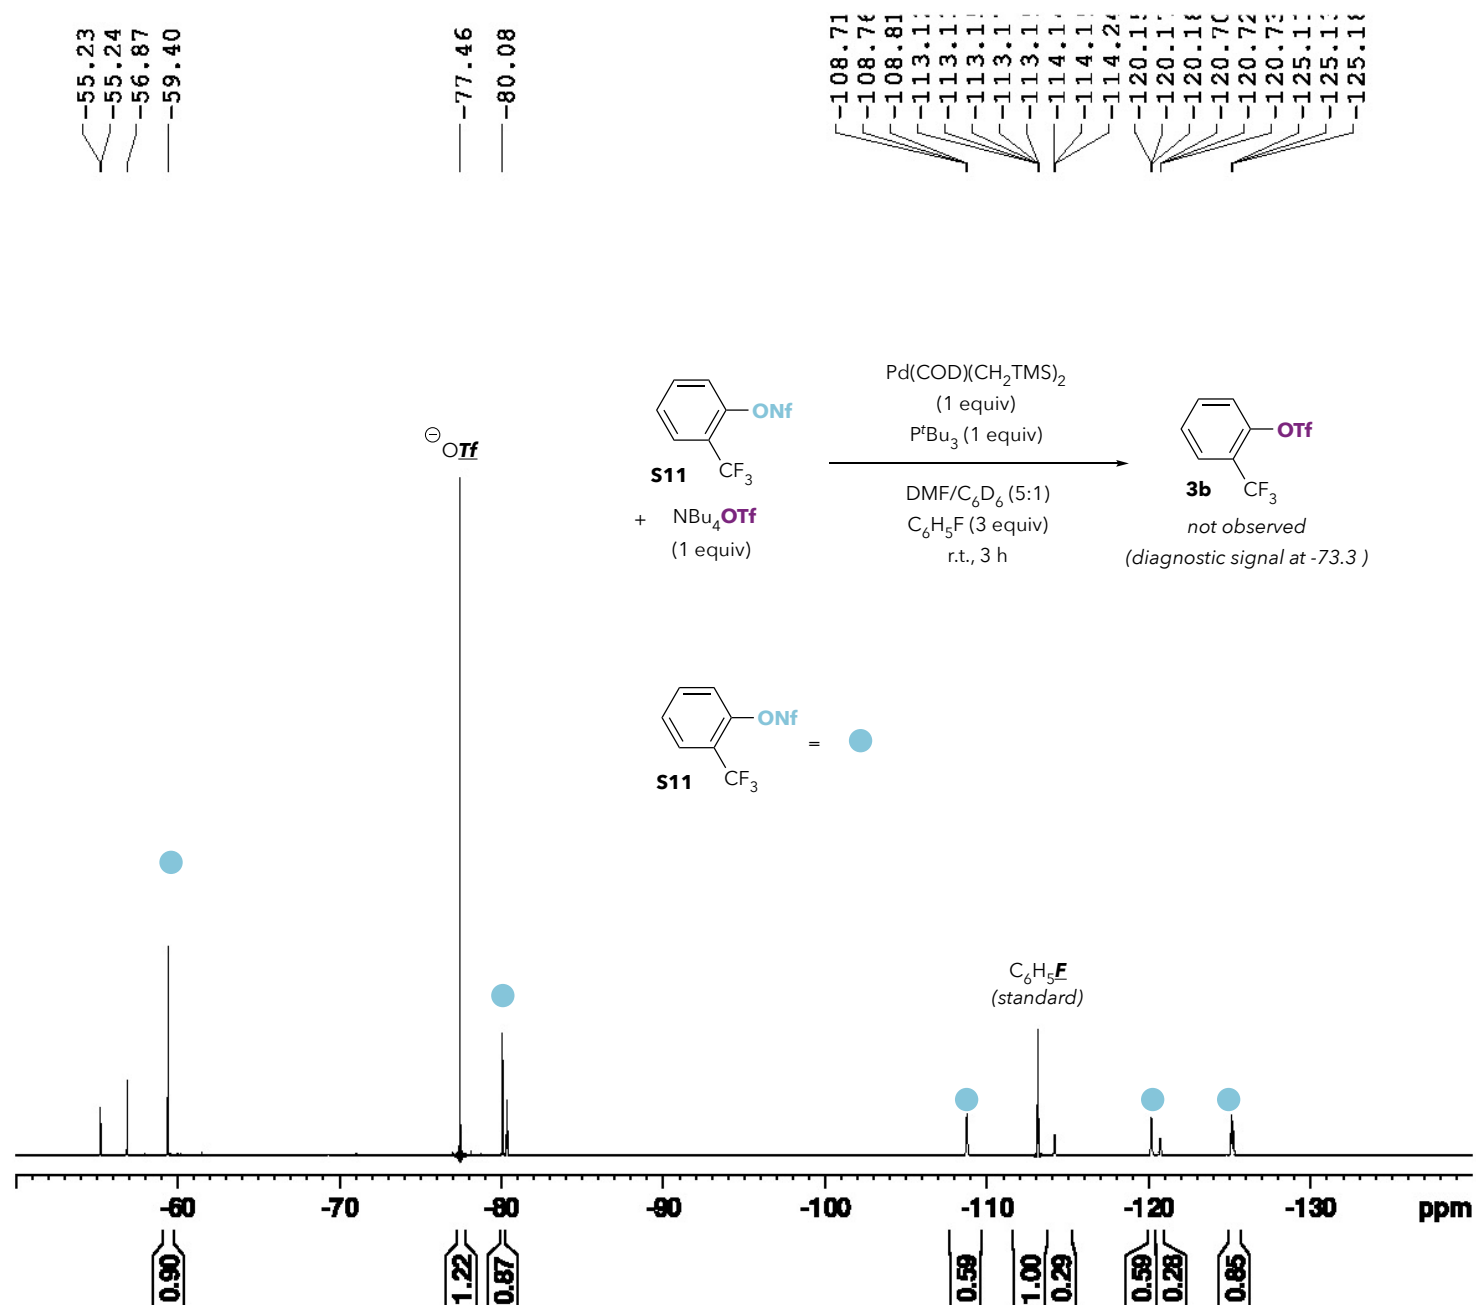

Current Data Parameters  
 NAME ER-6-57\_ONftoTf\_1  
 EXPNO 1  
 PROCNO 1

F2 - Acquisition Parameter  
 Date\_ 20200707  
 Time 10.36  
 INSTRUM spect  
 PROBHD 5 mm QNP 1H/13  
 PULPROG zgpg30  
 TD 32768  
 SOLVENT C6D6  
 NS 64  
 DS 0  
 SWH 50125.312 Hz  
 FIDRES 1.529703 Hz  
 AQ 0.3268608 sec  
 RG 2896.3  
 DW 9.975 usec  
 DE 6.00 usec  
 TE 683.2 K  
 D1 1.50000000 sec  
 TD0 1

===== CHANNEL f1 =====  
 NUC1 19F  
 P1 9.00 usec  
 PL1 0 dB  
 SFO1 282.4250465 MHz

F2 - Processing parameters  
 SI 65536  
 SF 282.4416726 MHz  
 WDW EM  
 SSB 0  
 LB 0.30 Hz  
 GB 0  
 PC 1.00

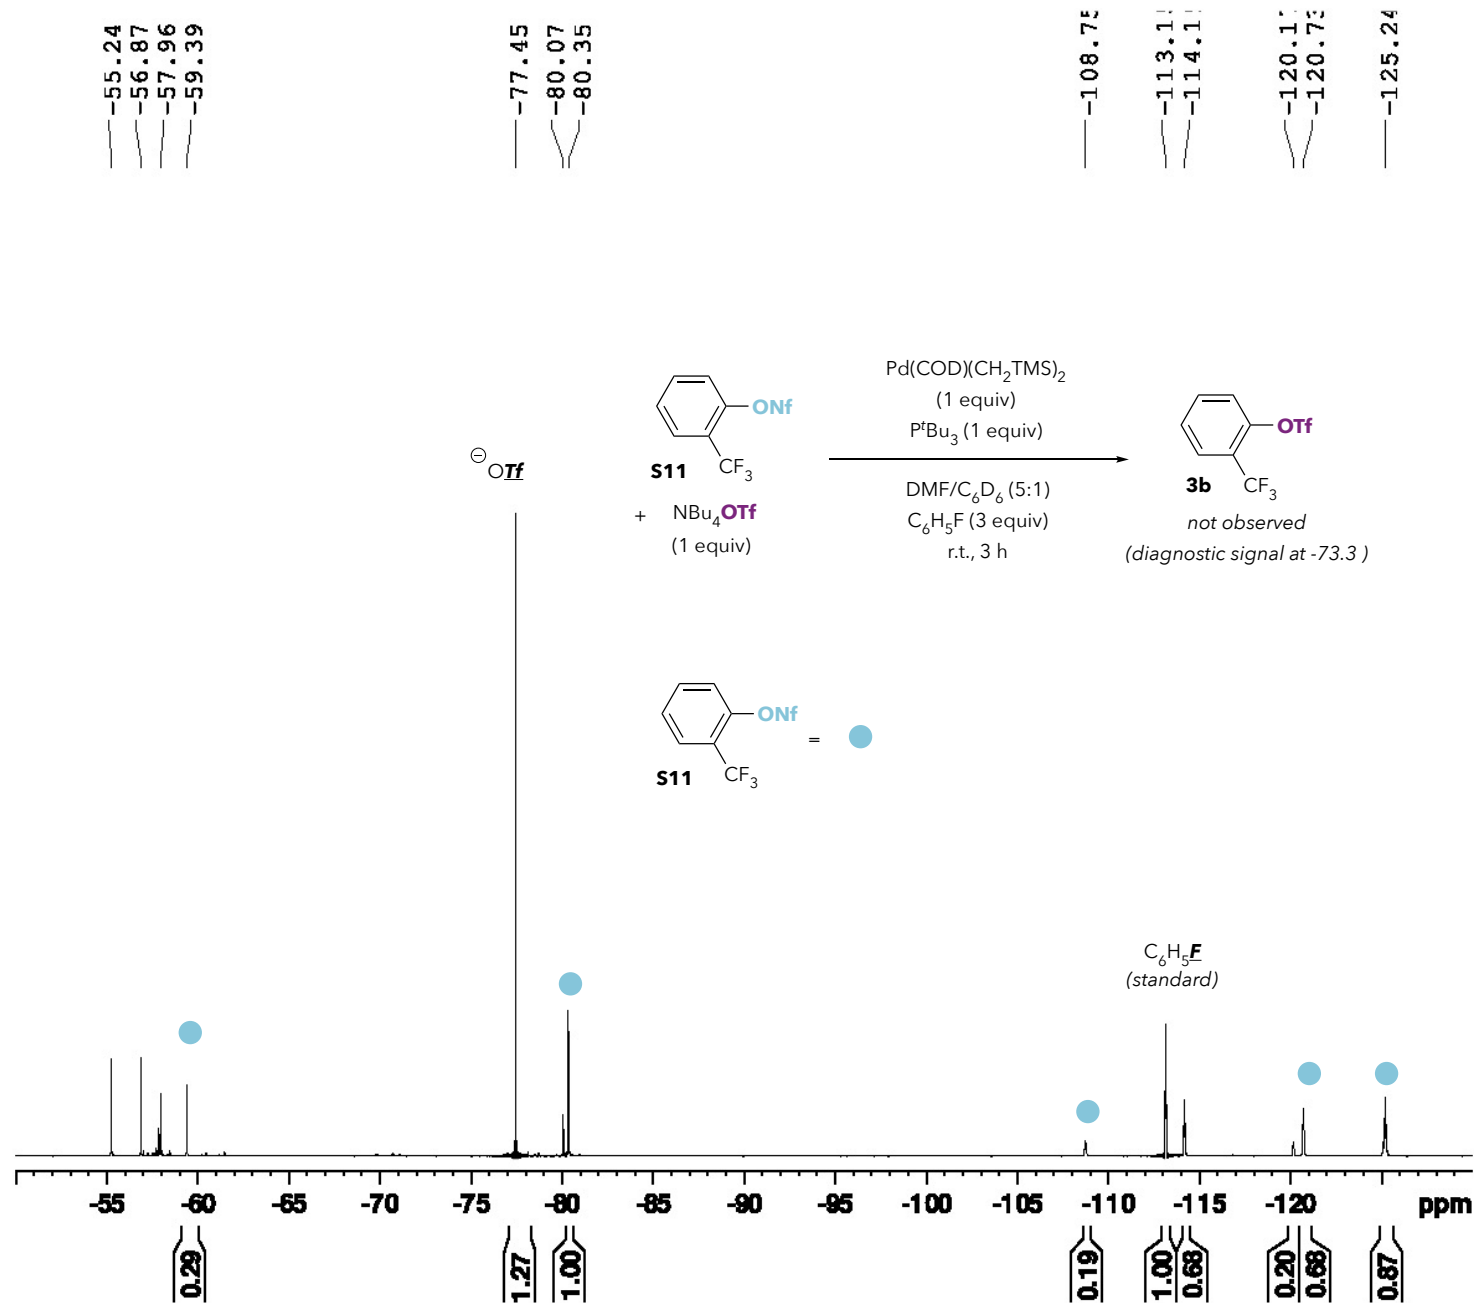

Current Data Parameters  
 NAME ER-6-57\_ONftoOTf\_1  
 EXPNO 2  
 PROCNO 1

F2 - Acquisition Parameter  
 Date\_ 20200709  
 Time 9.09  
 INSTRUM spect  
 PROBHD 5 mm QNP 1H/13  
 PULPROG zgpg30  
 TD 32768  
 SOLVENT C6D6  
 NS 64  
 DS 0  
 SWH 50125.312 Hz  
 FIDRES 1.529703 Hz  
 AQ 0.3268608 sec  
 RG 2896.3  
 DW 9.975 usec  
 DE 6.00 usec  
 TE 683.2 K  
 D1 1.50000000 sec  
 TD0 1

===== CHANNEL f1 =====  
 NUC1 19F  
 P1 9.00 usec  
 PL1 0 dB  
 SFO1 282.4250465 MHz

F2 - Processing parameters  
 SI 65536  
 SF 282.4416743 MHz  
 WDW EM  
 SSB 0  
 LB 0.30 Hz  
 GB 0  
 PC 1.00
